# Supplementary material for: Genome Sequence of Peacock Reveals the Peculiar Case of a Glittering Bird
Source: Front Genet. 2018 Sep 19;9:392. doi: 10.3389/fgene.2018.00392 (PMC6156156; doi:10.3389/fgene.2018.00392)
Supplement: Supplementary file 2 [file Table_1.XLSX]

## Sheet: ENSID_to_gene_families
Gene Family	The different Ensembl IDs belonging to gene families which showed either expansion or contraction in peacock.
FAM_95	ENSMGAG00000010778.2	ENSMGAG00000013960.2	ENSGALG00000043121.1	ENSGALG00000029658.1	ENSMGAG00000014488.2	ENSGALG00000042295.1	ENSMGAG00000009978.2	ENSGALG00000024335.3	ENSGALG00000034134.1	ENSGALG00000032405.1	ENSMGAG00000009944.2	ENSMGAG00000016763.1	ENSGALG00000042850.1	ENSGALG00000034219.1	ENSMGAG00000008800.2	ENSGALG00000034527.1
FAM_118	ENSGALG00000039490.1	ENSGALG00000037921.1	ENSGALG00000036408.1	ENSGALG00000030491.1	ENSGALG00000033752.1	ENSGALG00000039402.1	ENSGALG00000037821.1	ENSGALG00000043157.1	ENSGALG00000035556.1	ENSFALG00000014367.1	ENSGALG00000029956.1	ENSGALG00000030912.1	ENSMGAG00000012977.2	ENSGALG00000035174.1	ENSGALG00000031241.1
FAM_442	ENSPSIG00000010162.1	ENSMGAG00000009478.2	ENSPSIG00000006725.1	ENSFALG00000002135.1	ENSMGAG00000010967.2	ENSACAG00000001101.3	p_ENSMGAT00000010616	ENSTGUG00000014260.1	ENSPSIG00000007303.1	ENSMGAG00000003662.2	p_ENSMGAT00000012305	p_ENSMGAT00000012247	p_ENSMGAT00000018977	ENSPSIG00000009950.1	p_ENSMGAT00000018289	ENSTGUG00000004547.1
FAM_1498	ENSFALG00000014115.1	ENSFALG00000014121.1	ENSGALG00000036152.1	ENSGALG00000028842.2	p_ENSGALG00000038206	ENSGALG00000034043.1	ENSGALG00000029633.1	ENSTGUG00000003036.1	ENSGALG00000031115.1	p_ENSGALG00000040341	ENSGALG00000027859.1	ENSFALG00000009456.1	ENSAPLG00000001775.1	p_ENSGALG00000040457	p_ENSGALG00000033893	ENSTGUG00000013906.1	ENSGALG00000033308.1	ENSGALG00000039063.1	ENSMGAG00000016632.1	p_ENSGALG00000041545	ENSTGUG00000001983.1	p_ENSGALG00000035763	p_ENSGALG00000041100	p_ENSGALG00000042594	p_ENSGALG00000036192	ENSFALG00000015174.1	ENSFALG00000015229.1	ENSTGUG00000016152.1	ENSTGUG00000004302.1	ENSFALG00000014103.1	p_ENSGALG00000030191	ENSAPLG00000002267.1	p_ENSGALG00000033240	ENSGALG00000040928.1	ENSGALG00000041856.1	ENSAPLG00000001772.1	ENSTGUG00000018450.1	p_ENSGALG00000037252	p_ENSGALG00000033866	ENSGALG00000041271.1	ENSGALG00000035763.1	p_ENSGALG00000026257	ENSAPLG00000002272.1	ENSAPLG00000000933.1	ENSGALG00000038246.1	ENSTGUG00000018425.1	ENSGALG00000036188.1	p_ENSGALG00000042174	ENSGALG00000042364.1
FAM_3394	p_g15591	ENSGALG00000034924.1	p_g15454	p_g4761	p_g1876	ENSAPLG00000001085.1	p_g965	p_g13829
FAM_3395	p_g19362	p_g27587	p_g29433	p_g7719	p_g9366	p_g1559	p_g18760	p_g10094	p_g8534	p_g3414	p_g9273	p_g1640	p_g18765	p_g26143	p_g24828	p_g7559	p_g15844	p_g92	p_g9015	p_g8065	p_g5980	p_g26485	p_g8640	p_g8881	p_g7089	p_g2423	p_g8771	p_g1882	p_g15973	p_g16726	p_g12947	p_g20666	p_g7640	p_g6150	p_g12150	p_g22352	p_g7908
FAM_3396	ENSMGAG00000016600.1	ENSPSIG00000001608.1	ENSPSIG00000000744.1	p_g18788	p_g12108	ENSPSIG00000000287.1	ENSPSIG00000000192.1	ENSPSIG00000001479.1	p_g23534	p_g11365	p_g29973	p_g25168	p_g21585	p_g4993	p_g28221	p_g8604	p_g9118	ENSPSIG00000000494.1	p_g21256	ENSPSIG00000000745.1	p_g8948	ENSPSIG00000000833.1	ENSPSIG00000002049.1	ENSPSIG00000000245.1	p_g17859	ENSPSIG00000000675.1	ENSPSIG00000001639.1	ENSPSIG00000000694.1	ENSPSIG00000001187.1	p_g4127	p_g21195	p_g11056	p_g16837	p_g23572	p_g26537	p_g4203	ENSPSIG00000000334.1	p_g6381	p_g3115	ENSPSIG00000000314.1	p_g3773	p_g4177	ENSPSIG00000001590.1	p_g7307	p_g28596	ENSPSIG00000000775.1	ENSPSIG00000006882.1	p_g22457	ENSPSIG00000000264.1
FAM_3397	p_g1048	p_g5138	p_g16764	p_g1334	p_g21854	p_g20426	p_g29371	p_g2308	p_g13140	p_g24169	p_g4646	p_g29079	p_g26273	p_g2001	p_g18745	p_g26903	p_g9500	p_g25619	p_g29815	p_g8963	p_g19802	p_g28077	p_g29125	p_g3269	p_g22225	p_g2600	p_g430	p_g23528	p_g11045	p_g21294	p_g3709	p_g7636	p_g5259	p_g14504	p_g3203	p_g19249	p_g10935	p_g7628	p_g8591	p_g22064	p_g7021	p_g7084	p_g6228	p_g12452	p_g28547	p_g5446	p_g26242	p_g5333	p_g5119
FAM_3398	p_g15646	p_g3337	p_g14848	p_g3190	p_g2121	p_g29156	p_g7681	p_g22447	p_g7400	p_g9765	p_g15718	p_g29423	p_g3999	p_g3017	p_g20547	p_g29412	p_g2359	p_g29300	p_g1762	p_g4354	p_g17503	p_g25330	p_g10688	p_g4639	p_g23311	p_g1655	p_g15415	p_g1517	p_g8609	p_g20194	p_g6307	p_g17089	p_g24689	p_g15329	p_g27925	p_g861	p_g23563	p_g3296	p_g11439	p_g19242	p_g29978	p_g974	p_g21945	p_g25597	p_g5949	p_g20818	p_g20783	p_g13715	p_g1024
FAM_3399	p_g17516	p_g6936	p_g8458	p_g14821	p_g10443	p_g10974	p_g6127	p_g2081	p_g15565	p_g26660	p_g21534	p_g7468	p_g21830	p_g14917	p_g29780	p_g6230	p_g11154	p_g13312	p_g4987	p_g10031	p_g9519	p_g9889	p_g24755	p_g16109	p_g20013
FAM_3401	p_g18638	p_g324	p_g8699	p_g10466	p_g596
FAM_3408	p_g25399	p_g9457	p_g3220	p_g19196	p_g9327
FAM_3409	p_g20409	p_g17772	p_g1101	p_g894	p_g27997	p_g4918	p_g3274	p_g9790
FAM_3415	p_g5014	p_g23984	p_g29303	p_g6001	p_g14790
FAM_3420	ENSPSIG00000001207.1	ENSPSIG00000000036.1	ENSPSIG00000000636.1	ENSPSIG00000001393.1	ENSPSIG00000001423.1	ENSPSIG00000000868.1	ENSPSIG00000000510.1	ENSPSIG00000000429.1	ENSPSIG00000000339.1	ENSPSIG00000000961.1	ENSPSIG00000000703.1	ENSPSIG00000000004.1	ENSPSIG00000001379.1	ENSPSIG00000001285.1	ENSPSIG00000001536.1	ENSPSIG00000001829.1	ENSPSIG00000000812.1	ENSPSIG00000000361.1	ENSPSIG00000001488.1	ENSPSIG00000000238.1	ENSPSIG00000000070.1	ENSPSIG00000000444.1	ENSPSIG00000000845.1	ENSPSIG00000001693.1	ENSPSIG00000001446.1	ENSPSIG00000000222.1	ENSPSIG00000000420.1	ENSPSIG00000001093.1	ENSPSIG00000001301.1	ENSPSIG00000001538.1	ENSPSIG00000001630.1	ENSPSIG00000000619.1	ENSPSIG00000001670.1	ENSPSIG00000001845.1	ENSPSIG00000000463.1	ENSPSIG00000000479.1	ENSPSIG00000000591.1	ENSPSIG00000000112.1	ENSPSIG00000001138.1	ENSPSIG00000000062.1	ENSPSIG00000001428.1	ENSPSIG00000000030.1	ENSPSIG00000000777.1	ENSPSIG00000000263.1	ENSPSIG00000001238.1	ENSPSIG00000000486.1	ENSPSIG00000000473.1	ENSPSIG00000001501.1	ENSPSIG00000000362.1
FAM_3421	p_g14487	p_g2540	p_g1587	p_g2374	p_g17534	p_g3807	p_g16537	p_g10160	ENSACAG00000029142.1	p_g4952	p_g1251
FAM_3431	ENSPSIG00000001649.1	ENSPSIG00000001566.1	p_g3506	ENSPSIG00000001203.1	p_g11052	p_g24533	p_g216	ENSPSIG00000000172.1	p_g20432	ENSPSIG00000000797.1
FAM_3432	p_g3882	p_g565	p_g25603	p_g18466	p_g18526	p_g16319	p_g3981	p_g11029
FAM_3441	p_g3183	p_g1680	p_g29681	p_g28579	p_g8235
FAM_3451	p_g2640	p_g23654	p_g487	p_g22508	p_g3409
FAM_3510	ENSGALG00000037126.1	ENSGALG00000031581.1	ENSGALG00000029849.1	ENSAPLG00000001096.1	ENSGALG00000037168.1	p_ENSGALG00000031581	ENSGALG00000031926.1	ENSGALG00000035424.1	ENSGALG00000033317.1	ENSAPLG00000012797.1	ENSGALG00000040952.1	p_ENSGALG00000043640	ENSGALG00000031181.1	ENSGALG00000043640.1
FAM_4189	ENSMGAG00000002539.2	ENSGALG00000033116.1	ENSGALG00000038626.1	ENSGALG00000038656.1	ENSGALG00000031037.1	ENSGALG00000042449.1	ENSGALG00000033235.1	ENSMGAG00000014925.2	ENSGALG00000033302.1	ENSGALG00000033672.1	ENSGALG00000042611.1	ENSGALG00000036888.1	ENSGALG00000042023.1	ENSGALG00000042684.1	ENSGALG00000041597.1
FAM_4756	p_ENSMGAT00000019514	ENSAPLG00000006066.1	ENSMGAG00000016873.1	ENSAPLG00000006063.1	p_ENSMGAT00000019457	p_ENSMGAT00000003091	ENSTGUG00000005141.1	ENSFALG00000006513.1	p_ENSMGAT00000019301	ENSMGAG00000002331.2	p_ENSMGAT00000020261	ENSACAG00000009283.3
FAM_6563	ENSGALG00000042659.1	ENSGALG00000035521.1	ENSGALG00000035519.1	ENSGALG00000036708.1	ENSGALG00000040974.1	ENSGALG00000034972.1	ENSGALG00000040273.1	ENSGALG00000029641.1	ENSGALG00000034184.1	ENSGALG00000029822.1	ENSGALG00000034287.1	ENSGALG00000043586.1	ENSGALG00000029398.1	ENSGALG00000033393.1	ENSGALG00000036756.1	ENSGALG00000039324.1	ENSGALG00000035256.1	ENSGALG00000040774.1	ENSGALG00000039410.1	ENSGALG00000031573.1
FAM_8375	ENSGALG00000034781.1	ENSGALG00000040965.1	ENSGALG00000030965.1	ENSGALG00000034570.1	ENSGALG00000033610.1	ENSGALG00000029575.1
FAM_13828	ENSTGUG00000015357.1	ENSTGUG00000014085.1	ENSTGUG00000015344.1	ENSTGUG00000014559.1	p_ENSMGAT00000001852	ENSAPLG00000013388.1	ENSAPLG00000013344.1	ENSTGUG00000004522.1	ENSMGAG00000008654.1	ENSTGUG00000014476.1	ENSMGAG00000004232.2	ENSAPLG00000016387.1	ENSTGUG00000014609.1	ENSTGUG00000013923.1	ENSTGUG00000014297.1	p_ENSMGAT00000009224	ENSTGUG00000011432.1	ENSMGAG00000003782.1	ENSMGAG00000007766.1	ENSMGAG00000001655.1	ENSMGAG00000005603.1	ENSMGAG00000010977.2	ENSFALG00000009075.1	p_ENSMGAT00000006278	ENSMGAG00000005579.2	ENSTGUG00000015462.1	p_ENSMGAT00000004218	ENSMGAG00000008245.2	ENSAPLG00000006026.1	ENSTGUG00000014590.1	ENSFALG00000004758.1	ENSMGAG00000003944.2	ENSTGUG00000005452.1	ENSMGAG00000003794.1	p_ENSMGAT00000012324	ENSTGUG00000016679.1	ENSMGAG00000008223.1	p_ENSMGAT00000004720	ENSTGUG00000005431.1	p_g7535	ENSTGUG00000014597.1	ENSMGAG00000001685.2	ENSMGAG00000004140.1	ENSAPLG00000007821.1	p_ENSMGAT00000004624	ENSTGUG00000014337.1
FAM_14210	ENSGALG00000037690.1	ENSGALG00000035489.1	ENSGALG00000035998.1	ENSGALG00000039296.1	ENSGALG00000035863.1	ENSGALG00000031712.1	ENSGALG00000029597.1	ENSGALG00000037738.1	ENSMGAG00000009917.1	ENSGALG00000036558.1	ENSGALG00000029246.1	ENSFALG00000004845.1	ENSGALG00000041073.1	ENSGALG00000038387.1	ENSMGAG00000006655.2	ENSTGUG00000000395.1	ENSACAG00000001424.3	ENSGALG00000041637.1	ENSAPLG00000006365.1	ENSPSIG00000016850.1	ENSGALG00000036872.1	p_ENSGALG00000000428	ENSGALG00000032641.1	ENSGALG00000000428.2
FAM_17403	ENSGALG00000040883.1	ENSGALG00000036246.1	ENSGALG00000033374.1	ENSGALG00000032407.1	ENSMGAG00000012187.2	ENSGALG00000041240.1	ENSMGAG00000012196.2
FAM_19930	ENSGALG00000039845.1	ENSGALG00000035326.1	ENSGALG00000035664.1	ENSGALG00000033190.1	ENSGALG00000036472.1	ENSGALG00000042091.1
FAM_20089	ENSGALG00000035647.1	ENSGALG00000043111.1	ENSGALG00000031283.1	ENSMGAG00000016780.1	ENSGALG00000032765.1	ENSGALG00000041070.1
FAM_20308	p_ENSGALG00000035451	ENSGALG00000040216.1	p_ENSGALG00000034466	ENSGALG00000031100.1	ENSGALG00000040616.1	ENSGALG00000034411.1	ENSGALG00000034563.1	p_ENSGALG00000035249	ENSGALG00000031792.1	p_ENSGALG00000040216	p_ENSGALG00000030477	p_ENSGALG00000033483	ENSGALG00000033483.1	ENSGALG00000042888.1	ENSGALG00000038975.1	ENSGALG00000042560.1	ENSGALG00000035451.1	ENSGALG00000036127.1	p_ENSGALG00000031101	ENSGALG00000036769.1	ENSGALG00000033824.1	p_ENSGALG00000031956	p_ENSGALG00000033210	ENSGALG00000037683.1	ENSGALG00000037139.1	ENSGALG00000039602.1	p_ENSGALG00000035691	p_ENSGALG00000042560	ENSGALG00000032574.1	p_ENSGALG00000034411	ENSGALG00000034976.1	ENSGALG00000034466.1	ENSGALG00000036407.1	ENSGALG00000031956.1	p_ENSGALG00000029309	p_ENSGALG00000033114	p_ENSGALG00000030015	ENSGALG00000033210.1	ENSGALG00000032890.1	ENSGALG00000033729.1	p_ENSGALG00000040616	p_ENSGALG00000034563	ENSGALG00000032887.1	ENSGALG00000032371.1	ENSGALG00000035249.1	p_ENSGALG00000033824	ENSGALG00000029209.1	ENSGALG00000037794.1	ENSGALG00000037876.1
FAM_20310	p_ENSGALG00000031239	ENSGALG00000042997.1	p_ENSGALG00000029868	ENSGALG00000038497.1	ENSGALG00000033747.1	ENSGALG00000033787.1	p_ENSGALG00000031624	p_ENSGALG00000032604	ENSGALG00000032604.1	ENSGALG00000033897.1	ENSGALG00000039504.1	ENSGALG00000031048.1	ENSGALG00000038857.1	p_ENSGALG00000033375	ENSGALG00000032482.1	ENSGALG00000032041.1	ENSGALG00000031624.1	p_ENSGALG00000033584	p_ENSGALG00000039504	p_ENSGALG00000031924	ENSGALG00000031924.1	ENSGALG00000030490.1	p_ENSGALG00000036127	ENSGALG00000033375.1	ENSGALG00000038792.1	ENSGALG00000036127.1	p_ENSGALG00000038497	ENSGALG00000036403.1	ENSGALG00000038917.1	ENSGALG00000031239.1	p_ENSGALG00000033787	ENSGALG00000033546.1	ENSGALG00000033584.1	p_ENSGALG00000032041	p_ENSGALG00000036403	ENSGALG00000029868.1
FAM_20314	ENSGALG00000040577.1	p_ENSGALG00000043211	ENSGALG00000041342.1	ENSGALG00000039298.1	ENSGALG00000029472.1	p_ENSGALG00000029472	p_ENSGALG00000038888	ENSGALG00000042500.1	ENSGALG00000031574.1	ENSGALG00000031701.1	ENSGALG00000030636.1	p_ENSGALG00000041342	ENSGALG00000030092.1	ENSGALG00000041961.1	ENSGALG00000038888.1	ENSGALG00000043211.1	ENSGALG00000043432.1	p_ENSGALG00000033968	p_ENSGALG00000030636	ENSGALG00000032414.1	p_ENSGALG00000039866	p_ENSGALG00000031574	ENSGALG00000033968.1	ENSGALG00000032862.1	ENSGALG00000039548.1	p_ENSGALG00000032862	p_ENSGALG00000030092	p_ENSGALG00000041961	p_ENSGALG00000039298	ENSGALG00000040486.1	p_ENSGALG00000039548	ENSGALG00000039866.1
FAM_20707	ENSGALG00000038361.1	ENSGALG00000043339.1	ENSGALG00000031089.1	ENSGALG00000035637.1	ENSGALG00000036478.1	ENSGALG00000030807.1
FAM_20814	ENSGALG00000033108.1	ENSGALG00000038998.1	ENSGALG00000034142.1	ENSGALG00000037444.1	ENSGALG00000037903.1	ENSGALG00000037942.1	ENSGALG00000042915.1	ENSGALG00000036187.1	ENSGALG00000035155.1	ENSGALG00000040287.1	ENSGALG00000040009.1	ENSGALG00000038877.1	ENSGALG00000038472.1	ENSGALG00000032880.1	ENSGALG00000043615.1	ENSGALG00000043717.1	ENSGALG00000040803.1	ENSGALG00000036119.1	ENSGALG00000030329.1	ENSGALG00000037364.1	ENSGALG00000035723.1	ENSGALG00000032054.1	ENSGALG00000041481.1	ENSGALG00000040132.1	ENSGALG00000037987.1	ENSGALG00000031223.1	ENSGALG00000036515.1	ENSGALG00000040736.1	ENSGALG00000036758.1	ENSGALG00000043578.1	ENSGALG00000032731.1	ENSGALG00000043537.1	ENSTGUG00000016331.1	ENSGALG00000036804.1	ENSGALG00000030458.1	ENSGALG00000037512.1	ENSGALG00000030373.1	ENSGALG00000036445.1	ENSGALG00000030033.1	ENSGALG00000040092.1	ENSGALG00000033939.1	ENSGALG00000043069.1	ENSGALG00000037658.1	ENSGALG00000031959.1
FAM_20818	ENSGALG00000040518.1	ENSGALG00000038431.1	ENSGALG00000031028.1	ENSGALG00000036202.1	ENSGALG00000043134.1	ENSGALG00000039015.1	ENSGALG00000033861.1	ENSGALG00000036277.1	ENSGALG00000033722.1	ENSGALG00000041127.1	ENSGALG00000031187.1	ENSGALG00000037032.1	ENSGALG00000030306.1	ENSGALG00000032205.1	ENSGALG00000030953.1	ENSGALG00000039711.1	ENSGALG00000040317.1	ENSGALG00000039046.1	ENSGALG00000042862.1	ENSGALG00000034981.1	ENSGALG00000038149.1	ENSTGUG00000016336.1	ENSGALG00000029313.1	ENSGALG00000037161.1	ENSGALG00000037424.1	ENSGALG00000038872.1	ENSGALG00000031743.1	ENSGALG00000029215.1	ENSGALG00000034902.1	ENSGALG00000034181.1	ENSGALG00000036761.1	ENSGALG00000042649.1
FAM_20821	ENSGALG00000040579.1	ENSGALG00000042178.1	ENSGALG00000035633.1	ENSGALG00000031654.1	ENSGALG00000037468.1	ENSGALG00000034597.1	ENSGALG00000030523.1	ENSGALG00000035929.1	ENSGALG00000032243.1	ENSGALG00000030067.1	ENSGALG00000041221.1	ENSGALG00000030207.1	ENSGALG00000030244.1	ENSGALG00000040531.1	ENSGALG00000038628.1	ENSGALG00000043005.1
FAM_20864	ENSGALG00000033321.1	ENSGALG00000042040.1	ENSGALG00000042194.1	ENSGALG00000039933.1	ENSGALG00000034641.1	ENSGALG00000042965.1	ENSGALG00000041394.1	ENSGALG00000039370.1	ENSGALG00000038928.1	ENSGALG00000035347.1	ENSGALG00000035385.1	ENSGALG00000035971.1
[truncated: 206 more columns]
