# Supplementary material for: Genome Sequence of Peacock Reveals the Peculiar Case of a Glittering Bird
Source: Front Genet. 2018 Sep 19;9:392. doi: 10.3389/fgene.2018.00392 (PMC6156156; doi:10.3389/fgene.2018.00392)
Supplement: Supplementary file 4 [file Table_3.XLSX]

## Sheet: parameters_for_possel
Ensembl Reference IDs	Gene_symbol	Description	LO	L1	DOF	P Value	fdr q-value
ENSGALG00000001473_ENSGALT00000002235	MIB2	E3_ubiquitin-protein_ligase_MIB2_[Source:RefSeq_peptide;Acc:NP_001006301]	-6751.04	-6506.72	1	2.80651e-108	1.65865e-104
ENSGALG00000002314_ENSGALT00000041171	CDHR1	cadherin-related_family_member_1_precursor_[Source:RefSeq_peptide;Acc:NP_001001759]	-6878.46	-6641.17	1	3.23891e-105	9.57099e-102
ENSGALG00000042552_ENSGALT00000065033			-11448.5	-11212.8	1	1.65895e-104	3.26813e-101
ENSGALG00000002162_ENSGALT00000076439	ACO1	cytoplasmic_aconitate_hydratase_[Source:RefSeq_peptide;Acc:NP_001025707]	-6713.75	-6524.41	1	2.39737e-84	3.54211e-81
ENSGALG00000014798_ENSGALT00000023888	SERINC5	serine_incorporator_5_[Source:HGNC_Symbol;Acc:HGNC:18825]	-3806.07	-3623.91	1	3.23058e-81	3.54466e-78
ENSGALG00000009601_ENSGALT00000038787	NELL2	protein_NEL_precursor_[Source:RefSeq_peptide;Acc:NP_001025911]	-5457.66	-5275.61	1	3.59864e-81	3.54466e-78
ENSGALG00000004320_ENSGALT00000006879	FAT2	FAT_atypical_cadherin_2_[Source:HGNC_Symbol;Acc:HGNC:3596]	-30741.7	-30562.1	1	4.0455e-80	3.41556e-77
ENSGALG00000017132_ENSGALT00000027676	XPO4	exportin-4_[Source:RefSeq_peptide;Acc:NP_001012965]	-6745.42	-6569.15	1	1.18026e-78	8.71916e-76
ENSGALG00000037872_ENSGALT00000069055			-5452.48	-5293.73	1	5.09315e-71	3.3445e-68
ENSGALG00000014869_ENSGALT00000061210	NNT	nicotinamide_nucleotide_transhydrogenase_[Source:HGNC_Symbol;Acc:HGNC:7863]	-7681.33	-7525.31	1	7.82097e-70	4.62219e-67
ENSGALG00000004192_ENSGALT00000006663	SLTM	SAFB-like,_transcription_modulator_[Source:HGNC_Symbol;Acc:HGNC:20709]	-6190.9	-6041.45	1	5.72613e-67	3.0765e-64
ENSGALG00000014233_ENSGALT00000023014	FBLN1	fibulin-1_precursor_[Source:RefSeq_peptide;Acc:NP_989496]	-5217.79	-5070.41	1	4.60069e-66	2.26584e-63
ENSGALG00000007332_ENSGALT00000011865	PRICKLE2	prickle_homolog_2_[Source:HGNC_Symbol;Acc:HGNC:20340]	-6763.22	-6621.44	1	1.25515e-63	5.70609e-61
ENSGALG00000012619_ENSGALT00000020600	PRDM4	PR_domain_containing_4_[Source:HGNC_Symbol;Acc:HGNC:9348]	-5942.6	-5805.06	1	8.83071e-62	3.72782e-59
ENSGALG00000010049_ENSGALT00000067809	PTPRB	protein_tyrosine_phosphatase,_receptor_type,_B_[Source:HGNC_Symbol;Acc:HGNC:9665]	-13011.4	-12876.5	1	1.30165e-60	5.12852e-58
ENSGALG00000031495_ENSGALT00000071221			-16446.9	-16315.9	1	6.30337e-59	2.32831e-56
ENSGALG00000007839_ENSGALT00000047809	NCAM1	neural_cell_adhesion_molecule_1_isoform_1_precursor_[Source:RefSeq_peptide;Acc:NP_001122300]	-7848.29	-7721.16	1	3.08241e-57	1.07159e-54
ENSGALG00000015593_ENSGALT00000025144	EPHA7	Ephrin_type-A_receptor_7_[Source:UniProtKB/Swiss-Prot;Acc:O42422]	-5526.1	-5407.54	1	1.66337e-53	5.4614e-51
ENSGALG00000013143_ENSGALT00000037438	PDE3A	phosphodiesterase_3A_[Source:HGNC_Symbol;Acc:HGNC:8778]	-5831.89	-5715.86	1	2.12247e-52	6.60199e-50
ENSGALG00000034610_ENSGALT00000079624			-10361.1	-10245.6	1	3.67377e-52	1.0856e-49
ENSGALG00000029672_ENSGALT00000051888			-4809.28	-4694.35	1	6.38908e-52	1.79807e-49
ENSGALG00000011300_ENSGALT00000018432	TOP2B	DNA_topoisomerase_2-beta_[Source:RefSeq_peptide;Acc:NP_990413]	-9850.96	-9736.79	1	1.36311e-51	3.66181e-49
ENSGALG00000002053_ENSGALT00000003192	POR	NADPH--cytochrome_P450_reductase_[Source:RefSeq_peptide;Acc:NP_001182725]	-4466.87	-4355.05	1	1.45635e-50	3.74218e-48
ENSGALG00000043826_ENSGALT00000064801			-3960.79	-3849.71	1	3.05111e-50	7.51335e-48
ENSGALG00000032305_ENSGALT00000077131			-7361.48	-7254.86	1	2.71033e-48	6.40721e-46
ENSGALG00000015397_ENSGALT00000024838	FNTA	farnesyltransferase,_CAAX_box,_alpha_[Source:HGNC_Symbol;Acc:HGNC:3782]	-2468.93	-2362.97	1	5.26801e-48	1.19746e-45
ENSGALG00000013138_ENSGALT00000021448	TMEM245	transmembrane_protein_245_[Source:HGNC_Symbol;Acc:HGNC:1363]	-4425.63	-4319.96	1	6.94862e-48	1.52098e-45
ENSGALG00000040087_ENSGALT00000050706			-8071.57	-7966.86	1	1.83346e-47	3.86991e-45
ENSGALG00000030076_ENSGALT00000046722			-6033.43	-5929.75	1	5.13551e-47	1.04658e-44
ENSGALG00000011224_ENSGALT00000018302	SLC4A3	solute_carrier_family_4_(anion_exchanger),_member_3_[Source:HGNC_Symbol;Acc:HGNC:11029]	-7268.53	-7164.99	1	5.92368e-47	1.16696e-44
ENSGALG00000034383_ENSGALT00000073490			-3889.27	-3786.24	1	9.93861e-47	1.89475e-44
ENSGALG00000004728_ENSGALT00000007530	RGL1	ral_guanine_nucleotide_dissociation_stimulator-like_1_[Source:RefSeq_peptide;Acc:NP_001026442]	-5836.12	-5734.58	1	4.41863e-46	8.16067e-44
ENSGALG00000039169_ENSGALT00000068346			-5304.2	-5204.84	1	3.95665e-45	7.086e-43
ENSGALG00000015705_ENSGALT00000025327	WHSC1	Wolf-Hirschhorn_syndrome_candidate_1_[Source:HGNC_Symbol;Acc:HGNC:12766]	-8462.92	-8363.84	1	5.26625e-45	9.15397e-43
ENSGALG00000006426_ENSGALT00000074426	PAK2	p21_protein_(Cdc42/Rac)-activated_kinase_2_[Source:HGNC_Symbol;Acc:HGNC:8591]	-3446.75	-3349.48	1	3.25035e-44	5.48846e-42
ENSGALG00000040089_ENSGALT00000082756			-7268.5	-7173.25	1	2.45721e-43	4.03392e-41
ENSGALG00000003304_ENSGALT00000005236	CRTC1	CREB_regulated_transcription_coactivator_1_[Source:HGNC_Symbol;Acc:HGNC:16062]	-4511.05	-4416.93	1	7.71972e-43	1.23307e-40
ENSGALG00000015418_ENSGALT00000074036	EPHA6	EPH_receptor_A6_[Source:HGNC_Symbol;Acc:HGNC:19296]	-5007.52	-4917.05	1	3.03951e-41	4.72723e-39
ENSGALG00000032840_ENSGALT00000058745			-15662.7	-15573.4	1	9.72167e-41	1.47321e-38
ENSGALG00000006672_ENSGALT00000071641	LARP4B	La_ribonucleoprotein_domain_family_member_4B_[Source:HGNC_Symbol;Acc:HGNC:28987]	-4452.48	-4365.94	1	1.55878e-39	2.3031e-37
ENSGALG00000005869_ENSGALT00000009434	COPG1	coatomer_subunit_gamma_[Source:RefSeq_peptide;Acc:NP_001025768]	-5516.54	-5431.75	1	9.11148e-39	1.31339e-36
ENSGALG00000037675_ENSGALT00000077854			-12578.9	-12494.7	1	1.53786e-38	2.16399e-36
ENSGALG00000015006_ENSGALT00000052620	MAB21L3	mab-21-like_3_(C._elegans)_[Source:HGNC_Symbol;Acc:HGNC:26787]	-2544.57	-2460.38	1	1.67479e-38	2.29504e-36
ENSGALG00000029842_ENSGALT00000070804			-3896.43	-3812.26	1	1.70866e-38	2.29504e-36
ENSGALG00000040266_ENSGALT00000056531			-9753.92	-9669.98	1	2.13445e-38	2.80324e-36
ENSGALG00000002880_ENSGALT00000004541	description:Uncharacterized	Uncharacterized_protein_[Source:UniProtKB/TrEMBL;Acc:F1NC49]	-3297.74	-3214.14	1	3.0042e-38	3.85975e-36
ENSGALG00000041791_ENSGALT00000070390			-5022.18	-4938.72	1	3.51357e-38	4.41813e-36
ENSGALG00000033500_ENSGALT00000070690			-6243.78	-6163	1	5.16199e-37	6.3557e-35
ENSGALG00000037443_ENSGALT00000071423			-4544.8	-4465.75	1	2.93472e-36	3.53963e-34
ENSGALG00000001944_ENSGALT00000003009	TBC1D2	TBC1_domain_family_member_2_[Source:HGNC_Symbol;Acc:HGNC:18026]	-7080.05	-7001.34	1	4.16112e-36	4.91845e-34
ENSGALG00000005688_ENSGALT00000036253	DNASE1L3	deoxyribonuclease_gamma_precursor_[Source:RefSeq_peptide;Acc:NP_001029987]	-2646.18	-2567.51	1	4.32854e-36	5.01602e-34
ENSGALG00000012144_ENSGALT00000019837	MIEF1	mitochondrial_elongation_factor_1_[Source:HGNC_Symbol;Acc:HGNC:25979]	-3225.33	-3147.84	1	1.42681e-35	1.62163e-33
ENSGALG00000006038_ENSGALT00000033354	TGFBR3	transforming_growth_factor_beta_receptor_type_3_precursor_[Source:RefSeq_peptide;Acc:NP_989670]	-6231.15	-6153.81	1	1.6412e-35	1.8301e-33
ENSGALG00000005802_ENSGALT00000009188	FLT4	fms-related_tyrosine_kinase_4_[Source:HGNC_Symbol;Acc:HGNC:3767]	-4846.23	-4769.8	1	4.09952e-35	4.4867e-33
ENSGALG00000033772_ENSGALT00000070595			-7612.48	-7537.12	1	1.20025e-34	1.28972e-32
ENSGALG00000041687_ENSGALT00000079882			-6471.93	-6397.21	1	2.30827e-34	2.43605e-32
ENSGALG00000005070_ENSGALT00000052471	AP3M1	AP-3_complex_subunit_mu-1_[Source:RefSeq_peptide;Acc:NP_001026398]	-2975.48	-2901.63	1	5.53378e-34	5.73765e-32
ENSGALG00000001973_ENSGALT00000003067	GNL2	guanine_nucleotide_binding_protein-like_2_(nucleolar)_[Source:HGNC_Symbol;Acc:HGNC:29925]	-5578.18	-5506.01	1	3.00823e-33	3.06528e-31
ENSGALG00000031474_ENSGALT00000051177			-4836.03	-4764.36	1	4.9165e-33	4.92484e-31
ENSGALG00000033789_ENSGALT00000081140			-4886.65	-4816.2	1	1.69664e-32	1.67119e-30
ENSGALG00000015001_ENSGALT00000024193	LAMA4	laminin_subunit_alpha_4_[Source:HGNC_Symbol;Acc:HGNC:6484]	-7612.98	-7542.84	1	2.31688e-32	2.24471e-30
ENSGALG00000016549_ENSGALT00000026701	CTPS2	CTP_synthase_2_[Source:UniProtKB/Swiss-Prot;Acc:Q5F3Z1]	-3842.33	-3772.43	1	2.93549e-32	2.79819e-30
ENSGALG00000006013_ENSGALT00000076756	description:Uncharacterized	Uncharacterized_protein_[Source:UniProtKB/TrEMBL;Acc:F1N9L2]	-4231.01	-4161.43	1	4.05783e-32	3.80663e-30
ENSGALG00000016713_ENSGALT00000026970	PLA2G7	platelet-activating_factor_acetylhydrolase_precursor_[Source:RefSeq_peptide;Acc:NP_990300]	-2809.65	-2741.2	1	1.26852e-31	1.1714e-29
ENSGALG00000005509_ENSGALT00000008842	DPYD	dihydropyrimidine_dehydrogenase_[Source:HGNC_Symbol;Acc:HGNC:3012]	-5592.71	-5525.18	1	3.22608e-31	2.93325e-29
ENSGALG00000002886_ENSGALT00000004551	NKX2-5	homeobox_protein_Nkx-2.5_[Source:RefSeq_peptide;Acc:NP_990495]	-2139.41	-2072.36	1	5.19099e-31	4.6483e-29
ENSGALG00000001968_ENSGALT00000003058	SYT6	synaptotagmin_6_[Source:HGNC_Symbol;Acc:HGNC:18638]	-3244.04	-3177.44	1	8.19453e-31	7.22831e-29
ENSGALG00000008551_ENSGALT00000013929	CRELD2	cysteine-rich_with_EGF-like_domain_protein_2_precursor_[Source:RefSeq_peptide;Acc:NP_001186426]	-2304.73	-2238.5	1	1.18459e-30	1.02955e-28
ENSGALG00000034806_ENSGALT00000082248			-3448.7	-3382.61	1	1.36416e-30	1.16843e-28
ENSGALG00000012454_ENSGALT00000082209	CYTH4	cytohesin-4_[Source:RefSeq_peptide;Acc:NP_001012833]	-2779.12	-2713.83	1	3.05919e-30	2.58283e-28
ENSGALG00000006873_ENSGALT00000011134	RASSF7	Ras_association_(RalGDS/AF-6)_domain_family_(N-terminal)_member_7_[Source:HGNC_Symbol;Acc:HGNC:1166]	-3268.15	-3203.09	1	3.82295e-30	3.1822e-28
ENSGALG00000004553_ENSGALT00000007247	SGPL1	sphingosine-1-phosphate_lyase_1_[Source:RefSeq_peptide;Acc:NP_001007947]	-4157.97	-4092.94	1	3.95778e-30	3.24868e-28
ENSGALG00000038853_ENSGALT00000049307			-4951.68	-4886.9	1	5.14414e-30	4.16464e-28
ENSGALG00000020615_ENSGALT00000032966	STK32C	serine/threonine_kinase_32C_[Source:HGNC_Symbol;Acc:HGNC:21332]	-2634.41	-2570.26	1	9.66139e-30	7.71605e-28
ENSGALG00000011427_ENSGALT00000038204			-6653.38	-6589.84	1	1.78776e-29	1.40875e-27
ENSGALG00000000374_ENSGALT00000000507	RNPEP	arginyl_aminopeptidase_(aminopeptidase_B)_[Source:HGNC_Symbol;Acc:HGNC:10078]	-3325.25	-3262.4	1	3.5698e-29	2.77599e-27
ENSGALG00000014170_ENSGALT00000022919	description:Uncharacterized	Uncharacterized_protein_[Source:UniProtKB/TrEMBL;Acc:F1NZ99]	-2233.76	-2171.24	1	4.97184e-29	3.77359e-27
ENSGALG00000002546_ENSGALT00000059123	COL5A1	collagen_alpha-1(V)_chain_precursor_[Source:RefSeq_peptide;Acc:NP_990121]	-10122	-10059.4	1	4.98037e-29	3.77359e-27
ENSGALG00000010811_ENSGALT00000017577	LGMN	legumain_[Source:HGNC_Symbol;Acc:HGNC:9472]	-3125.41	-3065.43	1	6.48035e-28	4.84796e-26
ENSGALG00000011990_ENSGALT00000019558	USP53	ubiquitin_specific_peptidase_53_[Source:HGNC_Symbol;Acc:HGNC:29255]	-5214.23	-5154.71	1	1.03314e-27	7.63229e-26
ENSGALG00000008684_ENSGALT00000069706	EIF4A2	Eukaryotic_initiation_factor_4A-II_[Source:UniProtKB/Swiss-Prot;Acc:Q8JFP1]	-2363.97	-2306.16	1	5.77599e-27	4.21434e-25
ENSGALG00000006097_ENSGALT00000036246	PLXNA1	plexin_A1_[Source:HGNC_Symbol;Acc:HGNC:9099]	-8565.57	-8509.19	1	2.43786e-26	1.75704e-24
ENSGALG00000015248_ENSGALT00000048577	SNTG1	syntrophin,_gamma_1_[Source:HGNC_Symbol;Acc:HGNC:13740]	-3147.42	-3091.14	1	2.71188e-26	1.93099e-24
ENSGALG00000004446_ENSGALT00000007077	NPFF1	neuropeptide_FF_receptor_1_[Source:RefSeq_peptide;Acc:NP_989693]	-2818.51	-2763.25	1	7.58158e-26	5.33418e-24
ENSGALG00000038637_ENSGALT00000068656			-1942.04	-1887.47	1	1.52091e-25	1.05748e-23
ENSGALG00000014939_ENSGALT00000024097	GFM2	G_elongation_factor,_mitochondrial_2_[Source:HGNC_Symbol;Acc:HGNC:29682]	-6168.62	-6114.09	1	1.56686e-25	1.07676e-23
ENSGALG00000012978_ENSGALT00000021177	CDYL2	chromodomain_protein,_Y-like_2_[Source:HGNC_Symbol;Acc:HGNC:23030]	-3164.01	-3110.43	1	4.10766e-25	2.79038e-23
ENSGALG00000010221_ENSGALT00000016617	ZSWIM5	zinc_finger,_SWIM-type_containing_5_[Source:HGNC_Symbol;Acc:HGNC:29299]	-5750.25	-5697.91	1	1.43051e-24	9.60717e-23
ENSGALG00000011689_ENSGALT00000019110	PDIA5	protein_disulfide_isomerase_family_A_member_5_[Source:HGNC_Symbol;Acc:HGNC:24811]	-2905.49	-2853.2	1	1.51385e-24	1.00526e-22
ENSGALG00000038145_ENSGALT00000076895			-3456.37	-3406.17	1	1.24227e-23	8.15755e-22
ENSGALG00000006867_ENSGALT00000071796	QRICH1	glutamine-rich_1_[Source:HGNC_Symbol;Acc:HGNC:24713]	-4520.21	-4470.1	1	1.35771e-23	8.81764e-22
ENSGALG00000003298_ENSGALT00000005224	DDX55	ATP-dependent_RNA_helicase_DDX55_[Source:RefSeq_peptide;Acc:NP_001006185]	-4230.63	-4181.63	1	4.18552e-23	2.68874e-21
ENSGALG00000004613_ENSGALT00000007345	P2RX5	P2X_purinoceptor_5_[Source:RefSeq_peptide;Acc:NP_990079]	-2969.62	-2920.65	1	4.28778e-23	2.72482e-21
ENSGALG00000008838_ENSGALT00000014359	FKBP15	FK506_binding_protein_15_[Source:HGNC_Symbol;Acc:HGNC:23397]	-6609.31	-6560.67	1	6.03556e-23	3.7947e-21
ENSGALG00000004472_ENSGALT00000007121	ASTN1	astrotactin_1_[Source:HGNC_Symbol;Acc:HGNC:773]	-4883.21	-4834.82	1	7.71156e-23	4.7974e-21
ENSGALG00000039855_ENSGALT00000071795			-2590.59	-2542.35	1	9.08263e-23	5.5915e-21
ENSGALG00000041473_ENSGALT00000054949			-4062.9	-4015.15	1	1.47891e-22	9.0107e-21
ENSGALG00000012546_ENSGALT00000020490	MCM5	DNA_replication_licensing_factor_MCM5_[Source:RefSeq_peptide;Acc:NP_001006243]	-4753.7	-4706.23	1	1.95393e-22	1.17834e-20
ENSGALG00000015254_ENSGALT00000075015	ST18	suppression_of_tumorigenicity_18,_zinc_finger_[Source:HGNC_Symbol;Acc:HGNC:18695]	-6634.16	-6587.15	1	3.12099e-22	1.86314e-20
ENSGALG00000000498_ENSGALT00000040528	ACE	angiotensin-converting_enzyme_precursor_[Source:RefSeq_peptide;Acc:NP_001161204]	-8013.47	-7966.51	1	3.28438e-22	1.94107e-20
ENSGALG00000028041_ENSGALT00000046087	DKK2	dickkopf_WNT_signaling_pathway_inhibitor_2_[Source:HGNC_Symbol;Acc:HGNC:2892]	-1583.12	-1536.27	1	3.66494e-22	2.14453e-20
ENSGALG00000004955_ENSGALT00000007945	SYN2	synapsin_II_[Source:HGNC_Symbol;Acc:HGNC:11495]	-2195.18	-2148.72	1	5.44955e-22	3.15753e-20
ENSGALG00000009438_ENSGALT00000015368	SLC39A9	Zinc_transporter_ZIP9_[Source:UniProtKB/Swiss-Prot;Acc:Q5ZIU9]	-2073.62	-2028.07	1	1.36536e-21	7.83428e-20
ENSGALG00000007702_ENSGALT00000012479	XYLT2	xylosyltransferase_2_[Source:RefSeq_peptide;Acc:NP_001001785]	-4305.89	-4260.39	1	1.43483e-21	8.15372e-20
ENSGALG00000010748_ENSGALT00000017486	EXO1	exonuclease_1_[Source:HGNC_Symbol;Acc:HGNC:3511]	-6567.46	-6522.33	1	2.10741e-21	1.18617e-19
ENSGALG00000006681_ENSGALT00000010803	BRSK2	BR_serine/threonine-protein_kinase_2_[Source:RefSeq_peptide;Acc:NP_001186525]	-3529.52	-3484.8	1	3.13662e-21	1.74881e-19
ENSGALG00000007140_ENSGALT00000011564	NRP1	neuropilin-1_precursor_[Source:RefSeq_peptide;Acc:NP_990113]	-5337.88	-5293.55	1	4.69705e-21	2.59435e-19
ENSGALG00000013576_ENSGALT00000022097	Mel1a	Melatonin_receptor_type_1A_[Source:UniProtKB/Swiss-Prot;Acc:P49285]	-2362	-2318.03	1	6.72864e-21	3.68206e-19
ENSGALG00000016941_ENSGALT00000027383	PCDH17	protocadherin_17_[Source:HGNC_Symbol;Acc:HGNC:14267]	-6982.07	-6938.76	1	1.3167e-20	7.13918e-19
ENSGALG00000006368_ENSGALT00000010293	PTPN5	protein_tyrosine_phosphatase,_non-receptor_type_5_(striatum-enriched)_[Source:HGNC_Symbol;Acc:HGNC:9657]	-3747.65	-3704.38	1	1.36607e-20	7.33954e-19
ENSGALG00000016278_ENSGALT00000026244	PRIM2	DNA_primase_large_subunit_[Source:RefSeq_peptide;Acc:NP_001012898]	-4096.95	-4055.45	1	8.23028e-20	4.38207e-18
ENSGALG00000009682_ENSGALT00000015759	VEPH1	ventricular_zone_expressed_PH_domain_containing_1_[Source:HGNC_Symbol;Acc:HGNC:25735]	-5488.7	-5447.55	1	1.16273e-19	6.13549e-18
ENSGALG00000004398_ENSGALT00000007013	CARD11	caspase_recruitment_domain-containing_protein_11_[Source:RefSeq_peptide;Acc:NP_001006161]	-7906.38	-7865.37	1	1.34853e-19	7.05293e-18
ENSGALG00000033278_ENSGALT00000073576			-8103.31	-8063.21	1	3.38299e-19	1.75381e-17
ENSGALG00000007008_ENSGALT00000011343	POLR3E	polymerase_(RNA)_III_(DNA_directed)_polypeptide_E_(80kD)_[Source:HGNC_Symbol;Acc:HGNC:30347]	-4058.38	-4018.8	1	5.67299e-19	2.91542e-17
ENSGALG00000016191_ENSGALT00000050498	PKNOX1	PBX/knotted_1_homeobox_1_[Source:HGNC_Symbol;Acc:HGNC:9022]	-2592.08	-2553.37	1	1.37748e-18	7.018e-17
ENSGALG00000016267_ENSGALT00000078001	PHF3	PHD_finger_protein_3_[Source:HGNC_Symbol;Acc:HGNC:8921]	-14856.2	-14817.5	1	1.42703e-18	7.20831e-17
ENSGALG00000002350_ENSGALT00000003708	DNAH3	dynein,_axonemal,_heavy_chain_3_[Source:HGNC_Symbol;Acc:HGNC:2949]	-32652.6	-32614	1	1.52242e-18	7.62498e-17
ENSGALG00000003563_ENSGALT00000005643	YARS	tyrosine--tRNA_ligase,_cytoplasmic_[Source:RefSeq_peptide;Acc:NP_001006314]	-3972.7	-3934.24	1	1.76786e-18	8.77985e-17
ENSGALG00000007141_ENSGALT00000011565	LRRK1	leucine-rich_repeat_kinase_1_[Source:HGNC_Symbol;Acc:HGNC:18608]	-10236.5	-10198.3	1	2.257e-18	1.11157e-16
ENSGALG00000010576_ENSGALT00000017211	GTF2A1	transcription_initiation_factor_IIA_subunit_1_[Source:RefSeq_peptide;Acc:NP_001026378]	-1915.34	-1877.32	1	2.78766e-18	1.36158e-16
ENSGALG00000005974_ENSGALT00000039669	COL6A1	collagen_alpha-1(VI)_chain_precursor_[Source:RefSeq_peptide;Acc:NP_990438]	-7379.4	-7341.63	1	3.58987e-18	1.73903e-16
ENSGALG00000007174_ENSGALT00000040053	ChTL1A	tumor_necrosis_factor_ligand_superfamily_member_15_[Source:RefSeq_peptide;Acc:NP_001019749]	-2231.58	-2193.86	1	3.76071e-18	1.80698e-16
ENSGALG00000031578_ENSGALT00000055882			-18644.8	-18607.2	1	4.02154e-18	1.91672e-16
ENSGALG00000038097_ENSGALT00000050519			-2385.46	-2347.9	1	4.42912e-18	2.09409e-16
ENSGALG00000008127_ENSGALT00000057017	SPI1	transcription_factor_PU.1_[Source:RefSeq_peptide;Acc:NP_990354]	-1736.23	-1698.71	1	4.60573e-18	2.16031e-16
ENSGALG00000006225_ENSGALT00000038669	EFTUD1	elongation_factor_Tu_GTP-binding_domain-containing_protein_1_[Source:RefSeq_peptide;Acc:NP_001034345]	-7672.02	-7634.79	1	6.1324e-18	2.85374e-16
ENSGALG00000037136_ENSGALT00000074158			-4057.98	-4020.9	1	7.1664e-18	3.30886e-16
ENSGALG00000015419_ENSGALT00000024871	PENK	proenkephalin_[Source:HGNC_Symbol;Acc:HGNC:8831]	-2032.59	-1995.64	1	8.18357e-18	3.74921e-16
ENSGALG00000012681_ENSGALT00000020690	MBOAT1	membrane_bound_O-acyltransferase_domain_containing_1_[Source:HGNC_Symbol;Acc:HGNC:21579]	-3076.84	-3041.32	1	3.49134e-17	1.58722e-15
ENSGALG00000007904_ENSGALT00000012830	DLAT	dihydrolipoamide_S-acetyltransferase_[Source:HGNC_Symbol;Acc:HGNC:2896]	-3714.31	-3679.22	1	5.42534e-17	2.44761e-15
ENSGALG00000014740_ENSGALT00000048312	IPO11	importin_11_[Source:HGNC_Symbol;Acc:HGNC:20628]	-7682.56	-7647.65	1	6.49378e-17	2.90744e-15
ENSGALG00000011934_ENSGALT00000019464	DESI1	desumoylating_isopeptidase_1_[Source:HGNC_Symbol;Acc:HGNC:24577]	-1004.2	-969.502	1	8.01282e-17	3.56059e-15
ENSGALG00000010109_ENSGALT00000033170	RNF220	chromosome_1_open_reading_frame_164_isoform_2_[Source:RefSeq_peptide;Acc:NP_001103457]	-3615.16	-3580.52	1	8.52671e-17	3.76066e-15
ENSGALG00000009626_ENSGALT00000015678	THBS1	thrombospondin-1_precursor_[Source:RefSeq_peptide;Acc:NP_001186382]	-6823.66	-6789.18	1	1.00084e-16	4.38147e-15
ENSGALG00000004675_ENSGALT00000007450	RGS9BP	Regulator_of_G-protein_signaling_9-binding_protein_[Source:UniProtKB/Swiss-Prot;Acc:Q6XK22]	-1508.81	-1474.36	1	1.02977e-16	4.47497e-15
ENSGALG00000036836_ENSGALT00000080778			-1570.31	-1535.89	1	1.06115e-16	4.57768e-15
ENSGALG00000011494_ENSGALT00000018731	CNOT10	CCR4-NOT_transcription_complex_subunit_10_[Source:UniProtKB/Swiss-Prot;Acc:Q5ZIW2]	-4640.68	-4606.27	1	1.08356e-16	4.64045e-15
ENSGALG00000009916_ENSGALT00000016127	SCFD1	sec1_family_domain-containing_protein_1_[Source:RefSeq_peptide;Acc:NP_001186643]	-3357.43	-3323.28	1	1.40978e-16	5.99408e-15
ENSGALG00000012569_ENSGALT00000020524	FBXO7	F-box_only_protein_7_[Source:RefSeq_peptide;Acc:NP_001012555]	-2694.21	-2660.15	1	1.54217e-16	6.51017e-15
ENSGALG00000033834_ENSGALT00000061383			-2995.85	-2961.97	1	1.84695e-16	7.74149e-15
ENSGALG00000029980_ENSGALT00000079152			-4219.81	-4185.99	1	1.96744e-16	8.18842e-15
ENSGALG00000041993_ENSGALT00000067097			-3404.52	-3370.83	1	2.2341e-16	9.23323e-15
ENSGALG00000006141_ENSGALT00000009916	FUT13	Uncharacterized_protein_[Source:UniProtKB/TrEMBL;Acc:F6UZB4]	-2692.22	-2659.02	1	3.70425e-16	1.52029e-14
ENSGALG00000039209_ENSGALT00000063712			-2096.25	-2063.14	1	4.033e-16	1.64379e-14
ENSGALG00000009725_ENSGALT00000015828	SCG5	secretogranin_V_[Source:HGNC_Symbol;Acc:HGNC:10816]	-1709.81	-1676.88	1	4.79717e-16	1.94187e-14
ENSGALG00000008418_ENSGALT00000038363	GYLTL1B	glycosyltransferase-like_protein_LARGE2_[Source:RefSeq_peptide;Acc:NP_001004404]	-4689.45	-4657.23	1	1.00156e-15	4.02666e-14
ENSGALG00000006418_ENSGALT00000010359	PDPK1	3-phosphoinositide-dependent_protein_kinase_1_[Source:RefSeq_peptide;Acc:NP_001012547]	-3195	-3162.82	1	1.03525e-15	4.13402e-14
ENSGALG00000002283_ENSGALT00000076327	MAPKAPK3	mitogen-activated_protein_kinase-activated_protein_kinase_3_[Source:HGNC_Symbol;Acc:HGNC:6888]	-2189.96	-2158.24	1	1.65932e-15	6.5816e-14
ENSGALG00000003816_ENSGALT00000006051	NT5C1A	5'-nucleotidase,_cytosolic_IA_[Source:HGNC_Symbol;Acc:HGNC:17819]	-2173.22	-2141.73	1	2.08795e-15	8.22652e-14
ENSGALG00000002682_ENSGALT00000004226	BRD3	bromodomain_containing_3_[Source:HGNC_Symbol;Acc:HGNC:1104]	-5139.23	-5108.11	1	3.02601e-15	1.18435e-13
ENSGALG00000015544_ENSGALT00000037630	ALDOB	Fructose-bisphosphate_aldolase_B_[Source:UniProtKB/Swiss-Prot;Acc:P07341]	-2554.2	-2523.17	1	3.34472e-15	1.30048e-13
ENSGALG00000037371_ENSGALT00000055160			-1043.79	-1012.89	1	3.82498e-15	1.47749e-13
ENSGALG00000035839_ENSGALT00000051504			-2819.12	-2788.57	1	5.44248e-15	2.08864e-13
ENSGALG00000042452_ENSGALT00000074535			-5652.87	-5622.44	1	6.13624e-15	2.33969e-13
ENSGALG00000010708_ENSGALT00000017422	ICA1	islet_cell_autoantigen_1_[Source:HGNC_Symbol;Acc:HGNC:5343]	-3334.99	-3304.76	1	7.54484e-15	2.85833e-13
ENSGALG00000012898_ENSGALT00000021033	KIAA1468	KIAA1468_[Source:HGNC_Symbol;Acc:HGNC:29289]	-5237.93	-5207.72	1	7.61105e-15	2.86505e-13
ENSGALG00000000407_ENSGALT00000000555	description:Uncharacterized	Uncharacterized_protein_[Source:UniProtKB/TrEMBL;Acc:F1NRY9]	-3897.13	-3866.95	1	7.95095e-15	2.97406e-13
ENSGALG00000016676_ENSGALT00000026909	MCM3	DNA_replication_licensing_factor_MCM3_[Source:RefSeq_peptide;Acc:NP_001006421]	-5641.53	-5611.66	1	1.0875e-14	4.04222e-13
ENSGALG00000002447_ENSGALT00000073093	CTNNA1	catenin_alpha_1_[Source:HGNC_Symbol;Acc:HGNC:2509]	-5869.19	-5839.39	1	1.16982e-14	4.31737e-13
ENSGALG00000004740_ENSGALT00000007552	TMOD2	tropomodulin_2_[Source:HGNC_Symbol;Acc:HGNC:11872]	-2187.51	-2157.73	1	1.17614e-14	4.31737e-13
ENSGALG00000001662_ENSGALT00000002539	ATP10B	ATPase,_class_V,_type_10B_[Source:HGNC_Symbol;Acc:HGNC:13543]	-11560.2	-11530.8	1	1.66196e-14	6.06308e-13
ENSGALG00000010899_ENSGALT00000017723	G6PC2	glucose-6-phosphatase,_catalytic,_2_[Source:HGNC_Symbol;Acc:HGNC:28906]	-1970.22	-1941.18	1	2.50702e-14	9.08986e-13
ENSGALG00000043092_ENSGALT00000046939			-11158.1	-11129.2	1	3.05396e-14	1.10054e-12
ENSGALG00000039705_ENSGALT00000049899			-4061.66	-4033.2	1	4.52063e-14	1.61921e-12
ENSGALG00000015045_ENSGALT00000024261	description:Uncharacterized	Uncharacterized_protein_[Source:UniProtKB/TrEMBL;Acc:E1BZT7]	-2343.52	-2315.66	1	8.34279e-14	2.97023e-12
ENSGALG00000015309_ENSGALT00000024711	SCML4	sex_comb_on_midleg-like_4_(Drosophila)_[Source:HGNC_Symbol;Acc:HGNC:21397]	-3479.67	-3451.93	1	9.42995e-14	3.33719e-12
ENSGALG00000009846_ENSGALT00000016007	BBS5	Bardet-Biedl_syndrome_5_protein_[Source:RefSeq_peptide;Acc:NP_001238960]	-1811.25	-1783.74	1	1.19882e-13	4.19359e-12
ENSGALG00000035282_ENSGALT00000053800			-1249.44	-1221.94	1	1.19918e-13	4.19359e-12
ENSGALG00000003365_ENSGALT00000049619	RAD1	RAD1_checkpoint_DNA_exonuclease_[Source:HGNC_Symbol;Acc:HGNC:9806]	-2375.88	-2348.41	1	1.24102e-13	4.31436e-12
ENSGALG00000031440_ENSGALT00000075185			-8922.67	-8895.33	1	1.41108e-13	4.8769e-12
ENSGALG00000003318_ENSGALT00000005257	SNRNP35	U11/U12_small_nuclear_ribonucleoprotein_35_kDa_protein_[Source:RefSeq_peptide;Acc:NP_001264104]	-1806.08	-1778.8	1	1.49673e-13	5.14282e-12
ENSGALG00000042548_ENSGALT00000046977			-3511.08	-3483.85	1	1.59194e-13	5.43837e-12
ENSGALG00000011118_ENSGALT00000043913	MIER1	mesoderm_induction_early_response_protein_1_[Source:RefSeq_peptide;Acc:NP_001026463]	-3013.72	-2986.71	1	1.98439e-13	6.74008e-12
ENSGALG00000010117_ENSGALT00000016457	SLC25A21	solute_carrier_family_25_(mitochondrial_oxoadipate_carrier),_member_21_[Source:HGNC_Symbol;Acc:HGNC:14411]	-1550.43	-1523.52	1	2.19613e-13	7.41664e-12
ENSGALG00000037387_ENSGALT00000068250			-3808.06	-3781.21	1	2.33207e-13	7.83098e-12
ENSGALG00000002470_ENSGALT00000003899	CYP27A1	cytochrome_P450_family_27_subfamily_A_member_1_[Source:HGNC_Symbol;Acc:HGNC:2605]	-2674	-2647.25	1	2.57673e-13	8.60366e-12
ENSGALG00000012218_ENSGALT00000019954	CBY1	protein_chibby_homolog_1_[Source:RefSeq_peptide;Acc:NP_001265078]	-1004.82	-978.21	1	2.98785e-13	9.92032e-12
ENSGALG00000008335_ENSGALT00000013567	PHTF2	putative_homeodomain_transcription_factor_2_[Source:RefSeq_peptide;Acc:NP_001006226]	-4655.66	-4629.2	1	3.46672e-13	1.1446e-11
ENSGALG00000014799_ENSGALT00000023894	METTL4	methyltransferase_like_4_[Source:HGNC_Symbol;Acc:HGNC:24726]	-3900.14	-3873.68	1	3.49294e-13	1.14685e-11
ENSGALG00000029983_ENSGALT00000057472			-1987.86	-1961.62	1	4.34298e-13	1.41807e-11
ENSGALG00000001167_ENSGALT00000001767	KCNJ1	potassium_channel,_inwardly_rectifying_subfamily_J,_member_1_[Source:HGNC_Symbol;Acc:HGNC:6255]	-2741.01	-2714.82	1	4.57312e-13	1.48501e-11
ENSGALG00000037962_ENSGALT00000047798			-2306.88	-2281.31	1	8.58151e-13	2.77141e-11
ENSGALG00000008274_ENSGALT00000013466	CRBN	cereblon_[Source:HGNC_Symbol;Acc:HGNC:30185]	-3407.46	-3382.55	1	1.70105e-12	5.4637e-11
ENSGALG00000012000_ENSGALT00000019584	METTL14	N6-adenosine-methyltransferase_subunit_METTL14_[Source:UniProtKB/Swiss-Prot;Acc:Q5ZK35]	-2855.67	-2830.84	1	1.82482e-12	5.82956e-11
ENSGALG00000006856_ENSGALT00000039051	CD151	CD151_antigen_[Source:RefSeq_peptide;Acc:NP_001006472]	-1653.42	-1628.68	1	2.00445e-12	6.36899e-11
ENSGALG00000033379_ENSGALT00000065313			-1588.33	-1563.74	1	2.34928e-12	7.42475e-11
ENSGALG00000040131_ENSGALT00000062406			-3128.14	-3103.58	1	2.40429e-12	7.55818e-11
ENSGALG00000011762_ENSGALT00000019202	UBA6	ubiquitin-like_modifier_activating_enzyme_6_[Source:HGNC_Symbol;Acc:HGNC:25581]	-6304.19	-6279.9	1	3.16634e-12	9.9011e-11
ENSGALG00000008059_ENSGALT00000013083	ASCC2	activating_signal_cointegrator_1_complex_subunit_2_[Source:HGNC_Symbol;Acc:HGNC:24103]	-5663.78	-5639.58	1	3.48242e-12	1.08322e-10
ENSGALG00000006486_ENSGALT00000010484	RPP30	ribonuclease_P/MRP_30kDa_subunit_[Source:HGNC_Symbol;Acc:HGNC:17688]	-1517.84	-1493.85	1	4.29755e-12	1.32977e-10
ENSGALG00000039254_ENSGALT00000053407			-3292.7	-3268.98	1	5.6812e-12	1.74874e-10
ENSGALG00000005637_ENSGALT00000009044	GBF1	golgi_brefeldin_A_resistant_guanine_nucleotide_exchange_factor_1_[Source:HGNC_Symbol;Acc:HGNC:4181]	-12213.3	-12189.9	1	7.55769e-12	2.3143e-10
ENSGALG00000010795_ENSGALT00000017557	ISPD	isoprenoid_synthase_domain_containing_[Source:HGNC_Symbol;Acc:HGNC:37276]	-2472.19	-2448.79	1	7.84531e-12	2.38999e-10
ENSGALG00000003428_ENSGALT00000005424	description:Uncharacterized	Uncharacterized_protein_[Source:UniProtKB/TrEMBL;Acc:E1C2C5]	-4526.93	-4503.63	1	8.73807e-12	2.64831e-10
ENSGALG00000003242_ENSGALT00000005128	STAR	Steroidogenic_acute_regulatory_protein,_mitochondrial_[Source:UniProtKB/Swiss-Prot;Acc:Q9DG09]	-2134.75	-2111.68	1	1.09884e-11	3.31334e-10
ENSGALG00000011185_ENSGALT00000018238	PLEKHA8	pleckstrin_homology_domain_containing_A8_[Source:HGNC_Symbol;Acc:HGNC:30037]	-3476.59	-3453.77	1	1.41299e-11	4.23898e-10
ENSGALG00000017073_ENSGALT00000027576	BRCA2	breast_cancer_2,_early_onset_[Source:RefSeq_peptide;Acc:NP_989607]	-31155.9	-31133.2	1	1.58921e-11	4.74356e-10
ENSGALG00000007409_ENSGALT00000011985	SCN4B	sodium_channel,_voltage_gated,_type_IV_beta_subunit_[Source:HGNC_Symbol;Acc:HGNC:10592]	-1287.5	-1265.14	1	2.29118e-11	6.80447e-10
ENSGALG00000003851_ENSGALT00000006120	TRIT1	tRNA_isopentenyltransferase_1_[Source:HGNC_Symbol;Acc:HGNC:20286]	-2687.22	-2665.17	1	3.1183e-11	9.21457e-10
ENSGALG00000043415_ENSGALT00000059612			-2893.8	-2871.86	1	3.48996e-11	1.02615e-09
ENSGALG00000029678_ENSGALT00000071713			-2306.1	-2284.53	1	5.10431e-11	1.49339e-09
ENSGALG00000027192_ENSGALT00000043317	NTS	neurotensin/neuromedin_N_precursor_[Source:RefSeq_peptide;Acc:NP_001264289]	-842.342	-820.854	1	5.53929e-11	1.61267e-09
ENSGALG00000016391_ENSGALT00000061072	CNKSR2	connector_enhancer_of_kinase_suppressor_of_Ras_2_[Source:HGNC_Symbol;Acc:HGNC:19701]	-4140.23	-4118.83	1	6.09865e-11	1.76682e-09
ENSGALG00000037875_ENSGALT00000051328			-587.818	-567.521	1	1.87477e-10	5.40483e-09
ENSGALG00000004491_ENSGALT00000007151	DMGDH	dimethylglycine_dehydrogenase_[Source:HGNC_Symbol;Acc:HGNC:24475]	-3819.31	-3799.05	1	1.94335e-10	5.57534e-09
ENSGALG00000016568_ENSGALT00000026743	MOSPD2	motile_sperm_domain_containing_2_[Source:RefSeq_peptide;Acc:NP_001170988]	-2883.89	-2863.87	1	2.49147e-10	7.11332e-09
ENSGALG00000007664_ENSGALT00000072981	PSMD1	26S_proteasome_non-ATPase_regulatory_subunit_1_[Source:RefSeq_peptide;Acc:NP_001012618]	-5635.29	-5615.55	1	3.32218e-10	9.43947e-09
ENSGALG00000035667_ENSGALT00000055828			-5659.47	-5639.77	1	3.43006e-10	9.69935e-09
ENSGALG00000014692_ENSGALT00000023681	LMNB1	lamin-B1_[Source:RefSeq_peptide;Acc:NP_990617]	-3548.17	-3528.54	1	3.70318e-10	1.04218e-08
ENSGALG00000034380_ENSGALT00000060746			-2663.69	-2644.07	1	3.75821e-10	1.05265e-08
ENSGALG00000015017_ENSGALT00000024218	TUBE1	tubulin_epsilon_1_[Source:HGNC_Symbol;Acc:HGNC:20775]	-2853.53	-2834.04	1	4.27468e-10	1.19167e-08
ENSGALG00000016377_ENSGALT00000026413	PXDN	peroxidasin_[Source:HGNC_Symbol;Acc:HGNC:14966]	-8523.06	-8503.59	1	4.37975e-10	1.21523e-08
ENSGALG00000007474_ENSGALT00000012083	PCYT1A	phosphate_cytidylyltransferase_1,_choline,_alpha_[Source:HGNC_Symbol;Acc:HGNC:8754]	-2354.24	-2334.91	1	5.03873e-10	1.39154e-08
ENSGALG00000000894_ENSGALT00000001315	APCDD1	Protein_APCDD1_[Source:UniProtKB/Swiss-Prot;Acc:Q5R2I8]	-3477.71	-3458.45	1	5.43456e-10	1.49387e-08
ENSGALG00000039333_ENSGALT00000050951			-4185.79	-4166.68	1	6.3305e-10	1.72411e-08
ENSGALG00000000736_ENSGALT00000001052	MATK	megakaryocyte-associated_tyrosine_kinase_[Source:HGNC_Symbol;Acc:HGNC:6906]	-2456.28	-2437.36	1	7.69881e-10	2.08715e-08
ENSGALG00000021365_ENSGALT00000050026	DCTN3	dynactin_subunit_3_[Source:RefSeq_peptide;Acc:NP_001026616]	-1087.12	-1068.42	1	9.61136e-10	2.59375e-08
ENSGALG00000009638_ENSGALT00000015694	ANO6	anoctamin_6_[Source:HGNC_Symbol;Acc:HGNC:25240]	-5578.92	-5560.3	1	1.04514e-09	2.80761e-08
ENSGALG00000011620_ENSGALT00000037443	AKT1	RAC-alpha_serine/threonine-protein_kinase_[Source:RefSeq_peptide;Acc:NP_990386]	-2608	-2589.4	1	1.06483e-09	2.84757e-08
ENSGALG00000016710_ENSGALT00000026967	CYP39A1	cytochrome_P450_family_39_subfamily_A_member_1_[Source:HGNC_Symbol;Acc:HGNC:17449]	-3201.36	-3183.14	1	1.57762e-09	4.19989e-08
ENSGALG00000028567_ENSGALT00000074687	MYL9	Myosin_regulatory_light_chain_2,_smooth_muscle_major_isoform_[Source:UniProtKB/Swiss-Prot;Acc:P02612]	-908.593	-890.431	1	1.66956e-09	4.42472e-08
ENSGALG00000030511_ENSGALT00000077581			-3546.86	-3528.74	1	1.75081e-09	4.61931e-08
ENSGALG00000003092_ENSGALT00000004888	ERLIN2	ER_lipid_raft_associated_2_[Source:HGNC_Symbol;Acc:HGNC:1356]	-1958.01	-1940.21	1	2.4038e-09	6.31397e-08
ENSGALG00000008796_ENSGALT00000014300	RPF1	ribosome_production_factor_1_homolog_[Source:HGNC_Symbol;Acc:HGNC:30350]	-1797.94	-1780.2	1	2.55732e-09	6.68751e-08
ENSGALG00000006857_ENSGALT00000011101	SPATA20	spermatogenesis_associated_20_[Source:HGNC_Symbol;Acc:HGNC:26125]	-3889.57	-3871.93	1	2.84116e-09	7.39703e-08
ENSGALG00000013064_ENSGALT00000021325	NSUN2	tRNA_(cytosine(34)-C(5))-methyltransferase_[Source:RefSeq_peptide;Acc:NP_001026175]	-3985.41	-3967.93	1	3.38073e-09	8.76321e-08
ENSGALG00000034649_ENSGALT00000073125			-3001.91	-2984.62	1	4.09803e-09	1.05761e-07
ENSGALG00000011794_ENSGALT00000019245	DDX47	probable_ATP-dependent_RNA_helicase_DDX47_[Source:RefSeq_peptide;Acc:NP_001007854]	-2655	-2637.73	1	4.18182e-09	1.07455e-07
ENSGALG00000001006_ENSGALT00000001487	TP73	tumor_protein_p73_[Source:HGNC_Symbol;Acc:HGNC:12003]	-3123.24	-3106.07	1	4.61822e-09	1.18154e-07
ENSGALG00000002709_ENSGALT00000059624	MYO1C	unconventional_myosin-Ic_[Source:RefSeq_peptide;Acc:NP_001006220]	-3742.86	-3725.82	1	5.31482e-09	1.35391e-07
ENSGALG00000004074_ENSGALT00000006480	KCNS1	potassium_voltage-gated_channel,_modifier_subfamily_S,_member_1_[Source:HGNC_Symbol;Acc:HGNC:6300]	-1826.26	-1809.32	1	5.82637e-09	1.47785e-07
ENSGALG00000015313_ENSGALT00000037269	PDSS2	prenyl_(decaprenyl)_diphosphate_synthase,_subunit_2_[Source:HGNC_Symbol;Acc:HGNC:23041]	-1947.82	-1930.89	1	5.90719e-09	1.49194e-07
ENSGALG00000004555_ENSGALT00000007249	RBM22	pre-mRNA-splicing_factor_RBM22_[Source:RefSeq_peptide;Acc:NP_001006151]	-2603.29	-2586.51	1	6.92699e-09	1.74201e-07
ENSGALG00000000550_ENSGALT00000082774	STRADA	Gallus_gallus_STE20-related_kinase_adaptor_alpha_(STRADA),_mRNA._[Source:RefSeq_mRNA;Acc:NM_001012844]	-2948	-2931.23	1	6.95626e-09	1.74201e-07
ENSGALG00000013124_ENSGALT00000048163	FHOD3	formin_homology_2_domain_containing_3_[Source:HGNC_Symbol;Acc:HGNC:26178]	-7582.83	-7566.07	1	7.07383e-09	1.76398e-07
ENSGALG00000020879_ENSGALT00000033492	SLC30A7	zinc_transporter_7_[Source:RefSeq_peptide;Acc:NP_001008788]	-2051.36	-2034.8	1	8.60921e-09	2.13783e-07
ENSGALG00000039172_ENSGALT00000056474			-3359.16	-3342.87	1	1.14303e-08	2.8265e-07
ENSGALG00000010195_ENSGALT00000016572	PLK4	polo-like_kinase_4_[Source:HGNC_Symbol;Acc:HGNC:11397]	-6957.77	-6941.5	1	1.16093e-08	2.8588e-07
ENSGALG00000012052_ENSGALT00000019689	SNX4	sorting_nexin_4_[Source:HGNC_Symbol;Acc:HGNC:11175]	-2366.27	-2350.16	1	1.38748e-08	3.40248e-07
ENSGALG00000007030_ENSGALT00000011375	description:Uncharacterized	Uncharacterized_protein_[Source:UniProtKB/TrEMBL;Acc:F1NGH8]	-3532.59	-3516.52	1	1.43291e-08	3.49937e-07
ENSGALG00000038948_ENSGALT00000071675			-11161.7	-11145.7	1	1.50394e-08	3.65774e-07
ENSGALG00000005725_ENSGALT00000009190	CSF1R	colony_stimulating_factor_1_receptor_[Source:HGNC_Symbol;Acc:HGNC:2433]	-3591.22	-3575.26	1	1.60572e-08	3.88926e-07
ENSGALG00000016735_ENSGALT00000083019	TUBGCP5	tubulin_gamma_complex_associated_protein_5_[Source:HGNC_Symbol;Acc:HGNC:18600]	-3504.97	-3489.1	1	1.76236e-08	4.25125e-07
ENSGALG00000006461_ENSGALT00000038686	UBE3C	ubiquitin-protein_ligase_E3C_[Source:RefSeq_peptide;Acc:NP_001026138]	-6690.21	-6674.35	1	1.77402e-08	4.26197e-07
ENSGALG00000017201_ENSGALT00000027803	CEP57	centrosomal_protein_57kDa_[Source:HGNC_Symbol;Acc:HGNC:30794]	-3319.56	-3303.75	1	1.87354e-08	4.48283e-07
ENSGALG00000014897_ENSGALT00000024028	TYMS	thymidylate_synthetase_[Source:HGNC_Symbol;Acc:HGNC:12441]	-1761.88	-1746.57	1	3.13454e-08	7.46981e-07
ENSGALG00000011991_ENSGALT00000019560	MYOZ2	myozenin-2_[Source:RefSeq_peptide;Acc:NP_001264756]	-1415.15	-1399.93	1	3.43007e-08	8.14126e-07
ENSGALG00000038155_ENSGALT00000057587			-2097.13	-2081.96	1	3.63995e-08	8.60484e-07
ENSGALG00000008909_ENSGALT00000014487	USP13	ubiquitin_specific_peptidase_13_(isopeptidase_T-3)_[Source:HGNC_Symbol;Acc:HGNC:12611]	-5227.54	-5212.41	1	3.78657e-08	8.91579e-07
ENSGALG00000035360_ENSGALT00000068690			-6264.62	-6249.75	1	4.95631e-08	1.16237e-06
ENSGALG00000017202_ENSGALT00000027807	FAM76B	family_with_sequence_similarity_76_member_B_[Source:HGNC_Symbol;Acc:HGNC:28492]	-1987.91	-1973.07	1	5.12478e-08	1.19713e-06
ENSGALG00000003235_ENSGALT00000005121	description:Uncharacterized	Uncharacterized_protein_[Source:UniProtKB/TrEMBL;Acc:F1NLI6]	-3893.43	-3878.72	1	5.82852e-08	1.35616e-06
ENSGALG00000043307_ENSGALT00000076920			-3003.32	-2988.8	1	7.08845e-08	1.64285e-06
ENSGALG00000000776_ENSGALT00000001123	BRPF3	bromodomain_and_PHD_finger_containing_3_[Source:HGNC_Symbol;Acc:HGNC:14256]	-4246.55	-4232.08	1	7.49487e-08	1.73026e-06
ENSGALG00000008036_ENSGALT00000013037	TMEM209	transmembrane_protein_209_[Source:HGNC_Symbol;Acc:HGNC:21898]	-4628.23	-4613.89	1	8.57521e-08	1.97197e-06
ENSGALG00000010299_ENSGALT00000016754	RSPH9	radial_spoke_head_protein_9_homolog_[Source:RefSeq_peptide;Acc:NP_001264533]	-1705.28	-1690.96	1	8.71539e-08	1.99643e-06
ENSGALG00000004756_ENSGALT00000007588	CEP89	centrosomal_protein_89kDa_[Source:HGNC_Symbol;Acc:HGNC:25907]	-6055.48	-6041.19	1	8.9739e-08	2.04771e-06
ENSGALG00000002695_ENSGALT00000004249	SLC15A4	solute_carrier_family_15_(oligopeptide_transporter),_member_4_[Source:HGNC_Symbol;Acc:HGNC:23090]	-3175.42	-3161.33	1	1.10541e-07	2.51268e-06
ENSGALG00000010938_ENSGALT00000017800	KLHL7	kelch-like_protein_7_[Source:RefSeq_peptide;Acc:NP_001012875]	-3403.31	-3389.34	1	1.24929e-07	2.82886e-06
ENSGALG00000010149_ENSGALT00000016499	CMTR1	cap_methyltransferase_1_[Source:HGNC_Symbol;Acc:HGNC:21077]	-5486.43	-5472.64	1	1.4958e-07	3.37412e-06
ENSGALG00000003758_ENSGALT00000005966	MREG	melanoregulin_[Source:HGNC_Symbol;Acc:HGNC:25478]	-1223.91	-1210.17	1	1.58236e-07	3.55579e-06
ENSGALG00000010889_ENSGALT00000017699	HOOK1	protein_Hook_homolog_1_[Source:RefSeq_peptide;Acc:NP_001006542]	-4971.7	-4958.04	1	1.72633e-07	3.86462e-06
ENSGALG00000006123_ENSGALT00000009881			-9428.78	-9415.15	1	1.77982e-07	3.95563e-06
ENSGALG00000042809_ENSGALT00000055606			-2269.25	-2255.62	1	1.78037e-07	3.95563e-06
ENSGALG00000001214_ENSGALT00000001842	PARD6A	par-6_family_cell_polarity_regulator_alpha_[Source:HGNC_Symbol;Acc:HGNC:15943]	-1244.28	-1231.05	1	2.69917e-07	5.97457e-06
ENSGALG00000039830_ENSGALT00000074101			-6914.2	-6901.06	1	2.95423e-07	6.51474e-06
ENSGALG00000010020_ENSGALT00000016274	TTC7A	tetratricopeptide_repeat_protein_7A_[Source:RefSeq_peptide;Acc:NP_001026226]	-3461.68	-3448.64	1	3.27627e-07	7.19806e-06
ENSGALG00000034264_ENSGALT00000055604			-4018.4	-4005.6	1	4.18215e-07	9.15426e-06
ENSGALG00000013950_ENSGALT00000022606	TBCE	tubulin_folding_cofactor_E_[Source:HGNC_Symbol;Acc:HGNC:11582]	-4385.18	-4372.43	1	4.38957e-07	9.57282e-06
ENSGALG00000008553_ENSGALT00000013933	INO80	putative_DNA_helicase_INO80_complex_homolog_1_[Source:RefSeq_peptide;Acc:NP_001186586]	-7844.28	-7831.59	1	4.72436e-07	1.02651e-05
ENSGALG00000037402_ENSGALT00000059653			-1563.17	-1550.58	1	5.25742e-07	1.13814e-05
ENSGALG00000034967_ENSGALT00000062021			-3635.47	-3622.92	1	5.47159e-07	1.18019e-05
ENSGALG00000016801_ENSGALT00000027123	UXS1	UDP-glucuronate_decarboxylase_1_[Source:HGNC_Symbol;Acc:HGNC:17729]	-2534.43	-2521.9	1	5.58512e-07	1.20029e-05
ENSGALG00000016300_ENSGALT00000026295	TINAG	tubulointerstitial_nephritis_antigen_precursor_[Source:RefSeq_peptide;Acc:NP_001264954]	-3715.59	-3703.15	1	6.09173e-07	1.30442e-05
ENSGALG00000009732_ENSGALT00000015841	PCDH18	protocadherin_18_[Source:HGNC_Symbol;Acc:HGNC:14268]	-7503.4	-7491.09	1	7.00992e-07	1.49562e-05
ENSGALG00000006211_ENSGALT00000010073	BCL2L1	Bcl-2-like_protein_1_[Source:UniProtKB/Swiss-Prot;Acc:Q07816]	-1764.04	-1751.76	1	7.19718e-07	1.53005e-05
ENSGALG00000038858_ENSGALT00000069170			-4699.8	-4687.52	1	7.26171e-07	1.53823e-05
ENSGALG00000040320_ENSGALT00000075818			-943.821	-931.588	1	7.56328e-07	1.59639e-05
ENSGALG00000009730_ENSGALT00000062914	SLC38A4	sodium-coupled_neutral_amino_acid_transporter_4_[Source:RefSeq_peptide;Acc:NP_001186478]	-3881.08	-3868.91	1	8.08707e-07	1.70087e-05
ENSGALG00000004590_ENSGALT00000007303	CLCN6	chloride_channel,_voltage-sensitive_6_[Source:HGNC_Symbol;Acc:HGNC:2024]	-5387.78	-5375.65	1	8.45456e-07	1.77186e-05
ENSGALG00000002762_ENSGALT00000004361	UHRF1BP1	UHRF1_binding_protein_1_[Source:HGNC_Symbol;Acc:HGNC:21216]	-9889.71	-9877.77	1	1.03194e-06	2.15504e-05
ENSGALG00000011847_ENSGALT00000019330	TTC26	tetratricopeptide_repeat_domain_26_[Source:HGNC_Symbol;Acc:HGNC:21882]	-3709.07	-3697.16	1	1.05657e-06	2.1987e-05
ENSGALG00000042469_ENSGALT00000065303			-25243.5	-25231.7	1	1.19665e-06	2.48147e-05
ENSGALG00000008606_ENSGALT00000014015	NDUFS1	NADH-ubiquinone_oxidoreductase_75_kDa_subunit,_mitochondrial_[Source:RefSeq_peptide;Acc:NP_001006518]	-4918.48	-4906.79	1	1.32747e-06	2.74312e-05
ENSGALG00000009598_ENSGALT00000015639	EPRS	bifunctional_aminoacyl-tRNA_synthetase_[Source:RefSeq_peptide;Acc:NP_001006398]	-10710	-10698.5	1	1.46988e-06	3.02682e-05
ENSGALG00000012348_ENSGALT00000032911	MCM6	DNA_replication_licensing_factor_MCM6_[Source:RefSeq_peptide;Acc:NP_001006527]	-5593.54	-5581.98	1	1.5182e-06	3.11547e-05
ENSGALG00000006704_ENSGALT00000010839	VPS8	VPS8,_CORVET_complex_subunit_[Source:HGNC_Symbol;Acc:HGNC:29122]	-7790.71	-7779.29	1	1.7566e-06	3.59222e-05
ENSGALG00000013036_ENSGALT00000021281	ATP6V1E1	V-type_proton_ATPase_subunit_E_1_[Source:RefSeq_peptide;Acc:NP_001006246]	-1350.4	-1339.02	1	1.84255e-06	3.75498e-05
ENSGALG00000003908_ENSGALT00000076837	SLC6A5	solute_carrier_family_6_(neurotransmitter_transporter),_member_5_[Source:HGNC_Symbol;Acc:HGNC:11051]	-3940.19	-3928.84	1	1.90495e-06	3.86881e-05
ENSGALG00000006697_ENSGALT00000010823	TOLLIP	toll-interacting_protein_[Source:RefSeq_peptide;Acc:NP_001006471]	-1782.34	-1771.09	1	2.10078e-06	4.24845e-05
ENSGALG00000031821_ENSGALT00000069189			-1415.84	-1404.6	1	2.10625e-06	4.24845e-05
ENSGALG00000034965_ENSGALT00000051061			-10539.1	-10527.8	1	2.12034e-06	4.26231e-05
ENSGALG00000011221_ENSGALT00000018298	AGPAT9	Glycerol-3-phosphate_acyltransferase_3_[Source:UniProtKB/Swiss-Prot;Acc:Q5ZLL8]	-3114.73	-3103.49	1	2.13074e-06	4.2687e-05
ENSGALG00000003179_ENSGALT00000035033	ANGPTL7	angiopoietin_like_7_[Source:HGNC_Symbol;Acc:HGNC:24078]	-2216.57	-2205.41	1	2.31007e-06	4.60879e-05
ENSGALG00000013743_ENSGALT00000022334	ENPP7	ectonucleotide_pyrophosphatase/phosphodiesterase_7_[Source:HGNC_Symbol;Acc:HGNC:23764]	-2541.44	-2530.75	1	3.77191e-06	7.48054e-05
ENSGALG00000010818_ENSGALT00000017589	PPAP2B	lipid_phosphate_phosphohydrolase_3_[Source:RefSeq_peptide;Acc:NP_001123960]	-1714.32	-1703.67	1	3.94209e-06	7.78052e-05
ENSGALG00000014136_ENSGALT00000022870	CNGA1	Cyclic_nucleotide-gated_channel_rod_photoreceptor_subunit_alpha_[Source:UniProtKB/Swiss-Prot;Acc:Q90980]	-3732.38	-3721.74	1	3.9495e-06	7.78052e-05
ENSGALG00000001845_ENSGALT00000002857	PHTF1	putative_homeodomain_transcription_factor_1_[Source:HGNC_Symbol;Acc:HGNC:8939]	-5157.08	-5146.46	1	4.04037e-06	7.93308e-05
ENSGALG00000004725_ENSGALT00000007523	description:Uncharacterized	Uncharacterized_protein_[Source:UniProtKB/TrEMBL;Acc:E1BT93]	-3387.08	-3376.6	1	4.64927e-06	9.09841e-05
ENSGALG00000006676_ENSGALT00000046107	RLBP1	retinaldehyde-binding_protein_1_[Source:RefSeq_peptide;Acc:NP_001019865]	-1895.38	-1884.9	1	4.67898e-06	9.12632e-05
ENSGALG00000003446_ENSGALT00000069274	PRLR	prolactin_receptor_precursor_[Source:RefSeq_peptide;Acc:NP_990185]	-6644.49	-6634.12	1	5.24903e-06	0.000102045
ENSGALG00000037408_ENSGALT00000066470			-2819.25	-2808.92	1	5.47012e-06	0.000105995
ENSGALG00000042123_ENSGALT00000051963			-1562.97	-1552.69	1	5.80513e-06	0.000112119
ENSGALG00000002336_ENSGALT00000051482			-20938.3	-20928	1	5.90608e-06	0.000113697
ENSGALG00000015336_ENSGALT00000024751	description:neuronal	neuronal_acetylcholine_receptor_subunit_alpha-7-like_[Source:RefSeq_peptide;Acc:NP_990532]	-1836.6	-1826.4	1	6.26397e-06	0.000120195
ENSGALG00000005872_ENSGALT00000009439	BANP	protein_BANP_isoform_2_[Source:RefSeq_peptide;Acc:NP_001167017]	-1865.71	-1855.62	1	6.9994e-06	0.000133872
ENSGALG00000006877_ENSGALT00000011141	KLHL4	kelch_like_family_member_4_[Source:HGNC_Symbol;Acc:HGNC:6355]	-3980.25	-3970.2	1	7.40212e-06	0.000141118
ENSGALG00000002519_ENSGALT00000003969	SLC25A33	solute_carrier_family_25_(pyrimidine_nucleotide_carrier),_member_33_[Source:HGNC_Symbol;Acc:HGNC:29681]	-2377.49	-2367.47	1	7.61092e-06	0.000144632
ENSGALG00000003370_ENSGALT00000005328	KIAA1191	putative_monooxygenase_p33MONOX_[Source:RefSeq_peptide;Acc:NP_001025781]	-1735.22	-1725.37	1	9.02984e-06	0.000171046
ENSGALG00000013657_ENSGALT00000077521	ZNF236	zinc_finger_protein_236_[Source:HGNC_Symbol;Acc:HGNC:13028]	-11660.9	-11651.1	1	1.03203e-05	0.000194866
ENSGALG00000039222_ENSGALT00000071644			-4448.46	-4438.78	1	1.07562e-05	0.000202449
ENSGALG00000011900_ENSGALT00000019422	NAGA	alpha-N-acetylgalactosaminidase_precursor_[Source:RefSeq_peptide;Acc:NP_001161200]	-3355.15	-3345.47	1	1.08683e-05	0.000203909
ENSGALG00000007803_ENSGALT00000012658	description:Uncharacterized	Uncharacterized_protein_[Source:UniProtKB/TrEMBL;Acc:F1NNI5]	-3847.17	-3837.5	1	1.09609e-05	0.000204996
ENSGALG00000003651_ENSGALT00000005786	NT5C3B	7-methylguanosine_phosphate-specific_5'-nucleotidase_[Source:UniProtKB/Swiss-Prot;Acc:Q5ZKF6]	-2222.95	-2213.3	1	1.10658e-05	0.000206306
ENSGALG00000008506_ENSGALT00000013856	MRPS25	28S_ribosomal_protein_S25,_mitochondrial_[Source:RefSeq_peptide;Acc:NP_001264769]	-663.852	-654.203	1	1.11847e-05	0.000207866
ENSGALG00000040048_ENSGALT00000048368			-2679.41	-2669.84	1	1.22034e-05	0.000226087
ENSGALG00000006627_ENSGALT00000010703	UPB1	ureidopropionase,_beta_[Source:HGNC_Symbol;Acc:HGNC:16297]	-2691.35	-2681.86	1	1.31695e-05	0.000243224
ENSGALG00000013311_ENSGALT00000021741	ANO3	anoctamin-3_isoform_1_[Source:RefSeq_peptide;Acc:NP_001186394]	-6300.95	-6291.48	1	1.3488e-05	0.000248331
ENSGALG00000009971_ENSGALT00000016208	CDC20	cell_division_cycle_protein_20_homolog_[Source:RefSeq_peptide;Acc:NP_001006536]	-3282.7	-3273.33	1	1.48633e-05	0.000272802
ENSGALG00000035699_ENSGALT00000061752			-5208.08	-5198.95	1	1.91622e-05	0.000350615
ENSGALG00000004848_ENSGALT00000076455	YBX1	Nuclease-sensitive_element-binding_protein_1_[Source:UniProtKB/Swiss-Prot;Acc:Q06066]	-1777.86	-1768.74	1	1.95196e-05	0.000356052
ENSGALG00000003857_ENSGALT00000006130	ITK	IL2-inducible_T-cell_kinase_[Source:HGNC_Symbol;Acc:HGNC:6171]	-4098.75	-4089.64	1	1.97485e-05	0.000358393
ENSGALG00000003267_ENSGALT00000005170	STAT3	Signal_transducer_and_activator_of_transcription_3_[Source:UniProtKB/Swiss-Prot;Acc:Q6DV79]	-4631.76	-4622.66	1	1.97692e-05	0.000358393
ENSGALG00000036172_ENSGALT00000069444			-2732.67	-2723.62	1	2.09756e-05	0.0003791
ENSGALG00000005598_ENSGALT00000008981	ZNF598	zinc_finger_protein_598_[Source:HGNC_Symbol;Acc:HGNC:28079]	-5632.06	-5623.21	1	2.57866e-05	0.000463566
ENSGALG00000001551_ENSGALT00000052575	CCNL2	cyclin-L1_[Source:RefSeq_peptide;Acc:NP_989801]	-3182.1	-3173.25	1	2.58817e-05	0.000463566
ENSGALG00000008493_ENSGALT00000033408	METTL21A	methyltransferase-like_protein_21A_isoform_a_[Source:RefSeq_peptide;Acc:NP_001264773]	-1387.9	-1379.05	1	2.58844e-05	0.000463566
ENSGALG00000032517_ENSGALT00000056826			-2272.02	-2263.21	1	2.68379e-05	0.000479189
ENSGALG00000015710_ENSGALT00000025335	TMEM129	transmembrane_protein_129_precursor_[Source:RefSeq_peptide;Acc:NP_001026339]	-2080.9	-2072.12	1	2.80057e-05	0.000498535
ENSGALG00000026241_ENSGALT00000044002	GRIN3B	glutamate_receptor,_ionotropic,_N-methyl-D-aspartate_3B_[Source:HGNC_Symbol;Acc:HGNC:16768]	-3777.91	-3769.16	1	2.87883e-05	0.000510927
ENSGALG00000012156_ENSGALT00000053358	DPP10	dipeptidyl-peptidase_10_(inactive)_[Source:HGNC_Symbol;Acc:HGNC:20823]	-4337.38	-4328.63	1	2.88853e-05	0.000511115
ENSGALG00000016796_ENSGALT00000027117	C1H2ORF49	ashwin_[Source:RefSeq_peptide;Acc:NP_001025984]	-1498.39	-1489.79	1	3.36826e-05	0.000594222
ENSGALG00000011861_ENSGALT00000019349	SYT16	synaptotagmin_16_[Source:HGNC_Symbol;Acc:HGNC:23142]	-3524.94	-3516.38	1	3.5187e-05	0.000618915
ENSGALG00000012098_ENSGALT00000060501	NAA30	N(alpha)-acetyltransferase_30,_NatC_catalytic_subunit_[Source:HGNC_Symbol;Acc:HGNC:19844]	-1292.46	-1283.99	1	3.83895e-05	0.000673239
ENSGALG00000004530_ENSGALT00000007215	MMD2	monocyte_to_macrophage_differentiation-associated_2_[Source:HGNC_Symbol;Acc:HGNC:30133]	-1594.19	-1585.77	1	4.06542e-05	0.000710847
ENSGALG00000036798_ENSGALT00000053661			-9923.4	-9915.01	1	4.17616e-05	0.000728055
ENSGALG00000011498_ENSGALT00000018736	TCAIM	T-cell_activation_inhibitor,_mitochondrial_[Source:HGNC_Symbol;Acc:HGNC:25241]	-3427.02	-3418.7	1	4.51641e-05	0.000785058
ENSGALG00000009383_ENSGALT00000015289	SAMD7	sterile_alpha_motif_domain_containing_7_[Source:HGNC_Symbol;Acc:HGNC:25394]	-3703.19	-3694.94	1	4.87631e-05	0.000845132
ENSGALG00000001335_ENSGALT00000002041	FAM18B1	family_with_sequence_similarity_18,_member_B1_[Source:RefSeq_peptide;Acc:NP_001025870]	-1198.49	-1190.3	1	5.17091e-05	0.000893569
ENSGALG00000008771_ENSGALT00000014267	SHOC2	leucine-rich_repeat_protein_SHOC-2_[Source:RefSeq_peptide;Acc:NP_001026407]	-3135.43	-3127.28	1	5.43672e-05	0.000936765
ENSGALG00000012618_ENSGALT00000020599	FANCC	Fanconi_anemia,_complementation_group_C_[Source:RefSeq_peptide;Acc:NP_001006587]	-3987.39	-3979.29	1	5.7187e-05	0.000979638
ENSGALG00000005470_ENSGALT00000008788	PLPPR5	phospholipid_phosphatase_related_5_[Source:HGNC_Symbol;Acc:HGNC:31703]	-1320.46	-1312.36	1	5.7187e-05	0.000979638
ENSGALG00000013962_ENSGALT00000022632	HBS1L	Uncharacterized_protein_[Source:UniProtKB/TrEMBL;Acc:Q5F369]	-3772.36	-3764.27	1	5.76112e-05	0.000984053
ENSGALG00000000094_ENSGALT00000000132	ADIPOR1	adiponectin_receptor_protein_1_[Source:RefSeq_peptide;Acc:NP_001026198]	-2092.52	-2084.46	1	5.96667e-05	0.00101623
ENSGALG00000013720_ENSGALT00000078677	FBXO15	F-box_protein_15_[Source:HGNC_Symbol;Acc:HGNC:13617]	-3245.61	-3237.58	1	6.08568e-05	0.00103352
ENSGALG00000017189_ENSGALT00000027775	C1H11ORF70	uncharacterized_protein_LOC418985_[Source:RefSeq_peptide;Acc:NP_001264741]	-2015.27	-2007.28	1	6.38396e-05	0.00108107
ENSGALG00000002424_ENSGALT00000003814	RECQL5	RecQ_helicase-like_5_[Source:HGNC_Symbol;Acc:HGNC:9950]	-7102.72	-7094.75	1	6.47498e-05	0.00109335
ENSGALG00000015551_ENSGALT00000025070	GRIN3A	glutamate_receptor,_ionotropic,_N-methyl-D-aspartate_3A_[Source:HGNC_Symbol;Acc:HGNC:16767]	-3523.92	-3515.96	1	6.56592e-05	0.00110554
ENSGALG00000014976_ENSGALT00000031549	GATA6	GATA_binding_protein_6_[Source:HGNC_Symbol;Acc:HGNC:4174]	-1292.65	-1284.72	1	6.84001e-05	0.00114842
ENSGALG00000004521_ENSGALT00000007197	GPX3	glutathione_peroxidase_3_precursor_[Source:RefSeq_peptide;Acc:NP_001156704]	-904.368	-896.475	1	7.09029e-05	0.00118707
ENSGALG00000028627_ENSGALT00000046125	description:Uncharacterized	Uncharacterized_protein_[Source:UniProtKB/TrEMBL;Acc:R4GFR4]	-1235.39	-1227.63	1	8.13696e-05	0.00135846
ENSGALG00000038943_ENSGALT00000080978			-1745.43	-1737.71	1	8.47349e-05	0.00141066
ENSGALG00000006540_ENSGALT00000010564	description:dopamine	dopamine_D1C_receptor_[Source:RefSeq_peptide;Acc:NP_001136143]	-3143.39	-3135.69	1	8.73019e-05	0.00144931
ENSGALG00000036527_ENSGALT00000061188			-4710.57	-4702.99	1	9.84187e-05	0.00162928
ENSGALG00000002335_ENSGALT00000059778	DOCK3	dedicator_of_cytokinesis_3_[Source:HGNC_Symbol;Acc:HGNC:2989]	-9416.81	-9409.53	1	0.000135723	0.00224057
ENSGALG00000012178_ENSGALT00000019885	PDGFB	platelet-derived_growth_factor_subunit_B_precursor_[Source:RefSeq_peptide;Acc:NP_989601]	-1794.61	-1787.37	1	0.000140906	0.00231964
ENSGALG00000010998_ENSGALT00000017909	EFCAB7	EF-hand_calcium_binding_domain_7_[Source:HGNC_Symbol;Acc:HGNC:29379]	-2816.09	-2808.89	1	0.000147692	0.00242462
ENSGALG00000003134_ENSGALT00000004953	description:Uncharacterized	Uncharacterized_protein_[Source:UniProtKB/TrEMBL;Acc:H9KZ58]	-957.138	-950.098	1	0.000175104	0.00286666
ENSGALG00000032732_ENSGALT00000062019			-7100.69	-7093.66	1	0.000177107	0.00288625
ENSGALG00000036001_ENSGALT00000071129			-1511.93	-1504.9	1	0.000177277	0.00288625
ENSGALG00000040493_ENSGALT00000049974			-975.649	-968.683	1	0.000189564	0.00307781
ENSGALG00000036097_ENSGALT00000072350			-4597.76	-4590.82	1	0.000195297	0.00316221
ENSGALG00000014791_ENSGALT00000023879	WDR3	WD_repeat-containing_protein_3_[Source:RefSeq_peptide;Acc:NP_001026656]	-3989.09	-3982.17	1	0.000199138	0.00321559
ENSGALG00000003359_ENSGALT00000078413	RAB5C	Ras-related_protein_Rab-5C_[Source:UniProtKB/Swiss-Prot;Acc:Q98932]	-952.223	-945.346	1	0.000208332	0.00335489
ENSGALG00000008415_ENSGALT00000013707	ALS2	ALS2,_alsin_Rho_guanine_nucleotide_exchange_factor_[Source:HGNC_Symbol;Acc:HGNC:443]	-11175.8	-11168.9	1	0.000209199	0.00335969
ENSGALG00000001220_ENSGALT00000001852	HERPUD1	homocysteine-inducible,_endoplasmic_reticulum_stress-inducible,_ubiquitin-like_domain_member_1_[Source:HGNC_Symbol;Acc:HGNC:13744]	-3256.46	-3249.63	1	0.000219142	0.00350983
ENSGALG00000021572_ENSGALT00000034909	SSH2	slingshot_protein_phosphatase_2_[Source:HGNC_Symbol;Acc:HGNC:30580]	-9995.03	-9988.22	1	0.000223289	0.00356658
ENSGALG00000027389_ENSGALT00000043076	RGS7BP	regulator_of_G-protein_signaling_7_binding_protein_[Source:HGNC_Symbol;Acc:HGNC:23271]	-815.733	-809.034	1	0.000251785	0.00401092
ENSGALG00000007095_ENSGALT00000011487	CUL2	cullin-2_[Source:RefSeq_peptide;Acc:NP_001026141]	-3944.39	-3937.7	1	0.000252781	0.00401595
ENSGALG00000017276_ENSGALT00000059620	ARHGEF5	Rho_guanine_nucleotide_exchange_factor_5_[Source:HGNC_Symbol;Acc:HGNC:13209]	-3538.99	-3532.31	1	0.000255137	0.00404251
ENSGALG00000014167_ENSGALT00000022912	TTLL12	tubulin--tyrosine_ligase-like_protein_12_[Source:RefSeq_peptide;Acc:NP_001012558]	-4226.13	-4219.55	1	0.000286203	0.00452261
ENSGALG00000015624_ENSGALT00000025190	VCAN	versican_core_protein_precursor_[Source:RefSeq_peptide;Acc:NP_990118]	-19783.6	-19777	1	0.000290326	0.00457553
ENSGALG00000015316_ENSGALT00000024723	C3H6ORF203	uncharacterized_protein_LOC421779_[Source:RefSeq_peptide;Acc:NP_001264939]	-1715.33	-1708.83	1	0.000309931	0.00487153
ENSGALG00000009676_ENSGALT00000015749	METTL5	methyltransferase_like_5_[Source:HGNC_Symbol;Acc:HGNC:25006]	-1247.56	-1241.08	1	0.00031615	0.0049561
ENSGALG00000006290_ENSGALT00000010161	HS3ST4	heparan_sulfate-glucosamine_3-sulfotransferase_4_[Source:HGNC_Symbol;Acc:HGNC:5200]	-938.403	-931.975	1	0.000336111	0.00524121
ENSGALG00000017091_ENSGALT00000027608	FLT1	vascular_endothelial_growth_factor_receptor_1_precursor_[Source:RefSeq_peptide;Acc:NP_989583]	-9768.06	-9761.66	1	0.00034514	0.00536784
ENSGALG00000021158_ENSGALT00000007533	SLC7A9	B(0,+)-type_amino_acid_transporter_1_[Source:RefSeq_peptide;Acc:NP_001186062]	-3558.77	-3552.41	1	0.000358033	0.00555373
ENSGALG00000003932_ENSGALT00000006265	SDC4	Syndecan-4_[Source:UniProtKB/Swiss-Prot;Acc:P49416]	-1298.62	-1292.27	1	0.000363589	0.00562516
ENSGALG00000006363_ENSGALT00000010286	CABIN1	calcineurin_binding_protein_1_[Source:HGNC_Symbol;Acc:HGNC:24187]	-14697.6	-14691.3	1	0.000388855	0.00600035
ENSGALG00000037553_ENSGALT00000047348			-825.573	-819.374	1	0.000429932	0.00661692
ENSGALG00000038217_ENSGALT00000067157			-2213.35	-2207.19	1	0.000449333	0.00689755
ENSGALG00000031009_ENSGALT00000058310			-3353.42	-3347.32	1	0.000479538	0.00734214
ENSGALG00000017239_ENSGALT00000027869			-2813.47	-2807.54	1	0.000573895	0.00876413
ENSGALG00000000870_ENSGALT00000063555	DCAKD	dephospho-CoA_kinase_domain_containing_[Source:HGNC_Symbol;Acc:HGNC:26238]	-1193.28	-1187.4	1	0.000604328	0.00920509
ENSGALG00000016412_ENSGALT00000026473	MBOAT2	Membrane-bound_O-acyltransferase_domain-containing_protein_2_[Source:UniProtKB/Swiss-Prot;Acc:Q5ZKL6]	-2229.51	-2223.65	1	0.000613356	0.00931859
ENSGALG00000008661_ENSGALT00000014106	CYR61	Protein_CYR61_[Source:UniProtKB/Swiss-Prot;Acc:P19336]	-2039.81	-2033.97	1	0.000628031	0.00951709
ENSGALG00000015140_ENSGALT00000024430	description:Uncharacterized	Uncharacterized_protein_[Source:UniProtKB/TrEMBL;Acc:F1NJD7]	-6251.95	-6246.11	1	0.000635024	0.00959844
ENSGALG00000009466_ENSGALT00000048975	SEC23IP	SEC23_interacting_protein_[Source:HGNC_Symbol;Acc:HGNC:17018]	-6875.88	-6870.06	1	0.000641611	0.00967327
ENSGALG00000025796_ENSGALT00000043545	Fe	1,2-dihydroxy-3-keto-5-methylthiopentene_dioxygenase_[Source:UniProtKB/Swiss-Prot;Acc:Q5ZL43]	-1364.91	-1359.11	1	0.000659518	0.00991795
ENSGALG00000001062_ENSGALT00000001589	GGT7	gamma-glutamyltransferase_7_[Source:HGNC_Symbol;Acc:HGNC:4259]	-4384.35	-4378.59	1	0.000692079	0.0103812
ENSGALG00000010182_ENSGALT00000050819	SLC29A1	solute_carrier_family_29_(equilibrative_nucleoside_transporter),_member_1_[Source:HGNC_Symbol;Acc:HGNC:11003]	-2881.16	-2875.43	1	0.000706982	0.0105779
ENSGALG00000026192_ENSGALT00000042657	ST8SIA4	CMP-N-acetylneuraminate-poly-alpha-2,8-sialyltransferase_[Source:RefSeq_peptide;Acc:NP_989614]	-1929.09	-1923.39	1	0.000737055	0.011
ENSGALG00000008827_ENSGALT00000014344	FERMT1	fermitin_family_member_1_[Source:HGNC_Symbol;Acc:HGNC:15889]	-4960.75	-4955.09	1	0.000762485	0.0113508
ENSGALG00000014486_ENSGALT00000037304	TAPT1	Transmembrane_anterior_posterior_transformation_protein_1_homolog_[Source:UniProtKB/Swiss-Prot;Acc:Q5ZLG8]	-1957.06	-1951.4	1	0.000768421	0.0114105
ENSGALG00000010017_ENSGALT00000051293	MCFD2	multiple_coagulation_factor_deficiency_2_precursor_[Source:RefSeq_peptide;Acc:NP_001006400]	-1086.75	-1081.31	1	0.000969462	0.0143597
ENSGALG00000016727_ENSGALT00000026992	JADE3	jade_family_PHD_finger_3_[Source:HGNC_Symbol;Acc:HGNC:22982]	-5199.1	-5193.8	1	0.00113689	0.0167975
ENSGALG00000030173_ENSGALT00000063992			-1794.74	-1789.48	1	0.00117567	0.0173272
ENSGALG00000042419_ENSGALT00000067504			-1299.31	-1294.07	1	0.00120478	0.0177121
ENSGALG00000026790_ENSGALT00000043613	DMRT2	doublesex_and_mab-3_related_transcription_factor_2_[Source:HGNC_Symbol;Acc:HGNC:2935]	-2662.95	-2657.77	1	0.00128622	0.0188624
ENSGALG00000000787_ENSGALT00000038723	DHX38	pre-mRNA-splicing_factor_ATP-dependent_RNA_helicase_PRP16_[Source:RefSeq_peptide;Acc:NP_001025753]	-7658.62	-7653.46	1	0.00131383	0.0192196
ENSGALG00000028629_ENSGALT00000079606	description:transmembrane	transmembrane_4_L_six_family_member_1_[Source:RefSeq_peptide;Acc:NP_001264759]	-1399.12	-1393.99	1	0.00135607	0.0197886
ENSGALG00000028290_ENSGALT00000043255	C1H21ORF91	protein_EURL_[Source:RefSeq_peptide;Acc:NP_990068]	-1750.3	-1745.2	1	0.00140853	0.0205034
ENSGALG00000011206_ENSGALT00000018268	KITLG	Kit_ligand_Processed_kit_ligand_[Source:UniProtKB/Swiss-Prot;Acc:Q09108]	-1481.3	-1476.23	1	0.0014537	0.021109
ENSGALG00000008076_ENSGALT00000013109	TMEM164	transmembrane_protein_164_[Source:RefSeq_peptide;Acc:NP_001012904]	-2065.03	-2060.01	1	0.0015215	0.0220393
ENSGALG00000010392_ENSGALT00000016925	CCSER1	coiled-coil_serine_rich_protein_1_[Source:HGNC_Symbol;Acc:HGNC:29349]	-4403.46	-4398.47	1	0.00158353	0.0228818
ENSGALG00000006947_ENSGALT00000011255	BDH1	D-beta-hydroxybutyrate_dehydrogenase,_mitochondrial_precursor_[Source:RefSeq_peptide;Acc:NP_001006547]	-2287.1	-2282.18	1	0.00169537	0.0244381
ENSGALG00000008271_ENSGALT00000013463	CALHM1	calcium_homeostasis_modulator_1_[Source:HGNC_Symbol;Acc:HGNC:23494]	-2553.74	-2549.02	1	0.00211564	0.0303481
ENSGALG00000036492_ENSGALT00000053293			-6276.58	-6271.88	1	0.00217744	0.031159
ENSGALG00000043167_ENSGALT00000081930			-2918.97	-2914.36	1	0.00241487	0.0344731
ENSGALG00000003709_ENSGALT00000005886	PLAT	plasminogen_activator,_tissue_[Source:HGNC_Symbol;Acc:HGNC:9051]	-4099.32	-4094.74	1	0.00246742	0.0351384
ENSGALG00000020505_ENSGALT00000032718	KCNJ11	potassium_channel,_inwardly_rectifying_subfamily_J,_member_11_[Source:HGNC_Symbol;Acc:HGNC:6257]	-1624.28	-1619.71	1	0.00251534	0.0357348
ENSGALG00000000523_ENSGALT00000000721	STK38	serine/threonine_kinase_38_[Source:HGNC_Symbol;Acc:HGNC:17847]	-2981.94	-2977.44	1	0.00268271	0.0380212
ENSGALG00000016324_ENSGALT00000026335	GSTA3	glutathione_S-transferase_alpha_3_[Source:RefSeq_peptide;Acc:NP_990149]	-1421.82	-1417.36	1	0.00281478	0.0397975
ENSGALG00000006410_ENSGALT00000010348	HTATSF1	HIV-1_Tat_specific_factor_1_[Source:HGNC_Symbol;Acc:HGNC:5276]	-2772.74	-2768.43	1	0.00332054	0.0468363
ENSGALG00000017097_ENSGALT00000027620	MTIF3	Gallus_gallus_mitochondrial_translational_initiation_factor_3_(MTIF3),_nuclear_gene_encoding_mitochondrial_protein,_transcript_variant_1,_mRNA._[Source:RefSeq_mRNA;Acc:NM_001277799]	-1689.22	-1684.97	1	0.00354951	0.0498281
ENSGALG00000015409_ENSGALT00000024855	PROS1	protein_S_(alpha)_[Source:HGNC_Symbol;Acc:HGNC:9456]	-4278.34	-4274.09	1	0.00357065	0.050006
ENSGALG00000002588_ENSGALT00000004076	PPARD	peroxisome_proliferator-activated_receptor_delta_[Source:RefSeq_peptide;Acc:NP_990059]	-2468.04	-2463.8	1	0.00359507	0.0502289
ENSGALG00000017009_ENSGALT00000027475	KPNA3	importin_subunit_alpha-3_[Source:RefSeq_peptide;Acc:NP_001180504]	-2584.93	-2580.7	1	0.00361091	0.0503313
ENSGALG00000005886_ENSGALT00000009462	WSCD1	WSC_domain_containing_1_[Source:HGNC_Symbol;Acc:HGNC:29060]	-5276.74	-5272.53	1	0.00372343	0.0517775
ENSGALG00000031567_ENSGALT00000071429			-1378.23	-1374.1	1	0.00406175	0.0563497
ENSGALG00000041821_ENSGALT00000067961			-5299.43	-5295.35	1	0.00432086	0.059804
ENSGALG00000039595_ENSGALT00000082819			-4158.27	-4154.22	1	0.00446381	0.0616381
ENSGALG00000038933_ENSGALT00000055113			-735.019	-731.112	1	0.0051866	0.0714517
ENSGALG00000008302_ENSGALT00000013516	CIB1	calcium_and_integrin-binding_protein_1_isoform_a_[Source:RefSeq_peptide;Acc:NP_001264577]	-977.503	-973.61	1	0.00526935	0.0724229
ENSGALG00000007191_ENSGALT00000082171	TK1	Thymidine_kinase,_cytosolic_[Source:UniProtKB/Swiss-Prot;Acc:P04047]	-1377.87	-1374	1	0.00541426	0.0742419
ENSGALG00000027184_ENSGALT00000044367	OLFML1	olfactomedin_like_1_[Source:HGNC_Symbol;Acc:HGNC:24473]	-3497.66	-3493.82	1	0.00557805	0.0763108
ENSGALG00000032400_ENSGALT00000071719			-1367.47	-1363.65	1	0.0057418	0.0781891
ENSGALG00000010850_ENSGALT00000017633	C8A	complement_component_8,_alpha_polypeptide_[Source:HGNC_Symbol;Acc:HGNC:1352]	-4679.82	-4676.02	1	0.00578463	0.0785911
ENSGALG00000012129_ENSGALT00000019817	CCDC93	coiled-coil_domain-containing_protein_93_[Source:RefSeq_peptide;Acc:NP_001026433]	-3706.5	-3702.74	1	0.00606462	0.0821001
ENSGALG00000010654_ENSGALT00000017333	C4H4ORF41	trafficking_protein_particle_complex_subunit_11_[Source:RefSeq_peptide;Acc:NP_001026707]	-6975.58	-6971.82	1	0.00607069	0.0821001
ENSGALG00000004741_ENSGALT00000007553	EPHB2	ephrin_type-B_receptor_2_precursor_[Source:RefSeq_peptide;Acc:NP_996834]	-5526.22	-5522.46	1	0.00614119	0.082864
ENSGALG00000006098_ENSGALT00000009843	HPRT1	Gallus_gallus_hypoxanthine_phosphoribosyltransferase_1_(HPRT1),_mRNA._[Source:RefSeq_mRNA;Acc:NM_204848]	-1226.47	-1222.74	1	0.0062652	0.0843447
ENSGALG00000007298_ENSGALT00000011815	BACE1	beta-site_APP-cleaving_enzyme_1_[Source:HGNC_Symbol;Acc:HGNC:933]	-2394.58	-2390.85	1	0.00631551	0.0848288
ENSGALG00000013085_ENSGALT00000037455	PTPRO	receptor-type_tyrosine-protein_phosphatase_O_[Source:RefSeq_peptide;Acc:NP_989453]	-8124.75	-8121.04	1	0.00645602	0.0865195
ENSGALG00000013740_ENSGALT00000022329	SLC20A1	solute_carrier_family_20_(phosphate_transporter),_member_1_[Source:HGNC_Symbol;Acc:HGNC:10946]	-4841.44	-4837.78	1	0.00688472	0.0920559
ENSGALG00000010435_ENSGALT00000016992	RASGRP3	ras_guanyl-releasing_protein_3_[Source:RefSeq_peptide;Acc:NP_001006401]	-3700.37	-3696.76	1	0.00718151	0.0958075

## Sheet: eggnog_possel_sites
Reference Gene ID	Reference Transcript ID	Gene Symbol	P-Value	eggNOG Category	eggNOG Function	Positive Selected Sites
ENSGALG00000000094	ENSGALT00000000132	ADIPOR1	0.001	General function prediction only	Channel protein (Hemolysin III family	--
ENSGALG00000000407	ENSGALT00000000555		0.001	Function unknown	Kelch-like protein	G_537_0.989*, I_535_0.985*, P_534_0.983*, C_531_0.988*, P_530_0.987*,
ENSGALG00000000523	ENSGALT00000000721	STK38	0.01	Signal transduction mechanisms	serine threonine-protein kinase	S_252_0.965*,
ENSGALG00000000736	ENSGALT00000001052	MATK	0.001	Signal transduction mechanisms	tyrosine kinase	M_79_0.999**, S_77_0.998**, L_76_0.993**, K_75_0.991**,
ENSGALG00000000776	ENSGALT00000001123		0.001	Chromatin structure and dynamics ,Transcription ,	bromodomain	--
ENSGALG00000000894	ENSGALT00000001315	APCDD1	0.001	General function prediction only	Adenomatosis polyposis coli down-regulated	A_15_0.990*, R_10_0.997**, L_12_0.993**, L_16_0.988*,
ENSGALG00000001006	ENSGALT00000001487	TP73	0.001	Transcription	induces growth arrest or apoptosis depending on the physiological circumstances and cell type. Involved in cell cycle regulation as a trans-activator that acts to negatively regulate cell division by controlling a set of genes required for this process. One of the activated genes is an inhibitor of cyclin-dependent kinases. Apoptosis induction seems to be mediated either by stimulation of BAX and…	E_155_0.997**, T_157_0.992**,
ENSGALG00000001062	ENSGALT00000001589	GGT7	0.001	Amino acid transport and metabolism	Gamma-glutamyltranspeptidase (EC 2.3.2.2)	A_660_0.983*,
ENSGALG00000001167	ENSGALT00000001767	KCNJ1	0.001	Intracellular trafficking, secretion, and vesicular transport	potassium inwardly-rectifying channel, subfamily J, member 1	R_8_0.997**, M_1_0.996**, R_19_0.995**, R_16_0.956*, S_17_0.998**, E_15_0.998**,
ENSGALG00000001214	ENSGALT00000001842	PARD6A	0.001	Signal transduction mechanisms	par-6 (partitioning defective 6) homolog	L_87_0.999**, R_89_0.998**,
ENSGALG00000001220	ENSGALT00000001852	HERPUD1	0.001	Posttranslational modification, protein turnover, chaperones	Homocysteine-inducible, endoplasmic reticulum stress-inducible, ubiquitin-like domain member 1	--
ENSGALG00000001335	ENSGALT00000002041	FAM18B1	0.001	Intracellular trafficking, secretion, and vesicular transport	Family with sequence similarity 18, member	K_30_0.995**, I_31_0.995**,
ENSGALG00000001473	ENSGALT00000002235	MIB2	0.001	General function prediction only	Ankyrin Repeat	Q_276_0.999**, S_204_0.989*, G_372_1.000**, S_251_0.999**, K_222_1.000**, D_268_0.958*, V_333_0.999**, V_213_0.994**, E_274_0.999**, G_195_1.000**, H_215_0.999**, E_312_0.999**, V_336_0.991**, T_354_0.999**, A_244_0.999**, T_202_1.000**, K_264_1.000**, R_314_0.951*, G_241_1.000**, T_252_0.999**, D_301_0.999**, P_238_1.000**, W_329_0.996**, R_298_0.999**, K_262_0.986*, R_302_1.000**, R_345_1.000**…
ENSGALG00000001662	ENSGALT00000002539	ATP10B	0.001	Inorganic ion transport and metabolism	P-type atpase	K_1114_0.974*, Y_1113_0.960*, K_1106_0.976*, H_1098_0.971*, N_1115_0.977*, Y_1101_0.995**, W_1099_0.985*,
ENSGALG00000001845	ENSGALT00000002857	PHTF1	0.001	Transcription	homeodomain transcription factor 1	M_109_0.980*,
ENSGALG00000001944	ENSGALT00000003009	TBC1D2	0.001	Intracellular trafficking, secretion, and vesicular transport	TBC1 domain family member	S_238_0.972*, K_194_0.992**, Y_233_0.996**, D_185_0.985*, P_258_0.976*, P_196_0.994**, D_186_0.965*, N_230_0.995**, P_208_0.980*, M_493_0.992**, T_214_0.971*, Q_260_0.976*, E_187_0.962*, G_201_0.982*, H_223_0.958*, A_490_0.951*, T_231_0.993**, A_485_0.987*, V_248_0.988*, N_247_0.976*, G_243_0.992**, L_207_0.992**, Q_217_0.987*, I_235_0.959*, V_484_0.988*, P_210_0.963*, W_242_0.966*, K_489_0.950*,…
ENSGALG00000001968	ENSGALT00000003058	SYT6	0.001	General function prediction only	synaptotagmin	H_405_0.999**, R_398_0.994**, R_387_0.992**, G_374_0.993**, G_368_0.991**, C_376_1.000**, E_392_0.991**, Y_396_1.000**, M_393_0.993**, I_401_0.999**, W_404_0.998**, V_378_0.999**, H_369_1.000**, G_379_1.000**, E_383_0.999**, I_372_0.999**, E_371_0.999**, G_384_0.999**, N_370_0.999**, K_399_1.000**, A_402_0.999**,
ENSGALG00000001973	ENSGALT00000003067	GNL2	0.001	General function prediction only	Required for a late step of 50S ribosomal subunit assembly. Has GTPase activity (By similarity)	K_160_0.993**, I_191_0.968*, P_172_0.979*, N_149_0.992**, H_194_0.998**, D_189_0.989*, E_163_0.984*, K_170_0.993**, E_166_0.999**, R_151_0.997**, M_165_0.960*, E_164_0.987*, M_184_0.977*, F_187_0.988*, T_150_0.997**, Y_173_0.986*, Q_159_0.999**, R_190_0.988*, S_156_0.958*,
ENSGALG00000002053	ENSGALT00000003192	POR	0.001	Inorganic ion transport and metabolism	Component of the sulfite reductase complex that catalyzes the 6-electron reduction of sulfite to sulfide. This is one of several activities required for the biosynthesis of L- cysteine from sulfate. The flavoprotein component catalyzes the electron flow from NADPH - FAD - FMN to the hemoprotein component (By similarity)	R_381_0.961*, K_357_1.000**, E_399_1.000**, T_382_1.000**, A_392_1.000**, K_356_1.000**, E_387_0.999**, E_410_0.986*, L_385_0.999**, T_393_0.968*, E_352_0.987*, S_406_1.000**, A_405_0.999**, Y_366_0.999**, G_411_1.000**, M_404_1.000**, Q_398_1.000**, R_367_1.000**, Q_390_1.000**, P_361_0.999**, N_383_1.000**, H_358_1.000**, V_384_0.999**, A_409_0.971*, L_388_0.999**, N_355_1.000**,
ENSGALG00000002350	ENSGALT00000003708	DNAH3	0.001	Cytoskeleton	Dynein, axonemal, heavy chain	R_121_0.955*,
ENSGALG00000002424	ENSGALT00000003814	RECQL5	0.001	Replication, recombination and repair	atp-dependent dna helicase	--
ENSGALG00000002470	ENSGALT00000003899	CYP27A1	0.001	Secondary metabolites biosynthesis, transport and catabolism	Cytochrome p450	V_407_0.976*, Y_405_0.962*, H_391_0.997**, V_411_0.993**, P_402_0.997**, F_403_0.980*, S_400_0.994**,
ENSGALG00000002519	ENSGALT00000003969	SLC25A33	0.001	Intracellular trafficking, secretion, and vesicular transport	solute carrier family 25 (pyrimidine nucleotide carrier), member 33	H_12_0.950, A_2_0.989*,
ENSGALG00000002588	ENSGALT00000004076	PPARD	0.01	Transcription	peroxisome proliferator-activated receptor	--
ENSGALG00000002682	ENSGALT00000004226	BRD3	0.001	Chromatin structure and dynamics ,Transcription ,	bromodomain	S_716_0.993**, D_720_0.994**, E_722_0.999**, S_714_0.998**, S_712_0.962*, S_719_0.967*,
ENSGALG00000002695	ENSGALT00000004249	SLC15A4	0.001	Amino acid transport and metabolism	transporter	Q_539_0.996**, G_537_0.997**, L_540_0.978*,
ENSGALG00000002762	ENSGALT00000004361	UHRF1BP1	0.001	General function prediction only	uhrf1 binding protein	--
ENSGALG00000002880	ENSGALT00000004541		0.001	General function prediction only	synthetase	T_70_0.966*, H_35_0.986*, Q_66_0.999**, L_24_0.996**, P_1_0.988*, R_75_0.966*, A_33_0.989*, F_77_0.994**, G_30_0.999**, T_82_0.998**, M_60_0.988*, S_64_0.995**, V_23_0.999**, Q_62_0.984*, D_52_0.994**, T_27_0.995**, D_13_0.985*, D_14_0.994**, R_25_0.998**, V_26_0.996**, E_32_1.000**, W_53_0.995**, E_42_0.999**, G_44_0.974*, S_50_0.994**, L_41_0.986*, Q_11_0.983*, R_55_0.950*, V_37_0.999**, H_59_0…
ENSGALG00000002886	ENSGALT00000004551	NKX2-5	0.001	Transcription	NK2 homeobox 5	H_289_0.999**, V_254_0.954*, V_251_0.977*, N_262_0.999**, I_285_0.998**, Q_280_1.000**, P_279_0.998**, T_287_0.999**, A_293_0.999**, N_272_0.999**, Q_252_0.996**, V_268_0.999**, I_278_0.998**, Y_244_0.998**, I_291_0.999**, N_265_0.999**, S_267_0.979*, S_286_0.999**, N_241_1.000**, L_271_0.994**, P_249_1.000**, S_273_0.998**, A_259_0.990**, M_264_0.963*,
ENSGALG00000003092	ENSGALT00000004888	ERLIN2	0.001	Posttranslational modification, protein turnover, chaperones	ER lipid raft associated	M_52_0.974*, S_45_0.997**, K_60_0.999**, I_56_0.984*, S_58_0.996**,
ENSGALG00000003134	ENSGALT00000004953		0.001	General function prediction only	GTP-binding Protein	T_77_0.985*, Y_121_0.982*,
ENSGALG00000003235	ENSGALT00000005121		0.001	General function prediction only	zinc finger RNA binding protein	Y_6_0.967*, V_13_0.955*, Y_14_0.966*,
ENSGALG00000003242	ENSGALT00000005128	STAR	0.001	Posttranslational modification, protein turnover, chaperones	START	A_27_0.999**, Q_33_0.998**, S_61_0.997**, S_233_0.971*, R_62_0.996**, W_48_0.999**, L_63_0.995**, L_23_0.994**, S_42_0.996**, S_46_0.991**, E_65_1.000**, L_35_0.981*, L_38_0.996**,
ENSGALG00000003267	ENSGALT00000005170	STAT3	0.001	Transcription	Signal transducer and activator of transcription 3 (Acute-phase response factor)	P_705_0.958*,
ENSGALG00000003298	ENSGALT00000005224	DDX55	0.001	Cytoskeleton	atp-dependent rna helicase	N_46_0.990*, A_51_0.988*, F_43_0.980*, K_47_0.981*, E_52_0.999**, L_42_0.988*, D_48_0.992**, P_41_0.995**, M_44_0.990*, A_53_0.985*,
ENSGALG00000003304	ENSGALT00000005236	CRTC1	0.001	Transcription	CREB regulated transcription coactivator 1	Q_596_1.000**, P_606_0.998**, L_579_0.999**, L_609_0.999**, S_571_1.000**, E_578_1.000**, G_585_0.996**, P_598_0.998**, L_583_0.999**, S_590_0.999**, E_601_1.000**, H_613_1.000**, D_605_1.000**, M_614_1.000**, K_603_0.999**, D_600_0.992**, G_611_0.997**, V_589_1.000**, T_608_1.000**,
ENSGALG00000003370	ENSGALT00000005328	KIAA1191	0.001	General function prediction only	kiaa1191	E_49_0.992**,
ENSGALG00000003428	ENSGALT00000005424		0.001	Signal transduction mechanisms	Phosphoinositide-3-kinase, regulatory subunit	T_609_0.982*, G_604_0.997**, M_531_0.955*, E_608_1.000**, K_606_1.000**,
ENSGALG00000003563	ENSGALT00000005643	YARS	0.001	Translation, ribosomal structure and biogenesis	Is required not only for elongation of protein synthesis but also for the initiation of all mRNA translation through initiator tRNA(fMet) aminoacylation (By similarity)	A_349_0.972*, P_353_0.991**, S_321_0.960*, M_37_0.982*, V_324_0.994**, K_336_0.969*, K_328_0.996**, N_327_0.987*, V_313_0.997**, G_316_0.991**, D_317_0.964*,
ENSGALG00000003651	ENSGALT00000005786	NT5C3B	0.001	Nucleotide transport and metabolism	5'-nucleotidase, cytosolic	L_5_0.974*, P_3_0.990**, T_218_0.972*,
ENSGALG00000003709	ENSGALT00000005886	PLAT	0.01	Posttranslational modification, protein turnover, chaperones	protease	--
ENSGALG00000003758	ENSGALT00000005966	MREG	0.001	Function unknown		E_27_0.999**, A_22_0.977*, A_21_0.999**, P_24_0.990**,
ENSGALG00000003816	ENSGALT00000006051	NT5C1A	0.001	Nucleotide transport and metabolism	5'-nucleotidase, cytosolic	K_395_0.971*, K_407_0.993**, N_405_0.999**, E_400_0.996**, P_397_0.998**, Q_402_0.995**, Q_399_0.995**, K_401_0.965*,
ENSGALG00000003851	ENSGALT00000006120	TRIT1	0.001	Translation, ribosomal structure and biogenesis	Catalyzes the transfer of a dimethylallyl group onto the adenine at position 37 in tRNAs that read codons beginning with uridine, leading to the formation of N6-(dimethylallyl)adenosine (i(6)A) (By similarity)	D_250_0.956*, L_248_0.956*, D_238_0.991**, D_229_0.971*, L_232_0.980*, R_235_0.984*, E_247_0.996**,
ENSGALG00000003857	ENSGALT00000006130	ITK	0.001	Signal transduction mechanisms	IL2-inducible T-cell kinase	L_169_0.955*, L_168_0.960*, K_166_0.992**,
ENSGALG00000003932	ENSGALT00000006265	SDC4	0.001	Signal transduction mechanisms	Cell surface proteoglycan (By similarity)	--
ENSGALG00000004074	ENSGALT00000006480	KCNS1	0.001	Inorganic ion transport and metabolism	potassium voltage-gated channel, delayed-rectifier, subfamily S, member 1	R_28_0.961*, S_32_0.996**, S_30_0.996**,
ENSGALG00000004192	ENSGALT00000006663	SLTM	0.001	Transcription	SAFB-like transcription modulator	D_170_0.998**, D_132_0.999**, N_131_1.000**, D_174_0.999**, V_171_1.000**, L_120_0.997**, D_129_0.998**, D_143_1.000**, N_177_0.988*, D_127_0.999**, K_156_0.968*, E_139_0.999**, E_163_0.998**, R_158_0.998**, S_148_1.000**, S_118_1.000**, G_130_0.999**, P_152_1.000**, N_147_0.999**, A_141_0.973*, N_145_1.000**, E_117_1.000**, Q_128_0.979*, T_168_1.000**, K_149_0.999**, E_150_0.995**, L_146_0.999**…
ENSGALG00000004320	ENSGALT00000006879	FAT2	0.001	Posttranslational modification, protein turnover, chaperones	FAT tumor suppressor homolog 2 (Drosophila)	E_3223_0.998**, S_3179_0.984*, L_3176_0.993**, G_3265_0.994**, M_3227_0.986*, T_3166_0.983*, E_3165_0.995**, N_3240_0.991**, Y_3215_0.982*, T_2957_0.990*, K_3266_0.993**, L_3241_0.995**, V_3207_0.985*, T_3206_0.986*, E_3173_0.982*, Q_3268_0.997**, G_3144_0.992**, D_3155_0.985*, N_3262_0.984*, D_3247_0.968*, E_3164_0.980*, H_3264_0.998**, K_3229_0.999**, V_3259_0.981*, E_3237_0.995**, A_3157_0.983…
ENSGALG00000004398	ENSGALT00000007013	CARD11	0.001	Function unknown	caspase recruitment domain family, member 11	N_607_0.989*, D_606_1.000**, E_604_0.978*, D_618_0.999**, A_614_0.995**, E_616_0.995**,
ENSGALG00000004446	ENSGALT00000007077	NPFFR1	0.001	General function prediction only	Neuropeptide FF receptor 1	G_125_0.998**, S_120_0.999**, C_117_0.996**, M_126_1.000**, W_110_0.993**, L_122_0.994**, P_111_0.953*, M_116_0.977*, Q_124_0.994**, F_112_0.991**, V_123_0.999**, M_119_0.999**,
ENSGALG00000004472	ENSGALT00000007121	ASTN1	0.001	Signal transduction mechanisms	astrotactin	M_487_0.998**, G_486_0.994**, N_451_0.998**, K_509_0.989*, S_507_0.999**, N_505_0.994**, E_485_1.000**, Q_452_0.999**,
ENSGALG00000004491	ENSGALT00000007151	DMGDH	0.001	Amino acid transport and metabolism	Catalyzes the last two steps in the biosynthesis of 5- methylaminomethyl-2-thiouridine (mnm(5)s(2)U) at the wobble position (U34) in tRNA. Catalyzes the FAD-dependent demodification of cmnm(5)s(2)U34 to nm(5)s(2)U34, followed by the transfer of a methyl group from S-adenosyl-L-methionine to nm(5)s(2)U34, to form mnm(5)s(2)U34 (By similarity)	R_523_0.992**, A_518_0.992**, S_515_0.968*,
ENSGALG00000004521	ENSGALT00000007197	GPX3	0.001	Posttranslational modification, protein turnover, chaperones	glutathione peroxidase	N_80_0.978*, Q_83_0.952*,
ENSGALG00000004530	ENSGALT00000007215	MMD2	0.001	General function prediction only	Channel protein (Hemolysin III family	A_15_0.995**,
ENSGALG00000004553	ENSGALT00000007247	SGPL1	0.001	Amino acid transport and metabolism	decarboxylase	T_198_0.995**, A_204_0.996**, L_211_0.998**, A_207_0.996**, E_214_0.999**, M_193_0.953*, E_221_0.983*, M_203_0.997**, Y_213_0.994**, D_210_0.994**, I_201_0.997**, L_202_0.992**, I_217_0.984*, G_197_0.998**, G_196_0.996**,
ENSGALG00000004555	ENSGALT00000007249	RBM22	0.001	RNA processing and modification	RNA binding motif protein 22	G_6_0.994**, S_7_0.979*, A_18_0.958*, T_9_0.982*, S_2_0.978*,
ENSGALG00000004590	ENSGALT00000007303	CLCN6	0.001	Inorganic ion transport and metabolism	Chloride Channel	D_45_0.983*, K_44_0.989*,
ENSGALG00000004613	ENSGALT00000007345	P2RX5	0.001	Intracellular trafficking, secretion, and vesicular transport	purinergic receptor P2X, ligand-gated ion channel	L_402_0.981*, S_395_0.996**, T_389_0.982*, Q_394_0.997**, L_390_0.996**, S_381_0.979*, P_396_0.980*, L_399_0.995**, S_379_0.997**, S_387_0.978*, R_382_0.997**, S_384_0.979*,
ENSGALG00000004675	ENSGALT00000007450	RGS9BP	0.001	Intracellular trafficking, secretion, and vesicular transport	regulator of G protein signaling 9 binding protein	D_11_1.000**, E_4_0.999**, M_1_0.981*, L_13_0.996**, L_10_0.999**, L_9_0.999**, E_5_0.999**,
ENSGALG00000004725	ENSGALT00000007523		0.001	Energy production and conversion	Dehydrogenase	A_220_0.993**, T_216_0.995**, K_228_0.997**,
ENSGALG00000004728	ENSGALT00000007530	RGL1	0.001	General function prediction only	Ral guanine nucleotide dissociation	E_227_0.963*, L_214_0.996**, D_244_0.990**, E_217_0.977*, D_216_0.990**, S_208_0.994**, A_237_0.998**, S_210_0.990**, I_222_0.999**, S_229_0.990**, G_224_0.954*, A_245_0.973*, Q_232_0.982*, M_243_0.999**, E_238_0.963*, S_223_0.991**, L_240_0.955*, T_209_0.991**, F_228_0.999**, E_221_0.992**, Q_239_0.999**, E_226_0.963*, D_234_0.979*,
ENSGALG00000021158	ENSGALT00000007533	SLC7A9	0.001	Amino acid transport and metabolism	amino acid	F_314_0.968*,
ENSGALG00000004740	ENSGALT00000007552	TMOD2	0.001	Cytoskeleton	tropomodulin	S_81_0.999**, E_77_0.997**, D_89_0.999**, E_76_1.000**, A_82_0.996**,
ENSGALG00000004741	ENSGALT00000007553	EPHB2	0.01	Signal transduction mechanisms	Serine Threonine protein kinase	M_598_0.951*,
ENSGALG00000004756	ENSGALT00000007588	CEP89	0.001	Function unknown	centrosomal protein 89kDa	K_167_0.992**,
ENSGALG00000004955	ENSGALT00000007945		0.001	Signal transduction mechanisms ,Intracellular trafficking, secretion, and vesicular transport ,	SyNapsiN	Q_359_0.974*, P_358_0.998**, Q_355_0.993**, K_357_0.999**, Q_351_0.999**, P_348_0.996**, Q_347_0.996**, E_329_0.983*, P_342_0.996**, S_360_0.995**, Q_343_0.974*, P_346_0.995**,
ENSGALG00000005470	ENSGALT00000008788	PLPPR5	0.001	Lipid transport and metabolism	Lipid phosphate phosphatase-related protein type	G_56_0.987*,
ENSGALG00000005509	ENSGALT00000008842	DPYD	0.001	Nucleotide transport and metabolism	Catalyzes the conversion of dihydroorotate to orotate	E_230_0.983*, T_267_0.959*, P_237_0.995**, R_235_0.964*, K_249_0.998**, D_264_0.997**, A_278_0.997**, F_280_0.986*, N_242_0.997**, L_268_0.981*, G_275_0.983*, Y_238_0.973*, F_257_0.982*, D_239_0.988*,
ENSGALG00000005598	ENSGALT00000008981	ZNF598	0.001	General function prediction only	Zinc finger protein	--
ENSGALG00000005637	ENSGALT00000009044	GBF1	0.001	General function prediction only	and SEC7 domain	--
ENSGALG00000005802	ENSGALT00000009188	FLT4	0.001	Signal transduction mechanisms	fms-related tyrosine kinase 1 (vascular endothelial growth factor vascular permeability factor receptor)	P_56_0.987*, Q_54_0.999**, G_53_0.994**, S_60_0.999**, E_74_0.994**, G_70_0.999**, M_75_0.986*, G_63_0.999**, H_55_0.999**, K_71_0.990**, K_65_0.999**, V_66_0.996**, S_84_0.999**,
ENSGALG00000005725	ENSGALT00000009190	CSF1R	0.001	Signal transduction mechanisms	colony stimulating factor 1 receptor	L_899_0.961*, S_898_0.992**, W_897_0.989*,
ENSGALG00000005869	ENSGALT00000009434	COPG1	0.001	Intracellular trafficking, secretion, and vesicular transport	The coatomer is a cytosolic protein complex that binds to dilysine motifs and reversibly associates with Golgi non- clathrin-coated vesicles, which further mediate biosynthetic protein transport from the ER, via the Golgi up to the trans Golgi network. Coatomer complex is required for budding from Golgi membranes, and is essential for the retrograde Golgi-to-ER transport of dilysine-tagged protei…	Y_646_0.997**, T_654_0.992**, A_638_0.998**, G_627_0.990**, M_659_0.982*, T_640_0.986*, S_633_0.992**, G_618_0.986*, A_619_0.981*, S_632_0.996**, R_649_0.996**, L_642_0.991**, H_658_0.984*, E_622_0.994**, F_623_0.960*, P_634_0.996**, V_637_0.955*, R_624_0.994**, E_635_0.988*, K_652_0.977*, E_641_0.995**, S_657_0.976*, P_636_0.988*,
ENSGALG00000005872	ENSGALT00000009439	BANP	0.001	Transcription	Btg3 associated nuclear protein	S_162_0.998**, E_158_0.997**,
ENSGALG00000005886	ENSGALT00000009462	WSCD1	0.01	General function prediction only	WSC domain containing	S_318_0.957*,
ENSGALG00000006098	ENSGALT00000009843	HPRT1	0.01	Nucleotide transport and metabolism	hypoxanthine phosphoribosyltransferase	I_10_0.954*,
ENSGALG00000006123	ENSGALT00000009881		0.001	Replication, recombination and repair	helicase	--
ENSGALG00000006141	ENSGALT00000009916	POFUT2	0.001	Posttranslational modification, protein turnover, chaperones	O-fucosyltransferase 2	D_149_0.970*, G_161_0.992**, L_155_0.985*, G_160_0.995**, N_153_0.999**, H_158_0.983*, D_163_0.970*, Y_164_0.986*, A_151_0.998**,
ENSGALG00000006211	ENSGALT00000010073	BCL2L1	0.001	Signal transduction mechanisms	bcl2-like 1	W_177_0.962*, P_176_0.990*, N_181_0.961*, Q_179_0.989*,
ENSGALG00000006290	ENSGALT00000010161	HS3ST4	0.001	Posttranslational modification, protein turnover, chaperones	heparan sulfate glucosamine 3-O-sulfotransferase 4	S_302_0.998**,
ENSGALG00000006363	ENSGALT00000010286	CABIN1	0.001	General function prediction only	Calcineurin binding protein 1	--
ENSGALG00000006368	ENSGALT00000010293	PTPN5	0.001	Signal transduction mechanisms	protein tyrosine phosphatase	G_114_0.994**, R_112_0.977*, I_121_0.985*, V_117_0.988*, S_119_0.978*, D_109_0.968*, I_113_0.976*, V_116_0.996**, T_111_0.984*, N_115_0.970*, Y_120_0.979*,
ENSGALG00000006410	ENSGALT00000010348		0.01	General function prediction only	factor 1	A_39_0.951*,
ENSGALG00000006418	ENSGALT00000010359	PDPK1	0.001	Signal transduction mechanisms	3phosphoinositidedependent protein kinase	E_255_0.973*, V_252_0.980*, A_249_0.992**, A_242_0.990**, S_253_0.998**, Q_250_0.979*, R_241_0.992**, L_256_0.997**,
ENSGALG00000006486	ENSGALT00000010484	RPP30	0.001	Translation, ribosomal structure and biogenesis	Part of ribonuclease P, a protein complex that generates mature tRNA molecules by cleaving their 5'-ends (By similarity)	A_159_0.993**, E_153_0.999**, G_149_0.992**, R_148_0.998**, Y_156_0.990*, P_158_0.995**, T_157_0.964*,
ENSGALG00000006540	ENSGALT00000010564		0.001	Signal transduction mechanisms	dopamine receptor	A_53_0.953*, F_48_0.994**,
ENSGALG00000006627	ENSGALT00000010703	UPB1	0.001	General function prediction only	nitrilase cyanide hydratase and apolipoprotein n-acyltransferase	G_31_0.971*, G_30_0.987*,
ENSGALG00000006681	ENSGALT00000010803	BRSK2	0.001	Signal transduction mechanisms	Serine Threonine protein kinase	R_351_0.995**, S_366_0.989*, S_363_0.989*, S_367_0.993**, P_368_0.979*, S_354_0.997**, T_362_0.986*, L_360_0.992**,
ENSGALG00000006697	ENSGALT00000010823	TOLLIP	0.001	General function prediction only	Toll interacting protein	M_1_0.957*, T_3_0.989*,
ENSGALG00000006704	ENSGALT00000010839	VPS8	0.001	Intracellular trafficking, secretion, and vesicular transport	vacuolar protein sorting 8 homolog (S. cerevisiae)	--
ENSGALG00000006857	ENSGALT00000011101	SPATA20	0.001	Posttranslational modification, protein turnover, chaperones	spermatogenesis-associated protein	N_427_0.997**, D_418_0.975*, K_426_0.999**,
ENSGALG00000006873	ENSGALT00000011134	PHRF1	0.001	Function unknown	Ras association (RalGDS AF-6) domain family (N-terminal) member	A_33_0.996**, V_26_0.997**, V_17_0.997**, R_438_1.000**, S_18_0.994**, L_30_0.997**, I_28_0.980*, R_12_0.997**, W_437_0.999**, V_14_1.000**, C_15_1.000**, Q_20_0.989*, D_8_0.998**, I_34_0.999**, E_19_1.000**, I_436_0.998**,
ENSGALG00000006877	ENSGALT00000011141	KLHL4	0.001	Function unknown	Kelch-like 5 (Drosophila)	V_77_0.986*, A_75_0.981*, I_73_0.964*,
ENSGALG00000006947	ENSGALT00000011255	BDH1	0.01	General function prediction only	dehydrogenase	F_27_0.985*,
ENSGALG00000007008	ENSGALT00000011343	POLR3E	0.001	Transcription	Polymerase (RNA) III (DNA directed) polypeptide E	K_178_0.995**, L_177_0.999**, L_172_0.956*, Y_33_0.993**, G_176_0.990*, N_32_0.996**, Y_175_0.992**, H_173_0.992**, R_140_0.982*, H_171_0.991**,
ENSGALG00000007030	ENSGALT00000011375		0.001	Function unknown	transmembrane protein 180-like	S_302_0.995**, L_306_0.975*, C_297_0.970*, H_303_0.995**,
ENSGALG00000007095	ENSGALT00000011487	CUL2	0.001	Posttranslational modification, protein turnover, chaperones	cullin 1	--
ENSGALG00000007140	ENSGALT00000011564	NRP1	0.001	Intracellular trafficking, secretion, and vesicular transport	Neuropilin 1	Q_798_0.999**, E_795_0.999**, P_794_0.993**, D_784_0.988*, S_796_0.991**, K_781_0.958*, E_786_0.998**, D_793_0.963*, N_797_0.999**, S_782_0.994**, E_792_0.999**,
ENSGALG00000007141	ENSGALT00000011565	LRRK1	0.001	General function prediction only	GTP-binding Protein	D_1395_0.995**, R_1392_0.957*, E_1404_0.992**, Q_1408_0.996**, V_1415_0.996**, V_1398_0.977*, G_1419_0.991**, A_1414_0.996**, E_1402_0.994**, I_1399_0.984*, G_1400_0.992**, K_1403_0.969*, P_1423_0.998**, G_1393_0.986*,
ENSGALG00000007298	ENSGALT00000011815	BACE1	0.01	Posttranslational modification, protein turnover, chaperones	Beta-site APP-cleaving enzyme	--
ENSGALG00000007332	ENSGALT00000011865	PRICKLE2	0.001	Posttranslational modification, protein turnover, chaperones	Prickle homolog	H_675_1.000**, E_725_0.999**, Q_717_1.000**, L_705_0.998**, L_691_0.992**, D_712_1.000**, Y_711_1.000**, R_670_0.981*, Y_733_0.998**, D_686_0.997**, L_699_0.998**, R_682_0.999**, S_693_0.998**, E_694_1.000**, R_708_0.996**, N_687_0.999**, P_737_0.999**, C_696_0.997**, L_665_0.999**, D_710_0.999**, R_678_0.996**, S_741_0.999**, A_732_0.981*, V_740_0.959*, T_739_0.999**, R_702_0.991**, R_676_0.998*…
ENSGALG00000007409	ENSGALT00000011985	SCN4B	0.001	Intracellular trafficking, secretion, and vesicular transport	sodium channel, voltage-gated, type IV, beta subunit	S_81_0.992**, I_74_0.994**, I_79_0.998**, H_76_1.000**,
ENSGALG00000007474	ENSGALT00000012083	PCYT1A	0.001	Lipid transport and metabolism ,Cell wall/membrane/envelope biogenesis ,	cytidylyltransferase	E_363_0.992**, P_4_0.994**, T_5_0.999**,
ENSGALG00000007702	ENSGALT00000012479	XYLT2	0.001	Function unknown	Xylosyltransferase	T_328_0.997**, Q_133_0.976*, P_207_0.970*, W_285_0.981*, W_313_0.960*, P_284_0.994**, A_130_0.994**, W_211_0.992**, D_212_0.980*, W_315_0.981*, Q_210_0.972*, D_316_0.997**, G_135_0.989*, I_280_0.994**, Q_134_0.998**, Q_128_0.973*, L_296_0.998**, D_136_0.997**, Y_326_0.993**,
ENSGALG00000007803	ENSGALT00000012658		0.001	Carbohydrate transport and metabolism	Solute carrier family 2 (Facilitated glucose transporter) member	G_350_0.987*,
ENSGALG00000007904	ENSGALT00000012830	DLAT	0.001	Energy production and conversion	pyruvate dehydrogenase complex	A_399_0.992**, A_390_0.991**, P_299_0.996**, A_393_0.989*, A_387_0.980*, A_327_0.968*,
ENSGALG00000008036	ENSGALT00000013037	TMEM209	0.001	Function unknown	Transmembrane protein 209	S_52_0.970*, I_57_0.974*, Y_54_0.978*, T_47_0.956*,
ENSGALG00000008059	ENSGALT00000013083	ASCC2	0.001	General function prediction only	activating signal cointegrator 1 complex subunit 2	E_624_0.985*, G_615_0.985*, E_621_0.995**, E_620_0.994**,
ENSGALG00000008076	ENSGALT00000013109	TMEM164	0.01	Function unknown	Transmembrane protein 164	--
ENSGALG00000008271	ENSGALT00000013463	CALHM1	0.01	Function unknown	calcium homeostasis modulator 1	G_90_0.988*,
ENSGALG00000008274	ENSGALT00000013466	CRBN	0.001	Posttranslational modification, protein turnover, chaperones	Component of some DCX (DDB1-CUL4-X-box) E3 protein ligase complex, a complex that mediates the ubiquitination and subsequent proteasomal degradation of target proteins and is required for limb outgrowth and expression of the fibroblast growth factor FGF8. In the complex, may act as a substrate receptor	E_4_0.994**, L_17_0.977*, G_14_0.981*, M_13_0.992**, P_21_0.996**, H_16_0.999**,
ENSGALG00000008335	ENSGALT00000013567	PHTF2	0.001	Transcription	Homeodomain transcription factor	T_6_0.985*, W_11_0.987*, S_3_0.992**, V_10_0.998**, I_9_0.982*, Y_12_0.997**,
ENSGALG00000008415	ENSGALT00000013707	ALS2	0.001	Function unknown	whole genome shotgun sequence	--
ENSGALG00000008506	ENSGALT00000013856	MRPS25	0.001	Translation, ribosomal structure and biogenesis	Mitochondrial ribosomal protein S25	L_80_0.967*, Y_79_0.976*,
ENSGALG00000008551	ENSGALT00000013929	CRELD2	0.001	Posttranslational modification, protein turnover, chaperones	cysteine-rich with egf-like domains	D_242_1.000**, S_279_0.957*, N_257_0.996**, Y_289_0.997**, G_260_0.986*, D_259_0.996**, E_294_0.995**, C_282_1.000**, L_241_0.990**, K_265_0.994**, G_273_0.997**, D_268_0.967*, G_276_0.999**, K_295_0.979*, D_293_0.999**, G_288_0.999**, L_256_0.997**, K_283_0.999**, S_247_1.000**, C_267_0.999**, K_281_0.954*, V_272_0.996**, A_286_0.998**, C_244_0.998**, A_269_0.999**, S_270_0.997**, T_297_0.995**,…
ENSGALG00000008553	ENSGALT00000013933	INO80	0.001	Replication, recombination and repair	DNA helicase component of the INO80 complex which remodels chromatin by shifting nucleosomes and is involved in DNA repair (By similarity)	K_1313_0.962*,
ENSGALG00000008606	ENSGALT00000014015	NDUFS1	0.001	Energy production and conversion	subunit G	S_18_0.964*,
ENSGALG00000008661	ENSGALT00000014106	CYR61	0.001	Extracellular structures	Cysteine-rich angiogenic inducer 61	K_58_0.980*, E_62_0.961*,
ENSGALG00000008771	ENSGALT00000014267	SHOC2	0.001	Signal transduction mechanisms	soc-2 suppressor of clear homolog (C. elegans)	--
ENSGALG00000008827	ENSGALT00000014344	FERMT1	0.001	Cytoskeleton	fermitin family member	--
ENSGALG00000008838	ENSGALT00000014359	FKBP15	0.001	Function unknown	Peptidyl-prolyl cis-trans isomerase	S_915_0.996**, V_912_0.996**, K_907_0.993**, Y_926_0.998**, E_919_0.998**, Q_914_0.978*, V_905_0.983*, N_910_0.973*, R_917_0.991**, K_906_0.997**, R_929_0.982*,
ENSGALG00000008909	ENSGALT00000014487	USP13	0.001	Posttranslational modification, protein turnover, chaperones	ubiquitin carboxyl-terminal hydrolase	L_85_0.992**, S_234_0.996**, V_91_0.989*, R_89_0.961*,
ENSGALG00000009383	ENSGALT00000015289	SAMD7	0.001	General function prediction only	sterile alpha motif domain containing 7	S_354_0.975*,
ENSGALG00000009438	ENSGALT00000015368	SLC39A9	0.001	Inorganic ion transport and metabolism	Solute carrier family 39 (Zinc transporter), member 9	A_27_0.995**, C_8_0.998**, Y_19_0.996**, M_14_0.980*, D_3_0.997**, G_22_0.999**, I_24_0.996**, D_2_0.995**, S_6_0.997**, P_25_0.999**, A_21_0.995**, S_31_0.999**, I_7_0.985*,
ENSGALG00000009598	ENSGALT00000015639	EPRS	0.001	Translation, ribosomal structure and biogenesis	Catalyzes the attachment of glutamate to tRNA(Glu) in a two-step reaction glutamate is first activated by ATP to form Glu-AMP and then transferred to the acceptor end of tRNA(Glu) (By similarity)	--
ENSGALG00000009626	ENSGALT00000015678	THBS1	0.001	Posttranslational modification, protein turnover, chaperones	thrombospondin	K_739_0.990*, V_609_0.984*, A_745_0.980*, D_751_0.969*, D_740_0.988*, D_744_0.954*, C_746_0.978*, Y_737_0.975*, D_752_0.966*, G_741_0.995**, D_753_0.996**, G_743_0.991**,
ENSGALG00000009638	ENSGALT00000015694	ANO6	0.001	Function unknown	Anoctamin	I_956_0.986*, T_948_0.970*, E_969_0.983*, D_954_0.980*, I_957_0.955*,
ENSGALG00000009676	ENSGALT00000015749	METTL5	0.001	Translation, ribosomal structure and biogenesis	methyltransferase like 5	--
ENSGALG00000009682	ENSGALT00000015759	VEPH1	0.001	General function prediction only	ventricular zone expressed PH domain homolog 1 (zebrafish)	L_206_0.984*, L_231_0.993**, P_186_0.990*, A_205_0.992**, Q_215_0.958*, L_222_0.992**, G_232_0.961*, Y_189_0.970*, H_217_0.987*, R_227_0.992**, V_174_0.993**,
ENSGALG00000009725	ENSGALT00000015828	SCG5	0.001	Posttranslational modification, protein turnover, chaperones ,Intracellular trafficking, secretion, and vesicular transport ,	secretogranin V (7B2 protein)	S_160_0.999**, Y_153_0.995**, V_197_0.994**, E_166_0.992**, G_157_0.953*, S_201_0.994**, N_169_0.984*, L_164_0.989*, R_175_0.983*, L_163_0.987*, P_172_0.993**, K_158_0.988*, H_151_0.999**,
ENSGALG00000009732	ENSGALT00000015841	PCDH18	0.001	Intracellular trafficking, secretion, and vesicular transport	protocadherin	H_129_0.976*, F_128_0.991**, H_124_0.977*,
ENSGALG00000009846	ENSGALT00000016007	BBS5	0.001	Function unknown	bardet-biedl syndrome 5	T_333_0.985*, Q_335_0.999**, E_339_0.975*, L_337_0.998**,
ENSGALG00000009916	ENSGALT00000016127	SCFD1	0.001	Intracellular trafficking, secretion, and vesicular transport	Sec1 family domain containing 1	I_37_0.999**, V_35_0.989*, R_40_0.988*, M_16_0.991**, L_36_0.989*, D_39_0.985*, Y_38_0.987*, Q_43_0.986*,
ENSGALG00000009971	ENSGALT00000016208	CDC20	0.001	Cell cycle control, cell division, chromosome partitioning	Cell division cycle 20	A_32_0.956*, T_18_0.968*,
ENSGALG00000010020	ENSGALT00000016274	TTC7A	0.001	Signal transduction mechanisms	tetratricopeptide repeat domain	S_350_0.989*, S_631_0.960*, M_351_0.951*,
ENSGALG00000010117	ENSGALT00000016457	SLC25A21	0.001	Posttranslational modification, protein turnover, chaperones	solute carrier family 25 (mitochondrial oxoadipate carrier), member 21	A_58_0.994**, K_56_0.995**, Q_35_0.961*, T_32_0.969*, R_57_0.992**, R_31_0.996**,
ENSGALG00000010149	ENSGALT00000016499	CMTR1	0.001	RNA processing and modification	FtsJ methyltransferase domain containing 2	N_148_0.989*, S_147_0.988*, T_150_0.984*,
ENSGALG00000010195	ENSGALT00000016572	PLK4	0.001	Cell cycle control, cell division, chromosome partitioning	Polo-like kinase 4	V_854_0.970*, E_858_0.957*, S_929_0.969*, K_859_0.974*,
ENSGALG00000010221	ENSGALT00000016617		0.001	General function prediction only	Zinc finger, SWIM-type containing	R_705_0.996**, V_710_0.997**, R_711_0.999**, E_708_0.994**, E_719_0.999**, M_695_0.997**, C_716_0.996**, T_698_0.997**,
ENSGALG00000010299	ENSGALT00000016754	RSPH9	0.001	Function unknown	radial spoke head 9 homolog (Chlamydomonas)	E_130_0.969*,
ENSGALG00000010392	ENSGALT00000016925		0.01	Function unknown		--
ENSGALG00000010435	ENSGALT00000016992	RASGRP3	0.01	General function prediction only	RAS guanyl releasing protein 3 (calcium and DAG-regulated)	--
ENSGALG00000010576	ENSGALT00000017211	GTF2A1	0.001	Transcription	factor IIA	E_306_0.999**, E_298_0.988*, E_297_0.993**, D_293_0.998**, E_301_0.996**, G_308_0.998**, G_305_0.975*, D_299_0.955*, E_296_0.982*, D_287_0.999**, Q_309_0.988*, D_307_0.985*, S_282_0.993**, K_302_0.999**,
ENSGALG00000010654	ENSGALT00000017333	TRAPPC11	0.01	Function unknown	trafficking protein particle complex 11	--
ENSGALG00000010708	ENSGALT00000017422	ICA1	0.001	Signal transduction mechanisms	Islet cell autoantigen	N_337_0.982*, Q_336_0.969*, K_322_0.989*, H_334_0.980*, K_335_0.967*, D_320_0.996**, S_326_0.979*, G_321_0.975*,
ENSGALG00000010748	ENSGALT00000017486	EXO1	0.001	Replication, recombination and repair	Structure-specific nuclease with 5'-flap endonuclease and 5'-3' exonuclease activities involved in DNA replication and repair. During DNA replication, cleaves the 5'-overhanging flap structure that is generated by displacement synthesis when DNA polymerase encounters the 5'-end of a downstream Okazaki fragment. It enters the flap from the 5'-end and then tracks to cleave the flap base, leaving a …	K_661_0.951*, N_683_0.997**, Q_666_0.972*, L_662_0.971*, Q_678_0.993**, S_675_0.955*,
ENSGALG00000010795	ENSGALT00000017557	ISPD	0.001	Lipid transport and metabolism	Catalyzes the formation of 4-diphosphocytidyl-2-C- methyl-D-erythritol from CTP and 2-C-methyl-D-erythritol 4- phosphate (MEP) (By similarity)	L_295_0.995**, L_288_0.961*, Q_296_0.969*, A_283_0.967*, S_300_0.965*, S_287_0.983*, N_297_0.981*,
ENSGALG00000010811	ENSGALT00000017577	LGMN	0.001	Posttranslational modification, protein turnover, chaperones	phosphatidylinositol glycan anchor biosynthesis, class K	W_392_0.985*, H_393_0.999**, I_344_0.988*, L_361_0.969*, T_356_0.973*, G_357_0.997**, Q_379_0.992**, R_369_0.989*, S_347_0.999**, L_354_0.970*, S_367_0.998**, T_362_0.994**, E_342_0.990**, I_372_0.970*, C_377_0.998**, I_351_0.989*, I_365_0.999**, C_389_0.998**, E_360_0.975*, E_346_0.981*,
ENSGALG00000010818	ENSGALT00000017589	PLPP3	0.001	Lipid transport and metabolism	phosphatidic acid phosphatase type	D_40_0.992**, C_43_0.991**,
ENSGALG00000010850	ENSGALT00000017633	C8A	0.01	Function unknown	Complement component 8, alpha polypeptide	--
ENSGALG00000010889	ENSGALT00000017699	HOOK1	0.001	Cytoskeleton	Hook homolog 1 (Drosophila)	D_12_0.998**, L_16_0.975*, A_6_0.982*, L_9_0.979*,
ENSGALG00000010899	ENSGALT00000017723	G6PC2	0.001	Lipid transport and metabolism	glucose-6-phosphatase, catalytic, 2	T_93_0.997**, S_95_0.996**, W_102_0.998**, F_101_0.950, L_97_0.987*, W_94_0.984*, I_100_0.992**,
ENSGALG00000010938	ENSGALT00000017800	KLHL7	0.001	Posttranslational modification, protein turnover, chaperones	Kelch-like 7 (Drosophila)	P_4_0.957*, M_1_0.980*,
ENSGALG00000010998	ENSGALT00000017909	EFCAB7	0.001	General function prediction only	EF-hand calcium binding domain 7	Q_336_0.967*,
ENSGALG00000011185	ENSGALT00000018238	PLEKHA8	0.001	Intracellular trafficking, secretion, and vesicular transport	Pleckstrin homology domain containing, family A (Phosphoinositide binding specific) member 8	N_431_0.966*, K_430_0.995**, L_418_0.993**, G_414_0.988*,
ENSGALG00000011206	ENSGALT00000018268	KITLG	0.01	Intracellular trafficking, secretion, and vesicular transport	kit ligand	I_219_0.957*,
ENSGALG00000011221	ENSGALT00000018298	AGPAT9	0.001	Lipid transport and metabolism	1-acylglycerol-3-phosphate O-acyltransferase 6 (lysophosphatidic acid acyltransferase, zeta)	W_41_0.979*, A_28_0.972*,
ENSGALG00000011224	ENSGALT00000018302	SLC4A3	0.001	Intracellular trafficking, secretion, and vesicular transport	solute carrier family 4	P_97_0.978*, L_83_0.999**, S_114_0.965*, H_78_0.990*, S_149_0.990*, S_76_0.993**, E_674_0.988*, K_95_0.993**, Q_74_0.984*, K_181_0.988*, H_80_0.998**, G_209_0.995**, E_152_0.992**, Q_94_0.984*, H_77_0.992**, T_113_0.993**, P_82_0.985*, S_89_0.990*, A_90_0.998**, I_79_0.999**, R_96_0.997**, T_75_0.966*, R_73_0.996**, K_92_0.994**, S_84_0.999**,
ENSGALG00000011300	ENSGALT00000018432	TOP2B	0.001	Chromatin structure and dynamics	Control of topological states of DNA by transient breakage and subsequent rejoining of DNA strands. Topoisomerase II makes double-strand breaks (By similarity)	R_504_0.998**, R_506_0.999**, G_488_0.993**, T_482_0.995**, H_477_0.994**, G_500_0.999**, C_481_0.989*, G_503_0.994**, S_497_0.999**, H_524_0.999**, V_509_0.994**, K_476_0.973*, S_523_0.972*, L_499_0.971*, V_501_0.966*, S_490_0.996**, G_508_0.995**, G_475_0.999**, G_498_0.991**, R_513_0.999**, A_522_0.996**, G_514_0.993**,
ENSGALG00000011494	ENSGALT00000018731	CNOT10	0.001	Transcription	CCR4-NOT transcription complex subunit 10	E_260_0.969*, A_250_0.999**, S_275_0.988*, N_274_0.989*, N_258_0.999**, S_252_0.991**, Y_266_0.989*, A_276_0.994**, R_267_0.990*, A_269_0.969*,
ENSGALG00000011498	ENSGALT00000018736	TCAIM	0.001	Function unknown	T cell activation inhibitor, mitochondrial	V_8_0.978*, R_6_0.972*,
ENSGALG00000011689	ENSGALT00000019110	PDIA5	0.001	Posttranslational modification, protein turnover, chaperones	Thioredoxin	P_446_0.999**, A_452_0.998**, E_457_0.991**, E_453_1.000**, F_448_0.999**, D_458_0.998**, R_459_0.994**, C_441_0.997**, A_444_0.996**, W_437_0.995**, N_443_0.997**, F_31_0.999**, T_450_0.998**,
ENSGALG00000011762	ENSGALT00000019202	UBA6	0.001	Coenzyme transport and metabolism	UBA THIF-type NAD FAD binding protein	M_1_0.957*, L_397_0.995**, V_394_0.994**, T_395_0.993**, I_393_0.955*, A_2_0.998**,
ENSGALG00000011794	ENSGALT00000019245	DDX47	0.001	RNA processing and modification	DEAD (Asp-Glu-Ala-Asp) box polypeptide 47	T_401_0.990**, S_26_0.990*, K_28_0.985*,
ENSGALG00000011847	ENSGALT00000019330	TTC26	0.001	Function unknown	tetratricopeptide repeat domain 26	S_4_0.955*, G_11_0.973*,
ENSGALG00000011861	ENSGALT00000019349	SYT16	0.001	General function prediction only	synaptotagmin XVI	--
ENSGALG00000011900	ENSGALT00000019422	NAGA	0.001	Carbohydrate transport and metabolism	alpha-galactosidase	K_325_0.970*, A_246_0.988*, E_366_0.990*,
ENSGALG00000011934	ENSGALT00000019464	DESI1	0.001	Posttranslational modification, protein turnover, chaperones	Desumoylating isopeptidase 1	M_29_0.996**, A_6_0.999**, E_3_0.991**, L_7_0.983*, L_30_0.998**, V_10_0.975*, S_18_1.000**, E_2_0.999**, D_16_0.999**, M_1_0.996**, P_4_0.997**, L_28_0.999**, A_22_1.000**, K_11_0.991**,
ENSGALG00000011990	ENSGALT00000019558	USP53	0.001	Posttranslational modification, protein turnover, chaperones	ubiquitin specific peptidase 53	L_50_0.963*, T_64_0.999**, A_72_0.999**, G_65_0.994**, R_61_0.991**, Q_69_0.999**, G_70_0.999**, Q_52_0.997**, S_59_0.997**, L_78_0.966*, V_67_0.964*, H_66_0.998**, I_55_1.000**,
ENSGALG00000011991	ENSGALT00000019560	MYOZ2	0.001	General function prediction only	Myozenin 2	G_52_0.995**, G_42_0.972*, E_43_0.997**, R_41_0.997**, V_48_0.980*,
ENSGALG00000012000	ENSGALT00000019584	METTL14	0.001	General function prediction only	Methyltransferase-like protein	P_94_0.995**, Q_87_0.993**, E_85_0.993**, Q_88_0.999**, E_97_0.999**, D_82_0.996**, L_93_0.998**, I_99_0.957*,
ENSGALG00000012052	ENSGALT00000019689	SNX4	0.001	Intracellular trafficking, secretion, and vesicular transport	sorting nexin	C_37_0.984*, M_34_0.997**, E_35_0.966*, L_38_0.986*,
ENSGALG00000012129	ENSGALT00000019817	CCDC93	0.01	Function unknown	Coiled-coil domain containing 93	S_616_0.951*,
ENSGALG00000012144	ENSGALT00000019837	MIEF1	0.001	Function unknown	Smith-Magenis syndrome chromosome region, candidate 7-like	N_434_0.999**, S_437_0.999**, L_435_1.000**, E_457_0.999**, Y_452_1.000**, Q_463_0.995**, L_447_0.998**, Y_449_1.000**, V_433_0.998**, E_438_1.000**, T_450_1.000**, S_456_0.991**, E_442_0.998**, D_445_1.000**, E_443_0.998**, T_464_0.999**, E_459_1.000**, S_454_1.000**,
ENSGALG00000012178	ENSGALT00000019885	PDGFB	0.001	Transcription	platelet-derived growth factor beta polypeptide	E_133_0.954*, Q_135_0.993**, V_134_0.995**,
ENSGALG00000012218	ENSGALT00000019954	CBY1	0.001	General function prediction only	chibby homolog 1 (Drosophila)	L_26_0.974*, S_6_0.970*, S_22_0.998**, L_3_0.999**, R_16_0.997**, F_8_0.982*, A_19_0.992**, H_25_0.999**, L_24_0.999**, P_10_1.000**, P_14_0.999**,
ENSGALG00000012546	ENSGALT00000020490	MCM5	0.001	Replication, recombination and repair	dna replication licensing factor	S_604_0.997**, K_583_0.994**, Q_595_0.997**, R_594_0.987*, M_589_0.987*, S_605_0.995**, R_602_0.991**, I_608_0.995**, I_606_0.979*, Q_598_0.995**, K_581_0.975*, E_599_0.998**, E_597_0.981*, V_610_0.990**, Y_586_0.976*,
ENSGALG00000012569	ENSGALT00000020524	FBXO7	0.001	Posttranslational modification, protein turnover, chaperones	F-box protein 7	A_524_0.994**, P_497_0.988*, R_523_0.998**, G_471_0.996**, A_495_0.987*,
ENSGALG00000012618	ENSGALT00000020599	FANCC	0.001	Function unknown	Fanconi anemia, complementation group C	S_389_0.980*,
ENSGALG00000012619	ENSGALT00000020600	PRDM4	0.001	Transcription	May function as a transcription factor involved in cell differentiation (By similarity)	T_298_0.981*, S_332_0.998**, S_297_1.000**, E_369_1.000**, D_346_0.998**, G_341_1.000**, E_337_0.996**, S_325_0.999**, I_334_0.998**, S_348_0.998**, E_362_0.992**, H_309_1.000**, S_306_0.974*, A_349_0.998**, A_295_0.999**, L_319_0.985*, A_312_0.997**, L_326_0.998**, S_358_0.998**, V_355_0.999**, V_329_0.984*, L_287_0.997**, V_338_0.999**, I_291_0.993**, S_357_1.000**, M_296_1.000**, A_304_0.988*,…
ENSGALG00000012681	ENSGALT00000020690	MBOAT1	0.001	Lipid transport and metabolism	membrane bound O-acyltransferase domain containing	H_104_0.984*, G_93_0.990**, P_101_0.993**, I_100_0.986*, I_94_0.987*, L_87_0.994**, S_81_0.991**, V_88_0.963*, H_475_0.970*, S_99_0.993**, N_96_0.997**, M_95_0.977*,
ENSGALG00000012898	ENSGALT00000021033	KIAA1468	0.001	Function unknown	LisH domain and HEAT repeat-containing protein	I_1177_0.987*, T_1170_0.998**, T_1182_0.990**, T_1180_0.989*, E_1185_0.988*, P_1172_0.994**, M_1178_0.961*, I_1168_0.992**, A_1173_0.989*, E_1179_0.988*,
ENSGALG00000012978	ENSGALT00000021177	CDYL2	0.001	Posttranslational modification, protein turnover, chaperones	Chromodomain protein, Y-like 2	D_180_0.973*, S_200_0.988*, S_192_0.994**, S_209_0.999**, N_204_0.986*, Q_177_0.998**, R_168_0.961*, S_197_0.990*, S_167_0.995**, S_208_0.997**, G_171_0.995**, P_201_0.999**, G_205_0.980*, L_194_0.985*, V_203_0.997**, H_163_0.992**, E_187_0.980*, D_183_0.999**, S_174_0.997**, G_207_0.980*,
ENSGALG00000013036	ENSGALT00000021281	ATP6V1E1	0.001	Energy production and conversion	Produces ATP from ADP in the presence of a proton gradient across the membrane (By similarity)	S_4_0.986*, K_10_0.982*,
ENSGALG00000013064	ENSGALT00000021325	NSUN2	0.001	Translation, ribosomal structure and biogenesis	nOP2 Sun	E_105_0.997**, R_99_0.995**, K_96_0.996**,
ENSGALG00000013138	ENSGALT00000021448	TMEM245	0.001	Function unknown	transmembrane protein 245	K_679_1.000**, G_698_0.997**, G_142_0.982*, S_669_1.000**, E_673_0.998**, A_704_1.000**, T_662_1.000**, K_676_1.000**, P_690_1.000**, S_683_0.991**, I_696_0.983*, I_682_1.000**, S_688_0.993**, T_685_0.998**, V_697_0.997**, N_695_1.000**, D_672_0.991**, S_693_1.000**, T_663_0.990*, P_692_0.990**, S_671_0.998**, L_668_0.997**, Q_699_0.996**, L_687_0.999**,
ENSGALG00000013311	ENSGALT00000021741	ANO3	0.001	Intracellular trafficking, secretion, and vesicular transport	Anoctamin	--
ENSGALG00000013576	ENSGALT00000022097	MTNR1A	0.001	Signal transduction mechanisms	Melatonin receptor	L_61_0.999**, T_40_0.989*, R_62_0.999**, V_55_0.997**, I_41_0.984*, K_60_0.984*, V_51_0.999**, L_46_0.978*, Y_56_0.995**, V_42_0.973*, I_52_0.984*, N_58_0.999**, R_57_0.999**, D_44_0.996**, G_47_0.998**, N_63_0.997**,
ENSGALG00000013740	ENSGALT00000022329	SLC20A1	0.01	Inorganic ion transport and metabolism	Solute carrier family 20 (Phosphate transporter), member	--
ENSGALG00000013743	ENSGALT00000022334	ENPP7	0.001	General function prediction only	type i phosphodiesterase nucleotide pyrophosphatase	T_58_0.995**, N_127_0.990**, T_320_0.993**, T_123_0.987*,
ENSGALG00000013950	ENSGALT00000022606	TBCE	0.001	Function unknown	Tubulin folding cofactor E	G_27_0.978*,
ENSGALG00000013962	ENSGALT00000022632	HBS1L	0.001	Translation, ribosomal structure and biogenesis	This protein promotes the GTP-dependent binding of aminoacyl-tRNA to the A-site of ribosomes during protein biosynthesis (By similarity)	M_411_0.976*,
ENSGALG00000014136	ENSGALT00000022870	CNGA1	0.001	Intracellular trafficking, secretion, and vesicular transport	cyclic nucleotide gated channel alpha	K_71_0.989*, T_298_0.968*, K_76_0.972*, K_75_0.965*, S_70_0.962*,
ENSGALG00000014167	ENSGALT00000022912	TTLL12	0.001	Function unknown	tubulin tyrosine ligase-like family, member 12	G_39_0.962*,
ENSGALG00000014170	ENSGALT00000022919	MOGAT2	0.001	Function unknown	o-acyltransferase	N_325_0.999**, K_308_0.998**, K_287_1.000**, V_305_0.987*, K_294_0.955*, E_319_0.997**, I_335_0.998**, V_291_0.955*, E_333_0.998**, D_303_0.998**, K_321_1.000**, E_328_0.992**, L_313_0.998**, S_330_0.962*, V_302_0.998**, E_318_1.000**, V_326_0.997**, E_311_0.960*, H_331_0.997**, E_301_0.998**, L_332_1.000**, Y_324_0.996**, I_289_0.982*, K_323_0.998**,
ENSGALG00000014233	ENSGALT00000023014	FBLN1	0.001	Signal transduction mechanisms	Fibulin 1	G_305_0.997**, S_227_0.955*, L_293_0.992**, P_284_0.997**, C_249_0.998**, P_275_0.999**, T_269_0.999**, Q_301_0.998**, Q_281_1.000**, R_260_0.998**, R_288_1.000**, I_279_0.997**, N_219_1.000**, D_263_0.998**, N_297_0.982*, G_229_0.955*, N_306_0.998**, D_258_1.000**, T_283_0.996**, R_242_0.965*, C_307_0.998**, G_250_0.999**, I_300_0.959*, Q_244_0.998**, C_234_1.000**, E_268_1.000**, C_274_0.998**,…
ENSGALG00000014692	ENSGALT00000023681	LMNB1	0.001	Cell cycle control, cell division, chromosome partitioning ,Nuclear structure ,	Lamin A C	G_392_0.981*, E_264_0.993**, P_391_0.998**, V_397_0.964*, V_132_0.994**, L_387_0.989*, R_396_0.984*, A_402_0.995**, S_403_0.998**,
ENSGALG00000014791	ENSGALT00000023879	WDR3	0.001	General function prediction only	WD repeat domain 3	K_159_0.994**,
ENSGALG00000014798	ENSGALT00000023888	SERINC5	0.001	Intracellular trafficking, secretion, and vesicular transport	Serine incorporator 5	F_423_0.997**, C_298_0.999**, P_348_0.985*, L_341_1.000**, T_334_0.979*, Y_273_0.999**, S_264_1.000**, H_307_1.000**, R_255_0.998**, A_346_1.000**, S_281_0.979*, F_66_0.981*, S_268_1.000**, T_425_0.972*, D_309_0.970*, L_326_0.961*, G_323_1.000**, T_286_0.971*, I_420_0.999**, G_305_0.995**, I_297_1.000**, M_272_0.997**, T_275_0.963*, Q_419_1.000**, K_422_0.999**, Q_304_1.000**, F_302_1.000**, P_28…
ENSGALG00000014799	ENSGALT00000023894	METTL4	0.001	General function prediction only	Methyltransferase like 4	L_107_0.955*, G_128_0.954*, A_432_0.993**, H_170_0.968*,
ENSGALG00000014897	ENSGALT00000024028	TYMS	0.001	Nucleotide transport and metabolism	Provides the sole de novo source of dTMP for DNA biosynthesis (By similarity)	R_53_0.992**, Y_50_0.997**,
ENSGALG00000014939	ENSGALT00000024097	GFM2	0.001	Translation, ribosomal structure and biogenesis	G elongation factor, mitochondrial	V_175_0.996**, K_7_0.976*, K_192_0.977*, F_189_0.984*, C_188_0.977*, T_174_0.996**, K_14_0.955*, L_173_0.987*,
ENSGALG00000015001	ENSGALT00000024193	LAMA4	0.001	Function unknown	Laminin, alpha 4	P_1361_0.997**, F_1355_0.988*, N_1339_0.973*, G_1346_0.993**, K_790_0.965*, Y_1326_0.984*, Q_1366_0.975*, S_1360_0.983*, K_1334_0.998**, L_1362_0.989*, R_1344_0.989*, K_1333_0.998**, D_1343_0.999**, P_1349_0.995**, Q_1365_0.974*, T_1364_0.983*, S_1348_0.996**, P_1340_0.989*, D_779_0.971*, K_1353_0.972*, T_751_0.950*, G_1358_0.993**, A_1345_0.979*,
ENSGALG00000015017	ENSGALT00000024218		0.001	Cytoskeleton	Tubulin is the major constituent of microtubules. It binds two moles of GTP, one at an exchangeable site on the beta chain and one at a non-exchangeable site on the alpha chain (By similarity)	D_358_0.982*, R_351_0.970*, Q_355_0.997**, N_362_0.990*, L_344_0.967*,
ENSGALG00000015045	ENSGALT00000024261		0.001	Carbohydrate transport and metabolism	Major Facilitator Superfamily	I_129_0.975*, F_27_0.998**, A_32_0.974*, S_26_0.954*, P_31_0.993**, W_29_0.994**,
ENSGALG00000015140	ENSGALT00000024430		0.001	Intracellular trafficking, secretion, and vesicular transport	Component of intercellular desmosome junctions. Involved in the interaction of plaque proteins and intermediate filaments mediating cell-cell adhesion (By similarity)	--
ENSGALG00000015309	ENSGALT00000024711	SCML4	0.001	Transcription	sex comb on midleg-like 4 (Drosophila)	M_175_0.990*, E_174_0.999**, Y_171_0.980*, V_176_0.989*, G_173_0.987*,
ENSGALG00000015316	ENSGALT00000024723	C3H6ORF203	0.001	Function unknown	chromosome 6 open reading frame 203	E_147_0.969*, K_145_0.995**,
ENSGALG00000015336	ENSGALT00000024751	CHRNA8	0.001	Intracellular trafficking, secretion, and vesicular transport	Cholinergic receptor, nicotinic, alpha	S_397_0.985*, N_393_0.982*,
ENSGALG00000015397	ENSGALT00000024838	FNTA	0.001	Posttranslational modification, protein turnover, chaperones	(alpha) subunit	T_107_0.958*, R_72_1.000**, I_130_0.995**, A_103_0.999**, F_111_0.968*, V_108_1.000**, K_139_1.000**, R_112_0.966*, N_140_1.000**, K_84_0.997**, T_95_0.999**, Y_124_0.998**, V_114_0.999**, E_135_0.951*, L_123_0.972*, L_115_0.958*, D_97_1.000**, L_101_0.998**, A_132_1.000**, I_99_0.964*, F_71_0.996**, W_144_0.998**, Y_75_0.955*, T_131_1.000**, S_118_0.999**, L_119_1.000**, S_88_1.000**, L_82_0.994…
ENSGALG00000015409	ENSGALT00000024855	PROS1	0.01	Signal transduction mechanisms	Protein S (Alpha)	--
ENSGALG00000015419	ENSGALT00000024871	PENK	0.001	Posttranslational modification, protein turnover, chaperones	proenkephalin	R_28_0.958*, R_6_0.989*, C_33_0.998**, L_11_0.997**, D_29_0.993**, L_7_0.985*, R_21_0.984*, R_23_0.953*, G_8_0.996**, M_1_0.999**, Y_35_0.996**, A_31_0.997**, S_10_0.998**, A_13_0.999**, C_17_0.997**,
ENSGALG00000015551	ENSGALT00000025070	GRIN3A	0.001	Intracellular trafficking, secretion, and vesicular transport	Glutamate receptor, ionotropic, N-methyl-D-aspartate	T_772_0.972*,
ENSGALG00000015593	ENSGALT00000025144	EPHA7	0.001	Signal transduction mechanisms	Serine Threonine protein kinase	E_44_0.992**, Q_42_0.999**, Q_41_0.993**, F_21_0.994**, W_17_0.995**, P_51_0.998**, M_1_0.999**, L_18_0.976*, L_13_0.999**, V_16_0.995**, I_34_0.967*, I_48_0.996**, D_37_0.999**, S_49_0.993**, S_50_0.999**, M_12_0.978*, R_20_0.993**, R_4_0.954*, T_43_0.996**, G_54_0.999**, E_46_0.983*, P_52_0.999**, W_10_0.999**, A_40_0.996**, S_5_0.995**,
ENSGALG00000015624	ENSGALT00000025190	VCAN	0.001	Signal transduction mechanisms	EGF-like domain	--
ENSGALG00000015705	ENSGALT00000025327	WHSC1	0.001	General function prediction only	Histone-lysine N-methyltransferase	S_616_0.998**, K_599_0.962*, S_593_1.000**, E_607_0.995**, D_595_0.995**, N_594_0.977*, S_611_0.996**, T_608_0.998**, A_598_0.994**, Q_615_0.999**, R_590_0.991**, E_591_0.996**, S_610_0.999**, T_597_0.970*, S_609_0.999**, N_601_0.995**, S_602_0.994**,
ENSGALG00000015710	ENSGALT00000025335	TMEM129	0.001	Function unknown	Transmembrane protein 129	L_68_0.989*,
ENSGALG00000016278	ENSGALT00000026244	PRIM2	0.001	Replication, recombination and repair	DNA primase is the polymerase that synthesizes small RNA primers for the Okazaki fragments on both template strands at replication forks during chromosomal DNA synthesis (By similarity)	S_150_0.951*, P_33_0.984*, A_7_0.953*, R_18_0.984*, E_2_0.982*, P_23_0.970*, M_1_0.964*, R_19_0.986*, E_31_0.981*, S_25_0.959*, L_14_0.971*, E_20_0.964*, H_24_0.952*, P_32_0.992**,
ENSGALG00000016300	ENSGALT00000026295	TINAG	0.001	General function prediction only	tubulointerstitial nephritis	G_214_0.962*, H_319_0.960*, N_290_0.961*, E_219_0.975*,
ENSGALG00000016324	ENSGALT00000026335	GSTA4	0.01	Posttranslational modification, protein turnover, chaperones	Glutathione S-Transferase	V_28_0.978*,
ENSGALG00000016377	ENSGALT00000026413	PXDN	0.001	General function prediction only	Peroxidasin homolog	Y_1354_0.951*,
ENSGALG00000016412	ENSGALT00000026473	MBOAT2	0.001	Lipid transport and metabolism	membrane bound O-acyltransferase domain containing	H_98_0.971*, N_26_0.975*,
ENSGALG00000016549	ENSGALT00000026701	CTPS2	0.001	Nucleotide transport and metabolism	Catalyzes the ATP-dependent amination of UTP to CTP with either L-glutamine or ammonia as the source of nitrogen (By similarity)	G_401_0.969*, N_415_0.999**, A_410_0.996**, L_404_0.999**, A_405_0.999**, W_416_0.991**, L_400_0.969*, T_422_0.966*, A_419_1.000**, M_402_0.971*, S_421_0.999**, Q_403_0.999**, C_399_0.995**, V_398_0.999**, N_412_0.997**, L_414_0.996**,
ENSGALG00000016568	ENSGALT00000026743	MOSPD2	0.001	Intracellular trafficking, secretion, and vesicular transport	motile sperm domain containing 2	M_236_0.976*, I_235_0.984*, V_228_0.990**,
ENSGALG00000016676	ENSGALT00000026909	MCM3	0.001	Replication, recombination and repair	dna replication licensing factor	E_15_0.998**, L_13_0.995**, D_26_0.984*, D_10_0.979*, R_14_0.995**, L_24_0.974*, D_19_0.963*, D_22_0.997**,
ENSGALG00000016710	ENSGALT00000026967	CYP39A1	0.001	Secondary metabolites biosynthesis, transport and catabolism	Cytochrome p450	L_50_0.962*, E_54_0.964*, A_56_0.994**,
ENSGALG00000016713	ENSGALT00000026970	PLA2G7	0.001	Lipid transport and metabolism	Phospholipase A2, group VII (Platelet-activating factor acetylhydrolase, plasma)	C_50_0.999**, G_342_0.999**, H_46_0.997**, S_30_0.994**, T_51_0.996**, G_29_0.976*, A_47_0.955*, D_52_0.997**, G_42_0.982*, A_59_0.978*, M_54_0.998**, G_56_0.961*, R_38_0.969*, F_348_1.000**, K_43_0.997**, G_44_0.997**, G_49_0.999**, S_343_0.997**, L_53_0.999**, I_39_0.998**, V_48_1.000**, A_33_0.954*,
ENSGALG00000016727	ENSGALT00000026992	JADE3	0.01	General function prediction only	PHD finger protein	A_43_0.952*,
ENSGALG00000016796	ENSGALT00000027117	C1H2ORF49	0.001	Function unknown	chromosome 2 open reading frame 49	--
ENSGALG00000016801	ENSGALT00000027123	UXS1	0.001	Cell wall/membrane/envelope biogenesis	Nad-dependent epimerase dehydratase	D_49_0.985*, K_72_0.997**, S_54_0.996**,
ENSGALG00000016941	ENSGALT00000027383	PCDH17	0.001	Function unknown	Protocadherin 17	C_6_0.997**, C_7_0.999**, Y_2_0.989*, N_20_0.992**, A_15_0.993**, F_8_0.987*, N_22_0.989*, M_1_0.957*,
ENSGALG00000017009	ENSGALT00000027475	KPNA3	0.01	Intracellular trafficking, secretion, and vesicular transport	importin subunit alpha	--
ENSGALG00000017073	ENSGALT00000027576	BRCA2	0.001	Replication, recombination and repair	breast cancer 2, early onset	D_2845_0.972*,
ENSGALG00000017091	ENSGALT00000027608	FLT1	0.001	Signal transduction mechanisms	Growth factor receptor	--
ENSGALG00000017097	ENSGALT00000027620	MTIF3	0.01	Translation, ribosomal structure and biogenesis	IF-3 binds to the 30S ribosomal subunit and shifts the equilibrum between 70S ribosomes and their 50S and 30S subunits in favor of the free subunits, thus enhancing the availability of 30S subunits on which protein synthesis initiation begins (By similarity)	--
ENSGALG00000017132	ENSGALT00000027676	XPO4	0.001	Intracellular trafficking, secretion, and vesicular transport	exportin 4	P_995_1.000**, I_987_0.998**, Y_983_0.998**, K_1007_0.997**, L_1057_0.998**, P_1034_0.998**, A_1048_0.994**, L_1009_0.999**, C_991_1.000**, L_1051_0.999**, Q_1043_0.997**, L_1001_1.000**, S_1022_0.997**, L_1029_0.998**, C_1028_0.998**, S_1042_0.975*, Q_1038_0.964*, A_1031_0.998**, I_998_0.988*, V_1024_0.997**, K_1041_0.988*, A_1052_1.000**, M_1010_0.992**, S_1018_0.999**, I_990_0.999**, H_1055_1.…
ENSGALG00000017189	ENSGALT00000027775	C1H11ORF70	0.001	Function unknown	chromosome 11 open reading frame 70	F_22_0.983*,
ENSGALG00000017201	ENSGALT00000027803	CEP57	0.001	Cytoskeleton	centrosomal protein	E_261_0.965*, Q_259_0.993**, K_258_0.965*,
ENSGALG00000017202	ENSGALT00000027807	FAM76B	0.001	Function unknown	Family with sequence similarity 76, member	H_177_0.961*, H_176_0.961*, H_184_0.997**, H_189_0.988*, S_185_0.983*, H_178_0.986*, S_186_0.987*,
ENSGALG00000017239	ENSGALT00000027869	CTSC	0.001	Posttranslational modification, protein turnover, chaperones	cysteine	N_221_0.973*,
ENSGALG00000014976	ENSGALT00000031549	GATA6	0.001	Transcription	GATA binding protein	N_237_0.992**, A_236_0.974*,
ENSGALG00000020505	ENSGALT00000032718	KCNJ11	0.01	Inorganic ion transport and metabolism	Potassium inwardly-rectifying channel, subfamily J, member	H_127_0.991**, I_126_0.992**,
ENSGALG00000012348	ENSGALT00000032911	MCM6	0.001	Replication, recombination and repair	dna replication licensing factor	D_33_0.996**,
ENSGALG00000020615	ENSGALT00000032966	STK32C	0.001	Signal transduction mechanisms	Serine threonine kinase	E_279_0.999**, I_288_0.999**, L_294_1.000**, R_281_1.000**, G_310_0.998**, V_312_0.996**, Q_289_0.995**, S_295_0.976*, R_306_0.960*, L_274_0.996**, F_282_0.999**, E_308_1.000**, K_305_0.999**, S_291_0.998**, H_280_1.000**, Q_304_0.996**, L_285_0.957*, V_393_0.999**, A_286_0.997**, S_283_1.000**, V_302_1.000**,
ENSGALG00000010109	ENSGALT00000033170	RNF220	0.001	General function prediction only	ring finger protein 220	N_307_0.955*, F_301_0.991**, R_308_0.976*, T_310_0.996**, T_300_0.995**, V_117_0.996**, A_24_0.989*,
ENSGALG00000006038	ENSGALT00000033354	TGFBR3	0.001	Signal transduction mechanisms	Transforming growth factor, beta receptor III	N_202_0.982*, T_7_0.981*, L_753_0.955*, Y_208_0.979*, I_199_0.995**, V_763_0.991**, S_757_0.966*, N_198_0.997**, V_9_0.988*, S_761_0.954*, S_205_0.995**, C_5_0.979*, K_752_0.976*, K_201_0.998**, V_6_0.989*,
ENSGALG00000008493	ENSGALT00000033408	METTL21A	0.001	General function prediction only	Putative methyltransferase	A_47_0.976*,
ENSGALG00000020879	ENSGALT00000033492	SLC30A7	0.001	Inorganic ion transport and metabolism	solute carrier family 30 (zinc transporter), member	S_59_0.997**, N_60_0.998**, W_58_0.997**,
ENSGALG00000021572	ENSGALT00000034909	SSH2	0.001	Signal transduction mechanisms	Dual specificity protein phosphatase	--
ENSGALG00000003179	ENSGALT00000035033	ANGPTL7	0.001	Function unknown	angiopoietin-like 7	P_30_0.998**, Q_40_0.998**,
ENSGALG00000006097	ENSGALT00000036246	PLXNA1	0.001	Signal transduction mechanisms	Plexin A2	E_604_0.994**, E_610_0.996**, N_600_0.990*, E_614_1.000**, S_602_0.995**, D_615_0.962*, P_1023_0.994**, D_605_1.000**, R_612_0.995**, A_589_1.000**, L_585_0.996**,
ENSGALG00000005688	ENSGALT00000036253	DNASE1L3	0.001	General function prediction only	Deoxyribonuclease	A_250_0.982*, D_254_1.000**, A_258_0.970*, I_252_0.997**, E_239_0.996**, I_234_0.996**, F_259_0.994**, N_251_0.991**, F_253_0.994**, Q_265_1.000**, E_264_1.000**, V_246_0.959*, Q_240_0.955*, E_263_0.997**, M_261_1.000**, S_242_0.996**, S_249_0.998**, S_262_0.970*, G_238_0.999**, Q_243_0.996**, Q_256_0.996**, L_241_0.997**, Q_260_1.000**, F_255_0.997**,
ENSGALG00000015313	ENSGALT00000037269	PDSS2	0.001	Coenzyme transport and metabolism	synthase	R_377_0.952*, A_374_0.996**, L_368_0.951*, A_367_0.998**, R_365_0.978*,
ENSGALG00000014486	ENSGALT00000037304	TAPT1	0.001	Function unknown	transmembrane anterior posterior transformation 1	V_263_0.954*,
ENSGALG00000013143	ENSGALT00000037438	PDE3A	0.001	Signal transduction mechanisms	Phosphodiesterase 3A, cGMP-inhibited	K_175_1.000**, R_134_0.999**, V_166_0.996**, H_177_0.996**, A_164_0.998**, S_173_0.997**, R_144_0.999**, C_352_0.998**, L_158_0.982*, S_341_0.998**, T_365_0.950*, S_353_0.977*, S_338_0.999**, S_182_0.999**, G_360_0.996**, T_152_0.997**, P_163_0.995**, I_371_0.958*, S_183_0.983*, C_363_0.997**, S_136_0.998**, T_263_0.983*, S_147_0.999**, Y_333_0.997**, S_340_0.998**, A_172_0.999**, E_369_0.999**, …
ENSGALG00000011620	ENSGALT00000037443	AKT1	0.001	Signal transduction mechanisms	Serine Threonine protein kinase	I_6_0.995**, E_3_0.991**, E_9_0.993**, L_12_0.976*, A_5_0.960*,
ENSGALG00000013085	ENSGALT00000037455	PTPRO	0.01	Signal transduction mechanisms	protein tyrosine phosphatase	--
ENSGALG00000015544	ENSGALT00000037630	ALDOB	0.001	Carbohydrate transport and metabolism	fructose-bisphosphate aldolase	T_124_0.972*, T_123_0.994**, T_119_0.991**, N_120_0.993**, I_125_0.991**, E_122_0.999**, T_113_0.990*, D_110_0.993**,
ENSGALG00000011427	ENSGALT00000038204	USP37	0.001	Posttranslational modification, protein turnover, chaperones	ubiquitin carboxyl-terminal hydrolase	S_913_0.992**, G_892_0.989*, S_912_0.954*, Y_898_0.999**, S_905_0.996**, L_894_0.996**, V_904_0.995**, S_909_0.999**, S_897_0.993**, P_895_0.994**, R_899_0.994**, H_896_0.999**, H_906_0.991**,
ENSGALG00000008418	ENSGALT00000038363	GYLTL1B	0.001	Function unknown	Glycosyltransferase-like	L_463_0.991**, S_464_0.983*, A_461_0.999**, V_460_0.995**, D_456_0.998**, D_466_0.994**, N_453_0.986*, Q_462_0.998**,
ENSGALG00000006225	ENSGALT00000038669	EFL1	0.001	Translation, ribosomal structure and biogenesis	elongation factor Tu GTP binding domain containing 1	A_26_0.991**, G_11_0.995**, D_29_0.990**, G_7_0.996**, M_9_0.963*, R_20_0.998**, K_15_0.974*, T_4_0.990**, G_18_0.988*, V_861_0.982*, L_25_0.980*, H_30_0.977*,
ENSGALG00000006461	ENSGALT00000038686	UBE3C	0.001	Posttranslational modification, protein turnover, chaperones	e3 ubiquitin protein ligase	G_6_0.986*, F_4_0.995**, S_3_0.968*,
ENSGALG00000000787	ENSGALT00000038723	DHX38	0.01	Replication, recombination and repair	helicase	--
ENSGALG00000009601	ENSGALT00000038787	NELL2	0.001	Signal transduction mechanisms	NEL-like 2 (chicken)	N_232_0.998**, D_266_1.000**, Q_260_0.999**, D_289_0.999**, M_262_1.000**, M_242_0.998**, I_241_0.999**, L_224_0.999**, L_248_0.998**, G_203_1.000**, Q_209_1.000**, T_295_1.000**, D_223_0.999**, L_244_0.999**, I_218_0.998**, K_254_1.000**, K_292_0.985*, R_282_1.000**, N_293_1.000**, N_225_0.998**, A_253_0.998**, F_234_0.988*, C_294_0.999**, K_240_0.998**, Q_239_0.997**, M_213_0.993**, S_286_0.998…
ENSGALG00000006856	ENSGALT00000039051	CD151	0.001	Function unknown	CD151 molecule (Raph blood group)	H_197_0.982*, I_188_0.982*, I_201_0.994**, C_192_0.993**, S_199_0.997**, K_203_0.970*, Y_202_0.996**,
ENSGALG00000005974	ENSGALT00000039669	COL6A1	0.001	Extracellular structures	collagen, type VI, alpha 1	G_363_0.994**, P_355_0.986*, G_360_0.994**, D_361_0.994**, G_357_0.986*, K_371_0.968*,
ENSGALG00000007174	ENSGALT00000040053	TNFSF15	0.001	Signal transduction mechanisms	tumor necrosis factor ligand superfamily member 15	R_29_0.993**, V_34_0.989*, N_55_0.951*, L_42_0.996**, C_62_0.993**, Y_50_0.995**, A_49_0.997**, G_54_0.976*, A_40_0.997**, D_2_0.965*, L_39_0.999**, A_33_0.999**, P_59_0.998**,
ENSGALG00000000498	ENSGALT00000040528	ACE	0.001	Function unknown	peptidyl-dipeptidase A	T_1256_0.990**, Y_485_0.998**, K_170_0.999**, A_490_0.983*, K_484_0.998**, A_503_0.982*, K_504_0.969*, G_487_0.989*, P_512_0.987*, T_483_0.996**, Q_486_0.993**,
ENSGALG00000002314	ENSGALT00000041171	CDHR1	0.001	Function unknown	cadherin-related family member 1	E_597_0.999**, Q_660_0.997**, L_562_0.999**, S_592_0.998**, V_659_0.998**, A_603_1.000**, Q_584_1.000**, S_561_1.000**, R_639_0.997**, I_590_0.953*, H_575_0.998**, G_558_0.999**, I_625_0.987*, K_559_1.000**, Y_637_0.997**, A_598_0.962*, L_20_0.998**, E_604_0.999**, Y_560_0.998**, V_538_0.999**, V_18_0.953*, I_638_1.000**, A_563_0.998**, T_648_0.993**, D_626_1.000**, L_634_0.985*, D_571_0.998**, A…
ENSGALG00000026192	ENSGALT00000042657	ST8SIA4	0.001	Posttranslational modification, protein turnover, chaperones	ST8 alpha-N-acetyl-neuraminide alpha-2,8-sialyltransferase 4	M_1_0.974*,
ENSGALG00000027389	ENSGALT00000043076	RGS7BP	0.001	Signal transduction mechanisms	regulator of G-protein signaling 7 binding protein	D_111_0.992**, Q_107_0.983*,
ENSGALG00000028290	ENSGALT00000043255	C1H21ORF91	0.01	Function unknown	chromosome 21 open reading frame 91	R_209_0.974*,
ENSGALG00000027192	ENSGALT00000043317	NTS	0.001	Posttranslational modification, protein turnover, chaperones	Neurotensin	L_11_0.998**, Q_4_0.995**, A_3_0.960*, C_7_0.999**, L_13_0.999**, S_15_0.985*, L_5_0.998**,
ENSGALG00000025796	ENSGALT00000043545	ADI1	0.001	Function unknown	Catalyzes 2 different reactions between oxygene and the acireductone 1,2-dihydroxy-3-keto-5-methylthiopentene (DHK-MTPene) depending upon the metal bound in the active site. Fe-containing acireductone dioxygenase (Fe-ARD) produces formate and 2-keto-4- methylthiobutyrate (KMTB), the alpha-ketoacid precursor of methionine in the methionine recycle pathway. Ni-containing acireductone dioxygenase (N…	Y_38_0.964*,
ENSGALG00000026790	ENSGALT00000043613	DMRT2	0.01	Transcription	doublesex and mab-3 related transcription factor 2	--
ENSGALG00000011118	ENSGALT00000043913	MIER1	0.001	General function prediction only	Mesoderm induction early response 1 homolog (Xenopus laevis)	E_287_0.984*, C_282_0.996**, F_295_0.986*, E_288_0.993**, A_275_0.989*, N_296_0.995**, R_301_0.999**, L_279_0.996**,
ENSGALG00000026241	ENSGALT00000044002	GRIN3B	0.001	Signal transduction mechanisms	Glutamate receptor, ionotropic, N-methyl-D-aspartate	F_363_0.990*, H_912_0.996**,
ENSGALG00000027184	ENSGALT00000044367	OLFML1	0.01	Intracellular trafficking, secretion, and vesicular transport	olfactomedin-like 1	D_35_0.986*,
ENSGALG00000028041	ENSGALT00000046087	DKK2	0.001	Posttranslational modification, protein turnover, chaperones	dickkopf 2 homolog (Xenopus laevis)	K_8_0.999**, L_13_0.998**, E_23_1.000**, M_5_1.000**, C_9_0.998**, C_11_1.000**, L_14_0.950*, V_22_0.978*, A_17_1.000**, S_24_1.000**, S_10_0.998**, V_3_0.983*, W_6_0.997**, L_20_0.999**,
ENSGALG00000006676	ENSGALT00000046107	RLBP1	0.001	General function prediction only	retinaldehyde binding protein 1	Q_9_0.993**,
ENSGALG00000028627	ENSGALT00000046125	TIMP3	0.001	General function prediction only	TIMP metallopeptidase inhibitor 3	F_11_0.970*, L_20_0.968*,
ENSGALG00000030076	ENSGALT00000046722	PCSK6	0.001	Posttranslational modification, protein turnover, chaperones	proprotein convertase subtilisin kexin type	R_236_0.999**, T_199_0.990**, G_238_0.997**, Y_189_0.994**, Q_104_0.999**, I_228_0.983*, N_208_0.997**, Q_630_0.996**, S_225_0.974*, Q_103_0.970*, V_191_0.997**, V_843_0.993**, E_638_0.997**, P_840_0.988*, D_184_0.999**, N_192_0.998**, E_217_0.992**, S_836_0.999**, N_224_0.997**, W_101_0.998**, V_107_0.997**, T_212_0.996**, Y_233_0.999**, R_213_0.998**, S_629_0.993**, S_188_0.998**, Y_832_0.990**…
ENSGALG00000043092	ENSGALT00000046939	MYH9	0.001	Cytoskeleton	myosin heavy chain	E_1709_0.964*, D_1708_0.963*, G_1715_0.965*, A_1711_0.963*, K_1716_0.966*, S_1714_0.986*, N_1712_0.971*, A_1707_0.968*, L_1706_0.980*,
ENSGALG00000042548	ENSGALT00000046977	LRRC6	0.001	Signal transduction mechanisms	leucine rich repeat containing 6	G_224_0.980*, K_269_0.999**, S_394_0.976*, R_273_0.996**, K_267_0.989*, D_270_0.986*, R_266_0.969*, P_393_0.953*,
ENSGALG00000037553	ENSGALT00000047348	SEC11A	0.001	Intracellular trafficking, secretion, and vesicular transport	Signal peptidase i	--
ENSGALG00000037962	ENSGALT00000047798	C1H21ORF59	0.001	Function unknown	Chromosome 21 open reading frame 59	L_27_0.968*, A_25_0.978*, V_41_0.994**, L_15_0.976*, F_14_0.997**, I_34_0.976*, L_24_0.985*, C_45_0.992**, L_16_0.975*,
ENSGALG00000007839	ENSGALT00000047809	NCAM1	0.001	Intracellular trafficking, secretion, and vesicular transport	Neural cell adhesion molecule 1	Q_403_0.992**, V_360_0.998**, H_364_0.999**, I_359_0.987*, T_354_0.998**, E_382_0.998**, T_371_0.999**, D_394_0.999**, C_385_0.998**, R_362_0.998**, V_402_0.983*, S_369_0.997**, A_397_1.000**, E_374_0.997**, S_368_0.999**, G_357_0.983*, S_388_0.999**, Q_393_0.996**, A_387_0.999**, L_400_0.997**, Q_396_0.997**, T_386_0.973*, R_366_0.998**, S_363_1.000**, M_398_0.998**, L_355_0.996**, Q_376_1.000**,
ENSGALG00000013124	ENSGALT00000048163	FHOD3	0.001	Function unknown	Formin Homology 2 Domain containing	E_654_0.972*, E_652_0.960*,
ENSGALG00000014740	ENSGALT00000048312	IPO11	0.001	Posttranslational modification, protein turnover, chaperones	Importin	G_199_0.957*, A_460_0.992**, C_262_0.990**, N_455_0.996**, R_263_0.956*, K_268_0.987*, L_272_0.964*, A_461_0.966*,
ENSGALG00000040048	ENSGALT00000048368	PRPF19	0.001	RNA processing and modification	PRP19 PSO4 pre-mRNA processing factor 19 homolog (S. cerevisiae)	L_204_0.987*, H_213_0.993**, Y_207_0.995**,
ENSGALG00000015248	ENSGALT00000048577	SNTG1	0.001	Posttranslational modification, protein turnover, chaperones	syntrophin, gamma	Q_438_0.998**, D_458_0.992**, Q_455_0.990*, E_463_0.988*, L_453_0.979*, G_441_0.999**, S_437_0.998**, I_450_0.996**, S_442_0.999**, P_457_0.952*, S_443_0.967*, G_446_0.987*, I_462_0.967*, D_444_0.972*, Q_461_0.990*,
ENSGALG00000009466	ENSGALT00000048975	SEC23IP	0.001	General function prediction only	Sec-23 interacting protein	--
ENSGALG00000038853	ENSGALT00000049307	GAA	0.001	Carbohydrate transport and metabolism	hydrolase, family 31	Q_502_0.995**, F_345_0.992**, M_211_0.998**, M_138_0.997**, P_354_0.994**, N_136_0.997**, G_129_0.989*, N_495_0.997**, S_343_0.997**, S_135_0.998**, C_478_0.952*, P_217_0.998**, E_359_0.999**, F_131_0.992**, Y_488_0.991**, E_341_0.999**, N_134_0.996**, G_597_0.996**, N_344_0.993**, F_490_0.999**, F_216_0.995**, N_210_0.985*, D_554_0.999**, Y_593_0.994**, N_340_0.991**, E_503_0.997**, D_355_0.967*,
ENSGALG00000003365	ENSGALT00000049619	RAD1	0.001	Replication, recombination and repair	RAD1 homolog (S. pombe)	L_118_0.985*, Y_114_0.984*, Y_111_0.986*, T_105_0.997**, G_115_0.990*,
ENSGALG00000039705	ENSGALT00000049899	GFPT2	0.001	Cell wall/membrane/envelope biogenesis	Catalyzes the first step in hexosamine metabolism, converting fructose-6P into glucosamine-6P using glutamine as a nitrogen source (By similarity)	E_76_0.998**, K_72_0.997**, D_67_0.999**, K_552_0.999**,
ENSGALG00000040493	ENSGALT00000049974	PTN	0.001	Signal transduction mechanisms	Pleiotrophin	E_161_1.000**, E_149_0.991**,
ENSGALG00000021365	ENSGALT00000050026	DCTN3	0.001	Cytoskeleton	dynactin 3 (p22)	T_156_0.959*, K_155_0.982*, L_150_0.972*, C_139_0.950*, E_140_0.969*, K_147_0.999**, Y_153_0.999**,
ENSGALG00000016191	ENSGALT00000050498	PKNOX1	0.001	Transcription	Pbx knotted 1 homeobox	L_160_0.967*, G_162_0.990**, S_166_0.994**, S_161_0.955*, S_169_0.992**, Y_168_0.991**, S_173_0.993**, E_163_0.960*, P_170_0.998**, G_165_0.994**,
ENSGALG00000038097	ENSGALT00000050519	EI24	0.001	Function unknown	Etoposide induced 2.4 mRNA	K_6_0.996**, D_11_1.000**, D_3_0.999**, L_12_0.999**, R_14_0.994**, M_1_1.000**, S_4_0.999**, H_10_0.998**, V_13_0.999**,
ENSGALG00000040087	ENSGALT00000050706	ZNF609	0.001	General function prediction only		M_1256_1.000**, D_1243_1.000**, S_1237_0.999**, Y_1242_0.992**, T_1254_0.988*, I_1230_0.996**, M_1233_1.000**, N_1245_0.998**, Q_1240_0.999**, Y_1238_0.996**, R_1250_0.996**, Y_1232_0.999**, V_1255_0.997**, E_324_1.000**, Y_1236_1.000**, M_1252_1.000**, N_1259_0.994**, P_1231_0.996**, H_1234_0.998**, Q_1258_0.999**, S_1239_0.997**, S_1248_0.997**,
ENSGALG00000010182	ENSGALT00000050819	SLC29A1	0.001	General function prediction only	solute carrier family 29 (nucleoside transporters), member	G_409_0.965*,
ENSGALG00000039333	ENSGALT00000050951	SLC6A20	0.001	Inorganic ion transport and metabolism	Transporter	I_100_0.977*, G_97_0.999**, I_104_0.998**,
ENSGALG00000034965	ENSGALT00000051061	DIP2B	0.001	Lipid transport and metabolism	Amp-dependent synthetase and ligase	F_216_0.969*,
ENSGALG00000031474	ENSGALT00000051177	ZRANB1	0.001	Posttranslational modification, protein turnover, chaperones	zinc finger, RAN-binding domain containing 1	K_563_0.996**, R_574_0.998**, G_567_0.998**, G_571_0.998**, H_548_1.000**, I_543_0.996**, H_542_0.978*, F_565_1.000**, K_560_1.000**, L_570_0.998**, Q_576_0.996**, I_555_0.963*, I_554_0.997**, S_564_0.971*,
ENSGALG00000010017	ENSGALT00000051293	MCFD2	0.001	Posttranslational modification, protein turnover, chaperones	multiple coagulation factor deficiency 2	F_6_0.950, A_17_0.983*,
ENSGALG00000037875	ENSGALT00000051328	RBP1	0.001	General function prediction only	retinol binding protein 1, cellular	T_108_0.984*, E_103_0.983*, Q_109_0.999**, D_15_0.983*, R_105_0.999**, G_106_0.999**, W_107_0.999**, L_44_0.983*, D_104_0.999**,
ENSGALG00000002336	ENSGALT00000051482		0.001	General function prediction only	Snf2-related CREBBP activator protein	--
ENSGALG00000035839	ENSGALT00000051504	TMEM255B	0.001	Function unknown	family with sequence similarity 70, member B	P_253_0.989*, A_246_0.986*, L_284_0.972*,
ENSGALG00000029672	ENSGALT00000051888	ABCB6	0.001	Secondary metabolites biosynthesis, transport and catabolism	ATP-binding cassette, subfamily B (MDR TAP), member 6	I_597_1.000**, S_616_0.969*, I_613_0.999**, Q_558_0.990**, E_641_0.991**, F_592_0.999**, V_549_1.000**, L_568_1.000**, F_606_0.955*, S_550_0.999**, T_594_0.972*, G_587_1.000**, L_603_1.000**, N_557_0.997**, D_619_0.999**, N_622_0.999**, W_605_0.996**, L_644_0.995**, G_554_0.998**, Q_614_0.999**, L_553_0.995**, I_564_1.000**, S_552_1.000**, E_621_0.998**, V_586_0.955*, F_589_0.997**, L_556_0.999**…
ENSGALG00000042123	ENSGALT00000051963	CLDN23	0.001	Intracellular trafficking, secretion, and vesicular transport	Claudin 23	S_171_0.991**,
ENSGALG00000005070	ENSGALT00000052471	AP3M1	0.001	Intracellular trafficking, secretion, and vesicular transport	adaptor-related protein complex 3, mu	T_331_0.991**, S_329_0.997**, V_308_0.998**, G_296_0.997**, S_288_0.989*, G_289_0.998**, K_337_0.994**, K_316_0.999**, A_325_1.000**, I_295_0.999**, M_321_0.998**, L_319_0.998**, V_293_0.999**, G_302_0.961*, M_301_0.991**, V_305_0.951*, S_287_0.999**, D_292_0.999**, Q_299_1.000**, T_311_0.999**, D_333_0.999**, Q_327_1.000**, A_317_1.000**, M_314_0.999**, V_309_0.998**, V_318_0.950*, T_336_1.000**…
ENSGALG00000001551	ENSGALT00000052575	CCNL2	0.001	Cell cycle control, cell division, chromosome partitioning ,Transcription ,Replication, recombination and repair ,	Component of the SRB8-11 complex. The SRB8-11 complex is a regulatory module of the Mediator complex which is itself involved in regulation of basal and activated RNA polymerase II- dependent transcription. The SRB8-11 complex may be involved in the transcriptional repression of a subset of genes regulated by Mediator. It may inhibit the association of the Mediator complex with RNA polymerase II …	S_477_0.998**, S_448_0.994**,
ENSGALG00000015006	ENSGALT00000052620	MAB21L3	0.001	Posttranslational modification, protein turnover, chaperones	mab-21-like 3 (C. elegans)	W_287_0.996**, T_284_1.000**, C_289_0.998**, Y_323_1.000**, K_303_0.995**, D_328_0.999**, L_321_0.987*, K_280_1.000**, E_279_0.990**, W_276_0.997**, H_302_1.000**, F_275_0.997**, L_295_1.000**, S_306_1.000**, R_288_0.999**, T_277_0.964*, V_315_0.976*, K_311_0.994**, T_318_1.000**, H_312_0.997**, T_272_0.996**, F_294_0.996**, L_297_0.988*, N_317_1.000**, Y_313_0.996**, Y_281_0.997**, V_273_0.987*,…
ENSGALG00000036492	ENSGALT00000053293	DAGLA	0.01	Lipid transport and metabolism	diacylglycerol lipase	--
ENSGALG00000012156	ENSGALT00000053358	DPP10	0.001	Amino acid transport and metabolism	peptidase s9 prolyl oligopeptidase active site domain protein	K_150_0.980*, D_148_0.993**, A_146_0.967*,
ENSGALG00000039254	ENSGALT00000053407	SLC17A6	0.001	Carbohydrate transport and metabolism	Transporter	I_140_0.989*, R_148_0.985*, N_152_0.986*, Y_144_0.986*,
ENSGALG00000036798	ENSGALT00000053661	COL4A1	0.001	General function prediction only	collagen, type	--
ENSGALG00000035282	ENSGALT00000053800	IGF2	0.001	Signal transduction mechanisms	insulin-like growth factor 2 (somatomedin A)	A_182_0.982*, R_163_0.990**, S_170_0.993**, R_144_0.956*, L_152_0.997**, T_183_0.973*, A_160_0.992**, Y_145_0.997**, A_155_0.999**, A_158_0.996**, R_143_0.999**, A_154_0.997**,
ENSGALG00000041473	ENSGALT00000054949	DDX31	0.001	Cytoskeleton	atp-dependent rna helicase	K_552_0.975*, Y_542_0.994**, K_531_0.953*, E_541_0.973*, E_536_0.978*, S_544_0.951*, G_545_0.993**, L_538_0.964*, M_546_0.962*, A_535_0.970*, R_539_0.987*, S_543_0.988*,
ENSGALG00000038933	ENSGALT00000055113	FABP7	0.01	Lipid transport and metabolism	fatty acid binding protein 7, brain	Y_20_0.967*, L_24_0.952*,
ENSGALG00000037371	ENSGALT00000055160	TMEM65	0.001	Function unknown	Transmembrane protein 65	G_67_0.997**, M_74_0.999**, E_43_0.998**, A_76_0.981*, Q_51_0.998**, P_46_0.998**, A_77_0.985*, I_73_0.995**, L_42_0.992**, L_52_0.997**, H_58_0.990**, A_72_0.980*, G_65_0.997**,
ENSGALG00000034264	ENSGALT00000055604		0.001	Function unknown	Mitochondrial ribonuclease p protein	--
ENSGALG00000042809	ENSGALT00000055606	NDUFV1	0.001	Energy production and conversion	Nadh dehydrogenase	V_391_0.995**, A_393_0.969*, F_395_0.997**, V_396_0.989*,
ENSGALG00000035667	ENSGALT00000055828	NOC3L	0.001	Translation, ribosomal structure and biogenesis ,Intracellular trafficking, secretion, and vesicular transport ,	nucleolar complex associated 3 homolog (S. cerevisiae)	E_176_0.994**, E_183_0.994**,
ENSGALG00000031578	ENSGALT00000055882	CSMD3	0.001	General function prediction only	sushi, von Willebrand factor type A, EGF and pentraxin domain containing 1	S_3385_0.969*, K_3367_0.963*, R_3374_0.971*, G_3365_0.975*, I_3368_0.971*,
ENSGALG00000039172	ENSGALT00000056474	ASPSCR1	0.001	Posttranslational modification, protein turnover, chaperones	Alveolar soft part sarcoma chromosome region, candidate 1	S_378_0.953*,
ENSGALG00000040266	ENSGALT00000056531	GLI3	0.001	General function prediction only	GLI family zinc finger	K_698_0.994**, K_679_0.998**, R_688_0.996**, M_703_0.981*, G_673_0.967*, C_691_0.979*, Q_678_0.995**, K_695_0.955*, L_681_0.978*, Q_693_0.974*, A_674_0.991**, K_701_0.996**, S_686_0.982*, G_676_0.974*,
ENSGALG00000032517	ENSGALT00000056826		0.001	Lipid transport and metabolism	Tyrosinase-related protein 1	N_95_0.982*, R_355_0.980*, Q_123_0.969*, E_359_0.979*, S_122_0.967*,
ENSGALG00000008127	ENSGALT00000057017	SPI1	0.001	Transcription	spleen focus forming virus (SFFV) proviral integration oncogene spi1	K_6_0.992**, Q_3_0.993**, M_7_0.993**, P_15_0.999**, P_14_0.998**, E_8_0.999**, M_1_0.993**, A_4_0.998**,
ENSGALG00000029983	ENSGALT00000057472	ANGPT1	0.001	Cytoskeleton	Angiopoietin 1	L_97_0.997**, Q_95_0.966*, Y_93_0.991**, M_90_0.999**, Q_98_0.999**,
ENSGALG00000038155	ENSGALT00000057587	AP3M2	0.001	Intracellular trafficking, secretion, and vesicular transport	adaptor-related protein complex 3, mu	T_89_0.982*, D_88_0.988*, F_90_0.997**,
ENSGALG00000031009	ENSGALT00000058310	ARHGEF7	0.001	Signal transduction mechanisms	guanine nucleotide exchange factor (GEF)	--
ENSGALG00000032840	ENSGALT00000058745	LYST	0.001	General function prediction only	beige BEACH domain containing protein	Q_2684_0.996**, Q_2683_0.960*, E_2654_0.997**, E_2653_0.998**, R_2669_0.996**, N_2691_0.986*, P_2678_0.973*, A_2665_0.955*, A_2083_0.962*, E_2676_0.996**, E_2681_0.998**, A_2672_0.975*, Q_2667_0.996**, E_2679_0.960*, S_2651_0.997**, C_2655_0.994**, G_2660_0.994**, S_2673_0.993**,
ENSGALG00000002546	ENSGALT00000059123	COL5A1	0.001	General function prediction only	collagen, type	N_890_0.992**, R_896_0.975*, S_1333_1.000**, P_1334_0.964*, E_892_0.992**, K_893_0.998**, G_1332_0.995**, D_1328_0.996**, G_1329_0.995**, K_1331_0.999**,
ENSGALG00000043415	ENSGALT00000059612		0.001	General function prediction only	acid PHOsphatase	C_14_0.966*, I_12_0.963*, L_23_0.957*, F_17_0.968*, G_2_0.952*,
ENSGALG00000017276	ENSGALT00000059620		0.001	Signal transduction mechanisms	Guanine nucleotide exchange factor	--
ENSGALG00000002709	ENSGALT00000059624	MYO1C	0.001	Cytoskeleton	Myosin ID	T_514_0.992**, R_515_0.997**, K_516_0.993**, E_522_0.992**, E_521_0.991**, L_518_0.952*,
ENSGALG00000037402	ENSGALT00000059653	CTGF	0.001	RNA processing and modification	connective tissue growth factor	C_90_0.995**, G_88_0.997**, I_87_0.962*, V_89_0.995**,
ENSGALG00000002335	ENSGALT00000059778	DOCK3	0.001	Signal transduction mechanisms	dedicator of cyto-kinesis	--
ENSGALG00000012098	ENSGALT00000060501	NAA30	0.001	General function prediction only	-acetyltransferase	M_46_0.987*,
ENSGALG00000034380	ENSGALT00000060746	C7orf26	0.001	Function unknown	chromosome 7 open reading frame 26	R_378_0.986*, P_380_0.978*, T_374_0.961*, S_377_0.998**, H_381_0.995**, V_375_0.983*,
ENSGALG00000016391	ENSGALT00000061072	CNKSR2	0.001	Signal transduction mechanisms	connector enhancer of kinase suppressor of Ras 2	Q_895_0.998**, Q_873_0.996**, A_890_0.996**, E_884_0.981*, D_897_0.975*,
ENSGALG00000036527	ENSGALT00000061188	SYBU	0.001	Function unknown	syntabulin (syntaxin-interacting)	--
ENSGALG00000014869	ENSGALT00000061210	NNT	0.001	Energy production and conversion	The transhydrogenation between NADH and NADP is coupled to respiration and ATP hydrolysis and functions as a proton pump across the membrane (By similarity)	F_296_0.965*, T_216_0.997**, A_261_0.999**, E_272_0.996**, I_232_0.997**, A_289_0.998**, L_269_0.998**, A_243_0.998**, E_300_0.995**, K_267_0.999**, A_246_0.997**, L_240_0.985*, Q_285_0.997**, A_203_0.998**, A_228_0.998**, V_230_0.972*, V_225_0.999**, K_202_0.993**, E_298_1.000**, G_234_0.999**, P_227_0.999**, G_235_0.984*, G_244_0.988*, M_249_0.991**, A_262_1.000**, Q_218_0.999**, E_280_0.996**,…
ENSGALG00000033834	ENSGALT00000061383	TRIP13	0.001	Posttranslational modification, protein turnover, chaperones	Aaa atpase	K_378_0.992**, L_357_0.983*, R_372_0.961*, S_381_0.959*, S_374_0.994**, Q_352_0.991**, N_369_0.981*, C_345_0.991**, R_358_0.952*,
ENSGALG00000035699	ENSGALT00000061752	2006-03-01	0.001	RNA processing and modification	(Membrane-Associated Ring finger (C3HC4))	--
ENSGALG00000032732	ENSGALT00000062019	KIAA0196	0.001	Function unknown	WASH complex subunit	--
ENSGALG00000034967	ENSGALT00000062021	GDPD5	0.001	Energy production and conversion	glycerophosphoryl diester phosphodiesterase	L_265_0.988*,
ENSGALG00000040131	ENSGALT00000062406	CAMKK2	0.001	Signal transduction mechanisms	Calcium calmodulin-dependent protein kinase kinase	E_50_0.998**, A_46_0.990**, E_49_0.999**, E_48_0.995**, I_37_0.987*,
ENSGALG00000009730	ENSGALT00000062914	SLC38A4	0.001	Amino acid transport and metabolism	Solute carrier family 38 member	M_241_0.971*,
ENSGALG00000000870	ENSGALT00000063555	DCAKD	0.001	Coenzyme transport and metabolism	Catalyzes the phosphorylation of the 3'-hydroxyl group of dephosphocoenzyme A to form coenzyme A (By similarity)	--
ENSGALG00000030173	ENSGALT00000063992	WNT2	0.01	Signal transduction mechanisms	Ligand for members of the frizzled family of seven transmembrane receptors (By similarity)	G_114_0.981*,
ENSGALG00000043826	ENSGALT00000064801	ANXA11	0.001	Function unknown	annexin A7	E_425_0.992**, L_441_0.999**, D_455_0.986*, G_433_0.996**, R_448_0.998**, P_420_0.998**, T_440_0.973*, D_471_0.996**, S_467_0.991**, S_447_0.998**, N_429_0.958*, A_458_0.998**, G_435_0.998**, R_439_0.991**, S_449_0.999**, M_431_0.982*, K_437_0.999**, G_465_0.993**, I_442_0.974*, T_419_0.991**, A_430_0.994**, D_438_0.994**, R_443_0.995**, A_470_0.977*, K_461_0.999**, A_421_0.992**, M_445_0.979*, L…
ENSGALG00000042552	ENSGALT00000065033	TJP1	0.001	Signal transduction mechanisms	Tight junction protein	K_254_0.993**, D_215_0.999**, K_258_0.988*, V_209_0.994**, S_281_0.991**, E_239_0.999**, R_263_0.987*, L_257_0.989*, L_269_0.994**, I_250_0.981*, L_201_0.985*, S_276_0.995**, D_245_0.999**, S_205_0.999**, A_267_0.993**, L_203_0.987*, S_253_0.990*, S_285_0.954*, R_266_0.999**, S_213_0.998**, G_235_0.999**, N_271_0.996**, L_249_0.986*, E_198_0.981*, N_240_0.996**, D_288_0.999**, G_200_0.998**, A_21…
ENSGALG00000042469	ENSGALT00000065303	PRKDC	0.001	Chromatin structure and dynamics ,Cell cycle control, cell division, chromosome partitioning ,Replication, recombination and repair ,Signal transduction mechanisms ,Intracellular trafficking, secretion, and vesicular transport ,	3-kinase, catalytic subunit	--
ENSGALG00000037408	ENSGALT00000066470	ADMP	0.001	Function unknown	Transforming growth factor beta like domain	E_86_0.988*, M_88_0.999**,
ENSGALG00000041993	ENSGALT00000067097	UGDH	0.001	Cell wall/membrane/envelope biogenesis	Udp-glucose 6-dehydrogenase	G_340_0.985*, K_345_0.988*, R_316_0.994**, A_320_0.957*, F_328_0.977*, S_321_0.994**, D_325_0.985*, I_323_0.953*, F_343_0.996**, S_326_0.997**, I_324_0.966*, V_331_0.978*,
ENSGALG00000038217	ENSGALT00000067157	CD82	0.001	Function unknown	CD82 molecule	--
ENSGALG00000042419	ENSGALT00000067504		0.01	General function prediction only	potassium channel tetramerisation domain containing	E_17_0.956*,
ENSGALG00000010049	ENSGALT00000067809		0.001	Signal transduction mechanisms	protein tyrosine phosphatase	P_1740_0.988*, G_1731_0.989*, S_1706_0.975*, H_1689_0.970*, C_1721_0.976*, D_1700_0.996**, K_1713_0.984*, Y_1735_0.993**, D_1722_0.997**, K_1732_0.997**, K_1707_0.991**, S_1688_0.997**, Y_1709_0.971*, A_1699_0.981*, D_1714_0.975*, I_1723_0.995**, R_1730_0.995**, Y_1703_0.993**, T_1720_0.977*, N_1736_0.985*, K_1686_0.986*, D_1711_0.998**,
ENSGALG00000041821	ENSGALT00000067961	NAA25	0.01	Function unknown	N-alpha-acetyltransferase 25, NatB auxiliary subunit	--
ENSGALG00000037387	ENSGALT00000068250	CLSTN2	0.001	Extracellular structures	CAlSYntenin	E_802_0.989*, S_811_0.989*, E_808_0.963*, K_803_0.987*, E_810_0.978*, E_812_0.996**, E_813_0.981*, E_809_0.996**, E_814_0.986*,
ENSGALG00000039169	ENSGALT00000068346	MLH1	0.001	Replication, recombination and repair	This protein is involved in the repair of mismatches in DNA. It is required for dam-dependent methyl-directed DNA mismatch repair. May act as a molecular matchmaker , a protein that promotes the formation of a stable complex between two or more DNA-binding proteins in an ATP-dependent manner without itself being part of a final effector complex (By similarity)	E_171_0.994**, I_150_0.950*, E_178_0.999**, A_174_0.998**, T_148_0.999**, I_176_0.963*, S_131_0.990**, D_154_0.966*, L_166_0.995**, R_163_0.983*, P_139_0.998**, E_172_0.983*, Q_146_0.989*, Y_173_0.999**, Y_157_0.988*, G_181_0.958*, P_141_0.993**, A_143_0.994**, N_158_0.990*, T_161_0.993**, R_182_0.991**, Q_149_0.999**, G_147_0.985*, S_129_0.958*, K_164_0.992**, N_160_0.999**,
ENSGALG00000038637	ENSGALT00000068656		0.001	Signal transduction mechanisms	Src homology 2 domain containing	Q_70_1.000**, W_74_0.998**, E_73_1.000**, F_83_1.000**, K_81_0.996**, T_119_0.953*, D_45_0.970*, K_75_1.000**, C_49_1.000**, Y_68_0.998**, P_47_0.997**, E_77_0.981*, R_53_0.997**, R_78_0.998**, I_36_0.973*, D_60_0.997**, E_67_1.000**, E_54_0.999**, A_84_0.998**, S_55_0.999**, W_72_0.988*, R_63_0.999**, K_76_1.000**, D_69_0.999**, I_79_0.985*, L_57_0.954*,
ENSGALG00000035360	ENSGALT00000068690	XPO6	0.001	Intracellular trafficking, secretion, and vesicular transport	Exportin 6	N_70_0.969*, I_72_0.970*,
ENSGALG00000037872	ENSGALT00000069055	ATAD2B	0.001	Posttranslational modification, protein turnover, chaperones	Aaa atpase	S_212_1.000**, R_186_0.998**, E_206_0.998**, D_181_0.950*, M_180_1.000**, R_198_0.999**, M_210_0.999**, R_196_1.000**, N_224_0.999**, N_207_0.999**, F_205_1.000**, E_241_0.998**, V_194_0.991**, W_200_0.993**, E_239_1.000**, Q_229_0.998**, E_204_0.994**, K_215_1.000**, S_191_0.999**, I_228_0.954*, D_202_0.999**, R_222_0.998**, Y_226_1.000**, E_193_0.998**, T_203_0.999**, I_185_0.998**, K_219_1.000…
ENSGALG00000038858	ENSGALT00000069170	ZFP64	0.001	General function prediction only	zinc finger protein 64 homolog (mouse)	I_96_0.994**, Q_94_0.988*, T_97_0.987*,
ENSGALG00000031821	ENSGALT00000069189	C15H12ORF49	0.001	Function unknown	chromosome 12 open reading frame 49	L_8_0.987*, M_1_0.993**, V_7_0.995**,
ENSGALG00000003446	ENSGALT00000069274	PRLR	0.001	Signal transduction mechanisms	Prolactin receptor	M_456_0.965*,
ENSGALG00000036172	ENSGALT00000069444		0.001	Amino acid transport and metabolism	Catalyzes the hydrolysis of N-succinyl-L,L- diaminopimelic acid (SDAP), forming succinate and LL-2,6- diaminoheptanedioate (DAP), an intermediate involved in the bacterial biosynthesis of lysine and meso-diaminopimelic acid, an essential component of bacterial cell walls (By similarity)	G_413_0.955*, E_412_0.994**, I_357_0.990**, A_359_0.960*,
ENSGALG00000008684	ENSGALT00000069706	EIF4A2	0.001	Replication, recombination and repair	atp-dependent rna helicase	R_354_0.998**, Y_357_0.994**, S_343_0.993**, N_356_0.996**, P_351_0.999**, L_344_0.995**, Q_340_0.999**, H_359_0.993**, E_355_0.999**, I_358_0.979*,
ENSGALG00000041791	ENSGALT00000070390	DPP6	0.001	Amino acid transport and metabolism	peptidase s9 prolyl oligopeptidase active site domain protein	Y_141_0.992**, Q_148_0.983*, G_146_0.999**, V_160_0.999**, N_138_0.996**, E_136_0.995**, E_171_0.995**, V_153_0.994**, A_143_0.994**, G_164_0.999**, N_137_0.994**, R_151_0.998**, T_155_0.999**, I_132_0.965*, S_154_0.999**, W_168_0.989*, A_149_0.994**, L_165_0.999**, I_134_0.993**, T_444_0.966*, K_157_0.992**, D_167_0.995**,
ENSGALG00000033772	ENSGALT00000070595	UPF2	0.001	RNA processing and modification	Regulator of nonsense transcripts	S_1061_0.989*, K_70_0.982*, A_117_0.989*, E_1059_0.996**, G_1026_0.988*, E_115_0.981*, E_1030_0.971*, E_1041_0.998**, E_1036_0.994**, E_1035_0.988*, R_65_0.997**, E_1073_0.998**, E_1065_0.997**, K_57_0.971*, K_64_0.975*, L_120_0.997**, D_69_0.955*, K_59_0.997**, A_118_0.984*, G_1068_0.981*, K_66_0.995**, E_1027_0.985*,
ENSGALG00000033500	ENSGALT00000070690	PDCD6IP	0.001	Intracellular trafficking, secretion, and vesicular transport	Programmed cell death 6 interacting protein	E_655_0.996**, A_636_0.994**, E_65_0.961*, T_678_0.998**, E_654_0.963*, L_674_0.950, R_653_0.986*, S_650_0.989*, S_646_0.992**, A_663_0.988*, A_672_0.998**, V_656_0.959*, E_649_0.987*, N_659_0.988*, A_810_0.993**, L_671_0.974*, N_664_0.989*, H_60_0.969*, L_660_0.968*, K_658_0.999**, Q_638_0.979*, K_675_0.996**, L_657_0.995**, M_643_0.999**, N_846_0.999**,
ENSGALG00000029842	ENSGALT00000070804	SLCO5A1	0.001	Inorganic ion transport and metabolism	Solute carrier organic anion transporter family, member	M_418_1.000**, K_288_0.992**, V_280_1.000**, L_360_0.998**, R_373_0.999**, E_374_0.988*, K_369_1.000**, Y_363_0.997**, A_419_0.990**, G_357_0.995**, K_269_0.996**, S_278_0.997**, L_370_0.997**, V_265_0.997**, M_266_0.999**, D_262_1.000**, H_420_0.997**, E_472_0.999**, D_263_0.998**, A_282_0.999**, L_416_0.995**, S_272_0.997**, N_469_0.995**, T_415_0.999**, A_279_0.985*, V_356_0.989*, A_354_0.998*…
ENSGALG00000036001	ENSGALT00000071129	MADH2	0.001	Transcription	SMAD family member	R_337_0.994**,
ENSGALG00000031495	ENSGALT00000071221	TRIO	0.001	Signal transduction mechanisms	RHo Guanine nucleotide exchange Factor	V_2322_0.993**, S_2279_0.999**, L_2301_0.956*, Y_2274_0.991**, S_2305_0.998**, Q_2331_0.993**, N_2277_0.994**, Q_2275_0.992**, G_2281_0.994**, E_2273_0.996**, L_2268_0.997**, R_2276_0.989*, S_2310_0.993**, A_2327_0.999**, L_2323_0.972*, H_2319_0.993**, T_2269_0.999**, S_2325_0.989*, A_2328_0.994**,
ENSGALG00000037443	ENSGALT00000071423	CRAT	0.001	General function prediction only	carnitine	D_569_0.993**, Y_582_0.993**, N_553_0.992**, G_552_0.992**, G_561_0.998**, L_570_0.991**, I_555_0.976*, V_571_0.976*, D_556_0.996**, T_580_0.998**, A_583_0.994**, H_558_0.995**, Q_565_0.999**, S_593_0.999**, N_589_0.983*, A_585_0.994**, R_551_0.979*, M_586_0.997**, H_587_0.999**, R_557_0.999**, A_554_0.998**,
ENSGALG00000031567	ENSGALT00000071429	GPALPP1	0.01	Function unknown	kiaa1704	--
ENSGALG00000006672	ENSGALT00000071641	LARP4B	0.001	General function prediction only	La ribonucleoprotein domain family, member 4B	S_590_0.998**, R_583_0.992**, N_563_0.991**, D_559_0.982*, R_587_0.989*, R_571_0.992**, A_578_0.978*, S_595_0.985*, P_592_0.980*, P_582_0.992**, S_588_0.999**, P_576_0.998**, T_584_0.956*, P_573_0.998**, V_558_0.992**, E_572_0.999**, L_581_0.999**, N_555_0.999**, T_580_0.998**, S_567_0.994**, E_596_0.992**, S_561_0.995**,
ENSGALG00000039222	ENSGALT00000071644	DPY19L4	0.001	Function unknown	C. elegans	N_281_0.978*, S_283_0.963*,
ENSGALG00000038948	ENSGALT00000071675	KDM5B	0.001	General function prediction only	lysine (K)-specific demethylase	S_1303_0.962*, C_1311_0.981*, P_1304_0.980*, S_1287_0.978*, H_1302_0.984*, P_1291_0.959*,
ENSGALG00000029678	ENSGALT00000071713	SNX16	0.001	Intracellular trafficking, secretion, and vesicular transport	sorting nexin 16	M_279_0.962*, M_283_0.980*, R_281_0.999**, S_275_0.999**, Q_282_0.977*,
ENSGALG00000032400	ENSGALT00000071719	UTP23	0.01	General function prediction only	small subunit (SSU) processome component, homolog	--
ENSGALG00000039855	ENSGALT00000071795		0.001	Function unknown	Sorting nexin 29	L_274_0.992**, Y_296_0.991**, G_278_0.983*, E_275_0.999**, H_280_0.993**, K_273_0.989*, S_292_0.999**, N_276_1.000**, R_291_0.999**, R_290_0.999**,
ENSGALG00000006867	ENSGALT00000071796	QRICH1	0.001	General function prediction only	glutamine-rich 1	T_427_0.994**, C_442_0.997**, L_438_0.982*, Q_429_0.981*, P_426_0.991**, Q_437_0.996**, Q_431_0.988*, P_428_0.991**, T_441_0.982*, Q_420_0.974*, Q_433_0.997**, Q_424_0.996**, Q_423_0.997**,
ENSGALG00000036097	ENSGALT00000072350	CDH18	0.001	Intracellular trafficking, secretion, and vesicular transport	Cadherins are calcium dependent cell adhesion proteins (By similarity)	G_75_0.968*,
ENSGALG00000007664	ENSGALT00000072981	PSMD1	0.001	Posttranslational modification, protein turnover, chaperones	26s proteasome	K_848_0.993**, E_852_0.963*, E_849_0.989*, E_853_0.978*, K_844_0.996**,
ENSGALG00000002447	ENSGALT00000073093	CTNNA1	0.001	Cytoskeleton	Catenin (Cadherin-associated protein), alpha	N_283_0.997**, N_282_1.000**, A_280_0.999**, Y_279_0.999**,
ENSGALG00000034649	ENSGALT00000073125	TOX3	0.001	Transcription	TOX high mobility group box family member	Y_32_0.990**, Y_29_0.990**, N_33_0.999**,
ENSGALG00000034383	ENSGALT00000073490	TRMT2B	0.001	Translation, ribosomal structure and biogenesis	tRNA methyltransferase 2 homolog	V_396_0.998**, A_394_0.998**, I_417_0.982*, P_380_0.995**, D_388_0.986*, N_397_0.999**, V_393_0.993**, N_434_0.997**, S_424_0.994**, L_420_0.999**, W_386_0.998**, H_404_0.995**, Y_422_0.996**, V_395_0.997**, P_391_0.999**, K_426_0.994**, E_430_0.999**, R_400_0.998**, C_440_0.998**, C_439_0.999**, L_392_0.992**, P_398_0.995**, L_382_0.983*, L_438_0.994**, R_419_0.999**, A_416_0.958*, R_433_0.993**…
ENSGALG00000033278	ENSGALT00000073576	NLRC3	0.001	General function prediction only	NLR family, CARD domain containing 3	L_813_0.989*, L_755_0.972*, S_817_0.980*, A_741_0.978*, Q_750_0.991**, D_744_0.953*, K_748_0.989*,
ENSGALG00000015418	ENSGALT00000074036	EPHA6	0.001	Signal transduction mechanisms	Serine Threonine protein kinase	I_246_0.966*, K_238_0.992**, I_265_0.994**, S_245_0.999**, W_250_0.991**, I_390_0.968*, E_269_0.999**, H_257_0.999**, S_231_0.988*, V_236_0.998**, P_388_0.993**, I_260_0.996**, S_242_0.995**, W_240_0.991**, S_249_0.997**, I_233_0.974*, A_241_0.994**, Y_268_0.993**, P_230_0.994**,
ENSGALG00000039830	ENSGALT00000074101	DHX30	0.001	Replication, recombination and repair	helicase	P_192_0.959*, E_236_0.987*, E_244_0.987*, E_241_0.982*,
ENSGALG00000037136	ENSGALT00000074158	RPS6KA	0.001	Signal transduction mechanisms	Ribosomal protein S6 kinase	N_709_0.991**, K_712_0.994**, Y_705_0.999**, M_701_0.999**, S_711_0.996**, S_706_0.994**, A_703_0.999**, A_700_0.994**,
ENSGALG00000006426	ENSGALT00000074426	PAK2	0.001	Signal transduction mechanisms	Serine threonine protein kinase that plays a role in a variety of different signaling pathways including cytoskeleton regulation, cell motility, cell cycle progression, apoptosis or proliferation. Acts as downstream effector of the small GTPases CDC42 and RAC1. Activation by the binding of active CDC42 and RAC1 results in a conformational change and a subsequent autophosphorylation on several ser…	K_285_1.000**, E_287_0.999**, K_300_0.998**, I_293_0.956*, N_306_1.000**, I_278_0.995**, Q_277_1.000**, E_292_0.999**, L_280_0.999**, V_305_1.000**, K_286_0.999**, I_275_0.991**, L_308_0.999**, Q_283_0.998**, K_297_1.000**, D_309_1.000**, N_291_0.999**, N_279_0.999**, I_290_0.994**, L_288_0.991**, K_276_1.000**, V_295_0.993**, I_304_0.952*, M_296_1.000**, Q_281_1.000**,
ENSGALG00000042452	ENSGALT00000074535	DPP4	0.001	Amino acid transport and metabolism	peptidase s9 prolyl oligopeptidase active site domain protein	R_351_0.954*, T_345_0.981*, S_344_0.994**,
ENSGALG00000028567	ENSGALT00000074687	MYL9	0.001	Cytoskeleton	myosin light chain	G_79_0.960*, M_73_1.000**, Y_69_0.998**, I_81_0.996**, E_71_1.000**, N_82_0.998**, S_75_0.996**, M_74_0.999**,
ENSGALG00000015254	ENSGALT00000075015	ST18	0.001	General function prediction only	suppression of tumorigenicity 18 (breast carcinoma) (zinc finger protein)	C_889_0.974*, S_887_0.968*, G_869_0.986*, S_873_0.995**, G_872_0.963*, L_886_0.955*, C_865_0.967*,
ENSGALG00000031440	ENSGALT00000075185	PTPRU	0.001	Signal transduction mechanisms	protein tyrosine phosphatase	Q_77_0.992**, V_73_0.982*, Y_70_0.997**, H_85_0.990*, Q_82_0.991**, L_71_0.981*,
ENSGALG00000040320	ENSGALT00000075818	HOXB8	0.001	Transcription	homeobox	K_241_0.979*, K_237_0.996**, Q_236_0.989*,
ENSGALG00000002283	ENSGALT00000076327	MAPKAPK3	0.001	Signal transduction mechanisms	mitogen-activated protein kinase-activated protein kinase	K_66_0.999**, F_64_0.998**, L_61_0.967*, V_60_0.998**, C_72_0.993**, C_63_0.999**,
ENSGALG00000002162	ENSGALT00000076439	ACO1	0.001	Energy production and conversion	aconitate hydratase	K_671_0.998**, A_710_0.954*, V_558_0.968*, I_670_0.952*, G_557_0.999**, P_571_0.999**, G_855_0.999**, A_555_1.000**, V_646_0.967*, S_560_0.999**, Q_844_0.951*, R_832_0.999**, V_819_0.998**, E_566_0.992**, V_556_1.000**, I_865_0.973*, L_559_0.998**, N_697_0.962*, I_864_0.998**, L_846_0.998**, Y_827_0.998**, G_551_0.999**, D_654_0.954*, H_831_1.000**, L_683_0.998**, H_570_0.994**, R_563_1.000**, R_…
ENSGALG00000006013	ENSGALT00000076756	ZNF512B	0.001	General function prediction only	Zinc finger protein	G_592_0.996**, N_606_0.992**, N_597_0.995**, P_591_0.959*, R_516_0.985*, T_589_0.988*, G_520_0.997**, K_595_0.988*, N_618_0.982*, E_607_0.998**, G_518_0.998**, N_587_0.991**, L_596_0.977*, L_601_0.990*, N_615_0.991**, G_612_0.995**, Y_588_0.998**, K_609_0.997**, R_599_0.952*, E_610_0.998**, K_605_0.996**, R_511_0.964*, L_593_0.989*, K_611_0.960*,
ENSGALG00000003908	ENSGALT00000076837	SLC6A5	0.001	Inorganic ion transport and metabolism	Transporter	S_247_0.951*,
ENSGALG00000038145	ENSGALT00000076895	DPP7	0.001	Posttranslational modification, protein turnover, chaperones	dipeptidylpeptidase 7	I_412_0.995**, A_422_0.984*, S_409_0.991**, G_424_0.989*, W_421_0.952*, S_407_0.990**, N_410_0.986*, D_419_0.992**, G_425_0.982*, N_415_0.978*, I_411_0.999**, S_414_0.989*,
ENSGALG00000043307	ENSGALT00000076920	HIBCH	0.001	Lipid transport and metabolism	Enoyl-CoA hydratase	F_113_0.958*, E_116_0.990*,
ENSGALG00000032305	ENSGALT00000077131	DHX8	0.001	Replication, recombination and repair	helicase	G_251_0.998**, R_210_0.965*, V_254_0.997**, K_90_0.996**, R_199_0.978*, H_225_0.999**, P_86_0.950*, G_242_0.993**, R_207_0.998**, M_80_0.995**, K_243_0.969*, K_212_0.995**, K_191_0.999**, S_246_0.990*, R_201_0.973*, L_259_0.996**, P_82_0.998**, S_196_0.995**, W_221_0.993**, D_223_0.999**, R_193_0.954*, G_190_0.994**, F_250_0.992**, I_247_0.967*, S_89_0.990*, S_198_0.999**, Q_249_0.991**, Y_194_0.…
ENSGALG00000013657	ENSGALT00000077521	ZNF236	0.001	General function prediction only	Zinc finger protein	--
ENSGALG00000030511	ENSGALT00000077581	SLC19A1	0.001	Inorganic ion transport and metabolism	solute carrier family 19 (folate transporter), member 1	L_366_0.965*, G_354_0.979*,
ENSGALG00000037675	ENSGALT00000077854	COL14A1	0.001	Intracellular trafficking, secretion, and vesicular transport	collagen, type XIV, alpha 1	S_1734_0.995**, G_1761_0.997**, S_1744_0.999**, P_1757_0.991**, G_1749_0.995**, R_1735_0.993**, S_1738_0.995**, E_1733_0.995**, P_1731_0.999**, T_1754_0.997**, P_1730_0.999**, S_1759_0.992**, P_1745_0.977*, P_1742_0.996**,
ENSGALG00000016267	ENSGALT00000078001	PHF3	0.001	Transcription	PHD finger protein 3	P_1276_0.983*, S_1275_0.974*, E_1284_0.979*, K_1287_0.992**, K_1285_0.981*, S_1289_0.954*, A_1288_0.952*,
ENSGALG00000003359	ENSGALT00000078413	RAB5C	0.001	General function prediction only	member RAS oncogene family	G_55_0.980*,
ENSGALG00000013720	ENSGALT00000078677	FBXO15	0.001	Function unknown	F-box protein 15	--
ENSGALG00000029980	ENSGALT00000079152	QARS	0.001	Translation, ribosomal structure and biogenesis	Catalyzes the attachment of glutamate to tRNA(Glu) in a two-step reaction glutamate is first activated by ATP to form Glu-AMP and then transferred to the acceptor end of tRNA(Glu) (By similarity)	M_610_0.970*, N_299_0.987*, T_609_0.973*, K_292_0.995**, L_282_0.952*, E_303_0.998**, T_302_0.974*, M_312_0.976*, Y_300_0.975*, T_311_0.998**, A_685_0.971*, K_316_0.996**, L_286_0.985*, V_307_0.993**, A_290_0.974*, K_280_0.969*, G_276_0.996**, G_324_0.987*, S_281_0.999**, K_301_0.987*, Q_285_0.981*, Y_305_0.991**, T_308_0.982*,
ENSGALG00000028629	ENSGALT00000079606	TM4SF1a	0.01	Intracellular trafficking, secretion, and vesicular transport	transmembrane 4 L six family member	K_190_0.968*,
ENSGALG00000034610	ENSGALT00000079624	ARFGEF1	0.001	General function prediction only	and SEC7 domain	A_196_0.993**, N_203_0.992**, N_190_0.993**, Q_173_0.990*, A_194_0.992**, Q_162_0.957*, T_193_0.999**, Y_179_0.997**, Q_191_0.998**, A_158_0.998**, R_208_0.989*, L_188_0.983*, I_164_0.999**, A_213_0.991**, T_197_0.987*, H_167_0.991**, L_155_0.952*, T_192_0.993**, F_206_0.990**, E_165_0.999**, E_168_0.994**, A_207_0.991**, H_163_0.986*, I_181_0.995**, A_174_0.998**, T_157_0.952*, Q_212_0.983*, S_1…
ENSGALG00000041687	ENSGALT00000079882	SREBF2	0.001	Transcription	sterol regulatory element binding transcription factor	A_967_0.997**, Q_961_0.999**, K_960_0.953*, A_946_0.994**, T_955_0.997**, S_963_0.968*, L_968_0.994**, A_974_0.995**, D_948_0.997**, Y_972_0.999**, V_941_0.995**, L_953_0.996**, S_965_0.999**, A_962_0.998**, L_950_0.976*,
ENSGALG00000036836	ENSGALT00000080778	SOSTDC1	0.001	Posttranslational modification, protein turnover, chaperones	Sclerostin domain containing 1	H_35_0.998**, Y_33_0.994**, L_32_0.996**, T_63_0.979*, N_68_0.983*, A_42_0.997**, S_46_0.999**, S_65_0.998**, N_55_0.999**, V_36_0.996**, N_51_0.997**, H_59_0.996**, Y_60_0.999**, S_34_0.998**, T_49_0.997**, S_45_0.999**, D_66_0.997**, S_43_0.993**, R_54_0.971*,
ENSGALG00000038943	ENSGALT00000080978	RASSF5	0.001	General function prediction only	Ras association (RalGDS AF-6) domain family member 5	L_167_0.975*, K_170_0.996**,
ENSGALG00000033789	ENSGALT00000081140	HSP90B1	0.001	Posttranslational modification, protein turnover, chaperones	Molecular chaperone. Has ATPase activity (By similarity)	K_298_0.997**, E_303_0.997**, A_310_0.980*, E_315_0.977*, E_294_0.956*, E_293_0.990**, E_290_0.974*, E_289_0.976*, P_320_0.994**, E_302_0.993**, K_318_0.999**, E_299_0.999**, E_314_0.997**, E_286_0.997**, D_307_0.973*, T_285_0.979*, T_304_0.996**, K_324_0.991**, D_306_0.995**, K_321_0.989*, A_297_0.993**, E_313_0.962*,
ENSGALG00000043167	ENSGALT00000081930	TNFRSF11B	0.01	Signal transduction mechanisms	Tumor necrosis factor receptor superfamily, member 11b	--
ENSGALG00000007191	ENSGALT00000082171	TK1	0.01	Nucleotide transport and metabolism	THymidine Kinase	I_221_0.983*,
ENSGALG00000012454	ENSGALT00000082209	CYTH4	0.001	General function prediction only	and SEC7 domain	D_295_0.952*, D_324_0.951*, E_316_0.998**, W_290_0.999**, K_287_1.000**, W_286_0.998**, L_310_0.990**, R_321_0.985*, S_319_0.999**, N_296_1.000**, L_315_0.975*, K_327_0.998**, I_312_0.998**, K_328_0.993**, E_308_1.000**, D_306_0.995**, D_325_0.999**, R_289_0.997**, K_307_0.980*, V_283_0.970*, K_322_0.982*, T_294_0.998**, P_314_0.996**,
ENSGALG00000034806	ENSGALT00000082248		0.001	Amino acid transport and metabolism	amino acid	V_199_0.961*, G_181_0.997**, V_184_0.980*, M_194_0.969*, L_170_0.987*, L_196_0.954*, T_171_0.985*, G_203_0.997**, A_191_0.999**, S_169_1.000**, F_172_1.000**, D_186_0.997**, C_175_1.000**, Q_185_1.000**, N_174_0.998**, T_189_0.997**, Y_205_0.997**, T_182_1.000**, K_192_0.999**, S_201_0.962*, I_173_0.998**, K_206_1.000**, L_204_0.954*,
ENSGALG00000040089	ENSGALT00000082756	HPS3	0.001	Function unknown	Hermansky-Pudlak syndrome 3	G_267_0.997**, K_240_0.990**, E_252_0.986*, T_278_0.978*, P_262_0.983*, E_255_0.999**, P_276_0.968*, C_259_0.983*, E_283_0.998**, V_294_0.991**, R_300_0.984*, I_258_0.971*, L_279_0.981*, T_282_0.989*, L_253_0.953*, F_299_0.972*, D_241_0.991**, C_273_0.985*, Q_260_0.997**, D_288_0.998**, E_269_0.998**, L_298_0.978*, S_270_0.986*, I_275_0.990**, L_272_0.986*, F_292_0.988*,
ENSGALG00000000550	ENSGALT00000082774	STRADA	0.001	Signal transduction mechanisms	ste20-related kinase adaptor	F_394_0.993**, D_391_0.988*, D_390_0.980*, V_389_0.988*,
ENSGALG00000039595	ENSGALT00000082819	BTBD11	0.01	General function prediction only	BTB (POZ) domain containing	--
ENSGALG00000016735	ENSGALT00000083019	TUBGCP5	0.001	Cytoskeleton	Tubulin, gamma complex associated protein 5	L_447_0.991**, V_444_0.997**,
