# Supplementary material for: Genome Sequence of Peacock Reveals the Peculiar Case of a Glittering Bird
Source: Front Genet. 2018 Sep 19;9:392. doi: 10.3389/fgene.2018.00392 (PMC6156156; doi:10.3389/fgene.2018.00392)
Supplement: Supplementary file 5 [file Table_4.XLSX]

## Sheet: uniq_sub_3239
Reference Gene ID	Reference Transcript ID	Gene Symbol	eggNOG Category	eggNOG Function	Unique Substituion Sites	SIFT
ENSGALG00000000011	ENSGALT00000000012	C10orf88	Function unknown	Chromosome 10 open reading frame 88	L127S, N148K, V186A, M195I, Q203H, G235S, I313V,	--
ENSGALG00000000038	ENSGALT00000000051		Posttranslational modification, protein turnover, chaperones	TrySPc	F63Y, D210N, L266V,	--
ENSGALG00000000081	ENSGALT00000000109	IL4I1	Amino acid transport and metabolism	AMine oXidase	R143Q, S335A,	--
ENSGALG00000000091	ENSGALT00000000128	INTS4	Intracellular trafficking, secretion, and vesicular transport	integrator complex subunit 4	I364V, L590V, S768A, N946T,	--
ENSGALG00000000120	ENSGALT00000000169	BMP10	Posttranslational modification, protein turnover, chaperones	Bone morphogenetic protein 10	A186V, A346T,	--
ENSGALG00000000146	ENSGALT00000000200	SUPT6H	Transcription	Transcription elongation factor	T257A,	--
ENSGALG00000000154	ENSGALT00000000210		Signal transduction mechanisms	DENN MADD domain containing	S241A, V245A,	--
ENSGALG00000000168	ENSGALT00000000224	ADORA1	Intracellular trafficking, secretion, and vesicular transport	adenosine A1 receptor	M36V, N70S, P73L, T322A,	--
ENSGALG00000000201	ENSGALT00000000267	PLEKHM1	Signal transduction mechanisms	pleckstrin homology domain containing, family M	P81L, E145D, L203P, V375L, E409D, E440D, S447L, S533A, T644A,	--
ENSGALG00000000253	ENSGALT00000000332	SLC25A46	General function prediction only	Solute carrier family 25 member	L275I,	--
ENSGALG00000000259	ENSGALT00000000339	PSMF1	Posttranslational modification, protein turnover, chaperones	proteasome (prosome, macropain) inhibitor subunit 1	S71T, I139V,	--
ENSGALG00000000371	ENSGALT00000000503	CRHR1	Intracellular trafficking, secretion, and vesicular transport	Corticotropin releasing hormone receptor	P3A,	--
ENSGALG00000000379	ENSGALT00000000519	ITGB3	Extracellular structures	integrin, beta	T81M, D296N, F298V,	--
ENSGALG00000000397	ENSGALT00000000542	IPO9	Posttranslational modification, protein turnover, chaperones	Importin	T939A, D957E,	--
ENSGALG00000000407	ENSGALT00000000555		Function unknown	Kelch-like protein	D101E, V150M, G400A,	V150M,
ENSGALG00000000409	ENSGALT00000000557	CHMP7	Intracellular trafficking, secretion, and vesicular transport	Charged multivesicular body protein 7	D266A,	--
ENSGALG00000000437	ENSGALT00000000594		Posttranslational modification, protein turnover, chaperones	although bonds involving phenylalanine and leucine are preferred, many others are also cleaved to some extent	V63A,	--
ENSGALG00000000438	ENSGALT00000000595	ERMP1	General function prediction only	peptidase m28	I534V, T636A, Y862C,	--
ENSGALG00000000441	ENSGALT00000000598	KCNA10	Inorganic ion transport and metabolism	potassium voltage-gated channel shaker-related subfamily member	T255I,	--
ENSGALG00000000451	ENSGALT00000000612	MEIG1	General function prediction only	meiosis expressed gene 1	D48A, K58N,	--
ENSGALG00000000469	ENSGALT00000000639	ADRA1A	Intracellular trafficking, secretion, and vesicular transport	receptor	G441R,	--
ENSGALG00000000513	ENSGALT00000000702	ZNF276	General function prediction only	Zinc finger protein 276	E287D, I511V,	--
ENSGALG00000000535	ENSGALT00000000739	ERRFI1	Posttranslational modification, protein turnover, chaperones	ERBB receptor feedback inhibitor 1	H78R, I141V, P446A,	--
ENSGALG00000000538	ENSGALT00000000743	RNF113A	General function prediction only	Ring finger protein	M302V,	--
ENSGALG00000000564	ENSGALT00000000783	CCDC47	Function unknown	Coiled-coil domain containing 47	I316V,	--
ENSGALG00000000577	ENSGALT00000000806	RANBP3	Intracellular trafficking, secretion, and vesicular transport	RAN binding protein 3	S470A,	--
ENSGALG00000000581	ENSGALT00000000811	DDX42	Replication, recombination and repair	ATP-dependent RNA helicase	Q787P,	--
ENSGALG00000000596	ENSGALT00000000832	CDC27	General function prediction only	repeat-containing protein	N190S, I193V,	--
ENSGALG00000000599	ENSGALT00000000837	2002-03-01	RNA processing and modification	membrane-associated ring finger (C3HC4) 2, E3 ubiquitin protein ligase	S19G, N72S,	--
ENSGALG00000000627	ENSGALT00000000891	DNAJC11	Posttranslational modification, protein turnover, chaperones	ATP binding to DnaK triggers the release of the substrate protein, thus completing the reaction cycle. Several rounds of ATP-dependent interactions between DnaJ, DnaK and GrpE are required for fully efficient folding. Also involved, together with DnaK and GrpE, in the DNA replication of plasmids through activation of initiation proteins (By similarity)	S26T, H163Q, I431V,	--
ENSGALG00000000653	ENSGALT00000000928	CNTN2	Posttranslational modification, protein turnover, chaperones	Contactin	L820Q,	--
ENSGALG00000000672	ENSGALT00000000949	SCMH1	Transcription	sex comb on	M291V,	--
ENSGALG00000000674	ENSGALT00000000956	MYO1D	Cytoskeleton	Myosin ID	M535L, A775V,	--
ENSGALG00000000678	ENSGALT00000000960	CITED4	Transcription	Cbp p300-interacting transactivator with Glu Asp-rich carboxy-terminal domain	P146S,	--
ENSGALG00000000690	ENSGALT00000000973	GDPD4	Energy production and conversion	glycerophosphoryl diester phosphodiesterase	T52I,	--
ENSGALG00000000724	ENSGALT00000001027	PM20D1	Amino acid transport and metabolism	Catalyzes the hydrolysis of N-succinyl-L,L- diaminopimelic acid (SDAP), forming succinate and LL-2,6- diaminoheptanedioate (DAP), an intermediate involved in the bacterial biosynthesis of lysine and meso-diaminopimelic acid, an essential component of bacterial cell walls (By similarity)	I112V, Y196F, S226A, K276R, T419A, I445V,	--
ENSGALG00000000736	ENSGALT00000001052	MATK	Signal transduction mechanisms	tyrosine kinase	E134D, I223V,	--
ENSGALG00000000745	ENSGALT00000001070	SLC26A9	Inorganic ion transport and metabolism	sulfate transporter	L699V, S800T,	--
ENSGALG00000000761	ENSGALT00000001106	TSKU	General function prediction only	tsukushi small leucine rich proteoglycan homolog (Xenopus laevis)	A154V,	--
ENSGALG00000000776	ENSGALT00000001123		Chromatin structure and dynamics ,Transcription ,	bromodomain	F86Y, H106N, E410D,	--
ENSGALG00000000777	ENSGALT00000001127	EYA3	General function prediction only	eyes absent homolog 3 (Drosophila)	V404G,	--
ENSGALG00000000790	ENSGALT00000001147	DNAJC8	Posttranslational modification, protein turnover, chaperones	DnaJ (Hsp40) homolog, subfamily C, member 8	E98V,	--
ENSGALG00000000811	ENSGALT00000001181	IST1	Cytoskeleton	increased sodium tolerance 1 homolog (yeast)	E307D,	--
ENSGALG00000000817	ENSGALT00000001191	ZNF821	General function prediction only	zinc finger protein 821	V108I, N361S,	--
ENSGALG00000000818	ENSGALT00000001192	LRRC32	Function unknown	leucine rich repeat containing 32	A155S, M173T, I521V, Q565E,	--
ENSGALG00000000848	ENSGALT00000001245	AP1G1	Intracellular trafficking, secretion, and vesicular transport	AP1 complex subunit	N626S, N707S,	--
ENSGALG00000000856	ENSGALT00000001255	EIF2D	Translation, ribosomal structure and biogenesis	translation Initiation Factor	Y179H, S514A,	--
ENSGALG00000000857	ENSGALT00000001256	NMT1	Lipid transport and metabolism	Adds a myristoyl group to the N-terminal glycine residue of certain cellular proteins (By similarity)	R260Q, S281G,	--
ENSGALG00000000875	ENSGALT00000001289	PHLPP2	Signal transduction mechanisms	Phosphatase	A304G, A370S, I467V, K470N, S1264C,	--
ENSGALG00000000893	ENSGALT00000001314	TAT	Amino acid transport and metabolism	aminotransferase	M380I,	--
ENSGALG00000000894	ENSGALT00000001315	APCDD1	General function prediction only	Adenomatosis polyposis coli down-regulated	N156S, P471H,	P471H,
ENSGALG00000000895	ENSGALT00000001317	NUDC	General function prediction only	nuclear movement protein	K170R,	--
ENSGALG00000000901	ENSGALT00000001323	CHST4	Function unknown	Carbohydrate (Keratan sulfate Gal-6) sulfotransferase 1	V225I, A258P, P260A, Q314K, D370N,	--
ENSGALG00000000902	ENSGALT00000001324	KDF1	Function unknown	chromosome 1 open reading frame 172	N157S, S379F,	--
ENSGALG00000000908	ENSGALT00000001336	ADAT1	RNA processing and modification	Adenosine deaminase, tRNA-specific 1	G168A, S396G,	--
ENSGALG00000000927	ENSGALT00000001362	ANGPTL2	Function unknown	Angiopoietin-like 2	M205T, T251P, S370T,	--
ENSGALG00000000962	ENSGALT00000001417	PUS3	Translation, ribosomal structure and biogenesis	Formation of pseudouridine at positions 38, 39 and 40 in the anticodon stem and loop of transfer RNAs (By similarity)	K49R, I72V, A379T,	--
ENSGALG00000000977	ENSGALT00000001443	MAPKAP1	Signal transduction mechanisms	mitogen-activated protein kinase associated protein 1	I283M,	--
ENSGALG00000000988	ENSGALT00000001458	EFTUD2	Translation, ribosomal structure and biogenesis	elongation factor Tu GTP binding domain containing 2	L783V,	--
ENSGALG00000001003	ENSGALT00000001481	SEPN1	Posttranslational modification, protein turnover, chaperones	selenoprotein N, 1	A419T,	--
ENSGALG00000001006	ENSGALT00000001487	TP73	Transcription	induces growth arrest or apoptosis depending on the physiological circumstances and cell type. Involved in cell cycle regulation as a trans-activator that acts to negatively regulate cell division by controlling a set of genes required for this process. One of the activated genes is an inhibitor of cyclin-dependent kinases. Apoptosis induction seems to be mediated either by stimulation of BAX and…	S474N,	--
ENSGALG00000001055	ENSGALT00000001581	NSF	Posttranslational modification, protein turnover, chaperones	Aaa atpase	N106S,	--
ENSGALG00000001058	ENSGALT00000001585	ARHGEF16	Signal transduction mechanisms	Rho guanine nucleotide exchange factor (GEF)	D70N, A113T, G120V, E171G, I264V,	--
ENSGALG00000001062	ENSGALT00000001589	GGT7	Amino acid transport and metabolism	Gamma-glutamyltranspeptidase (EC 2.3.2.2)	V194I, H241Y, D428G, V487I, M523T,	V487I,
ENSGALG00000001067	ENSGALT00000001597	TMEM57	Function unknown	Transmembrane protein 57	I228M,	--
ENSGALG00000001122	ENSGALT00000001691	CALN1	Signal transduction mechanisms	calneuron 1	M81I,	--
ENSGALG00000001126	ENSGALT00000001695	CHAF1A	Chromatin structure and dynamics	Chromatin assembly factor 1, subunit A (P150)	K279R,	--
ENSGALG00000015708	ENSGALT00000001712	FGFR3	Signal transduction mechanisms	Fibroblast growth factor receptor	T768I,	--
ENSGALG00000001146	ENSGALT00000001723	UBXN6	Posttranslational modification, protein turnover, chaperones	UBX domain protein 6	K93R, A111S, V129I, L336I,	--
ENSGALG00000001172	ENSGALT00000001776	KBP	Amino acid transport and metabolism ,Inorganic ion transport and metabolism ,Signal transduction mechanisms ,	Glutamate	N104S, Q156H, H316R,	--
ENSGALG00000001174	ENSGALT00000001779	WBSCR16	Cell cycle control, cell division, chromosome partitioning ,Cytoskeleton ,	regulator of chromosome condensation	K239E,	--
ENSGALG00000001184	ENSGALT00000001797	COQ9	Function unknown	ubiquinone biosynthesis protein Coq9	P69L, D235E,	--
ENSGALG00000001203	ENSGALT00000001822		Function unknown	transmembrane protein 45B	V127L,	--
ENSGALG00000001204	ENSGALT00000001823	ENKD1	General function prediction only	enkurin domain containing 1	K199T, A206P, R289Q,	--
ENSGALG00000001214	ENSGALT00000001842	PARD6A	Signal transduction mechanisms	par-6 (partitioning defective 6) homolog	A100T,	--
ENSGALG00000001220	ENSGALT00000001852	HERPUD1	Posttranslational modification, protein turnover, chaperones	Homocysteine-inducible, endoplasmic reticulum stress-inducible, ubiquitin-like domain member 1	M127R, T133S, R252L,	R252L, M127R,
ENSGALG00000001225	ENSGALT00000001858	RABGAP1	General function prediction only	RAB GTPase activating protein	A280T,	--
ENSGALG00000001234	ENSGALT00000001871	CETP	Defense mechanisms	cholesteryl ester transfer protein, plasma	A59V, N152S, Q218R, V270T, V373A,	--
ENSGALG00000001306	ENSGALT00000001988	NFRKB	General function prediction only	Nuclear factor related to kappaB binding protein	K173R, T207A, T1087S,	--
ENSGALG00000001310	ENSGALT00000001994	TRNAU1AP	General function prediction only	Rna-binding protein	T73A,	--
ENSGALG00000001332	ENSGALT00000002032	RBL1	Transcription	Retinoblastoma-like	I659V, V759L, D1027A, A1037P,	--
ENSGALG00000001348	ENSGALT00000002058	TEKT3	Cytoskeleton	tektin 5	E2D, G74E, P77S,	--
ENSGALG00000001467	ENSGALT00000002223	ANKFY1	General function prediction only	Ankyrin Repeat	N45S,	--
ENSGALG00000001473	ENSGALT00000002235	MIB2	General function prediction only	Ankyrin Repeat	T418N,	--
ENSGALG00000006785	ENSGALT00000002244	IRF1	Transcription	interferon regulatory factor 1	A206P, Q242H, P305S,	--
ENSGALG00000001489	ENSGALT00000002258	SSU72	Transcription	RNA polymerase II subunit A C-terminal domain phosphatase	V104I,	--
ENSGALG00000001490	ENSGALT00000002259	KCNJ13	Intracellular trafficking, secretion, and vesicular transport	potassium inwardly-rectifying channel, subfamily J, member 13	A327G, D330E,	--
ENSGALG00000001503	ENSGALT00000002283	TBCD	Posttranslational modification, protein turnover, chaperones	tubulin folding cofactor D	V546A, I575V, T647M, L665V, I745V, F788S, I943V, K1130T, D1148E,	--
ENSGALG00000001518	ENSGALT00000002308	ZNF750	Transcription	zinc finger protein 750	A111T, I133L,	--
ENSGALG00000001531	ENSGALT00000002328	FN3K	General function prediction only	fructosamine 3 kinase	G19S, N98S, A149T, Q162H,	--
ENSGALG00000001538	ENSGALT00000002337	ST7L	General function prediction only	Suppression of tumorigenicity 7	D229E, M261L, K265R, F517C,	--
ENSGALG00000001558	ENSGALT00000002368	MOV10	Replication, recombination and repair	Helicase	I56V, K76N, T156S, D539G, I563V, E864Q, T877A,	--
ENSGALG00000001565	ENSGALT00000002379	C5	General function prediction only	Complement component	S318L, D573E, R1413G, E1551Q, Q1555R,	--
ENSGALG00000001569	ENSGALT00000002385	RHOC	General function prediction only	ras homolog family member	I86V,	--
ENSGALG00000001596	ENSGALT00000002422	MLLT1	Transcription	myeloid lymphoid or mixed-lineage leukemia (trithorax homolog, Drosophila)	I344L, A465V,	--
ENSGALG00000001603	ENSGALT00000002433	NARF	Energy production and conversion	hydrogenase	E63D, N81S, R149K, N267S,	--
ENSGALG00000001605	ENSGALT00000002440	PPM1J	Signal transduction mechanisms	protein phosphatase, Mg2 Mn2 dependent	V389F,	--
ENSGALG00000001606	ENSGALT00000002444	INPP5B	Signal transduction mechanisms	inositol	D632N, L690V, K742R,	--
ENSGALG00000001607	ENSGALT00000002445	C17orf62	Function unknown	chromosome 17 open reading frame 62	L45V,	--
ENSGALG00000001615	ENSGALT00000002461	MAN2C1	Carbohydrate transport and metabolism	Mannosidase alpha class 2C member 1	A235V, S542C,	--
ENSGALG00000001618	ENSGALT00000002469	OGFOD3	Function unknown	2-oxoglutarate and iron-dependent oxygenase domain containing 3	R99S,	--
ENSGALG00000001619	ENSGALT00000002475	ATG16L1	General function prediction only	Autophagy related 16-like	S593R,	--
ENSGALG00000001637	ENSGALT00000002500	PSMD5	Posttranslational modification, protein turnover, chaperones	proteasome (prosome, macropain) 26S subunit, non-ATPase, 5	M297V,	--
ENSGALG00000001642	ENSGALT00000002508	GLT8D1	Carbohydrate transport and metabolism	glycosyltransferase 8 domain containing	E61D,	--
ENSGALG00000001661	ENSGALT00000002535	SLC22A7	Carbohydrate transport and metabolism	solute carrier family 22 (organic anion transporter), member	L37M, T149M, P307L, S461A,	--
ENSGALG00000001662	ENSGALT00000002539	ATP10B	Inorganic ion transport and metabolism	P-type atpase	P615S, I616L, L635I, I1266V,	--
ENSGALG00000001702	ENSGALT00000002614	EXOC3L1	Intracellular trafficking, secretion, and vesicular transport	Exocyst complex component 3-like	H521N, Y729F,	--
ENSGALG00000001708	ENSGALT00000002623	MED1	Transcription	Mediator complex subunit 1	V72G, P655A, T959A,	V72G,
ENSGALG00000001711	ENSGALT00000002626	PPCDC	Cell cycle control, cell division, chromosome partitioning ,Inorganic ion transport and metabolism ,	Phosphopantothenoylcysteine decarboxylase	Q155K,	--
ENSGALG00000001717	ENSGALT00000002634	SLC16A1	Lipid transport and metabolism	solute carrier family 16, member 1 (monocarboxylic acid transporter 1)	A71G, G226A,	--
ENSGALG00000001726	ENSGALT00000002649	NUDCD2	Signal transduction mechanisms	NudC domain containing 2	S154G,	--
ENSGALG00000001727	ENSGALT00000002650	LZTS1	General function prediction only	tumor suppressor 1	A381V,	--
ENSGALG00000001733	ENSGALT00000002661	LRIG2	Function unknown	Leucine-rich repeats and immunoglobulin-like domains	T110A, I124V, Q924P, N951A, E980G, G1017A, R1023Q,	--
ENSGALG00000003928	ENSGALT00000002663	LHX3	Transcription	Lim homeobox	P353S,	--
ENSGALG00000001765	ENSGALT00000002709	CAAP1	Signal transduction mechanisms	caspase activity and apoptosis inhibitor 1	K138R,	--
ENSGALG00000001777	ENSGALT00000002733	MFSD11	Carbohydrate transport and metabolism	Ion channel regulatory protein UNC-93	T205A,	--
ENSGALG00000001791	ENSGALT00000002760		General function prediction only	Short-chain dehydrogenase reductase Sdr	V62M, R115Q,	--
ENSGALG00000001797	ENSGALT00000002770	GPSM1	General function prediction only	G-protein signaling modulator	S467L,	--
ENSGALG00000001798	ENSGALT00000002774	BBS4	General function prediction only	repeat-containing protein	I354V,	--
ENSGALG00000001816	ENSGALT00000002807	MAGI3	Posttranslational modification, protein turnover, chaperones	e3 ubiquitin protein ligase	K897R,	--
ENSGALG00000001826	ENSGALT00000002822	WWC1	Posttranslational modification, protein turnover, chaperones	e3 ubiquitin protein ligase	N399S, A612T,	--
ENSGALG00000001845	ENSGALT00000002857	PHTF1	Transcription	homeodomain transcription factor 1	L198F, N312S, C348S, N437S,	--
ENSGALG00000001862	ENSGALT00000002882	ST6GALNAC1	Carbohydrate transport and metabolism	ST6 (alpha-N-acetyl-neuraminyl-2,3-beta-galactosyl-1,3)-N-acetylgalactosaminide alpha-2,6-sialyltransferase 1	Q60P, K196T, D270G, K282R, H402R,	--
ENSGALG00000001864	ENSGALT00000002894	C9orf72	Function unknown	Chromosome 9 open reading frame 72	T162M,	--
ENSGALG00000001916	ENSGALT00000002967	SLIT3	Signal transduction mechanisms	slit homolog	K743R,	--
ENSGALG00000001925	ENSGALT00000002979	GNB1L	General function prediction only	Guanine nucleotide binding protein (G protein), beta polypeptide 1-like	F105Y, K195E, N234D,	--
ENSGALG00000001934	ENSGALT00000002989	OPN4	Function unknown	Visual pigments are the light-absorbing molecules that mediate vision. They consist of an apoprotein, opsin, covalently linked to	K243R, Q244R, V261I, A395P, K418R, P515L,	--
ENSGALG00000001939	ENSGALT00000003002	HIPK1	Signal transduction mechanisms	Homeodomain interacting protein kinase	G784S,	--
ENSGALG00000001942	ENSGALT00000003005	SPDL1	Cytoskeleton	spindle apparatus coiled-coil protein 1	K51N, K437R, Q497R, S546G, N551S, T581A,	--
ENSGALG00000001944	ENSGALT00000003009	TBC1D2	Intracellular trafficking, secretion, and vesicular transport	TBC1 domain family member	K117R,	K117R,
ENSGALG00000001950	ENSGALT00000003018	PMPCA	Posttranslational modification, protein turnover, chaperones	peptidase'	H480R, T496A, S505C,	--
ENSGALG00000001965	ENSGALT00000003047	AARS	Translation, ribosomal structure and biogenesis	Catalyzes the attachment of alanine to tRNA(Ala) in a two-step reaction alanine is first activated by ATP to form Ala- AMP and then transferred to the acceptor end of tRNA(Ala). Also edits incorrectly charged Ser-tRNA(Ala) and Gly-tRNA(Ala) via its editing domain (By similarity)	K65R, R531Q, T796A,	--
ENSGALG00000001973	ENSGALT00000003067	GNL2	General function prediction only	Required for a late step of 50S ribosomal subunit assembly. Has GTPase activity (By similarity)	N232S, G534A, A647G, K652R, K782N,	--
ENSGALG00000001975	ENSGALT00000003069	TMEM120A	Function unknown	Transmembrane protein 120B	R52Q,	--
ENSGALG00000001983	ENSGALT00000003088	FNDC7	General function prediction only	fibronectin type III domain containing 7	S70P, D186A, L210S, T329A, S466T, E477K, P521S, Y566H, T568M, T598M, L601M, T692M,	--
ENSGALG00000001988	ENSGALT00000003095	TXNRD2	Energy production and conversion	dihydrolipoyl dehydrogenase	L255S, V262I, K265R,	--
ENSGALG00000002038	ENSGALT00000003168	DENND2C	General function prediction only	suppression of tumorigenicity 5	A235P, M755V, S827R,	--
ENSGALG00000002048	ENSGALT00000003184	GPRIN2	Posttranslational modification, protein turnover, chaperones	G protein regulated inducer of neurite outgrowth 2	G131S, N278S, N282S, S287T, V314A, A491L,	--
ENSGALG00000002053	ENSGALT00000003192	POR	Inorganic ion transport and metabolism	Component of the sulfite reductase complex that catalyzes the 6-electron reduction of sulfite to sulfide. This is one of several activities required for the biosynthesis of L- cysteine from sulfate. The flavoprotein component catalyzes the electron flow from NADPH - FAD - FMN to the hemoprotein component (By similarity)	G76V, I539M, T641A,	G76V,
ENSGALG00000002062	ENSGALT00000003210	SRP68	Intracellular trafficking, secretion, and vesicular transport	Signal-recognition-particle assembly has a crucial role in targeting secretory proteins to the rough endoplasmic reticulum membrane (By similarity)	K368R, S474A,	--
ENSGALG00000002066	ENSGALT00000003215	NCOA4	Transcription	Nuclear receptor coactivator 4	E126G, P205S, P272R, S283F, I485V,	--
ENSGALG00000002090	ENSGALT00000003258	GPSM2	General function prediction only	G-protein signaling modulator	D474E, S537A,	--
ENSGALG00000002091	ENSGALT00000003262	ZDHHC1	General function prediction only	Zinc finger, DHHC-type containing	A19D, V223I, S241N,	--
ENSGALG00000002103	ENSGALT00000003282	TPPP3	Posttranslational modification, protein turnover, chaperones	tubulin polymerization-promoting protein family member	V50I, E97D,	--
ENSGALG00000002105	ENSGALT00000003284	FOXI1	Transcription	forkhead box	S237N,	--
ENSGALG00000002108	ENSGALT00000003290		Function unknown	envoplakin	N1079S, G1814V, N1965S, D1979N,	--
ENSGALG00000002117	ENSGALT00000003306	PARG	Signal transduction mechanisms	Poly (ADP-ribose) glycohydrolase	T89A, N106S, S116C, V124I, K196Q, F274I, K335R, F346L, K399N, K415R,	--
ENSGALG00000002118	ENSGALT00000003307	KCNMB1	Inorganic ion transport and metabolism	Potassium large conductance calcium-activated channel, subfamily M, beta member 1	N69D, M176L,	--
ENSGALG00000002124	ENSGALT00000003320	ZDHHC8	General function prediction only	Zinc finger, DHHC-type containing	G403D,	--
ENSGALG00000002111	ENSGALT00000003325		General function prediction only	PDZ domain (Also known as DHR or GLGF)	I70V,	--
ENSGALG00000002129	ENSGALT00000003326	WDR47	General function prediction only	WD repeat domain 47	N326S, P398A, N495S,	--
ENSGALG00000002131	ENSGALT00000003330	NPRL2	General function prediction only	nitrogen permease regulator-like 2 (S. cerevisiae)	K142R,	--
ENSGALG00000002138	ENSGALT00000003341	HYAL2	Lipid transport and metabolism	hyaluronoglucosaminidase 2	E117A, Q170E, G443D, Q445E,	--
ENSGALG00000002151	ENSGALT00000003372	PEX12	Posttranslational modification, protein turnover, chaperones	Peroxisomal biogenesis factor 12	R156Q,	--
ENSGALG00000002152	ENSGALT00000003373	GABRP	Signal transduction mechanisms	gamma-aminobutyric acid (GABA) A receptor, pi	S77T, E353G, G409S,	--
ENSGALG00000002158	ENSGALT00000003379		Function unknown	Golgin A3	E393D, T571A, T573S, T581A, E752G, I1315M,	--
ENSGALG00000002164	ENSGALT00000003389	DDX59	RNA processing and modification	DEAD (Asp-Glu-Ala-Asp) box polypeptide 59	L193V, E218A, I355T, D383N, T479A, V488L,	--
ENSGALG00000002169	ENSGALT00000003399	PLEKHB2	General function prediction only	pleckstrin homology domain containing, family B (evectins) member 2	D37N, I79V, I125V,	--
ENSGALG00000002183	ENSGALT00000003419	PRR16	Function unknown	proline rich 16	A234T,	--
ENSGALG00000002186	ENSGALT00000003422	UNC45B	Posttranslational modification, protein turnover, chaperones	Unc-45 homolog	D610V, V686I,	--
ENSGALG00000002193	ENSGALT00000003431	ARHGEF4	Signal transduction mechanisms	Rho guanine nucleotide exchange factor (GEF) 4	D501N,	--
ENSGALG00000002201	ENSGALT00000003446	PPL	Cytoskeleton	Periplakin	L64Q, L129Q, I132M, S192N, H238R, Q382R, P453S, T477I, V556I, E612D, G659S, E671D, N734S, Q782K, N819S, Q881R, K884T, K1111Q, K1229Q, R1250W, E1268K, K1321R, Q1345H, V1441L, R1472Q, K1567R, H1601Q, S1604R, D1609E, N1638H, I1710V,	--
ENSGALG00000002204	ENSGALT00000003450	SLC7A4	Amino acid transport and metabolism	amino acid	A410G,	--
ENSGALG00000002219	ENSGALT00000003475	WBP2	Signal transduction mechanisms	WW domain binding protein 2	K43R, N254T,	--
ENSGALG00000002223	ENSGALT00000003480	LHX9	Transcription	Lim homeobox	A185V,	--
ENSGALG00000002225	ENSGALT00000003484	RFFL	Posttranslational modification, protein turnover, chaperones	ring finger protein 34, E3 ubiquitin protein ligase	S75A, D176G,	--
ENSGALG00000002239	ENSGALT00000003504		Replication, recombination and repair	EXOnuclease	S128A, E138G, K293E, G442C, C588S, D659H,	--
ENSGALG00000002247	ENSGALT00000003518	SETD6	General function prediction only	SET domain containing 6	A303E, T374S,	--
ENSGALG00000002263	ENSGALT00000003547	KLHL6	Signal transduction mechanisms	Kelch-like 6 (Drosophila)	L27V, A481S, T572I,	--
ENSGALG00000002266	ENSGALT00000003553	OGDHL	Energy production and conversion	2-oxoglutarate dehydrogenase, E1	I428V,	--
ENSGALG00000002272	ENSGALT00000003564	NOC4L	Translation, ribosomal structure and biogenesis	Nucleolar complex associated 4 homolog (S. cerevisiae)	E488V,	--
ENSGALG00000002278	ENSGALT00000003571	UNK	Posttranslational modification, protein turnover, chaperones	unkempt homolog	T805A, G810A,	--
ENSGALG00000002282	ENSGALT00000003584	TMEM200A	Function unknown	Transmembrane protein 200A	A184S,	--
ENSGALG00000002287	ENSGALT00000003596		Intracellular trafficking, secretion, and vesicular transport	crumbs homolog 1 (Drosophila)	H81Q, V167L, L177F, Q211E, Y215H, L293F, H346R, N378T, K410N, T561A,	--
ENSGALG00000002289	ENSGALT00000003601	CHAT	General function prediction only	carnitine	R78K, I404T, D479N, G518A,	--
ENSGALG00000002299	ENSGALT00000003615	RGR	Intracellular trafficking, secretion, and vesicular transport	Retinal G protein coupled receptor	A135T, Q278H,	--
ENSGALG00000002301	ENSGALT00000003619	CNOT1	Transcription	Ccr4-NOT transcription complex, subunit	H34Q,	--
ENSGALG00000002304	ENSGALT00000003624	ADPRHL2	Posttranslational modification, protein turnover, chaperones	ADP-ribosylhydrolase like 2	I195V,	--
ENSGALG00000002305	ENSGALT00000003625		General function prediction only	Zinc finger and BTB domain containing 41	A46T, N207S, L767I,	--
ENSGALG00000002350	ENSGALT00000003708	DNAH3	Cytoskeleton	Dynein, axonemal, heavy chain	N88S, A268S, G340A, D617E, S830A, L1209I, I1460V, V1710I, K1876R, K2296E, I2561V, T2607A, K2612R, L2931Q, K2966Q, K3282R, D3357E, E3401K, T3515S, V3977A, I3992V,	K2612R,
ENSGALG00000002354	ENSGALT00000003714	PUS1	Translation, ribosomal structure and biogenesis	Formation of pseudouridine at positions 38, 39 and 40 in the anticodon stem and loop of transfer RNAs (By similarity)	E236D, Y378H,	--
ENSGALG00000002377	ENSGALT00000003745	ENO1	Carbohydrate transport and metabolism	Catalyzes the reversible conversion of 2- phosphoglycerate into phosphoenolpyruvate. It is essential for the degradation of carbohydrates via glycolysis (By similarity)	N83S, S310N,	--
ENSGALG00000002408	ENSGALT00000003792	NCDN	Function unknown	Neurochondrin	A70T, K119R, E339A,	--
ENSGALG00000002414	ENSGALT00000003802	TSPAN14	Function unknown	Tetraspanin 14	I150M,	--
ENSGALG00000002424	ENSGALT00000003814	RECQL5	Replication, recombination and repair	atp-dependent dna helicase	I342V, V430A, T431A, Q706P,	--
ENSGALG00000002437	ENSGALT00000003844	FAM69B	Function unknown	family with sequence similarity 69, member B	I325V,	--
ENSGALG00000002452	ENSGALT00000003868	AQP3	Carbohydrate transport and metabolism	Channel that permits osmotically driven movement of water in both directions. It is involved in the osmoregulation and in the maintenance of cell turgor during volume expansion in rapidly growing cells. It mediates rapid entry or exit of water in response to abrupt changes in osmolarity (By similarity)	G145V, G239C,	--
ENSGALG00000002457	ENSGALT00000003874	SIL1	Intracellular trafficking, secretion, and vesicular transport	SIL1 homolog, endoplasmic reticulum chaperone (S. cerevisiae)	D128G, V370M,	--
ENSGALG00000002458	ENSGALT00000003878	VAC14	Intracellular trafficking, secretion, and vesicular transport	vac14 homolog	A363T, K755M,	--
ENSGALG00000002477	ENSGALT00000003906		Intracellular trafficking, secretion, and vesicular transport	UDP-Gal betaGlcNAc beta 1,3-galactosyltransferase, polypeptide 2	V164A,	--
ENSGALG00000002479	ENSGALT00000003908	MAT1A	Coenzyme transport and metabolism	Catalyzes the formation of S-adenosylmethionine from methionine and ATP	V390L,	--
ENSGALG00000002485	ENSGALT00000003916	PHKG1	Signal transduction mechanisms	phosphorylase kinase, gamma	D6E, D160N, V333L,	--
ENSGALG00000002486	ENSGALT00000003917	RNF123	General function prediction only	RING finger protein 123	D571E, Q947R,	--
ENSGALG00000002487	ENSGALT00000003918	SFSWAP	RNA processing and modification	splicing factor, suppressor of white-apricot homolog (Drosophila)	A173S, E824D,	--
ENSGALG00000002506	ENSGALT00000003951	SPSB1	General function prediction only	splA ryanodine receptor domain and SOCS box containing	P232A,	--
ENSGALG00000002510	ENSGALT00000003959	IP6K1	Signal transduction mechanisms	Inositol hexakisphosphate kinase	S140G, F280S,	--
ENSGALG00000002531	ENSGALT00000003987	SF3B3	RNA processing and modification	Splicing factor 3b subunit	H356Q, N671D,	--
ENSGALG00000002542	ENSGALT00000004011	GUSB	Carbohydrate transport and metabolism	hydrolase family 2	I592V,	--
ENSGALG00000002583	ENSGALT00000004070	PIK3CD	Chromatin structure and dynamics ,Cell cycle control, cell division, chromosome partitioning ,Replication, recombination and repair ,Signal transduction mechanisms ,Intracellular trafficking, secretion, and vesicular transport ,	3-kinase, catalytic subunit	I473V, K1001Q,	--
ENSGALG00000002588	ENSGALT00000004076	PPARD	Transcription	peroxisome proliferator-activated receptor	V24A,	--
ENSGALG00000002618	ENSGALT00000004120	KCTD7	Function unknown	BTB POZ domain-containing protein	Y95F,	--
ENSGALG00000002624	ENSGALT00000004133	BMS1	Translation, ribosomal structure and biogenesis	BMS1 homolog, ribosome assembly protein (yeast)	E499G, A623G, F631L, E722D, R736H, M1110I,	--
ENSGALG00000002632	ENSGALT00000004147	CALCRL	Signal transduction mechanisms	calcitonin	M455T,	--
ENSGALG00000002645	ENSGALT00000004171	PIWIL1	Translation, ribosomal structure and biogenesis	piwi-like	H169R, I201V, I587V, F754L,	--
ENSGALG00000002646	ENSGALT00000004172	FAM171B	Function unknown	family with sequence similarity 171, member B	N161D, T323A, I389V, I453M,	--
ENSGALG00000002649	ENSGALT00000004175	UBE4B	Posttranslational modification, protein turnover, chaperones	Ubiquitin conjugation factor E4	E146V, V260A, I351V, S703G,	--
ENSGALG00000002655	ENSGALT00000004182	ITGAV	Extracellular structures	Integrin, alpha	K216R, N508D, I832M,	--
ENSGALG00000002683	ENSGALT00000004228	DECR2	General function prediction only	2,4-dienoyl CoA reductase 2, peroxisomal	Q147E, I163V,	--
ENSGALG00000002689	ENSGALT00000004236	NUP35	Intracellular trafficking, secretion, and vesicular transport	nucleoporin	S140N, S261T, S283T,	--
ENSGALG00000002695	ENSGALT00000004249	SLC15A4	Amino acid transport and metabolism	transporter	D131E, V137I, M246V, R299H, H453Y, T530M,	T530M,
ENSGALG00000002706	ENSGALT00000004266	XRN1	RNA processing and modification ,Cell cycle control, cell division, chromosome partitioning ,Replication, recombination and repair ,	5'-3' exoribonuclease	S495G, M768T, N1003S, V1226I, N1349S, Q1477H,	--
ENSGALG00000002707	ENSGALT00000004270	CHRNB2	Intracellular trafficking, secretion, and vesicular transport	Cholinergic receptor, nicotinic, beta 2 (Neuronal)	M259I,	--
ENSGALG00000002708	ENSGALT00000004272	LINGO1	Function unknown	leucine rich repeat and Ig domain containing	Q188H,	--
ENSGALG00000002714	ENSGALT00000004281	TMEM132C	Function unknown	Transmembrane protein 132E	I452V,	--
ENSGALG00000002728	ENSGALT00000004306	SLC16A3	Carbohydrate transport and metabolism	major facilitator Superfamily	P441A,	--
ENSGALG00000002759	ENSGALT00000004357	PEAK1	Signal transduction mechanisms	pseudopodium-enriched atypical kinase 1-like	Q248K, I683V, V693M, C699S, T747S, N896S, E1032D,	--
ENSGALG00000002762	ENSGALT00000004361	UHRF1BP1	General function prediction only	uhrf1 binding protein	K386R, S409T, Q481R, I1195V, V1212A,	I1195V,
ENSGALG00000002766	ENSGALT00000004369	MLKL	Signal transduction mechanisms	Serine Threonine protein kinase	F213L, K371R, D461N,	--
ENSGALG00000002774	ENSGALT00000004380	TSPAN3	Function unknown	tetraspanin 3	H151R,	--
ENSGALG00000002775	ENSGALT00000004382	FA2H	Energy production and conversion ,Lipid transport and metabolism ,	cytochrome b5	S204A,	--
ENSGALG00000023806	ENSGALT00000004394	PITPNA	Intracellular trafficking, secretion, and vesicular transport	phosphatidylinositol transfer protein	N22K,	--
ENSGALG00000002786	ENSGALT00000004399	PSTPIP1	Signal transduction mechanisms	proline-serine-threonine phosphatase interacting protein	N73S, E411Q,	--
ENSGALG00000002798	ENSGALT00000004428	WDR59	General function prediction only	WD repeat domain 59	P762A,	--
ENSGALG00000002800	ENSGALT00000004430	GRK7	Signal transduction mechanisms	G protein-coupled receptor kinase 7	V157I,	--
ENSGALG00000002831	ENSGALT00000004469	SH3PXD2B	Function unknown	SH3 and PX domains	R710Q,	--
ENSGALG00000002856	ENSGALT00000004510	RUNDC1	Signal transduction mechanisms	RUN domain containing 1	V358I, R372K, V430M,	V430M,
ENSGALG00000002866	ENSGALT00000004522		Function unknown	KAT8 regulatory NSL complex subunit 1-like	S154R, E200Q,	--
ENSGALG00000002877	ENSGALT00000004537	LRRC45	Function unknown	leucine rich repeat containing 45	M202V, I220V, N230S, G517S,	--
ENSGALG00000002880	ENSGALT00000004541		General function prediction only	synthetase	E103G, G141S,	--
ENSGALG00000002886	ENSGALT00000004551	NKX2-5	Transcription	NK2 homeobox 5	N222S,	--
ENSGALG00000002891	ENSGALT00000004557	ACADL	Lipid transport and metabolism	acyl-CoA dehydrogenase	I104V,	--
ENSGALG00000002897	ENSGALT00000004572	SLC16A14	Carbohydrate transport and metabolism	major facilitator Superfamily	K216R,	--
ENSGALG00000002899	ENSGALT00000004577	AACS	Lipid transport and metabolism	acetoacetyl-CoA synthetase	K104R, E653Q,	--
ENSGALG00000002904	ENSGALT00000004583	REEP3	Intracellular trafficking, secretion, and vesicular transport	receptor accessory protein 3	E102D, A216V,	--
ENSGALG00000002906	ENSGALT00000004585	TARDBP	Replication, recombination and repair	TAR DNA binding protein	A391P,	--
ENSGALG00000002907	ENSGALT00000004587	MYL1	Cytoskeleton	myosin, light chain 1, alkali	A14P,	--
ENSGALG00000002911	ENSGALT00000004596	MOXD1	Function unknown	dopamine beta-hydroxylase (dopamine beta-monooxygenase)	E223Q, V250I,	--
ENSGALG00000002919	ENSGALT00000004608	MON1A	Intracellular trafficking, secretion, and vesicular transport	vacuolar fusion protein MON1	G117E,	--
ENSGALG00000002942	ENSGALT00000004648	JMJD1C	General function prediction only	lysine (K)-specific demethylase	Q299L, V501A, A517D, P802S, S979G, S1144G, S1322P, A1427T, L1505V, N1574S,	--
ENSGALG00000002943	ENSGALT00000004650	PRPF8	RNA processing and modification	PRP8 pre-mRNA processing factor 8 homolog (S. cerevisiae)	S1713R,	--
ENSGALG00000002944	ENSGALT00000004656	CPS1	Nucleotide transport and metabolism	carbamoyl-phosphate synthetase ammonia chain	K164R, I451L, I599V, N620D, E621G, K835R, R950H, Q1016R, I1230T,	--
ENSGALG00000002955	ENSGALT00000004669	ADAMTSL2	Posttranslational modification, protein turnover, chaperones	ADAMTS-like 2	A474S, A720T,	--
ENSGALG00000002959	ENSGALT00000004680	NRBF2	Transcription	nuclear receptor binding factor 2	Q57H,	--
ENSGALG00000002981	ENSGALT00000004716	ERCC4	Replication, recombination and repair	Excision repair cross-complementing rodent repair deficiency, complementation group 4	K441E, N472K, S734A,	--
ENSGALG00000002982	ENSGALT00000004719	SLC2A6	Carbohydrate transport and metabolism	sugar transporter	I343V,	--
ENSGALG00000002987	ENSGALT00000004728	SERPINF2	Posttranslational modification, protein turnover, chaperones	Serpin peptidase inhibitor, clade	R151H, T158M, F415L,	--
ENSGALG00000002992	ENSGALT00000004736	DAW1	RNA processing and modification	WD repeat domain 69	T253S,	--
ENSGALG00000002993	ENSGALT00000004742	CA10	Inorganic ion transport and metabolism	Carbonic AnHydrase	V322G,	--
ENSGALG00000003072	ENSGALT00000004849	RPA1	Replication, recombination and repair	replication	T348A, N436S,	--
ENSGALG00000003086	ENSGALT00000004879	EXOSC10	Translation, ribosomal structure and biogenesis	Exonuclease involved in the 3' processing of various precursor tRNAs. Initiates hydrolysis at the 3'-terminus of an RNA molecule and releases 5'-mononucleotides (By similarity)	M635V, D636G, V651A, Q801K,	--
ENSGALG00000003092	ENSGALT00000004888	ERLIN2	Posttranslational modification, protein turnover, chaperones	ER lipid raft associated	A316T,	--
ENSGALG00000003096	ENSGALT00000004893	CBFA2T2	Transcription	core-binding factor, runt domain, alpha subunit 2	L58V,	--
ENSGALG00000003101	ENSGALT00000004898	PROSC	General function prediction only	alanine racemase domain protein	S252P, K254R,	--
ENSGALG00000003110	ENSGALT00000004910		Function unknown		I29T, L303V, K336R,	--
ENSGALG00000003111	ENSGALT00000004911	BFAR	Posttranslational modification, protein turnover, chaperones	Bifunctional apoptosis regulator	M268T, F285L,	--
ENSGALG00000003131	ENSGALT00000004950	DGKE	Lipid transport and metabolism	Diacylglycerol kinase, epsilon 64kDa	K208Q, V210F, M340L, D422N, I436V,	--
ENSGALG00000003143	ENSGALT00000004968	ZC3H7A	General function prediction only	zinc finger CCCH-type containing	E36Q, E352D, E401D, T422P,	--
ENSGALG00000003147	ENSGALT00000004975	TRPC4AP	Posttranslational modification, protein turnover, chaperones	transient receptor potential cation channel, subfamily C, member 4 associated protein	C159W,	--
ENSGALG00000003149	ENSGALT00000004981	ITPR3	Intracellular trafficking, secretion, and vesicular transport	inositol 1,4,5-trisphosphate receptor type	P333A,	--
ENSGALG00000003154	ENSGALT00000004992	TXNDC11	Posttranslational modification, protein turnover, chaperones	thioredoxin domain containing 11	D85E, D122E, I236V, I321L, I329S, D506G, H569R, T597A, D618G, V622A, S663A, T688S, K752E, E871D,	--
ENSGALG00000003172	ENSGALT00000005033	SLC16A9	Amino acid transport and metabolism	solute carrier family 16, member 9 (monocarboxylic acid transporter 9)	P80A, S196P, P199L, L439V, S491R,	--
ENSGALG00000003194	ENSGALT00000005063	ATP6V0A2	Energy production and conversion	ATPase 116 kDa subunit	V148L, A176T,	--
ENSGALG00000003195	ENSGALT00000005064	TRADD	Signal transduction mechanisms	tnfrsf1a-associated via death domain	P10S,	--
ENSGALG00000003206	ENSGALT00000005080	METTL13	General function prediction only	methyltransferase like 13	V181G, T313M, E341K, H537Y, A550S,	--
ENSGALG00000003211	ENSGALT00000005087	POLDIP2	Inorganic ion transport and metabolism	ApaG protein	E259V,	--
ENSGALG00000003224	ENSGALT00000005105	HSF4	Transcription	Heat shock transcription factor 4	A255V,	--
ENSGALG00000003235	ENSGALT00000005121		General function prediction only	zinc finger RNA binding protein	P150T,	--
ENSGALG00000003242	ENSGALT00000005128	STAR	Posttranslational modification, protein turnover, chaperones	START	K107E,	--
ENSGALG00000003256	ENSGALT00000005154	ATP6V0A1	Energy production and conversion	ATPase 116 kDa subunit	N204S, N358T,	--
ENSGALG00000003277	ENSGALT00000005180	SUZ12	Transcription	suppressor of zeste 12 homolog (Drosophila)	I724S,	--
ENSGALG00000003284	ENSGALT00000005193	CRLF3	Transcription	cytokine receptor-like factor 3	E231D,	--
ENSGALG00000003285	ENSGALT00000005196	CDHR2	Intracellular trafficking, secretion, and vesicular transport	cadherin-related family member 2	S594T, F626Y, V950M,	--
ENSGALG00000003289	ENSGALT00000005205	CHUK	Signal transduction mechanisms	Inhibitor of kappa light polypeptide gene enhancer in B-cells, kinase beta	V87I, L120V,	--
ENSGALG00000003298	ENSGALT00000005224	DDX55	Cytoskeleton	atp-dependent rna helicase	S160G, P396A,	--
ENSGALG00000003322	ENSGALT00000005261	TBC1D2B	Intracellular trafficking, secretion, and vesicular transport	TBC1 domain family member	N282S, N381S,	--
ENSGALG00000003325	ENSGALT00000005265	KMT5A	General function prediction only	Histone-lysine N-methyltransferase	L73R, T126P,	--
ENSGALG00000003331	ENSGALT00000005272	FAF2	Signal transduction mechanisms	Fas associated factor family member 2	K346R,	--
ENSGALG00000003334	ENSGALT00000005276	METTL11B	General function prediction only	methyltransferase like 11B	M296T,	--
ENSGALG00000003370	ENSGALT00000005328	KIAA1191	General function prediction only	kiaa1191	K150R,	--
ENSGALG00000003398	ENSGALT00000005373	ADAM9	Posttranslational modification, protein turnover, chaperones	ADAM metallopeptidase domain	K63Q, T76R, S245R, D748G, M758V,	--
ENSGALG00000003405	ENSGALT00000005386	BSDC1	Function unknown	BSD domain containing 1	A118V,	--
ENSGALG00000003430	ENSGALT00000005427	PMS2	Replication, recombination and repair	This protein is involved in the repair of mismatches in DNA. It is required for dam-dependent methyl-directed DNA mismatch repair. May act as a molecular matchmaker , a protein that promotes the formation of a stable complex between two or more DNA-binding proteins in an ATP-dependent manner without itself being part of a final effector complex (By similarity)	E75D, Q160H, K177R, I238V, V301I, L310S, I323V, I377V, T401A, K587E, K644T, N650S, N828S,	--
ENSGALG00000003432	ENSGALT00000005433	AGXT2	Amino acid transport and metabolism	aminotransferase	A115S, V325I,	--
ENSGALG00000003433	ENSGALT00000005435		Amino acid transport and metabolism	Dipeptidase	L124F, K224E, V274A, K343R,	--
ENSGALG00000003434	ENSGALT00000005437	C17orf75	Function unknown	Chromosome 17 open reading frame 75	P86A,	--
ENSGALG00000003458	ENSGALT00000005479	CCZ1	Defense mechanisms	Vacuolar fusion protein CCZ1 homolog	N211S,	--
ENSGALG00000003476	ENSGALT00000005503	ERN1	Signal transduction mechanisms	Serine Threonine protein kinase	Q951R,	--
ENSGALG00000003478	ENSGALT00000005506	GFI1B	Transcription	growth factor- independent	S165A,	--
ENSGALG00000003495	ENSGALT00000005530		Energy production and conversion	Dehydrogenase	A522G,	--
ENSGALG00000003507	ENSGALT00000005546	TECPR1	General function prediction only	Tectonin beta-propeller repeat containing 1	V296I, K561R, I741V,	--
ENSGALG00000003520	ENSGALT00000005570	POLG2	Translation, ribosomal structure and biogenesis	Catalyzes the attachment of glycine to tRNA(Gly) (By similarity)	H269R,	--
ENSGALG00000003536	ENSGALT00000005592	KLHL11	General function prediction only	kelch-like 11 (Drosophila)	V246I, A396S, V473I,	--
ENSGALG00000003537	ENSGALT00000005593	SGK2	Signal transduction mechanisms	serum glucocorticoid regulated kinase	L289V,	--
ENSGALG00000003547	ENSGALT00000005609	SKP2	Posttranslational modification, protein turnover, chaperones	S-phase kinase-associated protein 2, E3 ubiquitin protein ligase	T237S,	--
ENSGALG00000003548	ENSGALT00000005611	BAIAP2L1	Function unknown	BAI1-associated protein 2-like 1	S92R, I228V,	--
ENSGALG00000003553	ENSGALT00000005620	ABCA12	Secondary metabolites biosynthesis, transport and catabolism	ATP-binding cassette sub-family A ABC1 member	S303A, Q310R, T472A, I548V, L815F, N940S, P1232A, Q1291R, D1309E, I1441V, F1570S, L1840P, I1889V,	--
ENSGALG00000003559	ENSGALT00000005634	ACTR5	Cytoskeleton	ARP5 actin-related protein 5 homolog (yeast)	L336M, I413M, I472V, K508R,	--
ENSGALG00000003560	ENSGALT00000005637	SLC6A2	Inorganic ion transport and metabolism	Transporter	E604Q, L629V,	--
ENSGALG00000003570	ENSGALT00000005653	ATIC	Nucleotide transport and metabolism	bifunctional purine biosynthesis protein PURH	I77V, A204T, V276M,	--
ENSGALG00000003589	ENSGALT00000005678	VTN	Extracellular structures	vitronectin	P98L, P358S,	--
ENSGALG00000003596	ENSGALT00000005688	TRRAP	Chromatin structure and dynamics ,Cell cycle control, cell division, chromosome partitioning ,Replication, recombination and repair ,Signal transduction mechanisms ,Intracellular trafficking, secretion, and vesicular transport ,	3-kinase, catalytic subunit	E2127V,	--
ENSGALG00000023749	ENSGALT00000005721	DARS2	Translation, ribosomal structure and biogenesis	aspartyl-trna synthetase	I404V, S525G,	--
ENSGALG00000003636	ENSGALT00000005760	FBLIM1	Signal transduction mechanisms	Filamin binding LIM protein 1	W134L,	--
ENSGALG00000003651	ENSGALT00000005786	NT5C3B	Nucleotide transport and metabolism	5'-nucleotidase, cytosolic	T91S, K114R,	--
ENSGALG00000003674	ENSGALT00000005822	DHTKD1	Energy production and conversion	2-oxoglutarate dehydrogenase, E1	N353S, A472G,	--
ENSGALG00000003677	ENSGALT00000005827	NTNG2	Signal transduction mechanisms	Netrin G2	K474R,	--
ENSGALG00000003691	ENSGALT00000005847	RNF145	Posttranslational modification, protein turnover, chaperones	Ring finger protein 145	D624G, S627G,	--
ENSGALG00000003709	ENSGALT00000005886	PLAT	Posttranslational modification, protein turnover, chaperones	protease	T87A, K130R, V282I, E403D, D420N,	V282I, K130R,
ENSGALG00000003716	ENSGALT00000005897	GDNF	RNA processing and modification	Glial cell derived neurotrophic factor	K112R,	--
ENSGALG00000003720	ENSGALT00000005906	FANCD2	Function unknown	Fanconi anemia complementation group d2	K6Q, K36E, I139V, V208A, R254H, T271A, K293R, V377A, I494V, T541M, F621Y, N721S, T984S, D1044N, I1132V, I1200V, C1219R, S1221A, I1277V,	--
ENSGALG00000003722	ENSGALT00000005910	THG1L	Function unknown	tRNA-histidine guanylyltransferase 1-like (S. cerevisiae)	E63D, V185A, L229S, I250V, Y286H,	--
ENSGALG00000003742	ENSGALT00000005938	CPAMD8	General function prediction only	C3 and PZP-like, alpha-2-macroglobulin domain containing 8	D79G, M188V, P1360Q,	--
ENSGALG00000003750	ENSGALT00000005954	PLCG1	Lipid transport and metabolism	Phospholipase C gamma	M219V, L353V, V1177I,	--
ENSGALG00000003757	ENSGALT00000005964	POMT1	Posttranslational modification, protein turnover, chaperones	Dolichyl-phosphate-mannose--protein mannosyltransferase	L5M, W187C, N230T, G286V,	--
ENSGALG00000003759	ENSGALT00000005967	RORA	Transcription	RAR-related orphan receptor	E252D,	--
ENSGALG00000003765	ENSGALT00000005974	A1CF	General function prediction only	synaptotagmin binding, cytoplasmic RNA interacting protein	I442V, S482N, T504N, A539S,	S482N, A539S,
ENSGALG00000003767	ENSGALT00000005977	NKD1	Signal transduction mechanisms	Naked cuticle homolog 1 (Drosophila)	V103I, L211F, A222V, V362I,	--
ENSGALG00000003778	ENSGALT00000005994	TMEM38A	Inorganic ion transport and metabolism	transmembrane protein 38a	V44E, A234G, S254G,	--
ENSGALG00000003786	ENSGALT00000006006	BRD7	Transcription	bromodomain containing	D508E, S624N,	--
ENSGALG00000003794	ENSGALT00000006018		Intracellular trafficking, secretion, and vesicular transport	solute carrier family 35 member E1	T347A, N394S,	--
ENSGALG00000003799	ENSGALT00000006026	USP4	Posttranslational modification, protein turnover, chaperones	ubiquitin carboxyl-terminal hydrolase	I175L, I684T, D719E, T931A,	--
ENSGALG00000003816	ENSGALT00000006051	NT5C1A	Nucleotide transport and metabolism	5'-nucleotidase, cytosolic	V390I,	--
ENSGALG00000003824	ENSGALT00000006060	CHERP	Function unknown	Calcium homeostasis endoplasmic reticulum protein	T387A,	--
ENSGALG00000003854	ENSGALT00000006126	IFT81	General function prediction only	intraflagellar transport 81 homolog (Chlamydomonas)	Q224H, N273S, K491R,	--
ENSGALG00000003857	ENSGALT00000006130	ITK	Signal transduction mechanisms	IL2-inducible T-cell kinase	H311Y, I615V,	--
ENSGALG00000003882	ENSGALT00000006174	SMARCE1	Chromatin structure and dynamics	SWI SNF related, matrix associated, actin dependent regulator of chromatin, subfamily e, member 1	N316S,	--
ENSGALG00000003893	ENSGALT00000006190	XPR1	Intracellular trafficking, secretion, and vesicular transport	Xenotropic and polytropic retrovirus receptor 1	A497D,	--
ENSGALG00000003901	ENSGALT00000006200	P2RX4	Intracellular trafficking, secretion, and vesicular transport	purinergic receptor P2X, ligand-gated ion channel	V161I, T208S,	--
ENSGALG00000003904	ENSGALT00000006204	MLPH	Function unknown	Melanophilin	P318S, E436G, S448P, S449G, C497S, A541V,	--
ENSGALG00000003906	ENSGALT00000006206	MPHOSPH10	Translation, ribosomal structure and biogenesis	u3 small nucleolar ribonucleoprotein	T140A, S147N, K244E, N272D, I286V, E589G, L648S,	--
ENSGALG00000003909	ENSGALT00000006220	PIGT	Carbohydrate transport and metabolism	Phosphatidylinositol glycan anchor biosynthesis, class T	A226S, A473T, M474V,	--
ENSGALG00000003919	ENSGALT00000006244	MRPL22	Translation, ribosomal structure and biogenesis	ribosomal protein, L22	K49R, K133R,	--
ENSGALG00000003932	ENSGALT00000006265	SDC4	Signal transduction mechanisms	Cell surface proteoglycan (By similarity)	D60E, K104E, P120S, N136T,	--
ENSGALG00000003937	ENSGALT00000006272	GEMIN5	General function prediction only	gem (nuclear organelle) associated protein 5	A40V, T192S, P311S, P646H, E1013D, I1018T, S1099C, K1126R, Q1275P,	--
ENSGALG00000003939	ENSGALT00000006275		Transcription	Kruppel-like factor 2 (Lung)	V146M, G234S,	--
ENSGALG00000003955	ENSGALT00000006306		Cytoskeleton	centrosomal protein 350kDa	E157D, A211V, Q499R, M699T, Y787H, S922T, G987E, E1198D, V1339M, R1416Q, V1470A, K1561N, T1650N,	--
ENSGALG00000003958	ENSGALT00000006309	PRMT3	General function prediction only	Protein arginine methyltransferase	E122Q, I242M, K274R, L315V,	--
ENSGALG00000003985	ENSGALT00000006347	TARSL2	Translation, ribosomal structure and biogenesis	Threonyl-trna synthetase	N429D, Q696R,	--
ENSGALG00000004018	ENSGALT00000006397	GLYCTK	Carbohydrate transport and metabolism	Glycerate kinase	T136A, A137V, Y271F, Q454R,	--
ENSGALG00000004019	ENSGALT00000006401	MARS2	Translation, ribosomal structure and biogenesis	Is required not only for elongation of protein synthesis but also for the initiation of all mRNA translation through initiator tRNA(fMet) aminoacylation (By similarity)	V108I, K291R, E414G,	--
ENSGALG00000004033	ENSGALT00000006422	GALNT10	General function prediction only	UDP-N-acetyl-alpha-D-galactosamine polypeptide N-acetylgalactosaminyltransferase 10 (GalNAc-T10)	K143R,	--
ENSGALG00000004040	ENSGALT00000006432	MFAP3	Intracellular trafficking, secretion, and vesicular transport	microfibrillar-associated protein 3	S35P,	--
ENSGALG00000004044	ENSGALT00000006436	CSRP3	Posttranslational modification, protein turnover, chaperones	Cysteine and glycine-rich protein 3 (Cardiac LIM protein)	L36H, V116A,	--
ENSGALG00000004065	ENSGALT00000006467	SLC25A16	Function unknown	solute carrier family 25 (mitochondrial carrier)	L308V,	--
ENSGALG00000004068	ENSGALT00000006471	FAM114A2	Function unknown	Family with sequence similarity 114, member A2	K355E, E358K, E377Q,	--
ENSGALG00000004074	ENSGALT00000006480	KCNS1	Inorganic ion transport and metabolism	potassium voltage-gated channel, delayed-rectifier, subfamily S, member 1	V220M,	--
ENSGALG00000004108	ENSGALT00000006533	CCAR1	Cell cycle control, cell division, chromosome partitioning	cell division cycle and apoptosis regulator 1	V871E,	--
ENSGALG00000004111	ENSGALT00000006538	GPR174	Intracellular trafficking, secretion, and vesicular transport	G protein-coupled receptor 174	T20M, D170G, A236V,	--
ENSGALG00000004153	ENSGALT00000006602	NADSYN1	Coenzyme transport and metabolism	nh(3)-dependent nad( ) synthetase	I146V, A306T, E625G, S634T,	--
ENSGALG00000004155	ENSGALT00000006605	MYOM3	Function unknown	myomesin 3	L74F, F288L, K607R, S659G, R739Q, L889F, A900V, I991V, K1284R, Y1344F, P1412L,	--
ENSGALG00000004156	ENSGALT00000006608	KIF1BP	Function unknown	kiaa1279	T531A,	--
ENSGALG00000004162	ENSGALT00000006617	SLC16A6	Lipid transport and metabolism	solute carrier family 16, member 6 (monocarboxylic acid transporter 7)	N279K,	--
ENSGALG00000004169	ENSGALT00000006629		General function prediction only	Fibronectin type III domain containing 3A	I53V, I377V, F596V, I675V, I763M, T764A, L914Q,	--
ENSGALG00000004176	ENSGALT00000006637	ATOX1	Inorganic ion transport and metabolism	ATX1 antioxidant protein 1 homolog (yeast)	H24Q,	--
ENSGALG00000004184	ENSGALT00000006650	SPARC	Extracellular structures	secreted protein, acidic, cysteine-rich (osteonectin)	D115E,	--
ENSGALG00000004186	ENSGALT00000006652	NSRP1	RNA processing and modification	Nuclear speckle splicing regulatory protein	K82Q, E324G, E455D, K456R,	--
ENSGALG00000004190	ENSGALT00000006657	RNF34	Posttranslational modification, protein turnover, chaperones	ring finger protein 34, E3 ubiquitin protein ligase	L146A, G199V,	--
ENSGALG00000004191	ENSGALT00000006659	RIC8A	Posttranslational modification, protein turnover, chaperones	Resistance to inhibitors of cholinesterase 8 homolog	E87G, R139Q, S269C,	--
ENSGALG00000004195	ENSGALT00000006667	KIF4A	Cytoskeleton	Kinesin family member	D302G, N466K, I616M, D1026E,	--
ENSGALG00000004199	ENSGALT00000006682	TMEM184A	Function unknown	transmembrane protein 184B	T21A, A28T, A131G,	--
ENSGALG00000004212	ENSGALT00000006698	ADAM10	Extracellular structures	ADAM metallopeptidase domain 10	S177A, Q734P,	--
ENSGALG00000004215	ENSGALT00000006701	WIPI1	General function prediction only	WD repeat domain, phosphoinositide interacting	I28V, T31A, M126L, I147S, G293V,	M126L, G293V,
ENSGALG00000004216	ENSGALT00000006703	TOR3A	General function prediction only	torsin family 3, member A	E87D, L255V, N282S,	--
ENSGALG00000004220	ENSGALT00000006710	SERINC3	Function unknown	serine incorporator	V221I, L277F, D470N,	--
ENSGALG00000004222	ENSGALT00000006719	HK1	Carbohydrate transport and metabolism	hexokinase	R873K,	--
ENSGALG00000004230	ENSGALT00000006735	LIPC	Lipid transport and metabolism	Lipase, hepatic	F332Y, F411L,	--
ENSGALG00000004244	ENSGALT00000006749	TTPAL	Lipid transport and metabolism	Tocopherol (Alpha) transfer protein-like	H297R,	--
ENSGALG00000004246	ENSGALT00000006753	SLC6A4	Inorganic ion transport and metabolism	Transporter	N283H, V497I, W498R, A572T,	--
ENSGALG00000004251	ENSGALT00000006763	ARR3	Signal transduction mechanisms	arrestin	Y225F, I255V, N276S, T356P,	--
ENSGALG00000004260	ENSGALT00000006774	PKP3	Intracellular trafficking, secretion, and vesicular transport	Plakophilin 3	G712A, Y737W,	--
ENSGALG00000004262	ENSGALT00000006778	TMIGD1	Signal transduction mechanisms	transmembrane and immunoglobulin domain containing 1	N57D, D107N, S179T,	--
ENSGALG00000004267	ENSGALT00000006784	SIGIRR	Intracellular trafficking, secretion, and vesicular transport	single immunoglobulin and toll-interleukin 1 receptor (TIR) domain	V141M,	--
ENSGALG00000004290	ENSGALT00000006824	ANGPTL1	General function prediction only	Angiopoietin-like	S17A, G19R, F386I,	--
ENSGALG00000004293	ENSGALT00000006829		Posttranslational modification, protein turnover, chaperones	protease	S20N, P265S, S351F, N477S, L631V, K732R,	--
ENSGALG00000004311	ENSGALT00000006867	AGGF1	RNA processing and modification	Angiogenic factor with G patch and FHA domains	V111A, H113N, N151D, E160R,	--
ENSGALG00000004320	ENSGALT00000006879	FAT2	Posttranslational modification, protein turnover, chaperones	FAT tumor suppressor homolog 2 (Drosophila)	K232M, G236R, G238A, K263E, K388R, Q698H, I709M, I732V, T785S, V835I, D866E, T1262A, V1367I, I1543V, Q1682R, S1846G, I2100M, I2162V, E2260D, H2355Q, T2394M, I2932V, E2964Q, L3893V, G4342S,	K232M, Q1682R, E2964Q,
ENSGALG00000004321	ENSGALT00000006887	OSER1	Function unknown	chromosome 20 open reading frame 111	V43L, D113E, S154C, T159S,	--
ENSGALG00000004332	ENSGALT00000006906	PLA2G12B	Lipid transport and metabolism	Phospholipase A2, group	T52S,	--
ENSGALG00000021399	ENSGALT00000006909		Secondary metabolites biosynthesis, transport and catabolism	ATP-binding cassette sub-family A ABC1 member	I128V, S170N, I403F, S627A, M846V, S1122A, A1272T, I1408L, E1475Q,	--
ENSGALG00000004343	ENSGALT00000006930	HPD	Amino acid transport and metabolism	4-Hydroxyphenylpyruvate dioxygenase	S276L,	--
ENSGALG00000004345	ENSGALT00000006932	OIT3	Signal transduction mechanisms	oncoprotein induced transcript 3	T168I, K271T, D398N,	--
ENSGALG00000004363	ENSGALT00000006957	MCM3AP	Cell cycle control, cell division, chromosome partitioning ,Intracellular trafficking, secretion, and vesicular transport ,	minichromosome maintenance complex component 3 associated protein	S396G, A491T, N630S, N653K, T780A, E1324G, K1403R, V1452I, S1551A, R1612M, S1733G, M1735A,	--
ENSGALG00000004365	ENSGALT00000006963	WDR66	General function prediction only	WD repeat domain 66	E145Q, V261A, D330G, S416T, L617M, G645A, Y647C, L715P, I808T, C851Y, A856V,	--
ENSGALG00000004369	ENSGALT00000006970	PYGO1	General function prediction only	pygopus homolog 1 (Drosophila)	T294A, S306P,	--
ENSGALG00000004373	ENSGALT00000006974	KCNJ16	Intracellular trafficking, secretion, and vesicular transport	Potassium inwardly-rectifying channel subfamily J member 16	E369Q, C394Y,	--
ENSGALG00000004376	ENSGALT00000006978	KCNJ2	Intracellular trafficking, secretion, and vesicular transport	Potassium inwardly-rectifying channel, subfamily J, member	Y242F,	--
ENSGALG00000004383	ENSGALT00000006990	TIMM22	Posttranslational modification, protein turnover, chaperones	Mitochondrial import inner membrane translocase subunit	V172M,	--
ENSGALG00000004398	ENSGALT00000007013	CARD11	Function unknown	caspase recruitment domain family, member 11	N571S,	--
ENSGALG00000004416	ENSGALT00000007038	TTC19	Cytoskeleton	tetratricopeptide repeat domain 19	E255K, R264K,	--
ENSGALG00000004428	ENSGALT00000007052		Function unknown	histamine receptor	T215S, E236D, K281N,	--
ENSGALG00000004431	ENSGALT00000007055	SAR1A	Intracellular trafficking, secretion, and vesicular transport	Small GTPase component of the coat protein complex II (COPII) which promotes the formation of transport vesicles from the endoplasmic reticulum (ER). The coat has two main functions, the physical deformation of the endoplasmic reticulum membrane into vesicles and the selection of cargo molecules. SAR1 controls the coat assembly in a stepwise manner. Activated SAR1-GTP binds to membranes first and…	T60A, N116K, A170T,	--
ENSGALG00000004442	ENSGALT00000007067	PPA1	Energy production and conversion	Pyrophosphatase (Inorganic)	V163A, V281G,	--
ENSGALG00000004446	ENSGALT00000007077	NPFFR1	General function prediction only	Neuropeptide FF receptor 1	A269V,	--
ENSGALG00000004472	ENSGALT00000007121	ASTN1	Signal transduction mechanisms	astrotactin	N697S, P900S,	--
ENSGALG00000004491	ENSGALT00000007151	DMGDH	Amino acid transport and metabolism	Catalyzes the last two steps in the biosynthesis of 5- methylaminomethyl-2-thiouridine (mnm(5)s(2)U) at the wobble position (U34) in tRNA. Catalyzes the FAD-dependent demodification of cmnm(5)s(2)U34 to nm(5)s(2)U34, followed by the transfer of a methyl group from S-adenosyl-L-methionine to nm(5)s(2)U34, to form mnm(5)s(2)U34 (By similarity)	Y148F, G268E, P349T,	G268E, P349T,
ENSGALG00000004494	ENSGALT00000007159	CCNE1	Cell cycle control, cell division, chromosome partitioning	cyclin E1	T97I, I349V,	--
ENSGALG00000004498	ENSGALT00000007167	SLC2A10	Carbohydrate transport and metabolism	Solute carrier family 2, facilitated glucose transporter member	H246R, A352T,	--
ENSGALG00000004531	ENSGALT00000007216	PLOD1	Posttranslational modification, protein turnover, chaperones	Procollagen-lysine, 2-oxoglutarate 5-dioxygenase	T114A, I295V, R534K,	--
ENSGALG00000004545	ENSGALT00000007237	WDR72	General function prediction only	WD repeat domain 72	S208P, F257L, L374I, P411H, I603V, T711A, S763C, C826H, T849A, L854P, I925T,	--
ENSGALG00000004553	ENSGALT00000007247	SGPL1	Amino acid transport and metabolism	decarboxylase	S121L, T444M, H554Y,	--
ENSGALG00000004557	ENSGALT00000007252	WIPI2	General function prediction only	WD repeat domain, phosphoinositide interacting	S383G, T402S,	--
ENSGALG00000004562	ENSGALT00000007260	HVCN1	Intracellular trafficking, secretion, and vesicular transport	Hydrogen voltage-gated channel 1	K192R, H209Q,	--
ENSGALG00000004590	ENSGALT00000007303	CLCN6	Inorganic ion transport and metabolism	Chloride Channel	S65T,	--
ENSGALG00000004591	ENSGALT00000007304	SERPINC1	Posttranslational modification, protein turnover, chaperones	Serpin peptidase inhibitor, clade	L202I, S413F,	--
ENSGALG00000004597	ENSGALT00000007316	ZBTB37	General function prediction only	zinc finger and BTB domain containing 37	A376P,	--
ENSGALG00000004611	ENSGALT00000007337	FBXL18	Function unknown	F-box and leucine-rich repeat protein 18	K443R, L455V, A459E, I657L,	--
ENSGALG00000004613	ENSGALT00000007345	P2RX5	Intracellular trafficking, secretion, and vesicular transport	purinergic receptor P2X, ligand-gated ion channel	K154R, G400D,	--
ENSGALG00000004614	ENSGALT00000007346	NPL	Amino acid transport and metabolism	Catalyzes the condensation of (S)-aspartate-beta- semialdehyde (S)-ASA and pyruvate to 4-hydroxy- tetrahydrodipicolinate (HTPA) (By similarity)	E39K, A297V,	--
ENSGALG00000004623	ENSGALT00000007362	AGTRAP	Intracellular trafficking, secretion, and vesicular transport	angiotensin II receptor-associated protein	T61A,	--
ENSGALG00000004628	ENSGALT00000007373	CTNS	Amino acid transport and metabolism	cystinosin, lysosomal cystine transporter	S119T, V122M, V236T,	--
ENSGALG00000004629	ENSGALT00000007374	RNF216	Posttranslational modification, protein turnover, chaperones	ring finger protein 216	A309V,	--
ENSGALG00000004637	ENSGALT00000007388		Carbohydrate transport and metabolism	Carbohydrate kinase	R33Q, S264C, D300G, T330A,	--
ENSGALG00000004650	ENSGALT00000007407	BRAP	General function prediction only	BRCA1 associated protein	F210L, N450S,	--
ENSGALG00000004655	ENSGALT00000007417	SMURF1	Posttranslational modification, protein turnover, chaperones	e3 ubiquitin protein ligase	N327K,	--
ENSGALG00000004660	ENSGALT00000007425	TRPV3	Intracellular trafficking, secretion, and vesicular transport	transient receptor potential cation channel, subfamily V, member 3	E202G, K312N, F443L, N465H, S503G, V593L, K714R, T756A,	--
ENSGALG00000004662	ENSGALT00000007427	DISP3	Signal transduction mechanisms	patched domain containing 2	G173A,	--
ENSGALG00000004665	ENSGALT00000007433	KPNA7	Intracellular trafficking, secretion, and vesicular transport	importin subunit alpha	E254K,	--
ENSGALG00000004700	ENSGALT00000007487	NCF2	General function prediction only	Neutrophil cytosolic factor 2	N157S, Q448R,	--
ENSGALG00000004710	ENSGALT00000007504	TMOD3	Function unknown	tropomodulin 3 (ubiquitous)	V342G,	--
ENSGALG00000004722	ENSGALT00000007519	ASPN	Function unknown	LRRNT	T65M, K104R, Q259H,	--
ENSGALG00000004725	ENSGALT00000007523		Energy production and conversion	Dehydrogenase	M297L,	--
ENSGALG00000004727	ENSGALT00000007525	ULK2	Signal transduction mechanisms	unc51-like kinase	E252G,	--
ENSGALG00000004728	ENSGALT00000007530	RGL1	General function prediction only	Ral guanine nucleotide dissociation	Q478R,	--
ENSGALG00000004729	ENSGALT00000007532	SLC7A10	Amino acid transport and metabolism	amino acid	W468C,	--
ENSGALG00000021158	ENSGALT00000007533	SLC7A9	Amino acid transport and metabolism	amino acid	S286P, I415V,	--
ENSGALG00000004734	ENSGALT00000007539		Function unknown	eva-1 homolog C (C. elegans)	L239I,	--
ENSGALG00000004741	ENSGALT00000007553	EPHB2	Signal transduction mechanisms	Serine Threonine protein kinase	A539G,	--
ENSGALG00000004756	ENSGALT00000007588	CEP89	Function unknown	centrosomal protein 89kDa	E221G, L513A, N567S, Q583E,	--
ENSGALG00000004760	ENSGALT00000007595	TMEM116	Function unknown	Transmembrane protein 116	V343I,	--
ENSGALG00000004767	ENSGALT00000007603	ODF2	Cytoskeleton	outer dense fiber of sperm tails 2	K137R, I323M, S708A, K721R, S740A, N757S,	--
ENSGALG00000004794	ENSGALT00000007651	H2AFY2	General function prediction only	appr-1-p processing domain protein	V141L,	--
ENSGALG00000021230	ENSGALT00000007669	EPB42	Function unknown	erythrocyte membrane protein band	H22R, Q89K, Q153E, E505D, Q642E,	--
ENSGALG00000021232	ENSGALT00000007671	TGM6	Posttranslational modification, protein turnover, chaperones	transglutaminase 3 (E polypeptide, protein-glutamine-gamma-glutamyltransferase)	L124I, Q125R, T381I, F430C, A490T, S543L, T594I, S702P,	--
ENSGALG00000027245	ENSGALT00000007679	GLOD4	Carbohydrate transport and metabolism	glyoxalase domain containing 4	N284S,	--
ENSGALG00000004825	ENSGALT00000007708	HDAC8	Chromatin structure and dynamics ,Secondary metabolites biosynthesis, transport and catabolism ,	Histone deacetylase	I166V,	--
ENSGALG00000004879	ENSGALT00000007788	SLC6A11	Inorganic ion transport and metabolism	Transporter	Q181P,	--
ENSGALG00000004924	ENSGALT00000007878	OPNP	Signal transduction mechanisms	Visual pigments are the light-absorbing molecules that mediate vision. They consist of an apoprotein, opsin, covalently linked to cis-retinal	N191S, T243S, C314R,	--
ENSGALG00000004945	ENSGALT00000007915	SLC12A1	Amino acid transport and metabolism	amino acid	M451I, K852N,	--
ENSGALG00000004946	ENSGALT00000007918		Intracellular trafficking, secretion, and vesicular transport	Collagen, type IV, alpha 4	G119V, Q162E, I556V, K616I, Q746R, R851G, L1003F, R1235C,	--
ENSGALG00000004955	ENSGALT00000007945		Signal transduction mechanisms ,Intracellular trafficking, secretion, and vesicular transport ,	SyNapsiN	Y45F,	--
ENSGALG00000004966	ENSGALT00000007965	NYAP2	Signal transduction mechanisms	neuronal tyrosine-phosphorylated phosphoinositide-3-kinase adaptor 2	P384S, N473S,	--
ENSGALG00000004991	ENSGALT00000007996	MKRN2	General function prediction only	Cleavage and polyadenylation	E401D,	--
ENSGALG00000005017	ENSGALT00000008034	DUSP13	Signal transduction mechanisms	Dual specificity protein phosphatase	N112S, S165P,	--
ENSGALG00000005028	ENSGALT00000008050	TOP3A	Replication, recombination and repair	Releases the supercoiling and torsional tension of DNA, which is introduced during the DNA replication and transcription, by transiently cleaving and rejoining one strand of the DNA duplex. Introduces a single-strand break via transesterification at a target site in duplex DNA. The scissile phosphodiester is attacked by the catalytic tyrosine of the enzyme, resulting in the formation of a DNA-(5'…	K201Q, N390S, Q401H, T425A, Q617E, R658Q, V691I, H1020Q,	--
ENSGALG00000005030	ENSGALT00000008057	DOCK10	Signal transduction mechanisms	dedicator of cytokinesis	D60N, I435M, I636V, S808G, H893Q, T1988M,	--
ENSGALG00000005034	ENSGALT00000008070	ACAD9	Lipid transport and metabolism	acyl-CoA dehydrogenase	S213N, E268D, Y582D,	--
ENSGALG00000005038	ENSGALT00000008077	CENPI	Function unknown	Centromere protein I	K74R, Y197F, Q272L, N310H, S324G, S450T, Y550H, Q629E, Q633R, V669A, F676L,	--
ENSGALG00000005054	ENSGALT00000008105	DKC1	Translation, ribosomal structure and biogenesis	Responsible for synthesis of pseudouridine from uracil- 55 in the psi GC loop of transfer RNAs (By similarity)	A431P,	--
ENSGALG00000005062	ENSGALT00000008117	FoxN4	Transcription	forkhead box	T171A,	--
ENSGALG00000005074	ENSGALT00000008132	FAM102A	Function unknown	family with sequence similarity 102, member A	V117A,	--
ENSGALG00000005079	ENSGALT00000008145	VCL	Cytoskeleton	Vinculin	M534L,	--
ENSGALG00000005080	ENSGALT00000008146	C8H1ORF27	Function unknown	chromosome 1 open reading frame 27	S65C, R122W, A170P, P195A, H197Y, V272I, R335G, T412M,	--
ENSGALG00000005084	ENSGALT00000008153	TRIM37	General function prediction only	tripartite motif containing 37	S450A, S597R, L642I, A648T, G795A, G887A,	--
ENSGALG00000005086	ENSGALT00000008157	PLAU	Posttranslational modification, protein turnover, chaperones	protease	H70R, Q148R, V250E,	--
ENSGALG00000005092	ENSGALT00000008165	HDAC11	Chromatin structure and dynamics ,Secondary metabolites biosynthesis, transport and catabolism ,	Histone deacetylase	K53N, K112R, R197K,	--
ENSGALG00000005107	ENSGALT00000008188		Function unknown	N-deacetylase N-sulfotransferase (Heparan glucosaminyl)	V407M, G680S,	--
ENSGALG00000005121	ENSGALT00000008225	TAF4	Transcription	RNA polymerase II, TATA box binding protein (TBP)-associated factor	N251S, A725T,	--
ENSGALG00000005125	ENSGALT00000008232	LSM14B	Function unknown	LSM14A, SCD6 homolog A (S. cerevisiae)	V240A, T283P,	--
ENSGALG00000005126	ENSGALT00000008234	DHX40	Replication, recombination and repair	helicase	H375Y,	--
ENSGALG00000005134	ENSGALT00000008243	ZSWIM8	General function prediction only	zinc finger SWIM-type containing 8	E1095G, A1447T,	--
ENSGALG00000005135	ENSGALT00000008246	SERPINE2	Posttranslational modification, protein turnover, chaperones	Serpin peptidase inhibitor, clade	A255V, T403S,	--
ENSGALG00000005146	ENSGALT00000008264	PDP2	Signal transduction mechanisms	phosphatase 2C	Y27F, I88V, S206T, L323I, S422G, N438H,	--
ENSGALG00000005158	ENSGALT00000008282	WDFY1	General function prediction only	WD repeat and FYVE domain containing	S69C,	--
ENSGALG00000005160	ENSGALT00000008286	VMP1	Function unknown	vacuole membrane protein	L51V,	--
ENSGALG00000005164	ENSGALT00000008294	MTG2	General function prediction only	An essential GTPase which binds GTP, GDP and possibly (p)ppGpp with moderate affinity, with high nucleotide exchange rates and a fairly low GTP hydrolysis rate (By similarity). It may play a role in control of the cell cycle, stress response, ribosome biogenesis and in those bacteria that undergo differentiation, in morphogenesis control	H117N, E159A,	--
ENSGALG00000005170	ENSGALT00000008300	HRH3	Signal transduction mechanisms	histamine receptor	F269L, K291E, T296A, V347A,	--
ENSGALG00000005173	ENSGALT00000008304	TUBD1	Cytoskeleton	Tubulin is the major constituent of microtubules. It binds two moles of GTP, one at an exchangeable site on the beta chain and one at a non-exchangeable site on the alpha chain (By similarity)	S291N, I342L, L358V,	--
ENSGALG00000005181	ENSGALT00000008325	SEC24C	Intracellular trafficking, secretion, and vesicular transport	SEC24 family, member	S170G, L358V, V860I, V987L,	--
ENSGALG00000005205	ENSGALT00000008358	RNFT1	Posttranslational modification, protein turnover, chaperones	Ring finger protein, transmembrane	I337V,	--
ENSGALG00000005206	ENSGALT00000008360	ACSL3	Lipid transport and metabolism	Amp-dependent synthetase and ligase	P596S, A603V, S606N, N641K,	--
ENSGALG00000005209	ENSGALT00000008364	AQP1	Carbohydrate transport and metabolism	Channel that permits osmotically driven movement of water in both directions. It is involved in the osmoregulation and in the maintenance of cell turgor during volume expansion in rapidly growing cells. It mediates rapid entry or exit of water in response to abrupt changes in osmolarity (By similarity)	V116I,	--
ENSGALG00000005226	ENSGALT00000008397	MYOZ1	Posttranslational modification, protein turnover, chaperones	Myozenin 1	P105S,	--
ENSGALG00000005229	ENSGALT00000008401	DPH5	Translation, ribosomal structure and biogenesis	S-adenosyl-L-methionine-dependent methyltransferase that catalyzes the trimethylation of the amino group of the modified target histidine residue in translation elongation factor 2 (EF- 2), to form an intermediate called diphthine. The three successive methylation reactions represent the second step of diphthamide biosynthesis (By similarity)	D73E, R179K, S241A, E277D,	--
ENSGALG00000005230	ENSGALT00000008405	MED13	Transcription	Mediator complex, subunit	I724M,	--
ENSGALG00000005236	ENSGALT00000008412	FARSB	Translation, ribosomal structure and biogenesis	phenylalanyl-tRNA synthetase (beta subunit)	E51K, V61I, H210Q, T342I, L418Q, I432V, I463V,	--
ENSGALG00000005242	ENSGALT00000008424		Function unknown	vasoactive intestinal polypeptide receptor 1-like	Q94E, F247L, Q267R, G407R,	Q267R,
ENSGALG00000005245	ENSGALT00000008427	SGPP2	Lipid transport and metabolism	PHOsphatase	I113V, T201M, A322T, P353S, T380A,	--
ENSGALG00000005249	ENSGALT00000008433	BICD2	Intracellular trafficking, secretion, and vesicular transport	bicaudal D homolog	S564N,	--
ENSGALG00000005251	ENSGALT00000008435	CMTM4	General function prediction only	CKLF-like MARVEL transmembrane domain containing 4	Q182P,	--
ENSGALG00000005257	ENSGALT00000008441		Signal transduction mechanisms	vascular cell adhesion molecule 1	A32P, N89H, S126P, I270V, I307V, V534I,	--
ENSGALG00000005268	ENSGALT00000008454	SEC22C	Intracellular trafficking, secretion, and vesicular transport	vesicle-associated membrane protein	G131S, A170T,	--
ENSGALG00000005269	ENSGALT00000008456	INTS2	Function unknown	integrator complex subunit 2	T639A,	--
ENSGALG00000005280	ENSGALT00000008467	DBT	Energy production and conversion	dihydrolipoamide branched chain transacylase E2	S43P, H49P,	--
ENSGALG00000005284	ENSGALT00000008474	LRRC39	Function unknown	Leucine rich repeat containing 39	K42R, T316A,	--
ENSGALG00000005290	ENSGALT00000008481	TRMT13	Function unknown	tRNA methyltransferase 13 homolog (S. cerevisiae)	E346D,	--
ENSGALG00000005292	ENSGALT00000008484	KLHL40	General function prediction only	Kelch repeat and BTB (POZ) domain containing	G205S,	--
ENSGALG00000005297	ENSGALT00000008494	HHATL	Cell wall/membrane/envelope biogenesis	Membrane bOund o-acyl transferase mboat family protein	V249A,	--
ENSGALG00000005299	ENSGALT00000008499	ANXA7	Function unknown	annexin A7	M135I, Q151R, N268S, I282L, G300V, I420V,	--
ENSGALG00000005302	ENSGALT00000008503	SASS6	Intracellular trafficking, secretion, and vesicular transport	spindle assembly 6 homolog (C. elegans)	T180S, S191A, E372D, T376A, S591P,	--
ENSGALG00000005309	ENSGALT00000008512	TKT	Carbohydrate transport and metabolism	Transketolase	S84A, N442T,	--
ENSGALG00000005327	ENSGALT00000008547	RBP2	General function prediction only	Retinol binding protein 2, cellular	E119V,	--
ENSGALG00000005347	ENSGALT00000008573	ADAMTS18	Posttranslational modification, protein turnover, chaperones	ADAM metallopeptidase with thrombospondin type 1 motif	S86T,	--
ENSGALG00000005350	ENSGALT00000008580		Posttranslational modification, protein turnover, chaperones	ubiquitin carboxyl-terminal hydrolase	K307R, L480F, V925G, F1320L, K1344R,	--
ENSGALG00000005357	ENSGALT00000008592	COPB2	Intracellular trafficking, secretion, and vesicular transport	coatomer protein complex, subunit beta 2 (beta prime)	H467Q,	--
ENSGALG00000005365	ENSGALT00000008614	NARFL	Energy production and conversion	hydrogenase	N159S,	--
ENSGALG00000005377	ENSGALT00000008632		Posttranslational modification, protein turnover, chaperones	e3 ubiquitin protein ligase	I128V, V258L, Y328F,	--
ENSGALG00000005385	ENSGALT00000008651	ACTR8	Cytoskeleton	actin-related protein	S410A,	--
ENSGALG00000005397	ENSGALT00000008665	GGNBP2	General function prediction only	gametogenetin binding protein 2	N48S, A404G, N426S, G445S, R575C, T620A,	--
ENSGALG00000005408	ENSGALT00000008685	BCMO1	Secondary metabolites biosynthesis, transport and catabolism	Beta-carotene	P517R,	--
ENSGALG00000005418	ENSGALT00000008702	FRRS1	Intracellular trafficking, secretion, and vesicular transport	Ferric-chelate reductase 1	V20M, P89S, R99Q, Y129N, P173L, L174P, D213N, T356I, S403R, K568N, T573A,	--
ENSGALG00000005442	ENSGALT00000008738	PALMD	Function unknown	Palmdelphin	K180R, H519N,	--
ENSGALG00000005450	ENSGALT00000008746	CCDC66	Function unknown	Coiled-coil domain containing 66	E198K, T265N, I617V, K632N, Q635H, E646G, K673R, R872G,	--
ENSGALG00000005451	ENSGALT00000008749	HELLS	Transcription	Helicase, lymphoid-specific	E275K,	--
ENSGALG00000005505	ENSGALT00000008754	PIK3CB	Chromatin structure and dynamics ,Cell cycle control, cell division, chromosome partitioning ,Replication, recombination and repair ,Signal transduction mechanisms ,Intracellular trafficking, secretion, and vesicular transport ,	3-kinase, catalytic subunit	A144S, V678I,	--
ENSGALG00000005456	ENSGALT00000008756	SDR42E1	Cell wall/membrane/envelope biogenesis	Nad-dependent epimerase dehydratase	E65Q, F287L,	--
ENSGALG00000005460	ENSGALT00000008764	SLCO4A1	Inorganic ion transport and metabolism	Solute carrier organic anion transporter family, member	A308V, T669A,	--
ENSGALG00000005473	ENSGALT00000008793	PNAT3	Secondary metabolites biosynthesis, transport and catabolism	N-acetyltransferase	Y56F, S118P, I138T, T146I,	--
ENSGALG00000005483	ENSGALT00000008808	CDH13	Function unknown	Cadherin 13, H-cadherin	E214Q, V229E, K609Q,	--
ENSGALG00000005493	ENSGALT00000008819	ITGB1BP2	General function prediction only	cysteine and histidine-rich domain (CHORD) containing 1	R151K,	--
ENSGALG00000005499	ENSGALT00000008827	IL17RD	Intracellular trafficking, secretion, and vesicular transport	Interleukin 17 receptor D	I621V,	--
ENSGALG00000005506	ENSGALT00000008837	HESX1	Transcription	HESX homeobox 1	E93D,	--
ENSGALG00000005509	ENSGALT00000008842	DPYD	Nucleotide transport and metabolism	Catalyzes the conversion of dihydroorotate to orotate	S509C, P598H, Q725H, K745R,	K745R, S509C,
ENSGALG00000005516	ENSGALT00000008849	HEATR6	Function unknown	HEAT repeat containing 6	K289R, F322L, L346P, V448L, E1026A, L1114V, I1125M, K1138T, R1142G,	--
ENSGALG00000005535	ENSGALT00000008880	TCOF1	General function prediction only	Treacher Collins-Franceschetti syndrome 1	K158T, T330A, E342D,	--
ENSGALG00000005547	ENSGALT00000008896	PIK3AP1	Posttranslational modification, protein turnover, chaperones	Phosphoinositide-3-kinase adaptor protein 1	Q77H, Q86R, K311R, S497G, V748F,	--
ENSGALG00000005558	ENSGALT00000008918	TBL3	General function prediction only	transducin beta-like 3	V278A, T647S,	--
ENSGALG00000005580	ENSGALT00000008955	TMEM56	Intracellular trafficking, secretion, and vesicular transport	Transmembrane protein 56	I11L, A12T, L21F,	--
ENSGALG00000005584	ENSGALT00000008962	GALNT18	Posttranslational modification, protein turnover, chaperones	UDP-N-acetyl-alpha-D-galactosamine polypeptide	S550N,	--
ENSGALG00000005594	ENSGALT00000008974	OMG	General function prediction only	Oligodendrocyte myelin glycoprotein	T365A,	--
ENSGALG00000005598	ENSGALT00000008981	ZNF598	General function prediction only	Zinc finger protein	I148V, S218R, A435P, V570T, I704V, K752E,	--
ENSGALG00000005599	ENSGALT00000008982		Function unknown	UDP-glucoronosyl and UDP-glucosyl transferase	R333S,	--
ENSGALG00000005610	ENSGALT00000009004	SLC44A3	Inorganic ion transport and metabolism	Solute carrier family 44 member	K28Q, L154I, T246I, V457A, T500A, M603V,	--
ENSGALG00000005617	ENSGALT00000009013	NTHL1	Replication, recombination and repair	endonuclease III	L251F, R280K,	--
ENSGALG00000005630	ENSGALT00000009031	CRYBB1	General function prediction only	crystallin, beta B1	D135E,	--
ENSGALG00000005631	ENSGALT00000009035	TRPM2	Inorganic ion transport and metabolism	transient receptor potential cation channel subfamily m member	Q89R, E405N, R642H, G1083S, Q1143K,	--
ENSGALG00000005637	ENSGALT00000009044	GBF1	General function prediction only	and SEC7 domain	P617Q, V643I, S1315G, P1762S,	--
ENSGALG00000005646	ENSGALT00000009056	TSC2	Function unknown	Tuberous sclerosis 2	I591V, E1323K, A1516T,	--
ENSGALG00000005647	ENSGALT00000009059	ABCD3	General function prediction only	(ABC) transporter	E51Q, K74R, K442R, V455I,	--
ENSGALG00000005668	ENSGALT00000009090	WSB1	General function prediction only	WD repeat and SOCS box containing 1	L72S, Y281C, Y344H, E415G,	--
ENSGALG00000005672	ENSGALT00000009094	SLC6A7	Inorganic ion transport and metabolism	Transporter	W561L,	--
ENSGALG00000005687	ENSGALT00000009122	CUEDC2	General function prediction only	CUE domain containing 2	I71V,	--
ENSGALG00000005696	ENSGALT00000009138	ABHD6	General function prediction only	abhydrolase domain containing 6	D182E,	--
ENSGALG00000005699	ENSGALT00000009143	NLK	Signal transduction mechanisms	Nemo-Like kinase	I215M,	I215M,
ENSGALG00000005714	ENSGALT00000009168	PKD1	Function unknown	polycystic kidney disease 1 (autosomal dominant)	R1162H, S1616F, E1800Q, S2752T, S3551L,	--
ENSGALG00000005802	ENSGALT00000009188	FLT4	Signal transduction mechanisms	fms-related tyrosine kinase 1 (vascular endothelial growth factor vascular permeability factor receptor)	V214M, H308Q,	V214M,
ENSGALG00000013929	ENSGALT00000009189	PDGFRA	Signal transduction mechanisms	Growth factor receptor	C13Y, M192V, P323S, M474V,	--
ENSGALG00000005725	ENSGALT00000009190	CSF1R	Signal transduction mechanisms	colony stimulating factor 1 receptor	H338Y, E374D, D438G,	--
ENSGALG00000005757	ENSGALT00000009243	IRF8	Transcription	interferon regulatory factor 8	D137E, P393T,	--
ENSGALG00000005767	ENSGALT00000009263	TRAF7	Signal transduction mechanisms	TNF receptor-associated factor 7, E3 ubiquitin protein ligase	I462M,	--
ENSGALG00000005775	ENSGALT00000009276	TEX11	Function unknown	testis expressed 11	Q59R, K96R, C141R, Q178E, Y222H, A265T, V383A, N685G, S782G,	--
ENSGALG00000005782	ENSGALT00000009287	GCLM	General function prediction only	reductase	V72I, S112A, K235R,	--
ENSGALG00000005789	ENSGALT00000009300	UQCRC1	Posttranslational modification, protein turnover, chaperones	peptidase'	T127S, K171E, I309F,	--
ENSGALG00000005796	ENSGALT00000009310	XBP1	Transcription	X-box binding protein 1	P240C,	--
ENSGALG00000005803	ENSGALT00000009318		General function prediction only	zinc and ring finger 3	G577V,	--
ENSGALG00000005808	ENSGALT00000009327	KREMEN1	Intracellular trafficking, secretion, and vesicular transport	kringle containing transmembrane protein 1	A346T,	--
ENSGALG00000005814	ENSGALT00000009335		Carbohydrate transport and metabolism	hydrolase, family 31	L31I,	--
ENSGALG00000005824	ENSGALT00000009356	SUSD2	General function prediction only	sushi domain containing 2	K387R, D474A, P494S, D573G, T628A,	--
ENSGALG00000005826	ENSGALT00000009358	DLEC1	Function unknown	Deleted in lung and esophageal cancer 1	S250Y, V277F, V314L, Q377K, K379R, R528Q, P568L, V683I, I706S, V787A, S975G, I1028V, P1221L, G1299A,	--
ENSGALG00000005852	ENSGALT00000009403	SRMS	Signal transduction mechanisms	Serine Threonine protein kinase	R17W, I36M,	--
ENSGALG00000005857	ENSGALT00000009416	ALOX5	General function prediction only	Arachidonate	M620V,	--
ENSGALG00000005885	ENSGALT00000009461	DGCR14	Function unknown	DiGeorge syndrome critical region gene 14	L93V, V450I,	--
ENSGALG00000005897	ENSGALT00000009490	HMCES	Function unknown	conserved protein	E263K,	--
ENSGALG00000005900	ENSGALT00000009493	E4F1	Transcription	E4F transcription factor 1	T294A,	--
ENSGALG00000005903	ENSGALT00000009496	NRIP3	Replication, recombination and repair	Nuclear receptor interacting protein 3	S136T, H222N,	--
ENSGALG00000005918	ENSGALT00000009517		Function unknown	family with sequence similarity 69, member	G125D,	--
ENSGALG00000005923	ENSGALT00000009526	NPY4R	Signal transduction mechanisms	Neuropeptide Y receptor	K17R,	--
ENSGALG00000005933	ENSGALT00000009548	SLC5A11	General function prediction only	solute carrier family 5 (sodium glucose cotransporter), member	N115K, V231I,	--
ENSGALG00000005936	ENSGALT00000009554	AGTR2	Intracellular trafficking, secretion, and vesicular transport	angiotensin II receptor, type 2	F213I, T276I,	--
ENSGALG00000005953	ENSGALT00000009572	RPAP2	Transcription	RNA polymerase II associated protein 2	Q249R, P274S, A315V,	--
ENSGALG00000005956	ENSGALT00000009577		Function unknown	annexin A7	I203V,	--
ENSGALG00000005957	ENSGALT00000009580	SLC6A14	Inorganic ion transport and metabolism	Transporter	I232V,	--
ENSGALG00000005959	ENSGALT00000009583	GLMN	Function unknown	Glomulin, FKBP associated protein	S76C, Q126L, D213G, I288M, D448N, T566A, V601G,	--
ENSGALG00000005972	ENSGALT00000009602	KBTBD12	General function prediction only	kelch repeat and BTB (POZ) domain containing 12	C149R,	--
ENSGALG00000005978	ENSGALT00000009614	RBP3	Function unknown	retinol binding protein 3, interstitial	K33E, T206S, S221G, G290R, T373A, A548V, L637I, T664N, T782A, V880I, I1001V, D1115N, T1178A, A1217V,	--
ENSGALG00000005979	ENSGALT00000009616	OXSR1	Signal transduction mechanisms	oxidative-stress responsive 1	S374A,	--
ENSGALG00000005981	ENSGALT00000009620	GDF2	Signal transduction mechanisms	Bone morphogenetic protein 10	E167K, N183K, I229T, N333D,	--
ENSGALG00000005992	ENSGALT00000009637	PDE8A	Signal transduction mechanisms	Phosphodiesterase	T82M,	--
ENSGALG00000005995	ENSGALT00000009642	SLC13A5	Inorganic ion transport and metabolism	Solute carrier family 13	T168A, A500V,	--
ENSGALG00000005999	ENSGALT00000009651	ABTB1	General function prediction only	Ankyrin Repeat	N281S,	--
ENSGALG00000006015	ENSGALT00000009679	COPB1	Intracellular trafficking, secretion, and vesicular transport	The coatomer is a cytosolic protein complex that binds to dilysine motifs and reversibly associates with Golgi non- clathrin-coated vesicles, which further mediate biosynthetic protein transport from the ER, via the Golgi up to the trans Golgi network. Coatomer complex is required for budding from Golgi membranes, and is essential for the retrograde Golgi-to-ER transport of dilysine-tagged protei…	D108V,	--
ENSGALG00000006027	ENSGALT00000009702	TM6SF1	Function unknown	Transmembrane 6 superfamily member	I300V,	--
ENSGALG00000006033	ENSGALT00000009713	GORASP1	Intracellular trafficking, secretion, and vesicular transport	Golgi reassembly stacking protein	E169A, S249P,	--
ENSGALG00000006047	ENSGALT00000009740	TPRA1	Function unknown	transmembrane protein, adipocyte asscociated 1	T28A,	--
ENSGALG00000006050	ENSGALT00000009745	CYP2R1	Secondary metabolites biosynthesis, transport and catabolism	Cytochrome p450	Q416H, M494T,	--
ENSGALG00000006051	ENSGALT00000009749	CDC7	Cell cycle control, cell division, chromosome partitioning	cell division cycle 7 homolog (S. cerevisiae)	Q279H, T294A, Q296R, L303V, I310T, T319M, G340V, R430Q, E510K,	--
ENSGALG00000006053	ENSGALT00000009757		Carbohydrate transport and metabolism	Solute carrier family 2 (Facilitated glucose transporter) member	I106V, M125V,	--
ENSGALG00000006064	ENSGALT00000009782	TEKT1	Function unknown	Tektin 1	D78N, A263R, I385V,	--
ENSGALG00000006083	ENSGALT00000009815		Function unknown	K07611 lamin B	Q351R, H426Q, D461E,	--
ENSGALG00000006098	ENSGALT00000009843	HPRT1	Nucleotide transport and metabolism	hypoxanthine phosphoribosyltransferase	N203K,	--
ENSGALG00000006110	ENSGALT00000009864	PLK1	Cell cycle control, cell division, chromosome partitioning	Polo-like kinase	N437S,	--
ENSGALG00000006122	ENSGALT00000009880	EARS2	Translation, ribosomal structure and biogenesis	Catalyzes the attachment of glutamate to tRNA(Glu) in a two-step reaction glutamate is first activated by ATP to form Glu-AMP and then transferred to the acceptor end of tRNA(Glu) (By similarity)	P151H, L273M,	--
ENSGALG00000006123	ENSGALT00000009881		Replication, recombination and repair	helicase	Q292R, T409A, Y420C, I425V, E783G, T877A, K957E, S1089G,	--
ENSGALG00000006127	ENSGALT00000009889	FAM122A	Function unknown	family with sequence similarity	S125A, S160C, C232W, L273V,	--
ENSGALG00000006131	ENSGALT00000009894	FTCD	Amino acid transport and metabolism	Glutamate formiminotransferase	Q113H,	--
ENSGALG00000006141	ENSGALT00000009916	POFUT2	Posttranslational modification, protein turnover, chaperones	O-fucosyltransferase 2	T205I,	--
ENSGALG00000006153	ENSGALT00000009936	EXOG	Nucleotide transport and metabolism	DNA RNA NON-specific endonuclease	A137V, T258P, I306V,	--
ENSGALG00000006156	ENSGALT00000009940	COG7	Intracellular trafficking, secretion, and vesicular transport	Component of oligomeric Golgi complex 7	S241N, G605S,	--
ENSGALG00000006182	ENSGALT00000009978	NSFL1C	Nuclear structure	NSFL1 (P97) cofactor (P47)	V325A,	--
ENSGALG00000006190	ENSGALT00000009988	FHL1	General function prediction only	four and A half lim domains	Y166F,	--
ENSGALG00000006194	ENSGALT00000009996	SLC52A3	Inorganic ion transport and metabolism	solute carrier family 52, riboflavin transporter, member 3	V74I, P264S,	--
ENSGALG00000006211	ENSGALT00000010073	BCL2L1	Signal transduction mechanisms	bcl2-like 1	E75Q,	--
ENSGALG00000006233	ENSGALT00000010074		General function prediction only	polypeptide N-acetylgalactosaminyltransferase	K199Q, K442R, Q481R,	--
ENSGALG00000006236	ENSGALT00000010084	TPH1	Amino acid transport and metabolism	Phenylalanine 4-monooxygenase	T226S,	--
ENSGALG00000006267	ENSGALT00000010129	TPX2	Cytoskeleton	TPX2, microtubule-associated, homolog (Xenopus laevis)	E43G, V378A, K510R,	--
ENSGALG00000006283	ENSGALT00000010150	THAP4	Function unknown	THAP domain containing 4	E233G, A254G,	--
ENSGALG00000006298	ENSGALT00000010179	ATG4B	Posttranslational modification, protein turnover, chaperones	cysteine	C293S,	--
ENSGALG00000006307	ENSGALT00000010199	NSMCE1	Replication, recombination and repair	non-SMC element 1 homolog (S. cerevisiae)	V210I,	--
ENSGALG00000006323	ENSGALT00000010224	LECT2	Posttranslational modification, protein turnover, chaperones	Leukocyte cell-derived chemotaxin 2	I73V, K199R, L267V,	--
ENSGALG00000006342	ENSGALT00000010251	UEVLD	Energy production and conversion	Catalyzes the reversible oxidation of malate to oxaloacetate (By similarity)	H118Q, G175D, D193E, K240R, L438F,	--
ENSGALG00000006345	ENSGALT00000010255		Function unknown	Transmembrane protein 43	I17V, E31D, I110V, V355M, S383A, I387V,	--
ENSGALG00000006354	ENSGALT00000010271	GAL3ST2	Function unknown	Galactose-3-O-sulfotransferase	S42N, L73F, K336R, N365D, K373R,	--
ENSGALG00000006357	ENSGALT00000010275	XPC	Replication, recombination and repair	dna repair protein	T333M, S356T, T358A, E410K, S419G, P615A,	--
ENSGALG00000006362	ENSGALT00000010283	HTR5A	Intracellular trafficking, secretion, and vesicular transport	5-hydroxytryptamine (serotonin) receptor 5A, G protein-coupled	V50M, V85M,	--
ENSGALG00000006363	ENSGALT00000010286	CABIN1	General function prediction only	Calcineurin binding protein 1	G236A, V788I,	--
ENSGALG00000006368	ENSGALT00000010293	PTPN5	Signal transduction mechanisms	protein tyrosine phosphatase	S319T,	--
ENSGALG00000006371	ENSGALT00000010296	C5orf24	Function unknown	Chromosome 5 open reading frame 24	N15T,	--
ENSGALG00000006401	ENSGALT00000010333	OSBPL5	Signal transduction mechanisms	oxysterol binding protein-like	R745G,	--
ENSGALG00000006410	ENSGALT00000010348		General function prediction only	factor 1	E59D, E413G,	--
ENSGALG00000006413	ENSGALT00000010352	CEMIP	Function unknown	polycystic kidney and hepatic disease 1 (autosomal recessive)-like 1	M336T, N918K, D946G, F1315S,	--
ENSGALG00000006417	ENSGALT00000010356	SEC24A	Intracellular trafficking, secretion, and vesicular transport	SEC24 family, member	S34P, V44A, S62P, M317V, T837A,	--
ENSGALG00000006418	ENSGALT00000010359	PDPK1	Signal transduction mechanisms	3phosphoinositidedependent protein kinase	N378K,	--
ENSGALG00000006425	ENSGALT00000010371	SLC6A6	Inorganic ion transport and metabolism	Transporter	V517M,	--
ENSGALG00000006427	ENSGALT00000010376	CARS	Translation, ribosomal structure and biogenesis	Cysteinyl-tRNA synthetase	Q43E, K254R, A426G, N579K,	--
ENSGALG00000006434	ENSGALT00000010385	TSR3	Function unknown	pre-rRNA processing protein involved in ribosome biogenesis (By similarity)	L149P, D279G,	--
ENSGALG00000006437	ENSGALT00000010388		Signal transduction mechanisms	nucleolar protein with MIF4G domain 1	E480G,	--
ENSGALG00000006440	ENSGALT00000010393		Function unknown	Galactose-3-O-sulfotransferase	I40V,	--
ENSGALG00000006446	ENSGALT00000010401	NAP1L4	Chromatin structure and dynamics ,Cell cycle control, cell division, chromosome partitioning ,	nucleosome assembly protein 1-like	T12P,	--
ENSGALG00000021017	ENSGALT00000010407	DUSP15	Signal transduction mechanisms	Dual specificity protein phosphatase	S141A,	--
ENSGALG00000006465	ENSGALT00000010440	CCDC51	Function unknown	Coiled-coil domain containing 51	C39S, I113V, I215V, L347V,	--
ENSGALG00000006471	ENSGALT00000010452	SLCO2A1	Secondary metabolites biosynthesis, transport and catabolism	Solute carrier organic anion transporter family, member	V148A, M288T,	--
ENSGALG00000006482	ENSGALT00000010479	FAH	Secondary metabolites biosynthesis, transport and catabolism	Fumarylacetoacetate hydrolase	L153W,	--
ENSGALG00000006491	ENSGALT00000010491	ANKRD1	General function prediction only	Ankyrin Repeat	G21S, K208E, L218V,	--
ENSGALG00000006502	ENSGALT00000010507	PCGF5	Posttranslational modification, protein turnover, chaperones	Polycomb group ring finger	P112S, D124E,	--
ENSGALG00000006519	ENSGALT00000010531	KIAA1024	Function unknown	kiaa1024	G147A, L491F, T852A,	--
ENSGALG00000006520	ENSGALT00000010534	MYH11	Cytoskeleton	myosin heavy chain	D139E, I427V, I474V, D1229E, K1625R,	--
ENSGALG00000006522	ENSGALT00000010538	HCK	Signal transduction mechanisms	Serine Threonine protein kinase	Q186P, R435G,	--
ENSGALG00000006530	ENSGALT00000010554	TSSC4	Intracellular trafficking, secretion, and vesicular transport	tumor suppressing subtransferable candidate 4	V30A, D208G,	--
ENSGALG00000006540	ENSGALT00000010564		Signal transduction mechanisms	dopamine receptor	V166A,	--
ENSGALG00000006563	ENSGALT00000010596	SEMA3D	Signal transduction mechanisms	sema domain, immunoglobulin domain (Ig), short basic domain, secreted, (semaphorin) 3D	P96S,	--
ENSGALG00000006564	ENSGALT00000010597		Posttranslational modification, protein turnover, chaperones	ATP binding to DnaK triggers the release of the substrate protein, thus completing the reaction cycle. Several rounds of ATP-dependent interactions between DnaJ, DnaK and GrpE are required for fully efficient folding. Also involved, together with DnaK and GrpE, in the DNA replication of plasmids through activation of initiation proteins (By similarity)	H108Q, E329D,	--
ENSGALG00000006566	ENSGALT00000010599	TBCCD1	Function unknown	TBCC domain containing 1	P252S, R457H,	--
ENSGALG00000006568	ENSGALT00000010607	TM9SF4	Function unknown	transmembrane 9 superfamily	E284V,	--
ENSGALG00000006575	ENSGALT00000010623	VIPR2	Intracellular trafficking, secretion, and vesicular transport	Vasoactive intestinal peptide receptor 2	Y51N, S109T, M432V,	--
ENSGALG00000006602	ENSGALT00000010657	SYT8	Signal transduction mechanisms ,Intracellular trafficking, secretion, and vesicular transport ,	synaptotagmin VIII	A48V, L91Q, K129R, V296M,	--
ENSGALG00000006617	ENSGALT00000010681	BCCIP	Intracellular trafficking, secretion, and vesicular transport	Involved in nuclear export, actin cytoskeleton organization and vesicular transport (By similarity)	T163S, K299R,	--
ENSGALG00000006626	ENSGALT00000010702	PDE6C	Cytoskeleton	Phosphodiesterase 6C, cGMP-specific, cone, alpha prime	T185I, R225K,	--
ENSGALG00000006627	ENSGALT00000010703	UPB1	General function prediction only	nitrilase cyanide hydratase and apolipoprotein n-acyltransferase	T121A, L153V, V201I, E291V,	L153V, E291V,
ENSGALG00000006632	ENSGALT00000010715	CEP63	Cytoskeleton	Centrosomal protein 63kDa	R85W, D274E, M277L,	--
ENSGALG00000006637	ENSGALT00000010722		Function unknown	XK, Kell blood group complex subunit-related, X-linked	S140T, R142H, K210T, R277Q, A345V, L383I,	--
ENSGALG00000006645	ENSGALT00000010738		General function prediction only	lipase, member	M414L,	--
ENSGALG00000006657	ENSGALT00000010768	MAPRE1	Cytoskeleton	microtubule-associated protein RP EB family member	T168S,	--
ENSGALG00000006658	ENSGALT00000010770	FANCI	Function unknown	Fanconi anemia, complementation group I	I90V, S131A, A136T, Q359R, E627G, Y680C, D692E, L800S, K880R, I918T, F1224L, V1240I, N1306S,	--
ENSGALG00000006670	ENSGALT00000010788	PPP1R3C	Signal transduction mechanisms	Protein phosphatase 1, regulatory subunit	N49S, I269M, D278N, Q305R,	--
ENSGALG00000006677	ENSGALT00000010797	P4HA2	Amino acid transport and metabolism	prolyl 4-hydroxylase	S275N,	--
ENSGALG00000006682	ENSGALT00000010805	BEND7	General function prediction only	BEN domain containing 7	R98H,	--
ENSGALG00000006689	ENSGALT00000010812	ABHD2	General function prediction only	Abhydrolase domain containing 2	N402D,	--
ENSGALG00000006702	ENSGALT00000010834	MFGE8	General function prediction only	Milk fat globule-EGF factor 8 protein	T91S, I286L,	--
ENSGALG00000006704	ENSGALT00000010839	VPS8	Intracellular trafficking, secretion, and vesicular transport	vacuolar protein sorting 8 homolog (S. cerevisiae)	S110A, I758M, E888G, R1076Q, R1144H,	--
ENSGALG00000006710	ENSGALT00000010853	RAB36	General function prediction only	member RAS oncogene family	H36N, I95M, I165V,	--
ENSGALG00000006715	ENSGALT00000010862	OAF	Function unknown	OAF homolog (Drosophila)	R123K,	--
ENSGALG00000006717	ENSGALT00000010866		Function unknown	oligomeric mucus gel-forming	Y674S, G777S, C796W, S988Y, S1171N, K1198Q, T1397A, H1506Y, T1532A,	--
ENSGALG00000006738	ENSGALT00000010897	CDK5RAP1	Translation, ribosomal structure and biogenesis	Catalyzes the methylthiolation of N6- (dimethylallyl)adenosine (i(6)A), leading to the formation of 2- methylthio-N6-(dimethylallyl)adenosine (ms(2)i(6)A) at position 37 in tRNAs that read codons beginning with uridine (By similarity)	T469S,	--
ENSGALG00000029077	ENSGALT00000010949	CBL	Defense mechanisms	Cbl proto-oncogene, E3 ubiquitin protein ligase	E674D,	--
ENSGALG00000006782	ENSGALT00000010970	MRPL46	Translation, ribosomal structure and biogenesis	mitochondrial ribosomal protein, L46	N157D, T263A,	--
ENSGALG00000006796	ENSGALT00000010991	SRPX2	General function prediction only	Sushi-repeat containing protein, X-linked 2	H70Y, P154A,	--
ENSGALG00000006817	ENSGALT00000011020	CTNNBL1	General function prediction only	Catenin, beta like 1	S207G,	--
ENSGALG00000006819	ENSGALT00000011024		Amino acid transport and metabolism	ATP GTP binding	N141S, N206S, L232R, I256L, N289D, V397M, N401S, E441G, R443T, M676L,	--
ENSGALG00000006826	ENSGALT00000011035	KLHL25	Function unknown	kelch-like 25 (Drosophila)	T473M,	--
ENSGALG00000006833	ENSGALT00000011058	ITIH2	General function prediction only	von Willebrand factor, type A	L162M, V680T,	--
ENSGALG00000006834	ENSGALT00000011059	CPB1	General function prediction only	Carboxypeptidase	A3T, L5I, V79A, Y356D,	--
ENSGALG00000006838	ENSGALT00000011065		Function unknown		N107S, P144L, K283R, K299Q, E333D, A519V, I637V, Q691R,	--
ENSGALG00000006877	ENSGALT00000011141	KLHL4	Function unknown	Kelch-like 5 (Drosophila)	E271D,	--
ENSGALG00000006891	ENSGALT00000011162	ITIH5	General function prediction only	von Willebrand factor, type A	V572I,	--
ENSGALG00000006898	ENSGALT00000011172	EIF4ENIF1	Translation, ribosomal structure and biogenesis	Eukaryotic translation initiation factor 4E nuclear import factor 1	M818I,	--
ENSGALG00000006942	ENSGALT00000011250	PIK3IP1	Intracellular trafficking, secretion, and vesicular transport	Phosphoinositide-3-kinase interacting protein 1	S51G,	--
ENSGALG00000006944	ENSGALT00000011252		Signal transduction mechanisms	FRI	E266D,	--
ENSGALG00000006947	ENSGALT00000011255	BDH1	General function prediction only	dehydrogenase	K5R, F35L,	--
ENSGALG00000006960	ENSGALT00000011276	RNF185	Posttranslational modification, protein turnover, chaperones	Ring finger protein	C61W,	C61W,
ENSGALG00000006964	ENSGALT00000011282	SDR42E2	Cell wall/membrane/envelope biogenesis	Nad-dependent epimerase dehydratase	V111A,	--
ENSGALG00000007030	ENSGALT00000011375		Function unknown	transmembrane protein 180-like	I60V, L370F,	L370F,
ENSGALG00000007036	ENSGALT00000011386	PITRM1	Posttranslational modification, protein turnover, chaperones	pitrilysin metallopeptidase 1	T332S, V592I,	--
ENSGALG00000007040	ENSGALT00000011404	ACAP2	Signal transduction mechanisms	ArfGAP with coiled-coil, ankyrin repeat and PH domains	V531A,	--
ENSGALG00000007042	ENSGALT00000011408		Function unknown	coiled-coil domain containing 40	N221D, L231I, E284Q, L427F, A449V, I493V, Y591S,	--
ENSGALG00000007047	ENSGALT00000011418	GAL	Intracellular trafficking, secretion, and vesicular transport	Galanin	V87M,	--
ENSGALG00000007072	ENSGALT00000011455	ACADS	Lipid transport and metabolism	acyl-CoA dehydrogenase	S103C,	--
ENSGALG00000007079	ENSGALT00000011469	PAPPA	Posttranslational modification, protein turnover, chaperones	pregnancy-associated plasma protein A, pappalysin 1	L11R, P49Q, V378I, I613T, L622P, S625G,	--
ENSGALG00000007097	ENSGALT00000011490	RPS6KA6	Signal transduction mechanisms	ribosomal protein S6 kinase, 90kDa, polypeptide 6	I445V,	--
ENSGALG00000007112	ENSGALT00000011519	LINS1	Function unknown	lines homolog (Drosophila)	L5V, V280I, K420R, I493V, H535R, V554I, N575S, M713T, L721W,	--
ENSGALG00000007119	ENSGALT00000011534	DAGLB	Lipid transport and metabolism	diacylglycerol lipase	I110V, I150V, V443A, K526Q, N577S,	--
ENSGALG00000007127	ENSGALT00000011547		Lipid transport and metabolism	Fatty acid desaturase	L297M, V350M,	--
ENSGALG00000007132	ENSGALT00000011555	ACOX2	Lipid transport and metabolism	acyl-CoA dehydrogenase	S302A, Y603F,	--
ENSGALG00000007141	ENSGALT00000011565	LRRK1	General function prediction only	GTP-binding Protein	N339S,	--
ENSGALG00000007158	ENSGALT00000011595	SOCS1	Posttranslational modification, protein turnover, chaperones	suppressor of cytokine signaling	L151V,	--
ENSGALG00000007169	ENSGALT00000011610	EPC1	Transcription	enhancer of polycomb homolog	N731S,	--
ENSGALG00000007178	ENSGALT00000011621	FADS2	Lipid transport and metabolism	Fatty acid desaturase	S357T,	--
ENSGALG00000007181	ENSGALT00000011630	PGS1	Lipid transport and metabolism	Phosphatidylglycerophosphate synthase 1	K170R, N196H,	--
ENSGALG00000007203	ENSGALT00000011657	RAB3IL1	General function prediction only	RAB3A interacting protein	L352P,	--
ENSGALG00000007215	ENSGALT00000011680	KIF5B	Cytoskeleton	Kinesin family member	N370K, I407M, T769R,	--
ENSGALG00000007222	ENSGALT00000011689	UTS2B	General function prediction only	Urotensin 2 domain containing	Q5H, M16V, S22P,	--
ENSGALG00000007246	ENSGALT00000011725	ELMO2	General function prediction only	Engulfment and cell motility	S91G,	--
ENSGALG00000007252	ENSGALT00000011736	ANKDD1A	General function prediction only	Ankyrin Repeat	V101I, I127V, D149G, F153L, I320M, I335T, H359Q,	--
ENSGALG00000007253	ENSGALT00000011741	IL1RAP	Intracellular trafficking, secretion, and vesicular transport	interleukin 1 receptor accessory protein	V221I,	--
ENSGALG00000007276	ENSGALT00000011789	GCN1	Intracellular trafficking, secretion, and vesicular transport	GCN1 general control of amino-acid synthesis 1-like 1 (Yeast)	I509V, H564Q, E649D, I882V, N933S, Q1243E, K2232R, I2507V,	--
ENSGALG00000007278	ENSGALT00000011793	GRIN2A	Intracellular trafficking, secretion, and vesicular transport	glutamate receptor, ionotropic, n-methyl d-aspartate	Q958H, I1135V, D1145E,	--
ENSGALG00000007289	ENSGALT00000011804	CLPX	Posttranslational modification, protein turnover, chaperones	ClpX caseinolytic peptidase X homolog (E. coli)	K39R, N55S, S90A, N278S,	--
ENSGALG00000007311	ENSGALT00000011832	CLDN2	Intracellular trafficking, secretion, and vesicular transport	Claudin 2	A200S,	--
ENSGALG00000007346	ENSGALT00000011883	KIAA1462	Function unknown	kiaa1462	N258S, L480P, S940L, E1006K, G1031A, P1114L, V1180A,	--
ENSGALG00000007351	ENSGALT00000011888	MTPAP	Replication, recombination and repair	domain) containing	T59A, M261V, T367A, Y441F,	--
ENSGALG00000007353	ENSGALT00000011893	MTFMT	Translation, ribosomal structure and biogenesis	Modifies the free amino group of the aminoacyl moiety of methionyl-tRNA(fMet). The formyl group appears to play a dual role in the initiator identity of N-formylmethionyl-tRNA by (I) promoting its recognition by IF2 and (II) impairing its binding to EFTu-GTP (By similarity)	E113K, K216T, K229E,	--
ENSGALG00000007357	ENSGALT00000011898	BCL6	General function prediction only	B-cell CLL lymphoma 6	N100S,	--
ENSGALG00000007358	ENSGALT00000011900	CILP	Posttranslational modification, protein turnover, chaperones	cartilage intermediate layer protein, nucleotide pyrophosphohydrolase	K84Q, K207R, E220A, T511S, V574I, L694M, S705T, T1032S,	--
ENSGALG00000007364	ENSGALT00000011909	TOB1	General function prediction only	transducer of ERBB2	N259T,	--
ENSGALG00000007373	ENSGALT00000011925	PRKAB1	Signal transduction mechanisms	Protein kinase, AMP-activated, beta 1 non-catalytic subunit	C176S,	--
ENSGALG00000007395	ENSGALT00000011965	ABCC2	Defense mechanisms	(ABC) transporter	M220I, A245T, D446E, L463V, V466I, I500V, T918A, R974Q, S1176P, M1195L,	--
ENSGALG00000007409	ENSGALT00000011985	SCN4B	Intracellular trafficking, secretion, and vesicular transport	sodium channel, voltage-gated, type IV, beta subunit	L157V,	--
ENSGALG00000007426	ENSGALT00000012017	MKX	Transcription	mohawk homeobox	T198A, A290T,	--
ENSGALG00000007435	ENSGALT00000012033	RAB18	General function prediction only	Ras-related protein	K190R,	--
ENSGALG00000007437	ENSGALT00000012036	DPP8	Amino acid transport and metabolism	peptidase s9 prolyl oligopeptidase active site domain protein	V349A,	--
ENSGALG00000007447	ENSGALT00000012048	TUBB1	Cytoskeleton	Tubulin is the major constituent of microtubules. It binds two moles of GTP, one at an exchangeable site on the beta chain and one at a non-exchangeable site on the alpha chain (By similarity)	E439G,	--
ENSGALG00000007474	ENSGALT00000012083	PCYT1A	Lipid transport and metabolism ,Cell wall/membrane/envelope biogenesis ,	cytidylyltransferase	S19P,	--
ENSGALG00000007494	ENSGALT00000012114	LARS	Translation, ribosomal structure and biogenesis	Leucyl-trna synthetase	K43E, K130R, D323E, I507V, I1168L,	--
ENSGALG00000007495	ENSGALT00000012116	SLC24A1	Inorganic ion transport and metabolism	Solute carrier family 24 (Sodium potassium calcium exchanger), member	P33S, E303Q,	--
ENSGALG00000007503	ENSGALT00000012129	KMO	Energy production and conversion ,Coenzyme transport and metabolism ,	Monooxygenase	F48S, Q258K, P468L,	--
ENSGALG00000007511	ENSGALT00000012144	ITGB2	Intracellular trafficking, secretion, and vesicular transport	integrin, beta	T54I, K417R, T430S, K481R,	--
ENSGALG00000007519	ENSGALT00000012158	ACBD5	Function unknown	acyl-CoA-binding domain-containing protein	S135A, K176R, L218F,	--
ENSGALG00000007526	ENSGALT00000012173		Function unknown	ES1 protein homolog, mitochondrial-like	V121A,	--
ENSGALG00000007536	ENSGALT00000012188		Replication, recombination and repair	deoxyribo-dipyrimidine photolyase	L222F, Y360C,	--
ENSGALG00000007549	ENSGALT00000012207	VAPB	Intracellular trafficking, secretion, and vesicular transport	VAMP (Vesicle-associated membrane protein)-associated protein	T144A,	--
ENSGALG00000007559	ENSGALT00000012224	PDSS1	Coenzyme transport and metabolism	synthase	T68A,	--
ENSGALG00000007579	ENSGALT00000012254	APBB1IP	Signal transduction mechanisms	amyloid beta (A4) precursor protein-binding, family B, member 1 interacting protein	N40D, R200Q, V426L, L431M, P443A,	--
ENSGALG00000007581	ENSGALT00000012259	FYTTD1	RNA processing and modification	Forty-two-three domain containing 1	N60D, I116V,	--
ENSGALG00000007582	ENSGALT00000012260	DPYSL3	Nucleotide transport and metabolism	Dihydroorotase	L181V,	--
ENSGALG00000007593	ENSGALT00000012278	JAKMIP2	Signal transduction mechanisms	janus kinase and microtubule interacting protein	L312Q,	--
ENSGALG00000007620	ENSGALT00000012325	GFRA3	Intracellular trafficking, secretion, and vesicular transport	GDNF family receptor alpha 3	D168E, A177V, P270S, S330G,	--
ENSGALG00000007636	ENSGALT00000012356	PCK1	Energy production and conversion	Catalyzes the conversion of oxaloacetate (OAA) to phosphoenolpyruvate (PEP), the rate-limiting step in the metabolic pathway that produces glucose from lactate and other precursors derived from the citric acid cycle (By similarity)	M617K,	--
ENSGALG00000007638	ENSGALT00000012358	HMOX2	Inorganic ion transport and metabolism	Heme oxygenase	L210M,	--
ENSGALG00000007642	ENSGALT00000012363		Amino acid transport and metabolism	Dehydrogenase	P375S,	--
ENSGALG00000007643	ENSGALT00000012364	DIS3L	Transcription	3'-5' exoribonuclease that releases 5'-nucleoside monophosphates and is involved in maturation of structured RNAs (By similarity)	D50E, I78V, N149K, S354P, I371V, D467E, E565D,	--
ENSGALG00000007652	ENSGALT00000012394	SUCLG2	Energy production and conversion	Succinyl-CoA synthetase subunit beta	S184N,	--
ENSGALG00000007667	ENSGALT00000012429	GPR158	Intracellular trafficking, secretion, and vesicular transport	G protein-coupled receptor 158	V762L, N1037S,	--
ENSGALG00000007668	ENSGALT00000012430	BMP7	Posttranslational modification, protein turnover, chaperones	bone morphogenetic protein	A353T,	--
ENSGALG00000007669	ENSGALT00000012431	EGR1	Transcription	early growth response	T148A, P154S,	--
ENSGALG00000007677	ENSGALT00000012445	THNSL1	Amino acid transport and metabolism	Catalyzes the specific phosphorylation of the 3-hydroxyl group of shikimic acid using ATP as a cosubstrate (By similarity)	K243E, Q333R, I430T, R611K,	--
ENSGALG00000007681	ENSGALT00000012451	HTR2B	Signal transduction mechanisms	5-hydroxytryptamine (serotonin) receptor 2B, G protein-coupled	K387N,	--
ENSGALG00000007697	ENSGALT00000012473	MGEA5	Function unknown	Meningioma expressed antigen 5 (Hyaluronidase)	A721V,	--
ENSGALG00000007702	ENSGALT00000012479	XYLT2	Function unknown	Xylosyltransferase	I238V, S541G, K569E, Y688F,	--
ENSGALG00000007709	ENSGALT00000012492	RTFDC1	Function unknown	replication termination factor 2 domain containing 1	K224E, S233T, S234A, I241V, K244R, T264A,	--
ENSGALG00000007721	ENSGALT00000012520	ARHGAP21	Signal transduction mechanisms	rho GTPase activating protein	P360A, A686T, K1519R, Y1536H, R1589K, F1605L,	--
ENSGALG00000007779	ENSGALT00000012620	ADCY9	Signal transduction mechanisms	Guanylate Cyclase	M843L,	--
ENSGALG00000007788	ENSGALT00000012629	ABCB7	Secondary metabolites biosynthesis, transport and catabolism	ATP-binding cassette, subfamily B (MDR TAP), member	V318I, Q329H,	--
ENSGALG00000007798	ENSGALT00000012646	SHQ1	Function unknown	SHQ1 homolog (S. cerevisiae)	N151S, V156L,	--
ENSGALG00000007803	ENSGALT00000012658		Carbohydrate transport and metabolism	Solute carrier family 2 (Facilitated glucose transporter) member	V248I, I330L, M393T, I450V,	V248I, I330L, M393T,
ENSGALG00000007808	ENSGALT00000012666	HID1	Function unknown	HID1 domain containing	I401V, I587L, S683C, G684A,	--
ENSGALG00000007817	ENSGALT00000012687	EHF	Transcription	ets homologous factor	T174A,	--
ENSGALG00000007825	ENSGALT00000012701	KIAA1841	Function unknown	kiaa1841	T398A,	--
ENSGALG00000007835	ENSGALT00000012717	PUS10	Translation, ribosomal structure and biogenesis	Responsible for synthesis of pseudouridine from uracil- 54 and uracil-55 in the psi GC loop of transfer RNAs (By similarity)	R75K, H78Y,	--
ENSGALG00000007862	ENSGALT00000012761	CNTN3	Posttranslational modification, protein turnover, chaperones	Contactin	T272M, A388V, T645A,	--
ENSGALG00000007864	ENSGALT00000012763	ARMC3	Intracellular trafficking, secretion, and vesicular transport	armadillo repeat containing 3	K296R, K311R, S471G, I622V, K710T, Q727R,	--
ENSGALG00000007868	ENSGALT00000012775	BCO2	Secondary metabolites biosynthesis, transport and catabolism	Beta-carotene	T122M,	--
ENSGALG00000007882	ENSGALT00000012801	C11orf57	Function unknown	chromosome 11 open reading frame 57	Q226R, E291G, E293D, R314K,	--
ENSGALG00000007902	ENSGALT00000012828	ATP7A	Inorganic ion transport and metabolism	p-type ATPase	N30D, S116A, T231A, L447I, P448R, M551I, E960D,	--
ENSGALG00000007904	ENSGALT00000012830	DLAT	Energy production and conversion	pyruvate dehydrogenase complex	I410V, I413V, D586E, V628A,	--
ENSGALG00000007914	ENSGALT00000012853	DNAJC1	Posttranslational modification, protein turnover, chaperones	DNAj domain protein	V253I, Y498H,	--
ENSGALG00000007927	ENSGALT00000012870	CNTN6	Signal transduction mechanisms	Cell adhesion molecule	A388G, T730A, K743Q,	--
ENSGALG00000007932	ENSGALT00000012888	TRAF6	Signal transduction mechanisms	TNF receptor-associated factor 6, E3 ubiquitin protein ligase	S245N, P287T,	--
ENSGALG00000007938	ENSGALT00000012896	RAG1	Chromatin structure and dynamics	Catalytic component of the RAG complex, a multiprotein complex that mediates the DNA cleavage phase during V(D)J recombination. V(D)J recombination assembles a diverse repertoire of immunoglobulin and T-cell receptor genes in developing B and T- lymphocytes through rearrangement of different V (variable), in some cases D (diversity), and J (joining) gene segments. In the RAG complex, RAG1 mediate…	Y17H, G82S, N83S, M94T, I253M, L689F,	--
ENSGALG00000007944	ENSGALT00000012904	HECW2	Posttranslational modification, protein turnover, chaperones	e3 ubiquitin protein ligase	G554V, G595V, E729D,	--
ENSGALG00000007956	ENSGALT00000012922	PLXDC2	General function prediction only	PleXin Domain containing	V337I, L396V, T413A, V462A,	--
ENSGALG00000007961	ENSGALT00000012930	ARMC7	Function unknown	armadillo repeat containing 7	T126I,	--
ENSGALG00000007965	ENSGALT00000012934	HN1	Posttranslational modification, protein turnover, chaperones	hematological and neurological expressed 1	P82S, N90T,	--
ENSGALG00000021174	ENSGALT00000012936		Function unknown	asparagine-linked glycosylation 9, alpha-1,2-mannosyltransferase homolog (S. cerevisiae)	A118V, G221A, I359V, L494E, P527S,	--
ENSGALG00000007972	ENSGALT00000012944	TRPC5	Intracellular trafficking, secretion, and vesicular transport	Transient receptor potential cation channel subfamily C member	T905S,	--
ENSGALG00000007974	ENSGALT00000012947	NUP85	Intracellular trafficking, secretion, and vesicular transport	nuclear pore complex protein	P71R, V121I,	--
ENSGALG00000007980	ENSGALT00000012958	KCNG1	Inorganic ion transport and metabolism	Potassium voltage-gated channel, subfamily G, member 1	H47P, D51N,	--
ENSGALG00000007992	ENSGALT00000012976	GGA3	Intracellular trafficking, secretion, and vesicular transport	golgi-associated, gamma adaptin ear containing, ARF binding protein	F146L, V233A, L434R, N447S, A596S, K606R, I622V,	--
ENSGALG00000007994	ENSGALT00000012978	PARD6B	Posttranslational modification, protein turnover, chaperones	par-6 (partitioning defective 6) homolog	M109V,	--
ENSGALG00000007996	ENSGALT00000012982	ANKRD44	General function prediction only	Ankyrin Repeat	E154Q,	--
ENSGALG00000007998	ENSGALT00000012986	SLC26A4	Inorganic ion transport and metabolism	sulfate transporter	I466V, R545K,	--
ENSGALG00000008010	ENSGALT00000013001	PTPN1	Signal transduction mechanisms	protein tyrosine phosphatase	R417K,	--
ENSGALG00000008018	ENSGALT00000013010	SNAI1	General function prediction only	Snail homolog 2 (Drosophila)	P43S, Q136H,	--
ENSGALG00000008023	ENSGALT00000013018	TMEM94	Function unknown	kiaa0195	A503T, H504Y, H532Q, I1253V,	--
ENSGALG00000008026	ENSGALT00000013022	SPATA2	Posttranslational modification, protein turnover, chaperones	spermatogenesis associated 2	H312R, V321L, S380A, S417A,	--
ENSGALG00000008037	ENSGALT00000013040	HORMAD2	Chromatin structure and dynamics	HORMA domain containing	T28S, N169S, E259D,	--
ENSGALG00000008038	ENSGALT00000013044	SF3B1	RNA processing and modification	Splicing factor 3b subunit	D60E,	--
ENSGALG00000008039	ENSGALT00000013045	MFSD13A	Function unknown	Transmembrane protein 180	E227A,	--
ENSGALG00000008050	ENSGALT00000013062	HBP1	Transcription	HMG-box transcription factor 1	Q401P,	--
ENSGALG00000008055	ENSGALT00000013070	SYT13	General function prediction only	synaptotagmin XIII	L116S, D328G,	--
ENSGALG00000008057	ENSGALT00000013074	LLGL2	General function prediction only	Lethal giant larvae homolog	E165D, A173T, V273M, S664N, R668Q,	--
ENSGALG00000008059	ENSGALT00000013083	ASCC2	General function prediction only	activating signal cointegrator 1 complex subunit 2	K117R, P488A, Q565E,	--
ENSGALG00000008072	ENSGALT00000013105	CHRDL1	Posttranslational modification, protein turnover, chaperones	Chordin-like	I361V,	--
ENSGALG00000008076	ENSGALT00000013109	TMEM164	Function unknown	Transmembrane protein 164	E101D, L313M,	--
ENSGALG00000008088	ENSGALT00000013126	ACSL4	Lipid transport and metabolism	Amp-dependent synthetase and ligase	K93R, E335D,	--
ENSGALG00000008096	ENSGALT00000013142	SUFU	Signal transduction mechanisms	Suppressor of fused homolog (Drosophila)	D111E,	--
ENSGALG00000008100	ENSGALT00000013147	RAPSN	General function prediction only	receptor-associated protein of the synapse	T102A, L323V,	--
ENSGALG00000008103	ENSGALT00000013152	CEP41	Posttranslational modification, protein turnover, chaperones	centrosomal protein	A163V, I197T, A278T,	--
ENSGALG00000008166	ENSGALT00000013275	TLR15	Signal transduction mechanisms	TOLL-like receptor	G78E, N94D, S202P, L282F, I493V,	--
ENSGALG00000008169	ENSGALT00000013282	GDI2	Posttranslational modification, protein turnover, chaperones	GDP dissociation inhibitor	E395G,	--
ENSGALG00000008175	ENSGALT00000013290	ORC5	Replication, recombination and repair	origin recognition complex subunit	L84I, S97C, F184L,	--
ENSGALG00000008185	ENSGALT00000013327	AOX1	Nucleotide transport and metabolism	xanthine dehydrogenase	Q177R, N230D, D304N, R364Q, G403D, I407V, E531Q, T993A, P1120R, S1253F, R1286S,	--
ENSGALG00000008193	ENSGALT00000013344	RELN	Posttranslational modification, protein turnover, chaperones	Extracellular matrix serine protease that plays a role in layering of neurons in the cerebral cortex and cerebellum. Regulates microtubule function in neurons and neuronal migration. Affects migration of sympathetic preganglionic neurons in the spinal cord, where it seems to act as a barrier to neuronal migration. Enzymatic activity is important for the modulation of cell adhesion. Binding to the…	K1081N, Y1917N, L2280M, V2565I, I2721V, T3069A,	--
ENSGALG00000008217	ENSGALT00000013375	RNFT2	Posttranslational modification, protein turnover, chaperones	Ring finger protein, transmembrane	R375H, S382T,	--
ENSGALG00000008226	ENSGALT00000013388	NIF3L1	Function unknown	dinuclear metal center protein, YbgI	S259L, N359D,	--
ENSGALG00000008228	ENSGALT00000013390	PPIL3	Posttranslational modification, protein turnover, chaperones	PPIases accelerate the folding of proteins	N38S,	--
ENSGALG00000008234	ENSGALT00000013401	ORC2	Replication, recombination and repair	Origin recognition complex, subunit 2	S124P, E191V, K194N, D560G,	--
ENSGALG00000008249	ENSGALT00000013428	DNAJC2	Translation, ribosomal structure and biogenesis ,Posttranslational modification, protein turnover, chaperones ,	homolog, subfamily C, member	H109R,	--
ENSGALG00000008253	ENSGALT00000013434	TBX5	Transcription	t-box transcription factor	G477S,	--
ENSGALG00000008263	ENSGALT00000013444	CNTN4	Posttranslational modification, protein turnover, chaperones	Contactin	R805K, A874E,	--
ENSGALG00000008269	ENSGALT00000013458	ZC3H6	RNA processing and modification	zinc finger CCCH-type containing	N151T, N537S, N933S, S1071A, T1175A,	--
ENSGALG00000008270	ENSGALT00000013462	CALHM2	Intracellular trafficking, secretion, and vesicular transport	calcium homeostasis modulator 2	P114S, N222S, G311S,	--
ENSGALG00000008271	ENSGALT00000013463	CALHM1	Function unknown	calcium homeostasis modulator 1	V135L, S203F, K228R, S254G, D256N, A291V, G317R,	D256N,
ENSGALG00000008272	ENSGALT00000013464	TMED3	Intracellular trafficking, secretion, and vesicular transport	Transmembrane emp24 protein transport domain containing	T87A, V109I,	--
ENSGALG00000008273	ENSGALT00000013465	CALHM3	Function unknown	calcium homeostasis modulator 3	S13T, M107L, R251Q,	--
ENSGALG00000008274	ENSGALT00000013466	CRBN	Posttranslational modification, protein turnover, chaperones	Component of some DCX (DDB1-CUL4-X-box) E3 protein ligase complex, a complex that mediates the ubiquitination and subsequent proteasomal degradation of target proteins and is required for limb outgrowth and expression of the fibroblast growth factor FGF8. In the complex, may act as a substrate receptor	S241P,	--
ENSGALG00000008283	ENSGALT00000013480		Secondary metabolites biosynthesis, transport and catabolism	Cytochrome p450	E69D, P235S, K397N,	--
ENSGALG00000008285	ENSGALT00000013482	NAPEPLD	General function prediction only	Hydrolase	N96S, D171A, K172I, L177V, Y180F, M195L, V429A, K442N, S453A,	--
ENSGALG00000008293	ENSGALT00000013503	SH3PXD2A	Signal transduction mechanisms	SH3 and PX domains	G981S,	--
ENSGALG00000008298	ENSGALT00000013512	LRRC17	Function unknown	leucine rich repeat containing 17	I53V, R89K,	--
ENSGALG00000008306	ENSGALT00000013522	FGL2	Function unknown	Fibrinogen-like 2	P57L,	--
ENSGALG00000008313	ENSGALT00000013531	NAPB	Intracellular trafficking, secretion, and vesicular transport	N-ethylmaleimide-sensitive factor attachment protein	L223V,	--
ENSGALG00000008320	ENSGALT00000013543	EDEM1	Carbohydrate transport and metabolism	ER degradation enhancer, mannosidase alpha-like	R252Q,	--
ENSGALG00000008321	ENSGALT00000013545	RNPEPL1	Amino acid transport and metabolism	aminopeptidase	H211R,	--
ENSGALG00000008332	ENSGALT00000013559	F2	Posttranslational modification, protein turnover, chaperones	protease	M89L, P186H, E201R, I282L, E333S,	--
ENSGALG00000008335	ENSGALT00000013567	PHTF2	Transcription	Homeodomain transcription factor	I135V, R260H, T276A,	--
ENSGALG00000008348	ENSGALT00000013589	PDIA3	Posttranslational modification, protein turnover, chaperones	Thioredoxin	K232I, R480Q,	--
ENSGALG00000008365	ENSGALT00000013620	CHRM4	Signal transduction mechanisms	Cholinergic receptor, muscarinic	R309K,	--
ENSGALG00000008381	ENSGALT00000013654	TMEM237	Intracellular trafficking, secretion, and vesicular transport	transmembrane protein 237	E47D,	--
ENSGALG00000008415	ENSGALT00000013707	ALS2	Function unknown	whole genome shotgun sequence	I325M, T361A, S768G,	I325M,
ENSGALG00000008417	ENSGALT00000013711	CFAP58	Function unknown	Coiled-coil domain containing 147	T82S, K104E, S288N, D331A,	--
ENSGALG00000008420	ENSGALT00000013716	CAND2	General function prediction only	cullin-associated and neddylation-dissociated	I305L, G572S, I728V, S734P, L765V, S1205A,	--
ENSGALG00000008427	ENSGALT00000013728	GNAT3	General function prediction only	Guanine nucleotide binding protein (G protein), alpha	E125K,	--
ENSGALG00000008434	ENSGALT00000013741	SORCS3	Intracellular trafficking, secretion, and vesicular transport	Sortilin-related VPS10 domain containing receptor	V620I, C698G,	--
ENSGALG00000008436	ENSGALT00000013745	CRY2	Replication, recombination and repair	deoxyribo-dipyrimidine photolyase	N160S,	--
ENSGALG00000008437	ENSGALT00000013746	NET1	Signal transduction mechanisms	Rho guanine nucleotide exchange factor (GEF)	I282V, Q481W,	--
ENSGALG00000008445	ENSGALT00000013756	SLC24A3	Inorganic ion transport and metabolism	Solute carrier family 24 (Sodium potassium calcium exchanger), member	T358S,	--
ENSGALG00000008452	ENSGALT00000013770	IFT122	General function prediction only	Intraflagellar transport 122 homolog (Chlamydomonas)	E170D, T931I, I969V, S1077R,	--
ENSGALG00000008454	ENSGALT00000013776	NOP58	Translation, ribosomal structure and biogenesis	Nucleolar protein	I226V, I252V, E469V,	--
ENSGALG00000008460	ENSGALT00000013788	ZFYVE19	Signal transduction mechanisms ,Intracellular trafficking, secretion, and vesicular transport ,	Zinc finger, FYVE domain containing 19	K77R,	--
ENSGALG00000008466	ENSGALT00000013797		General function prediction only	Glucocorticoid induced transcript 1	T91A, G154A,	--
ENSGALG00000008470	ENSGALT00000013803	WDR12	Translation, ribosomal structure and biogenesis	Component of the NOP7 complex, which is required for maturation of the 25S and 5.8S ribosomal RNAs and formation of the 60S ribosome (By similarity)	M72L,	--
ENSGALG00000008487	ENSGALT00000013831	TMCC1	Function unknown	transmembrane and coiled-coil domain family	L83M, D144E, G148C, A207T,	--
ENSGALG00000008491	ENSGALT00000013836	XIAP	Posttranslational modification, protein turnover, chaperones	X-linked inhibitor of apoptosis	P75L, M147I, L182F, C347Y, I375V, L392W, N416D, P422S, D430G,	--
ENSGALG00000008496	ENSGALT00000013841	VPS18	Intracellular trafficking, secretion, and vesicular transport	Vacuolar Protein	L208V, I505V,	--
ENSGALG00000008506	ENSGALT00000013856	MRPS25	Translation, ribosomal structure and biogenesis	Mitochondrial ribosomal protein S25	K115R,	--
ENSGALG00000008507	ENSGALT00000013858	THOC2	Transcription	Tho complex 2	H284Q,	--
ENSGALG00000008513	ENSGALT00000013866	C1GALT1C1	Lipid transport and metabolism	C1GALT1-specific chaperone 1	A36G, V69I, G81S, E88D, R132H,	--
ENSGALG00000008518	ENSGALT00000013873		Amino acid transport and metabolism	glutamine synthetase	D56G, A109T,	--
ENSGALG00000008523	ENSGALT00000013886	XPNPEP1	Amino acid transport and metabolism	X-prolyl aminopeptidase (Aminopeptidase P)	M72V, T153A, A277V,	--
ENSGALG00000008529	ENSGALT00000013901	FASTKD2	Signal transduction mechanisms	FAST kinase domains 2	A246V, L537V, A623V,	--
ENSGALG00000008532	ENSGALT00000013905	NELFB	Transcription	cofactor of BRCA1	P400L, A410P, T561A,	--
ENSGALG00000008536	ENSGALT00000013911	KLHDC3	Function unknown	kelch domain containing 3	F245V,	--
ENSGALG00000008542	ENSGALT00000013918	ADD3	Carbohydrate transport and metabolism	Class II aldolase adducin	S210N,	--
ENSGALG00000008548	ENSGALT00000013926	MDH1B	Energy production and conversion	Catalyzes the reversible oxidation of malate to oxaloacetate (By similarity)	F32L, E53Q, L128R, I148L, L219S, E455V,	--
ENSGALG00000008550	ENSGALT00000013928	MRPS5	Translation, ribosomal structure and biogenesis	Located at the back of the 30S subunit body where it stabilizes the conformation of the head with respect to the body (By similarity)	H257Q, K312R,	--
ENSGALG00000008551	ENSGALT00000013929	CRELD2	Posttranslational modification, protein turnover, chaperones	cysteine-rich with egf-like domains	T216I, I231T,	--
ENSGALG00000008553	ENSGALT00000013933	INO80	Replication, recombination and repair	DNA helicase component of the INO80 complex which remodels chromatin by shifting nucleosomes and is involved in DNA repair (By similarity)	E104G, Q461H, N974S,	Q461H,
ENSGALG00000008563	ENSGALT00000013948	ENTPD6	Carbohydrate transport and metabolism ,Posttranslational modification, protein turnover, chaperones ,	Ectonucleoside triphosphate diphosphohydrolase	D357G,	--
ENSGALG00000008564	ENSGALT00000013950	NSUN6	Translation, ribosomal structure and biogenesis	nOP2 Sun	F141V,	--
ENSGALG00000008585	ENSGALT00000013979	SMC3	Cell cycle control, cell division, chromosome partitioning	Required for chromosome condensation and partitioning (By similarity)	E67V,	--
ENSGALG00000008587	ENSGALT00000013981	NDUFAF1	Posttranslational modification, protein turnover, chaperones	NADH dehydrogenase (ubiquinone) complex I, assembly factor 1	Y130H,	--
ENSGALG00000008589	ENSGALT00000013983	GPR1	Intracellular trafficking, secretion, and vesicular transport	G protein-coupled receptor 1	D273G,	--
ENSGALG00000008590	ENSGALT00000013984	EEF1B2	Translation, ribosomal structure and biogenesis	Promotes the exchange of GDP for GTP in EF-1-alpha GDP, thus allowing the regeneration of EF-1-alpha GTP that could then be used to form the ternary complex EF-1-alpha GTP AAtRNA (By similarity)	A36V,	--
ENSGALG00000008599	ENSGALT00000014001		Function unknown	Sulfotransferase family	I160V,	--
ENSGALG00000008601	ENSGALT00000014007	AHSG	Function unknown	Alpha-2-HS-glycoprotein	E104Q,	--
ENSGALG00000008606	ENSGALT00000014015	NDUFS1	Energy production and conversion	subunit G	V316I, L359M, S553A,	L359M,
ENSGALG00000008611	ENSGALT00000014023	ZBTB33	General function prediction only	C2H2 finger domain protein	V212A, N227S, T287M,	--
ENSGALG00000019384	ENSGALT00000014027	MAPK12	Signal transduction mechanisms	Mitogen-activated protein kinase	N82K,	--
ENSGALG00000008616	ENSGALT00000014039	GTF2H4	Signal transduction mechanisms	Discoidin domain receptor tyrosine kinase	V179I, I189L,	--
ENSGALG00000008623	ENSGALT00000014051	TOR4A	Posttranslational modification, protein turnover, chaperones	torsin family 4, member A	D18G, L77V, L344F,	--
ENSGALG00000008625	ENSGALT00000014053	ANAPC2	Cell cycle control, cell division, chromosome partitioning	anaphase promoting complex subunit 2	R329T,	--
ENSGALG00000008627	ENSGALT00000014055	TTBK1	Signal transduction mechanisms	Tau tubulin kinase	T662A, A692V, P1068L, T1254S,	--
ENSGALG00000008629	ENSGALT00000014063		Intracellular trafficking, secretion, and vesicular transport	mannose receptor, C type 1	P494S, T495A,	--
ENSGALG00000008631	ENSGALT00000014067	TYRO3	Signal transduction mechanisms	Serine Threonine protein kinase	V454M, S801P,	--
ENSGALG00000008632	ENSGALT00000014068	ACSS1	Lipid transport and metabolism	Acyl-CoA synthetase short-chain family member	V629I, V648I,	--
ENSGALG00000008645	ENSGALT00000014085	NKRF	Transcription	NFKB repressing factor	K96T, Q157P, K304R,	--
ENSGALG00000008651	ENSGALT00000014091	APMAP	Carbohydrate transport and metabolism	SMP-30 gluconolaconase LRE domain protein	E73D, D201G,	--
ENSGALG00000008661	ENSGALT00000014106	CYR61	Extracellular structures	Cysteine-rich angiogenic inducer 61	E172G,	--
ENSGALG00000008666	ENSGALT00000014112	CTLA4	General function prediction only	Cytotoxic T-lymphocyte-associated protein 4	F159L, V170M,	--
ENSGALG00000008677	ENSGALT00000014123	VIM	Cytoskeleton	vimentin	A346S,	--
ENSGALG00000008701	ENSGALT00000014160	XDH	Nucleotide transport and metabolism	xanthine dehydrogenase	M216V, Q250L, A273T, R514H, K1010R, E1014D, V1050I, S1136A,	--
ENSGALG00000008703	ENSGALT00000014162	RFC4	Replication, recombination and repair	DNA polymerase III subunit delta'	P15S, A18I, F99L, S281G, K292Q,	--
ENSGALG00000008722	ENSGALT00000014191	MCOLN2	Inorganic ion transport and metabolism	mucolipin	I112V,	--
ENSGALG00000008733	ENSGALT00000014213	LPAR3	Signal transduction mechanisms	lysophosphatidic acid receptor 3	I31V, I340S,	--
ENSGALG00000008739	ENSGALT00000014221	FAM188A	Function unknown	Family with sequence similarity 188, member A	S121G,	--
ENSGALG00000008752	ENSGALT00000014241		General function prediction only	Hydrolase	V346I,	--
ENSGALG00000008763	ENSGALT00000014255	SSX2IP	Function unknown	Synovial sarcoma, X breakpoint 2 interacting protein	F51L,	--
ENSGALG00000008764	ENSGALT00000014256	FAM171A1	Function unknown	family with sequence similarity 171, member A1	T159S, T471A, P632A,	--
ENSGALG00000008780	ENSGALT00000014277	CTBS	Carbohydrate transport and metabolism	hydrolase, family 18	V327A, K328R, S342C, T355A,	--
ENSGALG00000008793	ENSGALT00000014296	SEC23B	Intracellular trafficking, secretion, and vesicular transport	Sec23 homolog A (S. cerevisiae)	I167V,	--
ENSGALG00000008795	ENSGALT00000014299	GPAM	Lipid transport and metabolism	glycerol3phosphate acyltransferase	K172R, F290V,	--
ENSGALG00000008810	ENSGALT00000014319	FAM161A	Function unknown	family with sequence similarity 161, member A	A294T, K321R,	--
ENSGALG00000008811	ENSGALT00000014322	SLC1A4	Energy production and conversion	sodium dicarboxylate symporter	S163R, E216D, V231L, N474H, S501T,	--
ENSGALG00000008812	ENSGALT00000014324	CCT4	Posttranslational modification, protein turnover, chaperones	T-complex protein 1 subunit delta	I243V,	--
ENSGALG00000008813	ENSGALT00000014327	CROT	Function unknown	carnitine O-octanoyltransferase	L43V, E47D,	--
ENSGALG00000008823	ENSGALT00000014340	IQUB	Function unknown	IQ motif and ubiquitin domain containing	K259R, T358S, L385I, N391H,	--
ENSGALG00000008827	ENSGALT00000014344	FERMT1	Cytoskeleton	fermitin family member	Q627H,	Q627H,
ENSGALG00000008836	ENSGALT00000014357	ATP6AP1	Energy production and conversion	ATPase, H transporting, lysosomal accessory protein 1	Q161P, N259S, T288A,	--
ENSGALG00000008838	ENSGALT00000014359	FKBP15	Function unknown	Peptidyl-prolyl cis-trans isomerase	L199V,	--
ENSGALG00000008845	ENSGALT00000014374	HAO1	Energy production and conversion	Catalyzes the 1,3-allylic rearrangement of the homoallylic substrate isopentenyl (IPP) to its allylic isomer, dimethylallyl diphosphate (DMAPP) (By similarity)	Q176R,	--
ENSGALG00000008847	ENSGALT00000014378	VPS54	Intracellular trafficking, secretion, and vesicular transport	vacuolar protein sorting 54 homolog (S. cerevisiae)	G356S, I564V,	--
ENSGALG00000008861	ENSGALT00000014393	BSPRY	General function prediction only	B-box and SPRY domain containing	D148N,	--
ENSGALG00000008862	ENSGALT00000014395	DNAJC10	Posttranslational modification, protein turnover, chaperones	Thioredoxin	V178A,	--
ENSGALG00000008866	ENSGALT00000014402	WDPCP	Function unknown	WD repeat containing planar cell polarity effector	S82T, H240L, A277V, E280K, S311T, I470V,	--
ENSGALG00000008867	ENSGALT00000014405	COMMD5	Function unknown	COMM domain containing 5	G142S,	--
ENSGALG00000008874	ENSGALT00000014416	SLC13A1	Inorganic ion transport and metabolism	Solute carrier family 13	S417L,	--
ENSGALG00000008890	ENSGALT00000014453	ADGRL4	General function prediction only	EGF, latrophilin and seven transmembrane domain containing 1	T252P, N260S,	--
ENSGALG00000008902	ENSGALT00000014475	GIPC2	Signal transduction mechanisms ,Intracellular trafficking, secretion, and vesicular transport ,	GIPC PDZ domain containing family, member	D125E,	--
ENSGALG00000008909	ENSGALT00000014487	USP13	Posttranslational modification, protein turnover, chaperones	ubiquitin carboxyl-terminal hydrolase	F137L, R840K,	--
ENSGALG00000008914	ENSGALT00000014498	NRAP	Function unknown	nebulin-related anchoring protein	R165H, N381S, V662A, R753K, R926L, G1082S, F1530Y, N1597T, S1697A,	--
ENSGALG00000008920	ENSGALT00000014501		Inorganic ion transport and metabolism	Component of the sulfite reductase complex that catalyzes the 6-electron reduction of sulfite to sulfide. This is one of several activities required for the biosynthesis of L- cysteine from sulfate. The flavoprotein component catalyzes the electron flow from NADPH - FAD - FMN to the hemoprotein component (By similarity)	E3G, Q216R,	--
ENSGALG00000008930	ENSGALT00000014514	B3GNT2	Intracellular trafficking, secretion, and vesicular transport	UDP-GlcNAc betaGal beta-1,3-N-acetylglucosaminyltransferase 2	G31S, P54L,	--
ENSGALG00000008933	ENSGALT00000014519	CASP7	Cell cycle control, cell division, chromosome partitioning	apoptosis-related cysteine peptidase	A131V,	--
ENSGALG00000008937	ENSGALT00000014523	PPP1R21	Signal transduction mechanisms	protein phosphatase 1, regulatory subunit 21	T768A,	--
ENSGALG00000008946	ENSGALT00000014546	NHLRC2	Posttranslational modification, protein turnover, chaperones	NHL repeat containing	K370R, R539H, Q581R, D622G,	--
ENSGALG00000008947	ENSGALT00000014550	PAK7	Signal transduction mechanisms	p21 protein (Cdc42 Rac)-activated kinase	H119R,	--
ENSGALG00000008950	ENSGALT00000014555	EHD4	Signal transduction mechanisms ,Intracellular trafficking, secretion, and vesicular transport ,	EH-domain containing	N407S,	--
ENSGALG00000008956	ENSGALT00000014566	CCDC186	Function unknown	chromosome 10 open reading frame 118	K200R, T439A, S492P,	--
ENSGALG00000008975	ENSGALT00000014601	FAM3C	Function unknown	Family with sequence similarity 3, member C	A40G,	--
ENSGALG00000008976	ENSGALT00000014604	ADAM22	Posttranslational modification, protein turnover, chaperones	ADAM metallopeptidase domain	H24N, Q70R, D259A,	--
ENSGALG00000008988	ENSGALT00000014619	ZZZ3	Chromatin structure and dynamics	zinc finger, ZZ-type containing 3	N223S, S635N,	--
ENSGALG00000008991	ENSGALT00000014624	VPS39	Function unknown	vacuolar protein sorting 39 homolog (S. cerevisiae)	E556D,	--
ENSGALG00000008997	ENSGALT00000014634	STEAP4	General function prediction only	NADP oxidoreductase coenzyme F420-dependent	M167I, L173V,	--
ENSGALG00000009004	ENSGALT00000014653	ZNF804B	General function prediction only	zinc finger protein 804B	G93R, L236M, C331Y, L355P, Q575R, V683L, K799Q, R807K, G824A, Q1108H, L1243M, V1276A,	--
ENSGALG00000009013	ENSGALT00000014663	MKKS	Posttranslational modification, protein turnover, chaperones	McKusick-Kaufman syndrome	R3C, K232R, H264R, V396A, D435G, S488T, G500R, T538M,	--
ENSGALG00000009015	ENSGALT00000014667	PIGK	Posttranslational modification, protein turnover, chaperones	phosphatidylinositol glycan anchor biosynthesis, class K	Q37H, G42R, N298S,	--
ENSGALG00000009016	ENSGALT00000014668	SLX4IP	Function unknown	SLX4 interacting protein	N82S, K292E, T298S, E322G, E347G, R354G,	--
ENSGALG00000009017	ENSGALT00000014669	STEAP2	General function prediction only	NADP oxidoreductase, coenzyme f420-dependent	S29G, I89V, I228V, K416R,	--
ENSGALG00000009020	ENSGALT00000014678	JAG1	General function prediction only	Notch ligand involved in the mediation of Notch signaling (By similarity)	G378S, F672S, H766Y,	--
ENSGALG00000009032	ENSGALT00000014698		Replication, recombination and repair	PIF1 5'-to-3' DNA helicase homolog (S. cerevisiae)	K55N, E93D,	--
ENSGALG00000009036	ENSGALT00000014708	GANC	Carbohydrate transport and metabolism	hydrolase, family 31	K297R, H825N,	--
ENSGALG00000009037	ENSGALT00000014709	SPTLC3	Coenzyme transport and metabolism	8-Amino-7-oxononanoate synthase	T160I,	--
ENSGALG00000009038	ENSGALT00000014710	CLDN12	Function unknown	claudin 12	N159S,	--
ENSGALG00000009040	ENSGALT00000014716	TBC1D8B	General function prediction only	TBC1 domain family member	S338N, S432G, K740R, E1068Q, N1117H,	--
ENSGALG00000009042	ENSGALT00000014720	ISM1	Posttranslational modification, protein turnover, chaperones	isthmin 1 homolog (zebrafish)	F78L, K142R,	--
ENSGALG00000009045	ENSGALT00000014724	EBNA1BP2	Function unknown	EBNA1 binding protein 2	V126I,	--
ENSGALG00000009057	ENSGALT00000014743	TASP1	Amino acid transport and metabolism	asparaginase	G6E,	--
ENSGALG00000009063	ENSGALT00000014751		General function prediction only	Neuronal pas domain protein	M153V, A159S, M427I, H605R, N629S, T648A,	--
ENSGALG00000009067	ENSGALT00000014755	GPR50	Intracellular trafficking, secretion, and vesicular transport	G protein-coupled receptor 50	L308V,	--
ENSGALG00000009076	ENSGALT00000014768	NDUFB5	Intracellular trafficking, secretion, and vesicular transport	NADH dehydrogenase (Ubiquinone) 1 beta subcomplex, 5	F59Y, P125S,	--
ENSGALG00000009082	ENSGALT00000014777	ADCK3	General function prediction only	AarF domain containing kinase	S104T,	--
ENSGALG00000009086	ENSGALT00000014784	EHD3	Signal transduction mechanisms ,Intracellular trafficking, secretion, and vesicular transport ,	EH-domain containing	D337E, K377R,	K377R,
ENSGALG00000009095	ENSGALT00000014806	LHCGR	Intracellular trafficking, secretion, and vesicular transport	hormone receptor	Q165R, T217I, D223Y, R281K, I572V, P697S, A700T,	--
ENSGALG00000009096	ENSGALT00000014807		General function prediction only	Myotubularin related protein	L23I,	--
ENSGALG00000009097	ENSGALT00000014809	SNAP23	Intracellular trafficking, secretion, and vesicular transport	Synaptosomal-associated protein	R100K,	--
ENSGALG00000009100	ENSGALT00000014813	FSHR	Intracellular trafficking, secretion, and vesicular transport	hormone receptor	K219Q, G317D, N374D, H674Y,	--
ENSGALG00000009098	ENSGALT00000014860	MAMLD1	General function prediction only	mastermind-like domain containing 1	P70S, E71V, M100I, L260P, P296S, A312T, S343G, T417N, M457L, N681S, G874S, A994T,	--
ENSGALG00000009128	ENSGALT00000014861		Function unknown	Chromosome X open reading frame	L98P, E106D,	--
ENSGALG00000009134	ENSGALT00000014876	CTTNBP2	General function prediction only	Ankyrin Repeat	I356V, V1410I, Q1622P,	--
ENSGALG00000009154	ENSGALT00000014910	IDS	Inorganic ion transport and metabolism	Sulfatase	I83L, K215E, D216G, I247V, L285M,	--
ENSGALG00000009157	ENSGALT00000014916		Signal transduction mechanisms	Epithelial cell transforming sequence 2 oncogene	M322L,	--
ENSGALG00000009169	ENSGALT00000014935	TRMT6	Translation, ribosomal structure and biogenesis	tRNA methyltransferase 6 homolog (S. cerevisiae)	M221L, F242Y, E310V, F324I,	--
ENSGALG00000009179	ENSGALT00000014953	TNFSF10	RNA processing and modification	tumor necrosis factor (ligand) superfamily, member 10	R150K, I211V,	--
ENSGALG00000009185	ENSGALT00000014960	ROM1	Intracellular trafficking, secretion, and vesicular transport	peripherin 2 (retinal degeneration, slow)	A88D, T155M, I332V,	--
ENSGALG00000007714	ENSGALT00000014965	NMUR1	Intracellular trafficking, secretion, and vesicular transport	neuromedin U receptor	M247I,	--
ENSGALG00000009192	ENSGALT00000014971	SLITRK2	Signal transduction mechanisms	SLIT and NTRK-like family, member	S269Y, P315S, T684M, E685D, Q750K, A789P, R796H, Q848R,	--
ENSGALG00000009195	ENSGALT00000014975	MCM8	Replication, recombination and repair	dna replication licensing factor	N400K,	--
ENSGALG00000009207	ENSGALT00000014990	TRIM2	Posttranslational modification, protein turnover, chaperones	tripartite motif containing 2	T317S, K520R,	--
ENSGALG00000009212	ENSGALT00000014996	MND1	Cell cycle control, cell division, chromosome partitioning	meiotic nuclear divisions 1 homolog (S. cerevisiae)	M16V, S76G, A128S, K133N,	--
ENSGALG00000009217	ENSGALT00000015002	TBC1D24	General function prediction only	TBC1 domain family member	K55R, Q265R,	--
ENSGALG00000009231	ENSGALT00000015025	PNLIP	Carbohydrate transport and metabolism	pancreatic	L266I, K358Q,	--
ENSGALG00000009241	ENSGALT00000015038	SFRP2	Posttranslational modification, protein turnover, chaperones	Secreted frizzled-related protein 2	A165G,	--
ENSGALG00000009248	ENSGALT00000015047	HSPA12A	Posttranslational modification, protein turnover, chaperones	Heat shock 70kDa protein 12A	V456I,	--
ENSGALG00000009249	ENSGALT00000015050	UBR1	Posttranslational modification, protein turnover, chaperones	Ubiquitin protein ligase E3 component n-recognin	K329R, G1253E, N1375D, C1474F,	--
ENSGALG00000009257	ENSGALT00000015067	PLRG1	RNA processing and modification	Pleiotropic regulator 1	N415S,	--
ENSGALG00000009260	ENSGALT00000015071	TMEM62	General function prediction only	transmembrane protein 62	V115I, I204V, V442A, H475N, R570H,	--
ENSGALG00000009276	ENSGALT00000015091	LRAT	Lipid transport and metabolism	lecithin retinol acyltransferase (phosphatidylcholine--retinol O-acyltransferase)	I190V,	--
ENSGALG00000009280	ENSGALT00000015100	NPY2R	Intracellular trafficking, secretion, and vesicular transport	neuropeptide Y receptor Y2	S84N,	--
ENSGALG00000009282	ENSGALT00000015102	ELMSAN1	General function prediction only	ELM2 and Myb SANT-like domain containing 1	Q24H, G451S, G814V, V825E, D956H, K1003R,	--
ENSGALG00000009288	ENSGALT00000015109	RNPS1	RNA processing and modification	RNA binding protein S1, serine-rich domain	T52A,	--
ENSGALG00000009289	ENSGALT00000015112	SLC18A2	Intracellular trafficking, secretion, and vesicular transport	Solute carrier family 18 (Vesicular monoamine), member	L100Q,	--
ENSGALG00000009291	ENSGALT00000015115		General function prediction only	Alpha beta hydrolase	E73D, V311A,	--
ENSGALG00000009301	ENSGALT00000015138	CHRNA1	Intracellular trafficking, secretion, and vesicular transport	Cholinergic receptor, nicotinic, alpha 1 (Muscle)	A47V, D214E,	--
ENSGALG00000009304	ENSGALT00000015143	RAB11FIP2	General function prediction only	RAB11 family interacting protein 2 (class I)	E204D, N299S,	--
ENSGALG00000009305	ENSGALT00000015144	LBR	Lipid transport and metabolism	reductase	D153E, Q308K,	--
ENSGALG00000009336	ENSGALT00000015203	FAM45A	Function unknown	family with sequence similarity 45, member A	I180V,	--
ENSGALG00000009338	ENSGALT00000015206	ZFYVE1	General function prediction only	Zinc finger, FYVE domain containing 1	L580M,	--
ENSGALG00000009346	ENSGALT00000015220	HN1L	Function unknown	Hematological and neurological expressed 1-like	K143R,	--
ENSGALG00000009366	ENSGALT00000015254		Inorganic ion transport and metabolism	acid-sensing (proton-gated) ion channel family member 5	E183G,	--
ENSGALG00000009372	ENSGALT00000015267		General function prediction only	polyhomeotic homolog 3 (Drosophila)	T496A,	--
ENSGALG00000009373	ENSGALT00000015270	CTSO	Posttranslational modification, protein turnover, chaperones	cathepsin	S224R,	--
ENSGALG00000008676	ENSGALT00000015273	RRBP1	Intracellular trafficking, secretion, and vesicular transport	ribosome binding protein 1 homolog 180kDa (dog)	V121L, P166S, V170L, V287I, Q649R, V687A, S825T,	--
ENSGALG00000009378	ENSGALT00000015275	PDGFC	RNA processing and modification	Platelet derived growth factor C	N188S,	--
ENSGALG00000009381	ENSGALT00000015283	SIPA1L1	Intracellular trafficking, secretion, and vesicular transport	Signal-induced proliferation-associated 1 like	N1388S,	--
ENSGALG00000009383	ENSGALT00000015289	SAMD7	General function prediction only	sterile alpha motif domain containing 7	T83A, A251T, N318S, D399G, D420E,	D399G,
ENSGALG00000009392	ENSGALT00000015302	TLR5	Function unknown	TOLL-like receptor	Q30R, N178D, E243D, F411Y, L603V, T675I, N744D,	--
ENSGALG00000009400	ENSGALT00000015312	SLC8A3	Inorganic ion transport and metabolism	Solute carrier family 8 sodium calcium exchanger member	M762I,	--
ENSGALG00000009403	ENSGALT00000015315	GRK5	Signal transduction mechanisms	g protein-coupled receptor kinase	T425A,	--
ENSGALG00000009409	ENSGALT00000015328	MYNN	General function prediction only	Myoneurin	R148Q,	--
ENSGALG00000009410	ENSGALT00000015329	PEX1	Posttranslational modification, protein turnover, chaperones	Aaa atpase	T194A, N250S, L394V, G566A, K762R, D1256E,	--
ENSGALG00000009413	ENSGALT00000015332	BROX	General function prediction only	BRO1 domain and CAAX motif containing	I72V, D134G,	--
ENSGALG00000009429	ENSGALT00000015353	RXFP1	Signal transduction mechanisms	Relaxin insulin-like family peptide receptor	K86R, A120D, H265R, V538I, R711K, H732D, N760H,	--
ENSGALG00000009431	ENSGALT00000015356	PLEKHD1	Signal transduction mechanisms	pleckstrin homology domain containing, family D (with coiled-coil domains) member 1	G112V, L302Q,	--
ENSGALG00000009441	ENSGALT00000015371	TAF1A	Transcription	TATA box binding protein (TBP)-associated factor, RNA polymerase I, A, 48kDa	S28P, A339V,	--
ENSGALG00000009448	ENSGALT00000015379	IFRD1	Transcription	Interferon-related developmental regulator	T212A,	--
ENSGALG00000009450	ENSGALT00000015381	DUSP10	Signal transduction mechanisms	dual specificity phosphatase 10	A49P, T82S, G134S, S160G,	--
ENSGALG00000009452	ENSGALT00000015383	GALNT16	Posttranslational modification, protein turnover, chaperones	UDP-N-acetyl-alpha-D-galactosamine polypeptide	Q539R,	--
ENSGALG00000009453	ENSGALT00000015385	2002-03-01	General function prediction only	MOSC domain-containing protein	P206H, D221H, Y306H, Y315L,	P206H, Y306H,
ENSGALG00000009454	ENSGALT00000015386	ZNF277	Transcription	zinc finger protein 277	I185V, N207S, C285R,	--
ENSGALG00000009456	ENSGALT00000015388	EXD2	General function prediction only	Exonuclease 3'-5' domain containing 2	S146C, G482S, P538S,	--
ENSGALG00000009467	ENSGALT00000015413	RBM48	General function prediction only	RNA binding motif protein 48	K141R, S184A,	--
ENSGALG00000009470	ENSGALT00000015416	SERPINI1	Posttranslational modification, protein turnover, chaperones	Serpin peptidase inhibitor, clade	V275L, Q303E,	--
ENSGALG00000009483	ENSGALT00000015441	MARK1	Signal transduction mechanisms	Serine Threonine protein kinase	E451D,	--
ENSGALG00000009488	ENSGALT00000015449	LRRN3	Signal transduction mechanisms	leucine rich repeat neuronal	L614Q,	--
ENSGALG00000009494	ENSGALT00000015456	THAP5	General function prediction only	THAP domain containing 5	K119E, S172G, P223A, H250Q,	--
ENSGALG00000009497	ENSGALT00000015460	AVPR2	Function unknown	7 transmembrane receptor (rhodopsin family)	R21S, V138L, Q241R,	--
ENSGALG00000009498	ENSGALT00000015461	NPY1R	Intracellular trafficking, secretion, and vesicular transport	Neuropeptide Y receptor Y1	T167M,	--
ENSGALG00000009500	ENSGALT00000015463	VPS50	Function unknown	Coiled-coil domain containing 132	I127V, S202R, R575K,	--
ENSGALG00000009503	ENSGALT00000015469	RAB3GAP2	Function unknown	RAB3 GTPase activating protein subunit 2 (Non-catalytic)	D570G, T682A, D720E, D729G, H898N, I1039L,	--
ENSGALG00000009505	ENSGALT00000015471	PNPLA8	General function prediction only	patatin-like phospholipase domain containing 8	N103S, D158G, S299G, E424V, K425R,	--
ENSGALG00000009510	ENSGALT00000015480	PIGH	Function unknown	phosphatidylinositol glycan anchor biosynthesis, class H	R180T,	--
ENSGALG00000009528	ENSGALT00000015511	TMEM192	Function unknown	Transmembrane protein 192	A49S, L189M,	--
ENSGALG00000009532	ENSGALT00000015515	GXYLT1	Posttranslational modification, protein turnover, chaperones	Glucoside xylosyltransferase	Y100D, V327I, H389R, I415V,	--
ENSGALG00000009533	ENSGALT00000015516	NMD3	Translation, ribosomal structure and biogenesis	60S ribosomal export protein Nmd3	K412R,	--
ENSGALG00000009538	ENSGALT00000015524		Lipid transport and metabolism ,Secondary metabolites biosynthesis, transport and catabolism ,	short-chain dehydrogenase reductase	A84I, T255M,	--
ENSGALG00000009566	ENSGALT00000015581	IARS2	Translation, ribosomal structure and biogenesis	amino acids such as valine, to avoid such errors it has two additional distinct tRNA(Ile)-dependent editing activities. One activity is designated as 'pretransfer' editing and involves the hydrolysis of activated Val-AMP. The other activity is designated 'posttransfer' editing and involves deacylation of mischarged Val-tRNA(Ile) (By similarity)	P259S, L375F, A427T, L432I, A471T, I732V, E841G, V888A,	--
ENSGALG00000009581	ENSGALT00000015609	MPP5	Nucleotide transport and metabolism	Essential for recycling GMP and indirectly, cGMP (By similarity)	I242T,	--
ENSGALG00000009583	ENSGALT00000015612	GORASP2	Intracellular trafficking, secretion, and vesicular transport	Golgi reassembly stacking protein	M306V, S319T, V361I, A414V,	--
ENSGALG00000009598	ENSGALT00000015639	EPRS	Translation, ribosomal structure and biogenesis	Catalyzes the attachment of glutamate to tRNA(Glu) in a two-step reaction glutamate is first activated by ATP to form Glu-AMP and then transferred to the acceptor end of tRNA(Glu) (By similarity)	A143V, I575T, V732I, A773S, T799M, L1479M,	--
ENSGALG00000009602	ENSGALT00000015648	MYO3B	Cytoskeleton	myosin IIIA	T115A, H658Q, F748Y,	--
ENSGALG00000009616	ENSGALT00000015668	SPATA17	Cytoskeleton	spermatogenesis associated 17	N162T,	--
ENSGALG00000009619	ENSGALT00000015671		Intracellular trafficking, secretion, and vesicular transport	G protein-coupled receptor 176	L132I,	--
ENSGALG00000009626	ENSGALT00000015678	THBS1	Posttranslational modification, protein turnover, chaperones	thrombospondin	L56P, V124I, E542D, D777E, N798S,	L56P,
ENSGALG00000009633	ENSGALT00000015687	KATNBL1	Function unknown	katanin p80 subunit B-like 1	A112V, R118P, S130P, A154V, K227E, I266V, Q277R, I291V,	--
ENSGALG00000009638	ENSGALT00000015694	ANO6	Function unknown	Anoctamin	I910L, T933I,	--
ENSGALG00000009640	ENSGALT00000015701	CHRM5	Signal transduction mechanisms	Cholinergic receptor, muscarinic	G385C, A389T,	--
ENSGALG00000009642	ENSGALT00000015704	AVEN	General function prediction only	Apoptosis, caspase activation inhibitor	A199V, K324G,	--
ENSGALG00000009667	ENSGALT00000015737	MFAP3L	Function unknown	microfibrillar-associated protein 3-like	S73N, N103S,	--
ENSGALG00000009676	ENSGALT00000015749	METTL5	Translation, ribosomal structure and biogenesis	methyltransferase like 5	T144A,	T144A,
ENSGALG00000009682	ENSGALT00000015759	VEPH1	General function prediction only	ventricular zone expressed PH domain homolog 1 (zebrafish)	Q38E, K135R, G243E, H299R, P521S,	--
ENSGALG00000009692	ENSGALT00000015774	SH3RF1	Posttranslational modification, protein turnover, chaperones	SH3 domain containing ring finger	A103S, G269S, T450I, V509L, A683V, A696S,	--
ENSGALG00000008497	ENSGALT00000015788	SLC38A2	Amino acid transport and metabolism	Solute carrier family 38 member	S40R, E186A, K240N, M248L, P264H, I270T,	--
ENSGALG00000020737	ENSGALT00000015791	KLHL23	Function unknown	Kelch-like 23 (Drosophila)	E190D, Q318P, V356M,	--
ENSGALG00000009704	ENSGALT00000015798	CHST15	Function unknown	Carbohydrate (N-acetylgalactosamine 4-sulfate 6-O) sulfotransferase 15	Q19R, F551S,	--
ENSGALG00000009725	ENSGALT00000015828	SCG5	Posttranslational modification, protein turnover, chaperones ,Intracellular trafficking, secretion, and vesicular transport ,	secretogranin V (7B2 protein)	A18T, T27A,	T27A,
ENSGALG00000009732	ENSGALT00000015841	PCDH18	Intracellular trafficking, secretion, and vesicular transport	protocadherin	R390K, S463G, I707M,	--
ENSGALG00000009752	ENSGALT00000015869	C1GALT1	General function prediction only	Core 1 synthase, glycoprotein-N-acetylgalactosamine 3-beta-galactosyltransferase, 1	S188N, K342N, L359P, S364P,	--
ENSGALG00000009758	ENSGALT00000015877	SLC7A11	Amino acid transport and metabolism	amino acid	K220R,	--
ENSGALG00000009759	ENSGALT00000015878	SLC16A7	Carbohydrate transport and metabolism	major facilitator Superfamily	L109V, I424V, A462S,	--
ENSGALG00000009784	ENSGALT00000015916	PTPN14	Signal transduction mechanisms	protein tyrosine phosphatase	N207S, I793T, P1098S,	--
ENSGALG00000009800	ENSGALT00000015941	SETD7	Transcription	SET domain containing (lysine methyltransferase) 7	H116Y,	--
ENSGALG00000009802	ENSGALT00000015943	ANGEL2	RNA processing and modification	Ccr4-NOT transcription complex, subunit	C32F, N55A, G95A, E174D, I316V, Q396E,	--
ENSGALG00000009805	ENSGALT00000015947	PPM1H	Signal transduction mechanisms	protein phosphatase, Mg2 Mn2 dependent	F99S,	--
ENSGALG00000009809	ENSGALT00000015954	MAML3	Transcription	mastermind-like 3 (Drosophila)	G165V, A329G, A789T, T825A, T1010A, S1018G,	--
ENSGALG00000009815	ENSGALT00000015961	TMEM5	Function unknown	Transmembrane protein 5	M260V, I287V, A300S, N434K,	--
ENSGALG00000009817	ENSGALT00000015965	ZNF770	Transcription	Zinc finger protein 770	Q100K, G158S, K195N, M238L, R362T, G368V, N465K, E594G, T608S,	--
ENSGALG00000015995	ENSGALT00000015972	PTPRA	Signal transduction mechanisms	protein tyrosine phosphatase	E350Q,	--
ENSGALG00000009830	ENSGALT00000015982		General function prediction only	Mannosyl (Alpha-1,3-)-glycoprotein beta-1,4-N-acetylglucosaminyltransferase, isozyme	Q196E, K218R, I265T, K295R, L431I,	--
ENSGALG00000009835	ENSGALT00000015988	XPOT	Translation, ribosomal structure and biogenesis	tRNA nucleus export receptor which facilitates tRNA translocation across the nuclear pore complex. Involved in pre- tRNA splicing, probably by affecting the interaction of pre-tRNA with splicing endonuclease (By similarity)	S48R,	--
ENSGALG00000009836	ENSGALT00000015989	ELMOD2	General function prediction only	ELMO CED-12 domain containing 2	A63S, H96R, E129D, N186D,	--
ENSGALG00000009837	ENSGALT00000015990	DTL	General function prediction only	denticleless E3 ubiquitin protein ligase homolog (Drosophila)	L203V, I318V, T371S, N380S, H500Y,	--
ENSGALG00000009840	ENSGALT00000015999	TBK1	Signal transduction mechanisms	TANK-binding kinase 1	K271R, I360V, T672S,	--
ENSGALG00000009841	ENSGALT00000016000	FASTKD1	Signal transduction mechanisms	FAST kinase domains 1	I103V, V124M, L199V, S278C, L427V, L463V, L707F, L811M,	--
ENSGALG00000009847	ENSGALT00000016008	STXBP6	Intracellular trafficking, secretion, and vesicular transport	syntaxin binding protein 6 (Amisyn)	L204V,	--
ENSGALG00000009854	ENSGALT00000016017	NEK2	Signal transduction mechanisms	kinase 2	P292S,	--
ENSGALG00000009861	ENSGALT00000016035	RD3	General function prediction only	Retinal degeneration 3	Q55E,	--
ENSGALG00000009871	ENSGALT00000016049	RCOR3	Transcription	Rest corepressor	S322G,	--
ENSGALG00000009881	ENSGALT00000016064	HHAT	Cell wall/membrane/envelope biogenesis	Membrane bOund o-acyl transferase mboat family protein	A114V, I134V,	--
ENSGALG00000009887	ENSGALT00000016072	DIEXF	Translation, ribosomal structure and biogenesis	DEAD-box RNA helicase-like protein required for pre-18S rRNA processing, specifically at sites A0, A1, and A2 (By similarity)	S94L, A102V, D148G, E172A, T244S, T355A, V605L,	--
ENSGALG00000009896	ENSGALT00000016090	TRERF1	Transcription	ELM2 and Myb SANT-like domain containing 1	V570I, K846R,	--
ENSGALG00000009902	ENSGALT00000016104	CFAP57	General function prediction only	WD repeat domain 65	K259Q, E640Q,	--
ENSGALG00000009903	ENSGALT00000016105	IFNG	Intracellular trafficking, secretion, and vesicular transport	Produced by lymphocytes activated by specific antigens or mitogens. IFN-gamma, in addition to having antiviral activity, has important immunoregulatory functions. It is a potent activator of macrophages, it has antiproliferative effects on transformed cells and it can potentiate the antiviral and antitumor effects of the type I interferons (By similarity)	P53S, I75V,	--
ENSGALG00000009907	ENSGALT00000016113	G2E3	Posttranslational modification, protein turnover, chaperones	G2 M-phase specific E3 ubiquitin protein ligase	E117D, M361I, K510E,	--
ENSGALG00000009911	ENSGALT00000016119	GLTSCR1L	Function unknown	kiaa0240	T531A, T538A, N541S, T628A, Q863L, S914C, Y919C,	--
ENSGALG00000003753	ENSGALT00000016123	CYLD	Posttranslational modification, protein turnover, chaperones	cylindromatosis (turban tumor syndrome)	D326E, E505V,	--
ENSGALG00000009934	ENSGALT00000016152	NUP107	Intracellular trafficking, secretion, and vesicular transport	nuclear pore complex protein	E16D, G96S, T441A, S525N, K530R, P769S,	--
ENSGALG00000009942	ENSGALT00000016163	MDM2	Posttranslational modification, protein turnover, chaperones	Mdm2, p53 E3 ubiquitin protein ligase homolog (mouse)	T158A,	--
ENSGALG00000009945	ENSGALT00000016170	CPM	General function prediction only	Carboxypeptidase	D101E,	--
ENSGALG00000009947	ENSGALT00000016174	PLEKHH2	Cytoskeleton	Pleckstrin homology domain containing, family H (With MyTH4 domain) member	R83T, T266M, V322A, Q397H, V454A, E710V, M822V, T929S, T1401P,	--
ENSGALG00000009954	ENSGALT00000016181	DYNC2LI1	Posttranslational modification, protein turnover, chaperones	Dynein, cytoplasmic 2, light intermediate chain 1	E97D, E148G, T150A, I158M, F304V,	--
ENSGALG00000009955	ENSGALT00000016182	ABCG5	General function prediction only	ATP-binding cassette, subfamily G (WHITE), member 5	H68Y, L252V,	--
ENSGALG00000009958	ENSGALT00000016186	ABCG8	General function prediction only	(ABC) transporter	N36S, V87I, S184L, A365G, M609T, K632R, L667I,	--
ENSGALG00000009959	ENSGALT00000016187		General function prediction only	RAB3A interacting protein	E32D,	--
ENSGALG00000009961	ENSGALT00000016194	ABCE1	General function prediction only	ATP-binding cassette, sub-family E	T42S,	--
ENSGALG00000009973	ENSGALT00000016212	SLC3A1	Carbohydrate transport and metabolism	alpha amylase, catalytic	M123V, T256K, E394K, A588G, N606D,	--
ENSGALG00000009974	ENSGALT00000016214	MMAA	Amino acid transport and metabolism	lAO AO transport system ATPase	A64P, K111Q,	--
ENSGALG00000009981	ENSGALT00000016222	PREPL	Amino acid transport and metabolism	Oligopeptidase b	K117R, R178Q, D229N,	--
ENSGALG00000009982	ENSGALT00000016223	ZNF827	General function prediction only	Zinc finger protein 827	A161V, L770F, E1003D,	--
ENSGALG00000010003	ENSGALT00000016251		Function unknown	Reeler domain	V72I,	--
ENSGALG00000010007	ENSGALT00000016256	EAPP	Function unknown	e2F-associated phosphoprotein	T91P, R165K,	--
ENSGALG00000010013	ENSGALT00000016263	EDNRA	Intracellular trafficking, secretion, and vesicular transport	endothelin receptor type A	G34R,	--
ENSGALG00000010014	ENSGALT00000016264	CRIPT	Cytoskeleton	cysteine-rich PDZ-binding protein	T12M,	--
ENSGALG00000010016	ENSGALT00000016269	SOCS5	Signal transduction mechanisms	suppressor of cytokine signaling	S20G, T84S, E139D,	--
ENSGALG00000010018	ENSGALT00000016271		Function unknown	cathepsin	A79V,	--
ENSGALG00000010020	ENSGALT00000016274	TTC7A	Signal transduction mechanisms	tetratricopeptide repeat domain	I548L,	--
ENSGALG00000010022	ENSGALT00000016278	PRMT9	Secondary metabolites biosynthesis, transport and catabolism	methyltransferase	Q83H, K178T, Q321R, A340G, N496S, N569H,	--
ENSGALG00000010025	ENSGALT00000016282	SNX6	Intracellular trafficking, secretion, and vesicular transport	sorting nexin	L173V,	--
ENSGALG00000010029	ENSGALT00000016288	BEST3	Function unknown	bestrophin	P508A, P548S, H586Q, N589S, P612S, D615G, T618A,	--
ENSGALG00000019352	ENSGALT00000016304	MYRFL	Function unknown	Open reading frame	T471A, V708D, S829G, N896D,	--
ENSGALG00000010039	ENSGALT00000016306	BRE	Transcription	Component of the BRCA1-A complex, a complex that specifically recognizes 'Lys-63'-linked ubiquitinated histones H2A and H2AX at DNA lesions sites, leading to target the brca1-bard1 heterodimer to sites of DNA damage at double-strand breaks (DSBs). The BRCA1-A complex also possesses deubiquitinase activity that specifically removes 'Lys-63'-linked ubiquitin on histones H2A and H2AX. In the BRCA1-A…	E198D,	--
ENSGALG00000010048	ENSGALT00000016329	SUPT7L	Function unknown	Suppressor of Ty 7 (S. cerevisiae)-like	S136R, E351D,	--
ENSGALG00000010051	ENSGALT00000016332		Coenzyme transport and metabolism	Catalyzes, together with MoaC, the conversion of 5'-GTP to cyclic pyranopterin monophosphate (cPMP or molybdopterin precursor Z) (By similarity)	I180V, K201R,	--
ENSGALG00000010074	ENSGALT00000016376		Replication, recombination and repair	lysine (K)-specific demethylase	E199Q, L222P, S264N, P445A,	--
ENSGALG00000010079	ENSGALT00000016382	HP1BP3	General function prediction only	Heterochromatin protein 1, binding protein 3	N46S,	--
ENSGALG00000010089	ENSGALT00000016408	DPH2	Translation, ribosomal structure and biogenesis	diphthamide biosynthesis protein	R131H, E163K,	--
ENSGALG00000010091	ENSGALT00000016414	ATP6V0B	Energy production and conversion	F(1)F(0) ATP synthase produces ATP from ADP in the presence of a proton or sodium gradient. F-type ATPases consist of two structural domains, F(1) containing the extramembraneous catalytic core and F(0) containing the membrane proton channel, linked together by a central stalk and a peripheral stalk. During catalysis, ATP synthesis in the catalytic domain of F(1) is coupled via a rotary mechanism…	V121D,	--
ENSGALG00000010096	ENSGALT00000016420	MBIP	General function prediction only	MAP3K12 binding inhibitory protein 1	L74P,	--
ENSGALG00000010097	ENSGALT00000016422	GATB	Translation, ribosomal structure and biogenesis	Allows the formation of correctly charged Asn-tRNA(Asn) or Gln-tRNA(Gln) through the transamidation of misacylated Asp- tRNA(Asn) or Glu-tRNA(Gln) in organisms which lack either or both of asparaginyl-tRNA or glutaminyl-tRNA synthetases. The reaction takes place in the presence of glutamine and ATP through an activated phospho-Asp-tRNA(Asn) or phospho-Glu-tRNA(Gln) (By similarity)	I272M,	--
ENSGALG00000010117	ENSGALT00000016457	SLC25A21	Posttranslational modification, protein turnover, chaperones	solute carrier family 25 (mitochondrial oxoadipate carrier), member 21	I166V, N170S, L255F,	L255F,
ENSGALG00000010127	ENSGALT00000016469	GLO1	General function prediction only	Lactoylglutathione lyase	V160I,	--
ENSGALG00000010136	ENSGALT00000016483	HGSNAT	Function unknown	heparan-alpha-glucosaminide n-acetyltransferase	S207A, I278V, R613K,	--
ENSGALG00000010145	ENSGALT00000016494	MDGA1	General function prediction only	MAM domain containing glycosylphosphatidylinositol anchor 1	R317G, R319H, L549M, P723L,	--
ENSGALG00000010148	ENSGALT00000016498		Signal transduction mechanisms	protein tyrosine phosphatase	V410I,	--
ENSGALG00000010151	ENSGALT00000016501	CCDC167	Function unknown	coiled-coil domain containing 167	V68A,	--
ENSGALG00000010167	ENSGALT00000016532	PNN	Cytoskeleton	Pinin, desmosome associated protein	E459D, V485M,	--
ENSGALG00000010170	ENSGALT00000016536	INTU	General function prediction only	inturned planar cell polarity effector homolog (Drosophila)	Q306H,	--
ENSGALG00000010177	ENSGALT00000016545	ZFC3H1	Function unknown	zinc finger, C3H1-type containing	N247S, S410T, T821S, T1229S, A1346T, A1503T, I1507M, I1508L, V1535I, D1590E,	--
ENSGALG00000010178	ENSGALT00000016546	PUM3	Function unknown	Domain-Containing protein	A357S, I451V, I630V,	--
ENSGALG00000010185	ENSGALT00000016555	HSPA4L	Posttranslational modification, protein turnover, chaperones	heat shock protein 70	H448D, H450R, N520S, P836S,	--
ENSGALG00000010190	ENSGALT00000016566	TBC1D15	Signal transduction mechanisms	TBC1 domain family member	G327V, Q639P,	--
ENSGALG00000010195	ENSGALT00000016572	PLK4	Cell cycle control, cell division, chromosome partitioning	Polo-like kinase 4	F294L, I322M, V846D, N882S,	--
ENSGALG00000010196	ENSGALT00000016575	FAM161B	Function unknown	family with sequence similarity 161, member B	K131Q, D289E, R327Q, S503T,	--
ENSGALG00000010197	ENSGALT00000016576	COQ6	Energy production and conversion ,Coenzyme transport and metabolism ,	Monooxygenase	V190A, M331V, V346M,	--
ENSGALG00000010199	ENSGALT00000016578	MFSD8	Carbohydrate transport and metabolism	Major facilitator superfamily domain containing 8	Q139R,	--
ENSGALG00000010201	ENSGALT00000016584	ABHD18	Function unknown	chromosome 4 open reading frame 29	L352S,	--
ENSGALG00000010214	ENSGALT00000016607	JADE1	General function prediction only	PHD finger protein	M551V, A635T,	--
ENSGALG00000010227	ENSGALT00000016625	KRR1	General function prediction only	Required for 40S ribosome biogenesis. Involved in nucleolar processing of pre-18S ribosomal RNA and ribosome assembly (By similarity)	K306R,	--
ENSGALG00000010229	ENSGALT00000016629	ABCD4	General function prediction only	(ABC) transporter	G598E,	--
ENSGALG00000010233	ENSGALT00000016634	SYNDIG1L	Intracellular trafficking, secretion, and vesicular transport	proline-rich transmembrane protein 1	S110N,	--
ENSGALG00000010234	ENSGALT00000016635	MMACHC	Function unknown	Methylmalonic aciduria (Cobalamin deficiency) cblC type, with homocystinuria	F228L,	--
ENSGALG00000010243	ENSGALT00000016648	PRDX1	Posttranslational modification, protein turnover, chaperones	alkyl hydroperoxide reductase	K109N, A113S,	--
ENSGALG00000010275	ENSGALT00000016710	FCF1	General function prediction only	small subunit (SSU) processome component, homolog	H68Y,	--
ENSGALG00000010279	ENSGALT00000016717	TMEM69	Function unknown	transmembrane protein 69	N158D, L194V, K217T,	--
ENSGALG00000010287	ENSGALT00000016739	IPP	Signal transduction mechanisms	Intracisternal A particle-promoted polypeptide	M590V,	--
ENSGALG00000010303	ENSGALT00000016762		General function prediction only	Alpha beta hydrolase	D373N,	--
ENSGALG00000010314	ENSGALT00000016792	NEK9	Cell cycle control, cell division, chromosome partitioning ,Cytoskeleton ,	regulator of chromosome condensation	M163T, A893T,	--
ENSGALG00000010331	ENSGALT00000016815	MME	Posttranslational modification, protein turnover, chaperones	endothelin-converting enzyme	T186A, S568A,	--
ENSGALG00000010343	ENSGALT00000016840	TSPAN1	Function unknown	Tetraspanin family	I66V,	--
ENSGALG00000010347	ENSGALT00000016846	CCNG2	Cell cycle control, cell division, chromosome partitioning	cyclin G2	C43G,	--
ENSGALG00000010357	ENSGALT00000016864	P2RY1	Signal transduction mechanisms	purinergic receptor P2Y, G-protein coupled 1	K342R,	--
ENSGALG00000010363	ENSGALT00000016878	HERC3	Posttranslational modification, protein turnover, chaperones	e3 ubiquitin protein ligase	Q26R,	--
ENSGALG00000010372	ENSGALT00000016899	ANGEL1	RNA processing and modification	Ccr4-NOT transcription complex, subunit	N279S,	--
ENSGALG00000010377	ENSGALT00000016905	GPR87	Intracellular trafficking, secretion, and vesicular transport	G protein-coupled receptor 87	A286T,	--
ENSGALG00000010391	ENSGALT00000016922	MMRN1	Signal transduction mechanisms	multimerin 1	S296R, E391D, L396I, M426V, K446E, V460A, Q489L, S535N, G550R, G661A, D700H, L715R, V721E, Q738R, D812N, G940E, S993T, T997I, D1047S, L1050P,	--
ENSGALG00000010390	ENSGALT00000016923		Function unknown	kiaa1737	N44S, T278A,	--
ENSGALG00000010392	ENSGALT00000016925		Function unknown		H405Y,	--
ENSGALG00000010402	ENSGALT00000016938	HPGDS	Posttranslational modification, protein turnover, chaperones	glutathione Stransferase	S162T,	--
ENSGALG00000010433	ENSGALT00000016989	FAAH	Lipid transport and metabolism ,Translation, ribosomal structure and biogenesis ,Signal transduction mechanisms ,	Fatty acid amide hydrolase	L404F,	--
ENSGALG00000010435	ENSGALT00000016992	RASGRP3	General function prediction only	RAS guanyl releasing protein 3 (calcium and DAG-regulated)	A643T,	--
ENSGALG00000010440	ENSGALT00000016998	MKNK1	Signal transduction mechanisms	MAP kinase interacting serine threonine kinase	A408T,	--
ENSGALG00000010463	ENSGALT00000017033	AHSA1	Function unknown	AHA1, activator of heat shock 90kDa protein ATPase homolog 1	V229I,	--
ENSGALG00000010486	ENSGALT00000017075		Function unknown	janus kinase and microtubule interacting protein 3	L356Q,	--
ENSGALG00000010497	ENSGALT00000017094	SLC29A4	General function prediction only	solute carrier family 29 (nucleoside transporters), member 4	R293H,	--
ENSGALG00000018503	ENSGALT00000017098		Transcription	NK6 homeobox 3	E216D,	--
ENSGALG00000010504	ENSGALT00000017107	ADCK1	General function prediction only	AarF domain containing kinase	A272V, A510V,	--
ENSGALG00000010505	ENSGALT00000017109	BEND5	General function prediction only	BEN domain containing 5	E163D, I257V,	--
ENSGALG00000010518	ENSGALT00000017123	NRXN3	Signal transduction mechanisms	Neurexin	Q54H, Q192R, A226D, Y229H,	--
ENSGALG00000010538	ENSGALT00000017153	TTC27	General function prediction only	tetratricopeptide repeat protein	I66M, H137C, R526H, T824M,	--
ENSGALG00000010542	ENSGALT00000017158	PAPSS1	Inorganic ion transport and metabolism	Catalyzes the synthesis of activated sulfate (By similarity)	M22T, E409D, M466I, H580R,	--
ENSGALG00000010547	ENSGALT00000017165	YIPF4	Intracellular trafficking, secretion, and vesicular transport	Yip1 domain family, member 4	V198M, L205V,	--
ENSGALG00000010554	ENSGALT00000017174		Function unknown	family with sequence similarity 82, member	A138T, D163E, V191L,	--
ENSGALG00000010555	ENSGALT00000017177	OSBPL9	Signal transduction mechanisms	Oxysterol-binding protein	I605V, C767W, I778M,	--
ENSGALG00000010564	ENSGALT00000017190	TBCK	Signal transduction mechanisms	TBC1 domain containing kinase	L187V,	--
ENSGALG00000010572	ENSGALT00000017205	TSHR	Intracellular trafficking, secretion, and vesicular transport	hormone receptor	N96S, S724G,	--
ENSGALG00000010579	ENSGALT00000017215	STON2	Function unknown	stonin 2	P238H, K262Q, M397I, K496R, R635Q,	--
ENSGALG00000010580	ENSGALT00000017218	STRN	General function prediction only	Striatin, calmodulin binding protein	G231S,	--
ENSGALG00000010581	ENSGALT00000017221	SEL1L	General function prediction only	Sel1 domain protein repeat-containing protein	N400S,	--
ENSGALG00000010583	ENSGALT00000017224	VIT	Defense mechanisms ,Extracellular structures ,	positive regulation of cell-substrate adhesion	P207S, I404L,	--
ENSGALG00000010589	ENSGALT00000017230	FLRT2	Function unknown	Fibronectin leucine rich transmembrane protein 2	K277R, D414H, R417K,	--
ENSGALG00000010593	ENSGALT00000017238	GALC	Carbohydrate transport and metabolism	galactosylceramidase	K561R,	--
ENSGALG00000010595	ENSGALT00000017244	GPR65	Intracellular trafficking, secretion, and vesicular transport	G protein-coupled receptor 65	R45K, L117V,	--
ENSGALG00000010596	ENSGALT00000017246	TACR3	Intracellular trafficking, secretion, and vesicular transport	Tachykinin receptor	A31V, I114V, K198T,	--
ENSGALG00000010609	ENSGALT00000017260	NDUFAF7	Function unknown	NADH dehydrogenase ubiquinone complex I, assembly factor 7	H152R,	--
ENSGALG00000010610	ENSGALT00000017263	SNX25	Function unknown	sorting nexin 25	K173R,	--
ENSGALG00000010612	ENSGALT00000017268	PRKD3	Signal transduction mechanisms	serine threonine-protein kinase d	D304G,	--
ENSGALG00000010613	ENSGALT00000017269	ZFYVE9	General function prediction only	Zinc finger, FYVE domain containing 9	D221E, M388T, T457A, N600S, A864T, Y948D,	--
ENSGALG00000010618	ENSGALT00000017275	SLC30A6	Inorganic ion transport and metabolism	Solute carrier family 30 (Zinc transporter), member 6	V446A,	--
ENSGALG00000010645	ENSGALT00000017317	ENPP6	General function prediction only	type i phosphodiesterase nucleotide pyrophosphatase	V97L, A163V,	--
ENSGALG00000010649	ENSGALT00000017325		Intracellular trafficking, secretion, and vesicular transport	consortin, connexin sorting protein	D133G, N161S, A213T, D227N, R263Q, M331L,	--
ENSGALG00000010652	ENSGALT00000017326	SCP2	Lipid transport and metabolism	Sterol carrier protein 2	K277E,	--
ENSGALG00000010651	ENSGALT00000017328		Transcription	transcription factor B2, mitochondrial	D159N, V214I,	--
ENSGALG00000021869	ENSGALT00000017329	PODN	General function prediction only	Podocan-like 1	S278N, N513S,	--
ENSGALG00000010654	ENSGALT00000017333	TRAPPC11	Function unknown	trafficking protein particle complex 11	L517S, A560V, V1000A, G1070D,	L517S, V1000A, G1070D,
ENSGALG00000010658	ENSGALT00000017342	RWDD4	General function prediction only	RWD domain containing 4	D133G,	--
ENSGALG00000010662	ENSGALT00000017347		Function unknown	Claudin 22	F121L, H198R,	--
ENSGALG00000010664	ENSGALT00000017350	KIF26B	Cytoskeleton	Kinesin family member	G499S, P975T, A1307T, D1415N, I1441T, G1494R, S1497A, H1552N,	--
ENSGALG00000010668	ENSGALT00000017356	WWC2	Posttranslational modification, protein turnover, chaperones	e3 ubiquitin protein ligase	R279K, I290V, T467M, I477V, A685T, S840P,	--
ENSGALG00000010677	ENSGALT00000017369	NRDE2	Function unknown	nrde-2 necessary for RNA interference, domain containing	N231S, D251A, I301V, D331V, I654V, N683S, I844V, E850D, C937G, T1081A,	--
ENSGALG00000010692	ENSGALT00000017391	LRP8	Signal transduction mechanisms	Low density lipoprotein receptor-related protein	S490R, T765A,	--
ENSGALG00000010702	ENSGALT00000017407	ADSS	Nucleotide transport and metabolism	Plays an important role in the de novo pathway of purine nucleotide biosynthesis	D328E,	--
ENSGALG00000010703	ENSGALT00000017411	C14orf159	Function unknown	UPF0317 protein	S27N, K108R, I160V, S177C, E191A, C232S, V290A, A333S, V493L,	--
ENSGALG00000010708	ENSGALT00000017422	ICA1	Signal transduction mechanisms	Islet cell autoantigen	F88V, M405T,	--
ENSGALG00000010716	ENSGALT00000017440	AGA	Amino acid transport and metabolism	asparaginase	N202S, Q293R, V342I,	--
ENSGALG00000010718	ENSGALT00000017442	THSD7A	General function prediction only	thrombospondin, type I, domain containing	S400R, P779S, T926I, P1309S,	--
ENSGALG00000010733	ENSGALT00000017461	CEP170	Signal transduction mechanisms	Centrosomal protein 170kDa	M204T, T207M, T301A, K419E, T837I,	--
ENSGALG00000010738	ENSGALT00000017475	TC2N	General function prediction only	tandem C2 domains, nuclear	E31Q, A96G, D212G, T412I, N462S,	--
ENSGALG00000010743	ENSGALT00000017480	LRRC42	Function unknown	Leucine rich repeat containing 42	S201W, T411S,	--
ENSGALG00000010746	ENSGALT00000017484	TMEM59	Intracellular trafficking, secretion, and vesicular transport	Transmembrane protein 59	S216G,	--
ENSGALG00000010747	ENSGALT00000017485	FBLN5	Posttranslational modification, protein turnover, chaperones	Fibulin 5	P90Q,	--
ENSGALG00000010748	ENSGALT00000017486	EXO1	Replication, recombination and repair	Structure-specific nuclease with 5'-flap endonuclease and 5'-3' exonuclease activities involved in DNA replication and repair. During DNA replication, cleaves the 5'-overhanging flap structure that is generated by displacement synthesis when DNA polymerase encounters the 5'-end of a downstream Okazaki fragment. It enters the flap from the 5'-end and then tracks to cleave the flap base, leaving a …	Q4H, G464W, G578E,	G464W,
ENSGALG00000010749	ENSGALT00000017487	TCEANC2	Transcription	transcription elongation factor A (SII) N-terminal and central domain containing 2	V199I,	--
ENSGALG00000010763	ENSGALT00000017502	TRIP11	Signal transduction mechanisms	thyroid hormone receptor interactor 11	I349L, Q476R, V845A,	--
ENSGALG00000010770	ENSGALT00000017516	SCIN	Intracellular trafficking, secretion, and vesicular transport	Ca(2 )-dependent actin filament-severing protein that is presumed to have a regulatory function in exocytosis by affecting the organization of the microfilament network underneath the plasma membrane. In vitro, also has barbed end capping and nucleating activities in the presence of Ca(2 ). Regulates chondrocyte proliferation and differentiation. MAP kinases p38 and ERK1 2 mediate the adseverin-i…	P44T, S419G, G420D, T620A, N726S,	--
ENSGALG00000010778	ENSGALT00000017530	CHRM3	Signal transduction mechanisms	Cholinergic receptor, muscarinic	L51P, S87G, D267H, I278V, I297V,	--
ENSGALG00000010783	ENSGALT00000017538	CPSF2	Translation, ribosomal structure and biogenesis	cleavage and polyadenylation	A425V,	--
ENSGALG00000010795	ENSGALT00000017557	ISPD	Lipid transport and metabolism	Catalyzes the formation of 4-diphosphocytidyl-2-C- methyl-D-erythritol from CTP and 2-C-methyl-D-erythritol 4- phosphate (MEP) (By similarity)	E71G, R153C, D189N, L359V,	R153C,
ENSGALG00000010798	ENSGALT00000017560	DHCR24	Energy production and conversion	FAD linked oxidase domain protein	K232Q,	--
ENSGALG00000010804	ENSGALT00000017566	ANKMY2	General function prediction only	Ankyrin repeat and MYND domain containing 2	F235I, E391Q, Q456R,	--
ENSGALG00000010811	ENSGALT00000017577	LGMN	Posttranslational modification, protein turnover, chaperones	phosphatidylinositol glycan anchor biosynthesis, class K	Y174H, K329M,	--
ENSGALG00000010813	ENSGALT00000017584	GOLGA5	Intracellular trafficking, secretion, and vesicular transport	golgin A5	K169R, S173I, V189I, S490N, M525I,	--
ENSGALG00000014464	ENSGALT00000017613	MTR	Amino acid transport and metabolism	5-methyltetrahydrofolate-homocysteine methyltransferase	D16H, C273S, Q693R,	--
ENSGALG00000010847	ENSGALT00000017629	VEGFC	Signal transduction mechanisms	vascular endothelial growth factor c	T233A, T272M, R299Q, K307Q,	--
ENSGALG00000010850	ENSGALT00000017633	C8A	Function unknown	Complement component 8, alpha polypeptide	Q69H, D427A,	Q69H, D427A,
ENSGALG00000010855	ENSGALT00000017642	MTHFD2L	Coenzyme transport and metabolism	Catalyzes the oxidation of 5,10- methylenetetrahydrofolate to 5,10-methenyltetrahydrofolate and then the hydrolysis of 5,10-methenyltetrahydrofolate to 10- formyltetrahydrofolate (By similarity)	R64K,	--
ENSGALG00000010858	ENSGALT00000017651	LRP2	Intracellular trafficking, secretion, and vesicular transport	Low density lipoprotein receptor-related protein	K172N, P295S, I1082V, F1095L, P1225A, L1614V, V2038I, I2191V, S2306N, I2590V, R2948H, L3697Q, I4182V, T4267A,	--
ENSGALG00000010861	ENSGALT00000017659	OMA1	Posttranslational modification, protein turnover, chaperones	Protease HtpX homolog	I310V, K388R, K415S,	--
ENSGALG00000010862	ENSGALT00000017660	FERD3L	Function unknown	Fer3-like (Drosophila)	P62L, D65N, L68Q, G84R,	--
ENSGALG00000010868	ENSGALT00000017667	MACC1	Function unknown	metastasis associated in colon cancer 1	D801E,	--
ENSGALG00000010875	ENSGALT00000017677	ITGB8	Intracellular trafficking, secretion, and vesicular transport	integrin beta 8	I109T, T436A, G444A, A469V, K572Q,	--
ENSGALG00000010889	ENSGALT00000017699	HOOK1	Cytoskeleton	Hook homolog 1 (Drosophila)	V238M,	--
ENSGALG00000010891	ENSGALT00000017711	ABCB11	Defense mechanisms	(ABC) transporter	I612V, L622V, E689A,	--
ENSGALG00000010899	ENSGALT00000017723	G6PC2	Lipid transport and metabolism	glucose-6-phosphatase, catalytic, 2	I33V, L172I,	L172I,
ENSGALG00000010900	ENSGALT00000017724	SPC25	Function unknown	SPC25, NDC80 kinetochore complex component, homolog (S. cerevisiae)	E14K, R40T, N97K, E99K,	--
ENSGALG00000010909	ENSGALT00000017742	PRKG2	Signal transduction mechanisms	Protein kinase, cGMP-dependent, type	F232L, L303F, H356Y, A375S, D580E,	--
ENSGALG00000010938	ENSGALT00000017800	KLHL7	Posttranslational modification, protein turnover, chaperones	Kelch-like 7 (Drosophila)	I47V,	--
ENSGALG00000010949	ENSGALT00000017821	GPNMB	Function unknown	glycoprotein (transmembrane) nmb	Q44E, N149S, H150Y, N196S, A223T, I266V, L401V,	--
ENSGALG00000010950	ENSGALT00000017823	PPP4R4	Signal transduction mechanisms	protein phosphatase 4, regulatory subunit 4	V192I, I208M, V257I, N428S, I534V, M594I, A684T, N793K,	--
ENSGALG00000010957	ENSGALT00000017833	USP1	Posttranslational modification, protein turnover, chaperones	ubiquitin specific peptidase 1	N278Y, E319D, A327P, K425E,	--
ENSGALG00000010960	ENSGALT00000017839	GALNT3	Intracellular trafficking, secretion, and vesicular transport	UDP-N-acetyl-alpha-D-galactosamine polypeptide N-acetylgalactosaminyltransferase 3 (GalNAc-T3)	F22V, V42I, H95R, T185S, E237D,	--
ENSGALG00000020391	ENSGALT00000017868	SERPINA10	Posttranslational modification, protein turnover, chaperones	Serpin peptidase inhibitor, clade	K325E, F424L,	--
ENSGALG00000010976	ENSGALT00000017882	CCDC126	Function unknown	coiled-coil domain containing 126	N137S,	--
ENSGALG00000010979	ENSGALT00000017886		Lipid transport and metabolism ,Secondary metabolites biosynthesis, transport and catabolism ,	short-chain dehydrogenase reductase	C186W,	--
ENSGALG00000010991	ENSGALT00000017901	ALG6	Function unknown	asparagine-linked glycosylation 6, alpha-1,3-glucosyltransferase homolog (S. cerevisiae)	Y428C, F432L, I438V, I493M,	--
ENSGALG00000010997	ENSGALT00000017908	DFNA5	General function prediction only	Deafness, autosomal dominant 5	I148M, S286G, R316K, Q379R,	--
ENSGALG00000010998	ENSGALT00000017909	EFCAB7	General function prediction only	EF-hand calcium binding domain 7	Q270L, R298S, S317C, N333S, L408S,	--
ENSGALG00000011069	ENSGALT00000018023	FIGN	Posttranslational modification, protein turnover, chaperones	Aaa atpase	A126T,	--
ENSGALG00000011080	ENSGALT00000018052	BDKRB2	Intracellular trafficking, secretion, and vesicular transport	bradykinin receptor B2	I64V, L269F,	--
ENSGALG00000011091	ENSGALT00000018070	NUP133	Intracellular trafficking, secretion, and vesicular transport ,Nuclear structure ,	Nucleoporin 133kDa	I32V, S114A, V180M, Q248R, Q253R, S366G, F370L, L381F, R665K, T859A, V970I, L1054F,	--
ENSGALG00000011114	ENSGALT00000018104	COG2	Intracellular trafficking, secretion, and vesicular transport	Component of oligomeric Golgi complex 2	S486P, I509V, L561I,	--
ENSGALG00000011117	ENSGALT00000018111	AGT	Posttranslational modification, protein turnover, chaperones	Serpin peptidase inhibitor, clade	L8F, Q112R, P149L, F213L, P276S, A345V, D413E, P418A, F444L,	--
ENSGALG00000011141	ENSGALT00000018170	ITGB6	Intracellular trafficking, secretion, and vesicular transport	integrin beta 6	G57E, K96M, S512N, D661G, E677K, T680I, T681S,	--
ENSGALG00000011153	ENSGALT00000018187	LY75	Signal transduction mechanisms ,Defense mechanisms ,	lymphocyte antigen 75	D38S, S140G, D304G, Q378R, V549L, I927V, K1463R, V1695A,	--
ENSGALG00000011162	ENSGALT00000018196	CYP46A1	Secondary metabolites biosynthesis, transport and catabolism	Cytochrome p450	T374I, T479S,	--
ENSGALG00000011163	ENSGALT00000018198	GNPAT	Lipid transport and metabolism	glycerol3phosphate acyltransferase	Q200R, R280K,	--
ENSGALG00000011166	ENSGALT00000018206		Signal transduction mechanisms	protein kinase domain-containing protein, cytoplasmic-like	V201I,	--
ENSGALG00000011168	ENSGALT00000018208	C12orf29	Function unknown	chromosome 12 open reading frame 29	Q233R,	--
ENSGALG00000011174	ENSGALT00000018217	PSMB1	Posttranslational modification, protein turnover, chaperones	The proteasome is a multicatalytic proteinase complex which is characterized by its ability to cleave peptides with Arg, Phe, Tyr, Leu, and Glu adjacent to the leaving group at neutral or slightly basic pH. The proteasome has an ATP-dependent proteolytic activity (By similarity)	V75I, A144V,	--
ENSGALG00000011175	ENSGALT00000018218	TMEM150C	Function unknown	Transmembrane protein 150C	Y181D,	--
ENSGALG00000011185	ENSGALT00000018238	PLEKHA8	Intracellular trafficking, secretion, and vesicular transport	Pleckstrin homology domain containing, family A (Phosphoinositide binding specific) member 8	V142I,	--
ENSGALG00000011203	ENSGALT00000018267	HPSE	Carbohydrate transport and metabolism	Glycosyl hydrolase family 79, N-terminal domain	V306I, A376S,	--
ENSGALG00000011206	ENSGALT00000018268	KITLG	Intracellular trafficking, secretion, and vesicular transport	kit ligand	T207A, Q279R,	Q279R,
ENSGALG00000011208	ENSGALT00000018274		Replication, recombination and repair	helicase	S91G, K155E, E331G, Y402F,	--
ENSGALG00000011211	ENSGALT00000018282	HACL1	Amino acid transport and metabolism ,Coenzyme transport and metabolism ,	2-hydroxyacyl-CoA lyase 1	D288G, I296V, E559V,	--
ENSGALG00000011216	ENSGALT00000018291	BTD	General function prediction only	Biotinidase	I270V, N331T, S341G, N494D,	--
ENSGALG00000011221	ENSGALT00000018298	AGPAT9	Lipid transport and metabolism	1-acylglycerol-3-phosphate O-acyltransferase 6 (lysophosphatidic acid acyltransferase, zeta)	G437A,	--
ENSGALG00000011228	ENSGALT00000018316	WARS	Translation, ribosomal structure and biogenesis	tryptophanyltRNA synthetase	V108G,	--
ENSGALG00000011238	ENSGALT00000018328	WLS	Intracellular trafficking, secretion, and vesicular transport	A segment polarity gene required for wingless (wg)- dependent patterning processes, acting in both wg-sending cells and wg-target cells. In non-neuronal cells wls directs wg secretion. The wls traffic loop encompasses the Golgi, the cell surface, an endocytic compartment and a retrograde route leading back to the Golgi, and involves clathrin-mediated endocytosis and the retromer complex (a conser…	M46T,	--
ENSGALG00000011241	ENSGALT00000018331	RFTN1	Posttranslational modification, protein turnover, chaperones	raftlin lipid raft linker 1	N183S, V322I, S540L, P545H,	--
ENSGALG00000011244	ENSGALT00000018342	DLK1	Signal transduction mechanisms	Delta-like 1 homolog (Drosophila)	N153K, T206I,	--
ENSGALG00000011248	ENSGALT00000018348	PLCL2	Signal transduction mechanisms	phospholipase c	I540T, V773I,	--
ENSGALG00000011255	ENSGALT00000018364		Lipid transport and metabolism	carboxylase	L217V, I247M,	--
ENSGALG00000011269	ENSGALT00000018390	EPYC	General function prediction only	Epiphycan	A19S, L76M, A131S,	--
ENSGALG00000011274	ENSGALT00000018395	DCN	Posttranslational modification, protein turnover, chaperones	May affect the rate of fibrils formation	K103R,	--
ENSGALG00000011277	ENSGALT00000018401	PLEKHG7	Signal transduction mechanisms	pleckstrin homology domain containing, family G (with RhoGef domain) member 7	D164N, I250V,	--
ENSGALG00000011296	ENSGALT00000018427	FRMD1	Signal transduction mechanisms	FERM domain containing	V17I, R367Q,	--
ENSGALG00000011299	ENSGALT00000018431	KIF25	Cytoskeleton	Kinesin family member	A370T, R477Q,	--
ENSGALG00000011300	ENSGALT00000018432	TOP2B	Chromatin structure and dynamics	Control of topological states of DNA by transient breakage and subsequent rejoining of DNA strands. Topoisomerase II makes double-strand breaks (By similarity)	V1217I, A1370G, S1577A,	A1370G,
ENSGALG00000011304	ENSGALT00000018440	NGLY1	Posttranslational modification, protein turnover, chaperones	Specifically deglycosylates the denatured form of N- linked glycoproteins in the cytoplasm and assists their proteasome-mediated degradation. Cleaves the beta-aspartyl- glucosamine (GlcNAc) of the glycan and the amide side chain of Asn, converting Asn to Asp. Prefers proteins containing high- mannose over those bearing complex type oligosaccharides. Can recognize misfolded proteins in the endopla…	V236A, K292R, K632T, Y692C, F695L,	--
ENSGALG00000011327	ENSGALT00000018481	NR2C1	Transcription	nuclear receptor subfamily 2 group C member	L24F, N526T,	--
ENSGALG00000011341	ENSGALT00000018505	UNC93A	Function unknown	unc-93 homolog A (C. elegans)	A327G,	--
ENSGALG00000011340	ENSGALT00000018517	ZRANB2	General function prediction only	Zinc finger, RAN-binding domain containing 2	P138A, P312A,	--
ENSGALG00000011353	ENSGALT00000018524	TNNI3K	General function prediction only	Ankyrin Repeat	S258T,	--
ENSGALG00000011379	ENSGALT00000018563	SLC44A5	Inorganic ion transport and metabolism	Solute carrier family 44 member	I334V, I336V,	--
ENSGALG00000011386	ENSGALT00000018571	BCS1L	Posttranslational modification, protein turnover, chaperones	Acts as a processive, ATP-dependent zinc metallopeptidase for both cytoplasmic and membrane proteins. Plays a role in the quality control of integral membrane proteins (By similarity)	N297D,	--
ENSGALG00000011392	ENSGALT00000018582	MSH4	Replication, recombination and repair	that it carries out the mismatch recognition step. This protein has a weak ATPase activity (By similarity)	K332R, T458A,	--
ENSGALG00000011403	ENSGALT00000018600	SRP72	Intracellular trafficking, secretion, and vesicular transport	Signal-recognition-particle assembly has a crucial role in targeting secretory proteins to the rough endoplasmic reticulum membrane (By similarity)	A371S,	--
ENSGALG00000011414	ENSGALT00000018623	AMDHD1	Secondary metabolites biosynthesis, transport and catabolism	amidohydrolase	R26Q, K220R, M254V,	--
ENSGALG00000011428	ENSGALT00000018638	AZI2	Cytoskeleton	5-azacytidine induced 2	N156S, S176G, Q179K,	--
ENSGALG00000011432	ENSGALT00000018644	CDC42BPB	Signal transduction mechanisms	Serine Threonine protein kinase	S393T, L860Q, P980S, L1611Q, C1623S, S1625A, S1648G,	--
ENSGALG00000011443	ENSGALT00000018659		Intracellular trafficking, secretion, and vesicular transport	exocyst complex component 3-like 4	D167A, E235K, A299G, L384Q, T486A,	--
ENSGALG00000011446	ENSGALT00000018666	TNFAIP2	RNA processing and modification	Tumor necrosis factor alpha-induced protein	L345Q, S356T, D441E, F547S,	--
ENSGALG00000011447	ENSGALT00000018667	GADL1	Amino acid transport and metabolism	decarboxylase	H309Y, L403V,	--
ENSGALG00000011464	ENSGALT00000018692	EIF5	Translation, ribosomal structure and biogenesis	translation Initiation Factor	S257A, R370H,	--
ENSGALG00000011475	ENSGALT00000018709		Chromatin structure and dynamics	Swi SNF related matrix associated, actin dependent regulator of chromatin, subfamily a-like 1	T67S, N78K, I145V, Q237H, L536F, A538V,	--
ENSGALG00000011481	ENSGALT00000018718	GPD1L	Energy production and conversion	glycerol-3-phosphate dehydrogenase	L320V,	--
ENSGALG00000011484	ENSGALT00000018721	CMTM8	Function unknown	CKLF-like MARVEL transmembrane domain containing 8	T137S,	--
ENSGALG00000011489	ENSGALT00000018726	T	Transcription	T, brachyury homolog (mouse)	L242V,	--
ENSGALG00000011492	ENSGALT00000018729	XRCC5	Replication, recombination and repair	X-ray repair complementing defective repair in Chinese hamster cells 5	V94L, E130G, Q287L, V342I, V501I, C557R,	--
ENSGALG00000011494	ENSGALT00000018731	CNOT10	Transcription	CCR4-NOT transcription complex subunit 10	S192P,	--
ENSGALG00000011498	ENSGALT00000018736	TCAIM	Function unknown	T cell activation inhibitor, mitochondrial	E93D, S104G, K172R, A277T, E408A,	--
ENSGALG00000011499	ENSGALT00000018738	SCARB2	Intracellular trafficking, secretion, and vesicular transport	scavenger receptor class B, member	I404V, I454V, I479V,	--
ENSGALG00000011522	ENSGALT00000018785	TRMT61A	Translation, ribosomal structure and biogenesis	TRNA methyltransferase	I233V,	--
ENSGALG00000011537	ENSGALT00000018810	PDE10A	Signal transduction mechanisms	Phosphodiesterase	C459R,	--
ENSGALG00000011543	ENSGALT00000018826	SDAD1	Intracellular trafficking, secretion, and vesicular transport	SDA1 domain containing 1	H68Q, P279A, D626N,	--
ENSGALG00000011565	ENSGALT00000018863	TDRD9	Replication, recombination and repair	helicase	E67H, N97D, L251V, A409T, G526A, E624Q, L718F, R766K, I777M, L784I, V804I, E807G, T825S, V857A, L905F, R1137G, N1151D,	--
ENSGALG00000011569	ENSGALT00000018870	SCYL2	Signal transduction mechanisms	SCY1-like 2 (S. cerevisiae)	S622G, G725A,	--
ENSGALG00000011571	ENSGALT00000018874	AGPAT4	Lipid transport and metabolism	1-acylglycerol-3-phosphate O-acyltransferase 4 (lysophosphatidic acid acyltransferase, delta)	N42D, Q374K,	--
ENSGALG00000011572	ENSGALT00000018877	ASPG	General function prediction only	Ankyrin Repeat	T336K, K505Q, I533M,	--
ENSGALG00000011577	ENSGALT00000018885	CNTNAP5	Signal transduction mechanisms	contactin associated protein-like	H476Y, N670S,	--
ENSGALG00000011579	ENSGALT00000018900		Carbohydrate transport and metabolism	solute carrier family 22	H316C,	--
ENSGALG00000020002	ENSGALT00000018901	SLC22A3	General function prediction only	solute carrier family 22	V410M, G474A,	--
ENSGALG00000011590	ENSGALT00000018923	TMEM179	Function unknown	Transmembrane protein 179	A114V,	--
ENSGALG00000011614	ENSGALT00000018969	ANO4	Intracellular trafficking, secretion, and vesicular transport	Anoctamin	P676R,	--
ENSGALG00000011622	ENSGALT00000018987		Signal transduction mechanisms	MAS1 oncogene	M164T,	--
ENSGALG00000011633	ENSGALT00000019001	SLC5A8	Amino acid transport and metabolism	symporter	T289M, I452L, L519I,	--
ENSGALG00000011643	ENSGALT00000019028	UTP20	Function unknown	UTP20, small subunit (SSU) processome component, homolog (yeast)	A603V, K913R, T1216I, V1284M, S1613T, V1825A, P2062R,	--
ENSGALG00000011646	ENSGALT00000019035	PLD4	Lipid transport and metabolism	PhosphoLipase D family member	Y73F, I181V,	--
ENSGALG00000011660	ENSGALT00000019061	WTAP	General function prediction only	wilms tumor 1 associated protein	M370V,	--
ENSGALG00000011661	ENSGALT00000019062	SOD2	Inorganic ion transport and metabolism	Destroys radicals which are normally produced within the cells and which are toxic to biological systems (By similarity)	I163V,	--
ENSGALG00000011677	ENSGALT00000019085	HSPBAP1	Chromatin structure and dynamics ,Signal transduction mechanisms ,	HSPB (Heat shock 27kDa) associated protein 1	Y115H, I157V, E224K,	--
ENSGALG00000011681	ENSGALT00000019095	DEPDC7	General function prediction only	DEP domain containing	K378R,	--
ENSGALG00000011695	ENSGALT00000019117	HIPK3	Signal transduction mechanisms	Homeodomain interacting protein kinase	S616G,	--
ENSGALG00000011717	ENSGALT00000019146		Nucleotide transport and metabolism	permease	F218Y, G379C,	--
ENSGALG00000011762	ENSGALT00000019202	UBA6	Coenzyme transport and metabolism	UBA THIF-type NAD FAD binding protein	H32R, I326L, Q353R,	--
ENSGALG00000011770	ENSGALT00000019216	UMPS	Nucleotide transport and metabolism	Catalyzes the decarboxylation of orotidine 5'- monophosphate (OMP) to uridine 5'-monophosphate (UMP) (By similarity)	T116A, I180V, N424S, S473A,	--
ENSGALG00000011784	ENSGALT00000019230	APOLD1	Intracellular trafficking, secretion, and vesicular transport	Apolipoprotein L domain containing 1	T208S,	--
ENSGALG00000011794	ENSGALT00000019245	DDX47	RNA processing and modification	DEAD (Asp-Glu-Ala-Asp) box polypeptide 47	Y257H,	--
ENSGALG00000011797	ENSGALT00000019249	MTHFD1	Nucleotide transport and metabolism	formyltetrahydrofolate synthetase	N516T, Y687C,	--
ENSGALG00000011801	ENSGALT00000019259	ESR2	Transcription	Estrogen receptor 2 (ER beta)	L34F, V71M,	--
ENSGALG00000011805	ENSGALT00000019266		Energy production and conversion ,Carbohydrate transport and metabolism ,	glycosyltransferase	N99S, F265L, V324L, L329F, S330N, I508V,	--
ENSGALG00000011809	ENSGALT00000019272		Intracellular trafficking, secretion, and vesicular transport	glutamate receptor, ionotropic, n-methyl d-aspartate	G611V, T666S,	--
ENSGALG00000011814	ENSGALT00000019288	ATF7IP	Transcription	Activating transcription factor 7 interacting protein	T109N, V198A, S266G, S332P, E336G, N483S, T652A, S665T, A758V, N759S,	--
ENSGALG00000011831	ENSGALT00000019307	ANKRD50	General function prediction only	Ankyrin Repeat	V180I,	--
ENSGALG00000011834	ENSGALT00000019311	NUDT6	Replication, recombination and repair	nudix (nucleoside diphosphate linked moiety X)-type motif 6	T215S,	--
ENSGALG00000011838	ENSGALT00000019319	GUCY2C	Signal transduction mechanisms	Guanylate Cyclase	E482D, N623S,	--
ENSGALG00000011847	ENSGALT00000019330	TTC26	Function unknown	tetratricopeptide repeat domain 26	R21K, A44T,	--
ENSGALG00000011861	ENSGALT00000019349	SYT16	General function prediction only	synaptotagmin XVI	S397N, D479G,	D479G,
ENSGALG00000011867	ENSGALT00000019361	SERHL2	General function prediction only	Hydrolase	A180V,	--
ENSGALG00000011868	ENSGALT00000019362	SNAPC1	Transcription	Small nuclear RNA activating complex, polypeptide 1, 43kDa	N245D,	--
ENSGALG00000011870	ENSGALT00000019364	HIF1A	Transcription	Hypoxia inducible factor 1, alpha subunit (Basic helix-loop-helix transcription factor)	P478S, S583N,	--
ENSGALG00000011880	ENSGALT00000019385	BBS7	Function unknown	bardet-biedl syndrome 7	G64V, D89G,	--
ENSGALG00000011893	ENSGALT00000019409	SLC38A6	Amino acid transport and metabolism	Amino acid transporter	I157V, C386G,	--
ENSGALG00000011900	ENSGALT00000019422	NAGA	Carbohydrate transport and metabolism	alpha-galactosidase	G93E, L409Q, G417R,	G93E,
ENSGALG00000011918	ENSGALT00000019444	CCDC134	General function prediction only	coiled-coil domain containing 134	T195S,	--
ENSGALG00000011934	ENSGALT00000019464	DESI1	Posttranslational modification, protein turnover, chaperones	Desumoylating isopeptidase 1	G54E, L65I,	--
ENSGALG00000011950	ENSGALT00000019494	ACO2	Energy production and conversion	aconitate hydratase	G310S, V441I,	--
ENSGALG00000011953	ENSGALT00000019497	PHF5A	Function unknown	PHD finger protein 5A	A18G,	--
ENSGALG00000011961	ENSGALT00000019506	TNIP3	General function prediction only	TNFAIP3 interacting protein 3	R78G, N115I,	--
ENSGALG00000011963	ENSGALT00000019510	PRDM5	General function prediction only	zinc finger protein	V213I,	--
ENSGALG00000011966	ENSGALT00000019518	RANGAP1	Intracellular trafficking, secretion, and vesicular transport	RAN GTPase activating protein 1	S404L,	--
ENSGALG00000011976	ENSGALT00000019537	L3MBTL2	Transcription	L(3)mbt-like 2 (Drosophila)	T96I,	--
ENSGALG00000011990	ENSGALT00000019558	USP53	Posttranslational modification, protein turnover, chaperones	ubiquitin specific peptidase 53	W368C, S475Y, L500F, C503Y, E545D,	W368C,
ENSGALG00000011994	ENSGALT00000019566	SYNPO2	Posttranslational modification, protein turnover, chaperones	synaptopodin 2	G226E, E228A, I277T, H343Q, G581N, A599S, A780G, T942N, A950T, E1061Q,	--
ENSGALG00000011998	ENSGALT00000019581	SEC24D	Intracellular trafficking, secretion, and vesicular transport	SEC24 family, member	P105S, P109L, T127A, P207S, I459V, E470Q, M571V, K666R, L993V, V1023M,	--
ENSGALG00000012004	ENSGALT00000019591	PRSS12	Posttranslational modification, protein turnover, chaperones	protease	R600K, N725T, K730Q,	--
ENSGALG00000012013	ENSGALT00000019602	SLC25A17	Energy production and conversion	solute carrier family 25 (mitochondrial carrier)	L258P,	--
ENSGALG00000012015	ENSGALT00000019606	NDST4	Function unknown	N-deacetylase N-sulfotransferase (Heparan glucosaminyl)	Y157F, T298M,	--
ENSGALG00000012018	ENSGALT00000019611	UGT8	Energy production and conversion ,Carbohydrate transport and metabolism ,	glycosyltransferase	S88C, K139Q, K442R, Y498C,	--
ENSGALG00000012023	ENSGALT00000019620	DACT1	Cytoskeleton	dapper, antagonist of beta-catenin, homolog 1 (Xenopus laevis)	N386S, F525L,	--
ENSGALG00000012030	ENSGALT00000019632	QSER1	Posttranslational modification, protein turnover, chaperones	Glutamine and serine rich 1	T94A, S794A, N887T, T944A, N1039S,	--
ENSGALG00000012033	ENSGALT00000019637	SGSM3	Signal transduction mechanisms	Small G protein signaling modulator 3	D59G,	--
ENSGALG00000012039	ENSGALT00000019655	PSMA3	Posttranslational modification, protein turnover, chaperones	The proteasome is a multicatalytic proteinase complex which is characterized by its ability to cleave peptides with Arg, Phe, Tyr, Leu, and Glu adjacent to the leaving group at neutral or slightly basic pH. The proteasome has an ATP-dependent proteolytic activity (By similarity)	M182V,	--
ENSGALG00000012055	ENSGALT00000019692		Signal transduction mechanisms	Serine Threonine protein kinase	M209T, A356T,	--
ENSGALG00000012061	ENSGALT00000019704		Energy production and conversion	glycerol-3-phosphate dehydrogenase	E171D, K327R,	--
ENSGALG00000012068	ENSGALT00000019715		Replication, recombination and repair	Helicase	I209M, K240N, L333V, T544A, I689V, S862R,	--
ENSGALG00000012082	ENSGALT00000019737	FAIM	Signal transduction mechanisms	Fas apoptotic inhibitory molecule	T130K, E137G,	--
ENSGALG00000012101	ENSGALT00000019765	AP5M1	Intracellular trafficking, secretion, and vesicular transport	adaptor-related protein complex 5, mu 1 subunit	V270I, I353M,	--
ENSGALG00000012106	ENSGALT00000019774	SCTR	Signal transduction mechanisms	Receptor	S67T, G378V,	--
ENSGALG00000012129	ENSGALT00000019817	CCDC93	Function unknown	Coiled-coil domain containing 93	Q378R,	--
ENSGALG00000012131	ENSGALT00000019819	ELOVL6	Lipid transport and metabolism	fatty acid elongase	V229M,	--
ENSGALG00000012140	ENSGALT00000019832	FSHB	Extracellular structures	follicle stimulating hormone, beta polypeptide	N127V,	--
ENSGALG00000012144	ENSGALT00000019837	MIEF1	Function unknown	Smith-Magenis syndrome chromosome region, candidate 7-like	N75S,	--
ENSGALG00000012145	ENSGALT00000019839	TBPL2	Transcription	General factor that plays a role in the activation of archaeal genes transcribed by RNA polymerase. Binds specifically to the TATA box promoter element which lies close to the position of transcription initiation (By similarity)	D103G, S114L,	--
ENSGALG00000012147	ENSGALT00000019841	DDX18	Replication, recombination and repair	atp-dependent rna helicase	N383H,	--
ENSGALG00000012159	ENSGALT00000019859	ACTR3	Cytoskeleton	actin-related protein	T113A,	--
ENSGALG00000012160	ENSGALT00000019860	KIF18A	Cytoskeleton	Kinesin family member	C478S, V579L, T786A,	--
ENSGALG00000012181	ENSGALT00000019889	RRH	Function unknown	retinal pigment epithelium-derived rhodopsin homolog	D5N, K181N,	--
ENSGALG00000012186	ENSGALT00000019897	CASP6	Posttranslational modification, protein turnover, chaperones	Caspase 6, apoptosis-related cysteine peptidase	P301L,	--
ENSGALG00000012187	ENSGALT00000019898		Function unknown	mannosyl (alpha-1,6-)-glycoprotein beta-1,6-N-acetyl-glucosaminyltransferase	P416A,	--
ENSGALG00000012199	ENSGALT00000019920	WDHD1	General function prediction only	WD repeat and HMG-box DNA binding protein 1	K130Q, I184V, I303V, N310S, I462V, I653T, N677S, S815N, A818V,	--
ENSGALG00000012207	ENSGALT00000019931	CCNT2	Cell cycle control, cell division, chromosome partitioning ,Transcription ,Replication, recombination and repair ,	Component of the SRB8-11 complex. The SRB8-11 complex is a regulatory module of the Mediator complex which is itself involved in regulation of basal and activated RNA polymerase II- dependent transcription. The SRB8-11 complex may be involved in the transcriptional repression of a subset of genes regulated by Mediator. It may inhibit the association of the Mediator complex with RNA polymerase II …	D308E,	--
ENSGALG00000012214	ENSGALT00000019948	RAB3GAP1	General function prediction only	RAB3 GTPase activating protein subunit 1	S458N,	--
ENSGALG00000012222	ENSGALT00000019958	RAP1GDS1	Signal transduction mechanisms	RAP1, GTP-GDP dissociation stimulator 1	I563V, S597L,	--
ENSGALG00000012227	ENSGALT00000019968	TSPAN5	Intracellular trafficking, secretion, and vesicular transport	Tetraspanin 5	F89L,	--
ENSGALG00000012237	ENSGALT00000019982	POLE2	Replication, recombination and repair	DNA polymerase epsilon subunit	A69G, I82M, S358R,	--
ENSGALG00000012259	ENSGALT00000020021	UBXN4	Function unknown	UBX domain protein 4	E121D, V156A,	--
ENSGALG00000012273	ENSGALT00000020050	SOS2	Signal transduction mechanisms	Son of sevenless homolog	I87M, T714A,	--
ENSGALG00000012289	ENSGALT00000020082	SHPRH	Replication, recombination and repair	SNF2 histone linker PHD RING helicase, E3 ubiquitin protein ligase	V58G, V99A, K250R, L294R, T555A, S556P, I1174V,	--
ENSGALG00000012295	ENSGALT00000020088	CDKL1	Signal transduction mechanisms	Cyclin-dependent kinase-like	I188V,	--
ENSGALG00000012296	ENSGALT00000020091	EIF3L	Translation, ribosomal structure and biogenesis	Component of the eukaryotic translation initiation factor 3 (eIF-3) complex, which is involved in protein synthesis and, together with other initiation factors, stimulates binding of mRNA and methionyl-tRNAi to the 40S ribosome (By similarity)	N169S,	--
ENSGALG00000012308	ENSGALT00000020115	MANBA	Carbohydrate transport and metabolism	hydrolase family 2	S248A, A293T, M313I, T582A, K617R, H718Y, K740E,	--
ENSGALG00000012260	ENSGALT00000020154	LCT	Carbohydrate transport and metabolism	beta-glucosidase	R42G, T266R, E354D, K887E, I1037V, F1086I, N1187S, N1319D, A1895G,	--
ENSGALG00000012364	ENSGALT00000020195	PPIL4	Posttranslational modification, protein turnover, chaperones	PPIases accelerate the folding of proteins	E369D,	--
ENSGALG00000012365	ENSGALT00000020196	PYGL	Carbohydrate transport and metabolism	Phosphorylase is an important allosteric enzyme in carbohydrate metabolism. Enzymes from different sources differ in their regulatory mechanisms and in their natural substrates. However, all known phosphorylases share catalytic and structural properties (By similarity)	R410K, V600I,	--
ENSGALG00000012378	ENSGALT00000020211	KATNA1	Posttranslational modification, protein turnover, chaperones	Katanin p60 subunit A-like	D94S, K182R,	--
ENSGALG00000012387	ENSGALT00000020225	NUP43	General function prediction only	Nucleoporin 43kDa	N106S, Y120C, I185V, I196V,	--
ENSGALG00000012412	ENSGALT00000020285	MTHFD1L	Nucleotide transport and metabolism	formyltetrahydrofolate synthetase	A46V, P115T, P314S, S317R, G487R, K595T, N806H,	--
ENSGALG00000012457	ENSGALT00000020361	SSTR3	Intracellular trafficking, secretion, and vesicular transport	somatostatin receptor 3	S31N,	--
ENSGALG00000012462	ENSGALT00000020366	KIF5C	Cytoskeleton	Kinesin family member	D148E, N197D,	--
ENSGALG00000012483	ENSGALT00000020394	TMPRSS6	Posttranslational modification, protein turnover, chaperones	protease	Q153E, T409S,	--
ENSGALG00000012541	ENSGALT00000020484	MB	Intracellular trafficking, secretion, and vesicular transport	Serves as a reserve supply of oxygen and facilitates the movement of oxygen within muscles	G58A,	--
ENSGALG00000012542	ENSGALT00000020485	RASD2	General function prediction only	RASD family, member 2	S145G,	--
ENSGALG00000012543	ENSGALT00000020486	GPD2	Energy production and conversion	glycerol-3-phosphate dehydrogenase 2 (mitochondrial)	E590V,	--
ENSGALG00000012546	ENSGALT00000020490	MCM5	Replication, recombination and repair	dna replication licensing factor	E118D, S306T, I419V,	--
ENSGALG00000012552	ENSGALT00000020498	TOM1	Intracellular trafficking, secretion, and vesicular transport	Target of	S171N,	--
ENSGALG00000012561	ENSGALT00000020513	PKP4	Intracellular trafficking, secretion, and vesicular transport	catenin (cadherin-associated protein), delta	E20G, P29A, T31A, N662S, I682M, N730S, S1060P,	--
ENSGALG00000012569	ENSGALT00000020524	FBXO7	Posttranslational modification, protein turnover, chaperones	F-box protein 7	K129N, M375I,	--
ENSGALG00000012570	ENSGALT00000020527	TANC1	General function prediction only	Ankyrin Repeat	N330S, G347A, P619A, A685T, E1292D, K1416R, T1548A, T1585S, V1730A,	--
ENSGALG00000012585	ENSGALT00000020549		Posttranslational modification, protein turnover, chaperones	Ribosomal protein	S125T, E335D, Q425H,	--
ENSGALG00000012610	ENSGALT00000020588	CTSL2	Posttranslational modification, protein turnover, chaperones	cysteine	E218D,	--
ENSGALG00000012613	ENSGALT00000020592	FBP1	Carbohydrate transport and metabolism	Fructose-1,6-bisphosphatase	A180S,	--
ENSGALG00000012618	ENSGALT00000020599	FANCC	Function unknown	Fanconi anemia, complementation group C	T205S, D281G, D384Y, M457K, Q542R,	D281G, D384Y,
ENSGALG00000012619	ENSGALT00000020600	PRDM4	Transcription	May function as a transcription factor involved in cell differentiation (By similarity)	S823G,	--
ENSGALG00000012638	ENSGALT00000020627	CRY1	Replication, recombination and repair	deoxyribo-dipyrimidine photolyase	V543A,	--
ENSGALG00000012639	ENSGALT00000020628	MTERF2	Transcription	MTERF domain containing 3	Y89H, Q292E, T332A, K348R,	--
ENSGALG00000012662	ENSGALT00000020668	NUAK1	Signal transduction mechanisms	NUAK family SNF1-like kinase	G469S,	--
ENSGALG00000012681	ENSGALT00000020690	MBOAT1	Lipid transport and metabolism	membrane bound O-acyltransferase domain containing	I343L,	--
ENSGALG00000012683	ENSGALT00000020693	RNF144B	General function prediction only	ring finger protein 217	A14S,	--
ENSGALG00000012689	ENSGALT00000020704	KIF13A	Cytoskeleton	Kinesin family member	A1266V, P1388S,	--
ENSGALG00000012691	ENSGALT00000020714	ALDH1L2	Energy production and conversion	Dehydrogenase	V276M, G586S,	--
ENSGALG00000012704	ENSGALT00000020742	MYLIP	Posttranslational modification, protein turnover, chaperones	myosin regulatory light chain interacting protein	N53S,	--
ENSGALG00000012724	ENSGALT00000020771	PAK1IP1	General function prediction only	PAK1 interacting protein 1	H31N, D168N,	--
ENSGALG00000012748	ENSGALT00000020803	ELOVL2	Lipid transport and metabolism	Elongation of very long chain fatty acids	S139N,	--
ENSGALG00000012754	ENSGALT00000020815	PAH	Amino acid transport and metabolism	Phenylalanine 4-monooxygenase	V112G,	--
ENSGALG00000012755	ENSGALT00000020816	IGF1	Signal transduction mechanisms	insulin-like growth factor 1 (somatomedin C)	T146A,	--
ENSGALG00000012756	ENSGALT00000020817	PARPBP	Replication, recombination and repair	PARP1 binding protein	A209L, P242S, N255Y, L379S, K460R, L548R,	--
ENSGALG00000012757	ENSGALT00000020819	PMCH	Signal transduction mechanisms	pro-melanin-concentrating hormone	G47E, A115S,	--
ENSGALG00000012760	ENSGALT00000020822		Function unknown	coiled-coil domain containing 53	N92S, T104M,	--
ENSGALG00000012768	ENSGALT00000020834	GCM2	Transcription	Glial cells missing homolog 2 (Drosophila)	A72T, P220S, Y298H, F466L,	--
ENSGALG00000012770	ENSGALT00000020836		Signal transduction mechanisms	Male germ cell-associated kinase	N94T,	--
ENSGALG00000012782	ENSGALT00000020852	BLOC1S5	Intracellular trafficking, secretion, and vesicular transport	Component of the BLOC-1 complex, a complex that is required for normal biogenesis of lysosome-related organelles (LRO), such as platelet dense granules and melanosomes. In concert with the AP-3 complex, the BLOC-1 complex is required to target membrane protein cargos into vesicles assembled at cell bodies for delivery into neurites and nerve terminals. The BLOC-1 complex, in association with SNAR…	Q162E,	--
ENSGALG00000012784	ENSGALT00000020859	TXNDC5	Posttranslational modification, protein turnover, chaperones	Thioredoxin	N180S, R320T,	--
ENSGALG00000012792	ENSGALT00000020873	HIPK2	Signal transduction mechanisms	Homeodomain interacting protein kinase	A807T,	--
ENSGALG00000012795	ENSGALT00000020877	RIOK1	Signal transduction mechanisms	serine threonine-protein kinase rio1	D512V,	--
ENSGALG00000012798	ENSGALT00000020881	SSR1	Intracellular trafficking, secretion, and vesicular transport	signal sequence receptor, alpha	G29S,	--
ENSGALG00000012802	ENSGALT00000020886	F13A1	General function prediction only	transglutaminase 1 (K polypeptide epidermal type I, protein-glutamine-gamma-glutamyltransferase)	S6R, L42V, H144Y, A185S, V217I, I219V, F332V, I343V, T558A, N621S, T667A,	--
ENSGALG00000012809	ENSGALT00000020897	ECI2	Lipid transport and metabolism	Enoyl-CoA hydratase	S45G,	--
ENSGALG00000012816	ENSGALT00000020909	SLC22A23	Intracellular trafficking, secretion, and vesicular transport	solute carrier family 22 member 23	G437S,	--
ENSGALG00000012837	ENSGALT00000020938	EXOC2	Intracellular trafficking, secretion, and vesicular transport	Exocyst complex component	T36S, E199V, L409P,	--
ENSGALG00000012847	ENSGALT00000020949		Amino acid transport and metabolism	amino acid	V170I,	--
ENSGALG00000012852	ENSGALT00000020962	MKRN1	Posttranslational modification, protein turnover, chaperones	makorin, ring finger protein	S79P,	--
ENSGALG00000012856	ENSGALT00000020968	WRNIP1	Replication, recombination and repair	Recombination factor protein RarA	L326V, G365D, T374M,	--
ENSGALG00000019553	ENSGALT00000020990	SERPINB10	Posttranslational modification, protein turnover, chaperones	Serpin peptidase inhibitor, clade	K26R, H95Y, S96A,	--
ENSGALG00000012873	ENSGALT00000021000	SERPINB5	Posttranslational modification, protein turnover, chaperones	Serpin peptidase inhibitor, clade	I321V,	--
ENSGALG00000012875	ENSGALT00000021002	WEE2	Cell cycle control, cell division, chromosome partitioning	Wee1 homolog	L296I, L315M, V487L, S530C,	--
ENSGALG00000012877	ENSGALT00000021004	CREB3L2	Transcription	cAMP responsive element binding protein 3-like	P432S,	--
ENSGALG00000012879	ENSGALT00000021007	VPS4B	Posttranslational modification, protein turnover, chaperones	vacuolar protein sorting 4 homolog	S13N, D49E,	--
ENSGALG00000012894	ENSGALT00000021029	CHRM2	Intracellular trafficking, secretion, and vesicular transport	Cholinergic receptor, muscarinic 2	D256G,	--
ENSGALG00000012898	ENSGALT00000021033	KIAA1468	Function unknown	LisH domain and HEAT repeat-containing protein	A616T,	--
ENSGALG00000012909	ENSGALT00000021053	C5orf22	Function unknown	chromosome 5 open reading frame 22	T193K, V258A,	--
ENSGALG00000012915	ENSGALT00000021064		Replication, recombination and repair	dna replication licensing factor	I357V,	--
ENSGALG00000012923	ENSGALT00000021079	CDH9	Function unknown	Cadherins are calcium dependent cell adhesion proteins (By similarity)	A396V, L505V,	--
ENSGALG00000012929	ENSGALT00000021086	DNM1L	Intracellular trafficking, secretion, and vesicular transport	Dynamin 1-like	A259T,	--
ENSGALG00000012932	ENSGALT00000021093	FGD4	Signal transduction mechanisms	FYVE, RhoGEF and PH domain containing	N561S, K599R,	--
ENSGALG00000019543	ENSGALT00000021151	OTULIN	Function unknown	Family with sequence similarity 105, member B	M62V, E163D, K174Q,	--
ENSGALG00000012966	ENSGALT00000021152	ZBTB2	General function prediction only	zinc finger and BTB domain containing 2	S178A,	--
ENSGALG00000012971	ENSGALT00000021165	CCDC170	Function unknown	coiled-coil domain containing 170	C201Y, S338L, R395K, L411M, Q430E, T481S, M541V, K621R, A641E, H684R,	--
ENSGALG00000012973	ENSGALT00000021168	ESR1	Transcription	Nuclear hormone receptor. The steroid hormones and their receptors are involved in the regulation of eukaryotic gene expression and affect cellular proliferation and differentiation in target tissues. Ligand-dependent nuclear transactivation involves either direct homodimer binding to a palindromic estrogen response element (ERE) sequence or association with other DNA- binding transcription facto…	S40G,	--
ENSGALG00000012985	ENSGALT00000021197	SLC6A13	Inorganic ion transport and metabolism	Transporter	A508V,	--
ENSGALG00000012987	ENSGALT00000021201	CCDC77	Function unknown	Coiled-coil domain containing 77	I89V, E91K, H334R, Q396E,	--
ENSGALG00000012997	ENSGALT00000021223		Cytoskeleton	Dynein, axonemal, heavy chain	E806K, L829M, P944L, E954Q, K1221N, D1298N, A2178T, E2231K, V2255I, R2336K, G2482E, I2611T, I2830M, H3070Y, I3243V, V3285A, I3470T, G3508V, N3645S, L3897F, E4032D, N4275K, L4309V, T4333A, V4382I, K4391M, R4404Q, A4452V, T4469A, M4560T,	--
ENSGALG00000013036	ENSGALT00000021281	ATP6V1E1	Energy production and conversion	Produces ATP from ADP in the presence of a proton gradient across the membrane (By similarity)	N96T,	--
ENSGALG00000013064	ENSGALT00000021325	NSUN2	Translation, ribosomal structure and biogenesis	nOP2 Sun	I258V, I325V,	--
ENSGALG00000013069	ENSGALT00000021340	BPGM	Carbohydrate transport and metabolism	Catalyzes the interconversion of 2-phosphoglycerate and 3-phosphoglycerate (By similarity)	G75D,	--
ENSGALG00000013094	ENSGALT00000021376	DDC	Amino acid transport and metabolism	decarboxylase	A88S, G303S,	--
ENSGALG00000013135	ENSGALT00000021443	GALNT1	General function prediction only	polypeptide N-acetylgalactosaminyltransferase	K164R, I434V,	--
ENSGALG00000013138	ENSGALT00000021448	TMEM245	Function unknown	transmembrane protein 245	K446Q,	--
ENSGALG00000013149	ENSGALT00000021464	MOCOS	General function prediction only	MOSC domain-containing protein	I479V, R539H, N558S,	--
ENSGALG00000013154	ENSGALT00000021476	SLCO1C1	Inorganic ion transport and metabolism	solute carrier organic anion transporter family, member 1c1	I44V,	--
ENSGALG00000013157	ENSGALT00000021488	BAG1	Posttranslational modification, protein turnover, chaperones	Bcl-2-associated athanogene	I107T, N109H,	--
ENSGALG00000013167	ENSGALT00000021508	SDHA	Energy production and conversion	Succinate DeHydrogenase	A25V,	--
ENSGALG00000013173	ENSGALT00000021514	PYROXD1	General function prediction only	pyridine nucleotide-disulphide oxidoreductase domain 1	H94R, T248A, V294G, I399V,	--
ENSGALG00000013177	ENSGALT00000021521	BCAT1	Amino acid transport and metabolism	brancheD-chain amino acid aminotransferase	V309A, N370K,	--
ENSGALG00000019527	ENSGALT00000021531	SLC6A19	Inorganic ion transport and metabolism	Transporter	L6I, V474I, I511V, I588V,	--
ENSGALG00000013189	ENSGALT00000021549	LPCAT1	Lipid transport and metabolism	Lysophosphatidylcholine acyltransferase	D236V,	--
ENSGALG00000013207	ENSGALT00000021576	CTNNAL1	Extracellular structures	catenin (cadherin-associated protein), alpha-like 1	G300S, I624V, T690A,	--
ENSGALG00000013211	ENSGALT00000021583	Sial-T2	Carbohydrate transport and metabolism	ST8 alpha-N-acetyl-neuraminide alpha-2,8-sialyltransferase 1	L68M,	--
ENSGALG00000013212	ENSGALT00000021584		General function prediction only	Transmembrane protein with EGF-like and two follistatin-like domains	D143G,	--
ENSGALG00000013225	ENSGALT00000021603	VAT1L	Energy production and conversion	vesicle amine transport protein 1 homolog (T	M334V,	--
ENSGALG00000013226	ENSGALT00000021604		Function unknown	Sulfotransferase	R21M, K212Q, L274F,	--
ENSGALG00000013265	ENSGALT00000021664	GYS2	Carbohydrate transport and metabolism	glycogen synthase	Q679R,	--
ENSGALG00000013272	ENSGALT00000021680	PRMT8	General function prediction only	Protein arginine n-methyltransferase	T285I, I304V,	--
ENSGALG00000013273	ENSGALT00000021682	SPX	Function unknown	chromosome 12 open reading frame 39	A30V,	--
ENSGALG00000013297	ENSGALT00000021712	BBOX1	Lipid transport and metabolism	butyrobetaine (gamma), 2-oxoglutarate dioxygenase (gamma-butyrobetaine hydroxylase) 1	Q288E, D323E,	--
ENSGALG00000013304	ENSGALT00000021727	SLC5A12	Amino acid transport and metabolism	symporter	L104I, S383N,	--
ENSGALG00000013311	ENSGALT00000021741	ANO3	Intracellular trafficking, secretion, and vesicular transport	Anoctamin	A160G,	--
ENSGALG00000013365	ENSGALT00000021807		Transcription	scaffold attachment factor	S362C, T501A,	--
ENSGALG00000013372	ENSGALT00000021816	IL7R	Intracellular trafficking, secretion, and vesicular transport	interleukin 7 receptor	F65Y, Y87R, S125N, E200K, S228A, K229R,	--
ENSGALG00000013377	ENSGALT00000021822	LMBRD2	Function unknown	LMBR1 domain-containing protein	E244V, P626R,	--
ENSGALG00000013397	ENSGALT00000021849	EXOC3	Intracellular trafficking, secretion, and vesicular transport	Exocyst complex component	K382T, T519A, I533N, P719S,	--
ENSGALG00000013420	ENSGALT00000021889	FOXM1	Transcription	forkhead box M1	S135P, S421P, L456F, E480K, F526L, I554M, L781I,	--
ENSGALG00000013437	ENSGALT00000021912	GAN	Signal transduction mechanisms	Gigaxonin	N249S,	--
ENSGALG00000013438	ENSGALT00000021913	TEX10	Function unknown	Testis expressed 10	V103A, L401V,	--
ENSGALG00000013468	ENSGALT00000021952	TLR3	Function unknown	toll-like receptor	N151D, N426D, P460Q, I581V, A589T, K718R, H749R,	--
ENSGALG00000013481	ENSGALT00000021966	IKZF3	General function prediction only	zinc finger protein 64 homolog (mouse)	S110G,	--
ENSGALG00000013535	ENSGALT00000022040	CYP4V2	Secondary metabolites biosynthesis, transport and catabolism	Cytochrome p450	N258S, D286N,	--
ENSGALG00000013568	ENSGALT00000022087	NR4A3	Transcription	Nuclear receptor subfamily 4, group A, member	P135T,	--
ENSGALG00000013583	ENSGALT00000022105	FAM114A1	Function unknown	family with sequence similarity 114, member	S44A, T107M, S118T, G215V,	--
ENSGALG00000013602	ENSGALT00000022129	PCM1	General function prediction only	Pericentriolar material 1	S125A, R292Q, D491N, D608E, E721D, I883V, E889D, T970A,	--
ENSGALG00000013606	ENSGALT00000022137	FGL1	General function prediction only	Fibrinogen-like 1	K59R, I61R,	--
ENSGALG00000013607	ENSGALT00000022138		Posttranslational modification, protein turnover, chaperones	F-box protein 5	K156R, F217S,	--
ENSGALG00000013609	ENSGALT00000022140	MTRF1L	Translation, ribosomal structure and biogenesis	Peptide chain release factor 1 directs the termination of translation in response to the peptide chain termination codons UAG and UAA (By similarity)	A237S, E250G,	--
ENSGALG00000013632	ENSGALT00000022178	ACOT13	Secondary metabolites biosynthesis, transport and catabolism	thioesterase Superfamily protein	I109V,	--
ENSGALG00000013641	ENSGALT00000022188		General function prediction only	Myotubularin related protein	L150M, H158R, L247H,	--
ENSGALG00000013647	ENSGALT00000022196	TFB1M	Translation, ribosomal structure and biogenesis	Specifically dimethylates two adjacent adenosines (A1518 and A1519) in the loop of a conserved hairpin near the 3'-end of 16S rRNA in the 30S particle. May play a critical role in biogenesis of 30S subunits (By similarity)	H124R,	--
ENSGALG00000013659	ENSGALT00000022217	NOX3	Inorganic ion transport and metabolism ,Secondary metabolites biosynthesis, transport and catabolism ,	NADPH- oxidase	T59A, P149S, A366T, N528S, V554A,	--
ENSGALG00000013672	ENSGALT00000022232	TSHZ1	General function prediction only	Teashirt zinc finger homeobox	E510D, T523A, V665L,	--
ENSGALG00000013703	ENSGALT00000022283	FAM69C	Function unknown	family with sequence similarity 69, member C	P46Q,	--
ENSGALG00000013738	ENSGALT00000022327	OPTN	Intracellular trafficking, secretion, and vesicular transport	Optineurin	D487G, G501A,	--
ENSGALG00000013740	ENSGALT00000022329	SLC20A1	Inorganic ion transport and metabolism	Solute carrier family 20 (Phosphate transporter), member	P353A, S370C, T449S, D548N, V553E, I569M,	S370C,
ENSGALG00000013742	ENSGALT00000022333	EZR	Cytoskeleton	Involved in connections of major cytoskeletal structures to the plasma membrane	Q416H, I447L, N487H, I517V, K545R,	--
ENSGALG00000013743	ENSGALT00000022334	ENPP7	General function prediction only	type i phosphodiesterase nucleotide pyrophosphatase	H231R,	H231R,
ENSGALG00000013745	ENSGALT00000022336	RTTN	Function unknown	determination of left/right symmetry	G83E, A347V, V387I, L519V, K606Q, A793T, I829V, S1012P, L1176M, I1215V, A1342T, L1818V, Q1933L, Y1986H, S1997G, N2077S, I2089V, N2209S,	--
ENSGALG00000013747	ENSGALT00000022338	TAGAP	Signal transduction mechanisms	T-cell activation RhoGTPase activating protein	I381V,	--
ENSGALG00000013764	ENSGALT00000022357	AASDH	Function unknown	Part of the outer membrane protein assembly complex, which is involved in assembly and insertion of beta-barrel proteins into the outer membrane (By similarity)	Q707R,	--
ENSGALG00000013765	ENSGALT00000022358		Function unknown	LTV1 homolog (S. cerevisiae)	N219D, H381N,	--
ENSGALG00000013773	ENSGALT00000022368	FUCA2	Carbohydrate transport and metabolism	fucosidase, alpha-L	E73Q, G86W,	--
ENSGALG00000013780	ENSGALT00000022379	AIG1	Function unknown	androgen-induced 1	V99E,	--
ENSGALG00000013782	ENSGALT00000022381	CDH7	Function unknown	Cadherins are calcium dependent cell adhesion proteins (By similarity)	I395V, D588Y,	--
ENSGALG00000013803	ENSGALT00000022408	GPR126	Signal transduction mechanisms	g protein-coupled receptor	V291L, F733I, D842V, L843F, V1019I,	--
ENSGALG00000013810	ENSGALT00000022415	VTA1	Intracellular trafficking, secretion, and vesicular transport	Vps20-associated 1 homolog (S. cerevisiae)	H213Q,	--
ENSGALG00000013813	ENSGALT00000022419	NMBR	Intracellular trafficking, secretion, and vesicular transport	Gastrin-releasing peptide receptor	A349T,	--
ENSGALG00000013822	ENSGALT00000022430	TXLNB	Cytoskeleton	Taxilin beta	A98T, T192I,	--
ENSGALG00000013830	ENSGALT00000022445	SLMO1	Function unknown	slowmo homolog 2 (Drosophila)	S165G,	--
ENSGALG00000013848	ENSGALT00000022468	MVK	Lipid transport and metabolism	mevalonate kinase	T230M,	--
ENSGALG00000013858	ENSGALT00000022479		Function unknown	centrosomal protein 76kDa	K118R, T208A, V526A,	--
ENSGALG00000013863	ENSGALT00000022485	PSMG2	Posttranslational modification, protein turnover, chaperones	proteasome (prosome, macropain) assembly chaperone 2	E148K,	--
ENSGALG00000013867	ENSGALT00000022489	PTPN2	Signal transduction mechanisms	protein tyrosine phosphatase	T129A,	--
ENSGALG00000013874	ENSGALT00000022499	PEX7	Intracellular trafficking, secretion, and vesicular transport	peroxisomal biogenesis factor 7	Y105C, V142A,	--
ENSGALG00000013900	ENSGALT00000022537	MAP7	Cytoskeleton	Microtubule-associated protein 7	G331A, P357S, E400D,	--
ENSGALG00000013907	ENSGALT00000022562	KDR	Signal transduction mechanisms	fms-related tyrosine kinase 1 (vascular endothelial growth factor vascular permeability factor receptor)	V281I, S288N, K344R, K738R,	--
ENSGALG00000013926	ENSGALT00000022573	DCLRE1C	Translation, ribosomal structure and biogenesis	cleavage and polyadenylation	T71S, T375A, I403V, K633R,	--
ENSGALG00000019967	ENSGALT00000022584	MTFR2	Function unknown	family with sequence similarity 54, member A	Q171R, S174G, Q213E, N240S, S277R,	--
ENSGALG00000013935	ENSGALT00000022585	BCLAF1	Transcription	BCL2-associated transcription factor 1	T353A,	--
ENSGALG00000013940	ENSGALT00000022592	LNX1	Posttranslational modification, protein turnover, chaperones	ligand of numb-protein X 1, E3 ubiquitin protein ligase	N386S,	--
ENSGALG00000013946	ENSGALT00000022602		General function prediction only	Sec1 family	I36V,	--
ENSGALG00000013950	ENSGALT00000022606	TBCE	Function unknown	Tubulin folding cofactor E	N288S, T449A,	--
ENSGALG00000013951	ENSGALT00000022607	AHI1	General function prediction only	Abelson helper integration site 1	V326I, I389V, L412V, E458A, D665E,	--
ENSGALG00000013952	ENSGALT00000022610	B3GALNT2	Carbohydrate transport and metabolism	Beta-1,3-N-acetylgalactosaminyltransferase 2	P133S,	--
ENSGALG00000013962	ENSGALT00000022632	HBS1L	Translation, ribosomal structure and biogenesis	This protein promotes the GTP-dependent binding of aminoacyl-tRNA to the A-site of ribosomes during protein biosynthesis (By similarity)	Q103E,	--
ENSGALG00000013969	ENSGALT00000022641	ALDH8A1	Energy production and conversion	Dehydrogenase	V137M,	--
ENSGALG00000013980	ENSGALT00000022653	SLC2A12	Carbohydrate transport and metabolism	Solute carrier family 2, facilitated glucose transporter member	Q166H, G441D, E591K,	--
ENSGALG00000013999	ENSGALT00000022680	FBXO40	Function unknown	F-box protein 40	G143S, E202Q, Q234K,	--
ENSGALG00000014026	ENSGALT00000022719	DNAJB14	Posttranslational modification, protein turnover, chaperones	DnaJ (Hsp40) homolog, subfamily	E122D,	--
ENSGALG00000014038	ENSGALT00000022732	CDC123	Function unknown	cell division cycle 123 homolog (S. cerevisiae)	Y283C, K328V,	--
ENSGALG00000014064	ENSGALT00000022768	WDR19	General function prediction only	WD repeat domain 19	S299G, R694Q, N775S, M919L, K971R, H1132D, K1280R,	--
ENSGALG00000014071	ENSGALT00000022784		Intracellular trafficking, secretion, and vesicular transport	inositol 1,4,5-trisphosphate receptor type	T958A, V1727M, I1846V,	--
ENSGALG00000014084	ENSGALT00000022805	FGFR1OP2	Function unknown	FGFR1 oncogene partner 2	E87G,	--
ENSGALG00000014085	ENSGALT00000022808	TM7SF3	Function unknown	transmembrane 7 superfamily member 3	A40S, I96M, I239V, G310S,	--
ENSGALG00000014096	ENSGALT00000022820	ARNTL2	Transcription	aryl hydrocarbon receptor nuclear	P78L,	--
ENSGALG00000014103	ENSGALT00000022828	FRYL	General function prediction only	furry homolog (Drosophila)	V783I, I922V, G1591S, I1879V, G2566C,	--
ENSGALG00000014124	ENSGALT00000022858	TEC	Signal transduction mechanisms	tyrosine kinase	K238R, Y454F,	--
ENSGALG00000014126	ENSGALT00000022860		Function unknown	Poly(U)-specific	N9S, K14R,	--
ENSGALG00000014136	ENSGALT00000022870	CNGA1	Intracellular trafficking, secretion, and vesicular transport	cyclic nucleotide gated channel alpha	I206V,	--
ENSGALG00000014138	ENSGALT00000022872	NFXL1	General function prediction only	Nuclear transcription factor, X-box binding-like 1	K343R, P413S, R458K, K636R, Q646H, V870M,	--
ENSGALG00000014144	ENSGALT00000022884	CORIN	Posttranslational modification, protein turnover, chaperones	protease	N175S, T386D, E717V, E751D,	--
ENSGALG00000014163	ENSGALT00000022906	TTLL1	Posttranslational modification, protein turnover, chaperones	Tubulin tyrosine ligase-like family, member	T404S,	--
ENSGALG00000014166	ENSGALT00000022911	TSPO	Signal transduction mechanisms	tspo and mbr like protein	S25G,	--
ENSGALG00000014167	ENSGALT00000022912	TTLL12	Function unknown	tubulin tyrosine ligase-like family, member 12	E147D,	--
ENSGALG00000014178	ENSGALT00000022933	SCUBE1	Signal transduction mechanisms	Signal peptide, CUB domain, EGF-like	G459S, H610N,	--
ENSGALG00000014203	ENSGALT00000022970	PARVG	Cytoskeleton	Parvin, gamma	E121D,	--
ENSGALG00000014222	ENSGALT00000022998	NUP50	Intracellular trafficking, secretion, and vesicular transport	nucleoporin 50kDa	G83A, V441A,	--
ENSGALG00000014228	ENSGALT00000023006	SMC1B	Cell cycle control, cell division, chromosome partitioning	Required for chromosome condensation and partitioning (By similarity)	M34K, E99K, S104L, K158E, I167L, A203T, K343R, R443K, K452E, K588R, S724A, Q756E, E810Q, H836R, Q880R, K895E, K905R,	--
ENSGALG00000014233	ENSGALT00000023014	FBLN1	Signal transduction mechanisms	Fibulin 1	D35E, I46K, T98S,	--
ENSGALG00000014236	ENSGALT00000023022	ATP8A1	Inorganic ion transport and metabolism	Phospholipid-transporting atpase	D609G,	--
ENSGALG00000014242	ENSGALT00000023033		Function unknown	BEN domain containing 4	S29C,	--
ENSGALG00000014248	ENSGALT00000023043	TMEM33	Function unknown	Transmembrane protein 33	V119I,	--
ENSGALG00000014262	ENSGALT00000023068	APBB2	Posttranslational modification, protein turnover, chaperones	amyloid beta (A4) precursor protein-binding, family B, member	E171G,	--
ENSGALG00000014263	ENSGALT00000023070	PHC1	General function prediction only	polyhomeotic homolog 1 (Drosophila)	N273S, A543T,	--
ENSGALG00000014268	ENSGALT00000023080	CHRNA9	Function unknown	cholinergic receptor, nicotinic, alpha 9 (neuronal)	N406S, S408N,	--
ENSGALG00000014298	ENSGALT00000023118	RFC1	General function prediction only	replication factor c	K286R, K348R, S499P, S539A, K740Q, F1008S, E1028D, Q1100P,	--
ENSGALG00000014331	ENSGALT00000023158	FKBP4	Posttranslational modification, protein turnover, chaperones	Peptidyl-prolyl cis-trans isomerase	H426R,	--
ENSGALG00000014335	ENSGALT00000023162	ITFG2	General function prediction only	Integrin alpha FG-GAP repeat containing 2	I239V, G358R,	--
ENSGALG00000014336	ENSGALT00000023163	RELL1	Intracellular trafficking, secretion, and vesicular transport	RELT-like 1	Y124C,	--
ENSGALG00000007101	ENSGALT00000023211	ZPR1	General function prediction only	Zinc finger protein	I135V, S364C,	--
ENSGALG00000014372	ENSGALT00000023222	SLC34A2	Inorganic ion transport and metabolism	Na Pi-cotransporter	E30D,	--
ENSGALG00000023920	ENSGALT00000023235	PHYKPL	Amino acid transport and metabolism	aminotransferase	S82A, E198K, I372V, V426A,	--
ENSGALG00000014406	ENSGALT00000023273	PACRGL	Function unknown	PARK2 co-regulated-like	Q162H,	--
ENSGALG00000014410	ENSGALT00000023284	CSTB	General function prediction only	cystatin A (stefin A)	H83N,	--
ENSGALG00000013565	ENSGALT00000023339	CHD4	Transcription	Chromodomain helicase DNA binding protein	Q30P,	--
ENSGALG00000014561	ENSGALT00000023485	PTPN6	Signal transduction mechanisms	protein tyrosine phosphatase	D326E,	--
ENSGALG00000014570	ENSGALT00000023496	LPCAT3	Lipid transport and metabolism	membrane bound O-acyltransferase domain containing	N290S,	--
ENSGALG00000014603	ENSGALT00000023545	C1S	Posttranslational modification, protein turnover, chaperones	mannan-binding lectin serine peptidase 1 (C4 C2 activating component of Ra-reactive factor)	P10S, A16D, F119Y, P290A, S352R, P355A, L479V, I589V,	--
ENSGALG00000014614	ENSGALT00000023563	TNKS2	General function prediction only	Ankyrin Repeat	T949S,	--
ENSGALG00000014638	ENSGALT00000023591	ASH1L	General function prediction only	Histone-lysine N-methyltransferase	V152A, S242A, E465D, S582P, N588T, T807A, V967A, E1763D, S1960T, D2421G,	--
ENSGALG00000014674	ENSGALT00000023646	CLSTN3	Extracellular structures	CAlSYntenin	L570V,	--
ENSGALG00000014680	ENSGALT00000023656		Energy production and conversion	Solute carrier family 25 member	L51M, V237I,	--
ENSGALG00000014683	ENSGALT00000023661	PEX5	Intracellular trafficking, secretion, and vesicular transport	Peroxisomal biogenesis factor	D141E, D243E,	--
ENSGALG00000014687	ENSGALT00000023671	EPHA1	Signal transduction mechanisms	Serine Threonine protein kinase	R259Q, S308P, F313Y, D575G, K640R, L732F,	L732F,
ENSGALG00000014692	ENSGALT00000023681	LMNB1	Cell cycle control, cell division, chromosome partitioning ,Nuclear structure ,	Lamin A C	I443V,	--
ENSGALG00000014695	ENSGALT00000023686	CLCN1	Inorganic ion transport and metabolism	chloride channel	A627S,	--
ENSGALG00000014711	ENSGALT00000023722	PLPP1	Lipid transport and metabolism	PHOsphatase	V90I,	--
ENSGALG00000014712	ENSGALT00000023723	SLC38A9	Amino acid transport and metabolism	Solute carrier family 38, member 9	D105G, I149V, Q262H, S269F, N387K,	--
ENSGALG00000014736	ENSGALT00000023764		Posttranslational modification, protein turnover, chaperones	endothelin-converting enzyme	R62S, D159N, L225F, N399S, L434S,	--
ENSGALG00000014746	ENSGALT00000023779		Intracellular trafficking, secretion, and vesicular transport	Transient receptor potential cation channel subfamily V member	Q159K, H216R, I396F, T569A,	--
ENSGALG00000014749	ENSGALT00000023783	EPHB6	Signal transduction mechanisms	Serine Threonine protein kinase	V445I, D949E,	--
ENSGALG00000010335	ENSGALT00000023866		Signal transduction mechanisms	Phosphoinositide-3-kinase, regulatory subunit	N337T,	--
ENSGALG00000014787	ENSGALT00000023871	SLC30A5	Inorganic ion transport and metabolism	solute carrier family 30 (zinc transporter), member	I272V,	--
ENSGALG00000014790	ENSGALT00000023876	CDK7	Signal transduction mechanisms	Cyclin-Dependent Kinase	T285S,	--
ENSGALG00000014791	ENSGALT00000023879	WDR3	General function prediction only	WD repeat domain 3	A244T, L378F, A394P, V562A, V686I,	--
ENSGALG00000014798	ENSGALT00000023888	SERINC5	Intracellular trafficking, secretion, and vesicular transport	Serine incorporator 5	K282R,	--
ENSGALG00000014799	ENSGALT00000023894	METTL4	General function prediction only	Methyltransferase like 4	A10S, E26D, P105C, K344R,	--
ENSGALG00000014801	ENSGALT00000023897	NDC80	Cell cycle control, cell division, chromosome partitioning	NDC80 kinetochore complex component, homolog (S. cerevisiae)	Q22P, M27T, T39A, V157I, F266L, I326L, M348V, H395R, K461M, T573R, E590D, N607D, D631E,	--
ENSGALG00000014807	ENSGALT00000023905	MTX3	Function unknown	Metaxin 3	L151V,	--
ENSGALG00000014811	ENSGALT00000023912	SMCHD1	Function unknown	Structural maintenance of chromosomes flexible hinge domain containing 1	V996A, E1275A, K1366R, L1370V, E1560D,	--
ENSGALG00000014828	ENSGALT00000023937	ECHDC1	Lipid transport and metabolism	Enoyl-CoA hydratase	N50S, R265K,	--
ENSGALG00000014831	ENSGALT00000023941	TRMT11	Replication, recombination and repair	RNA methylase	I74V, T380K,	--
ENSGALG00000014832	ENSGALT00000023943	PRKAA1	Signal transduction mechanisms	Serine Threonine protein kinase	C504G,	--
ENSGALG00000014868	ENSGALT00000023989	SERINC1	Function unknown	serine incorporator	F112A, I378V, T427A, S484R,	--
ENSGALG00000014878	ENSGALT00000024007	MAN1A1	General function prediction only	Mannosidase alpha class	K489R,	--
ENSGALG00000014899	ENSGALT00000024033	NUS1	Lipid transport and metabolism	Catalyzes the condensation of isopentenyl diphosphate (IPP) with allylic pyrophosphates generating different type of terpenoids (By similarity)	Q98R,	Q98R,
ENSGALG00000014901	ENSGALT00000024035	METTL16	Function unknown	methyltransferase like 16	S415N, D438N,	--
ENSGALG00000014904	ENSGALT00000024038	CLUL1	General function prediction only	clusterin-like 1 (retinal)	E170K, I401V,	--
ENSGALG00000014907	ENSGALT00000024042	DCBLD1	Intracellular trafficking, secretion, and vesicular transport	Discoidin, CUB and LCCL domain containing 1	V313I, D525G,	--
ENSGALG00000014918	ENSGALT00000024061	RFX6	Transcription	regulatory factor X	T566A, S587T, A701S, N721S,	--
ENSGALG00000014920	ENSGALT00000024064	USP14	Posttranslational modification, protein turnover, chaperones	ubiquitin carboxyl-terminal hydrolase	D55V,	--
ENSGALG00000014925	ENSGALT00000024075	GPRC6A	Signal transduction mechanisms	G protein-coupled receptor, family C, group 6, member A	G29S, G39A, K285Q, T322I, I358V, T580M, F600L, I702V,	--
ENSGALG00000014939	ENSGALT00000024097	GFM2	Translation, ribosomal structure and biogenesis	G elongation factor, mitochondrial	V58I, I343V, Q359R, I401V, L568Q,	--
ENSGALG00000014963	ENSGALT00000024130	DSE	Lipid transport and metabolism	Dermatan sulfate epimerase	A582S,	--
ENSGALG00000014964	ENSGALT00000024132	NT5DC1	General function prediction only	5'-nucleotidase domain containing 1	M161V, D279E, P366S, T433I,	--
ENSGALG00000014965	ENSGALT00000024133	COL10A1	Posttranslational modification, protein turnover, chaperones	collagen	P309S,	--
ENSGALG00000014979	ENSGALT00000024165	FRK	Signal transduction mechanisms	Serine Threonine protein kinase	I134V, A136P,	--
ENSGALG00000014984	ENSGALT00000024171	F2RL1	Intracellular trafficking, secretion, and vesicular transport	coagulation factor II (thrombin) receptor-like 1	I191V, I266V,	--
ENSGALG00000015000	ENSGALT00000024191	LYAR	Function unknown	Ly1 antibody reactive homolog (mouse)	E79D, K185R, Y242C,	--
ENSGALG00000015001	ENSGALT00000024193	LAMA4	Function unknown	Laminin, alpha 4	Q877H, I937V,	--
ENSGALG00000015002	ENSGALT00000024194	MRPS27	Translation, ribosomal structure and biogenesis	Mitochondrial ribosomal protein S27	D103G, Q252K, Q317E,	--
ENSGALG00000015004	ENSGALT00000024197	RIOK3	Signal transduction mechanisms	serine threonine-protein kinase rio1	Q395R, N477S,	--
ENSGALG00000015015	ENSGALT00000024216	CYTL1	General function prediction only	Cytokine-like 1	T52M, H61Q,	--
ENSGALG00000015016	ENSGALT00000024217	SLC22A15	General function prediction only	solute carrier family 22	I39T,	--
ENSGALG00000015017	ENSGALT00000024218		Cytoskeleton	Tubulin is the major constituent of microtubules. It binds two moles of GTP, one at an exchangeable site on the beta chain and one at a non-exchangeable site on the alpha chain (By similarity)	I186V, V240I,	--
ENSGALG00000015020	ENSGALT00000024224	TMEM171	Function unknown	Transmembrane protein 171	F24L, L71F, F255C, G258R, V268I,	--
ENSGALG00000015026	ENSGALT00000024233	TRAF3IP2	Function unknown	TRAF3 interacting protein 2	N338S, P340L, G419S,	--
ENSGALG00000015028	ENSGALT00000024236	RLN1	Function unknown	IlGF	S156T, R161T,	--
ENSGALG00000015030	ENSGALT00000024240	NPC1	Intracellular trafficking, secretion, and vesicular transport	Niemann-Pick disease type C1	K146R, K169R, H223R, G343A, P393S, N577S, S631G, I646V, E815D, T971A, K1038N,	--
ENSGALG00000015037	ENSGALT00000024255	EVC	Function unknown	Ellis van Creveld syndrome	M217V, H400N, A422T, R449H, Q759R, S808C, L870Q,	--
ENSGALG00000015040	ENSGALT00000024256	SLC16A10	Carbohydrate transport and metabolism	major facilitator Superfamily	V102A, R167L, A175T, K383R,	--
ENSGALG00000015044	ENSGALT00000024260	GTF3C6	Transcription	general transcription factor IIIC, polypeptide 6, alpha 35kDa	E181D, A200V,	--
ENSGALG00000015045	ENSGALT00000024261		Carbohydrate transport and metabolism	Major Facilitator Superfamily	H109R,	--
ENSGALG00000015057	ENSGALT00000024288	DDO	Amino acid transport and metabolism	Catalyzes the last two steps in the biosynthesis of 5- methylaminomethyl-2-thiouridine (mnm(5)s(2)U) at the wobble position (U34) in tRNA. Catalyzes the FAD-dependent demodification of cmnm(5)s(2)U34 to nm(5)s(2)U34, followed by the transfer of a methyl group from S-adenosyl-L-methionine to nm(5)s(2)U34, to form mnm(5)s(2)U34 (By similarity)	Q126R, S261T,	--
ENSGALG00000015064	ENSGALT00000024304	TTC39C	Function unknown	tetratricopeptide repeat domain 39C	T181A, Q182R,	--
ENSGALG00000015069	ENSGALT00000024311	B4GALT4	Intracellular trafficking, secretion, and vesicular transport	UDP-Gal betaGlcNAc beta 1,4- galactosyltransferase, polypeptide 4	P76L, H122R,	--
ENSGALG00000015086	ENSGALT00000024335	OSBPL1A	Signal transduction mechanisms	Oxysterol-binding protein	V269A, S292N, K373N, P394S, N807S,	--
ENSGALG00000015090	ENSGALT00000024341	PLIN2	Function unknown	Perilipin 2	Q9K, V210A, N296S, Q365R,	--
ENSGALG00000015117	ENSGALT00000024389	DRD3	Signal transduction mechanisms	Dopamine receptor D3	Q231H,	--
ENSGALG00000015122	ENSGALT00000024404	TAF4B	Transcription	RNA polymerase II, TATA box binding protein (TBP)-associated factor	T55A, L287P, D479E, I506V, K604R,	--
ENSGALG00000015123	ENSGALT00000024406	ZDHHC23	General function prediction only	Zinc finger, DHHC-type containing	V213L,	--
ENSGALG00000015132	ENSGALT00000024417	CDH2	Function unknown	Cadherins are calcium dependent cell adhesion proteins (By similarity)	S67N, D69N, Q152R, I743V,	--
ENSGALG00000015133	ENSGALT00000024418		Signal transduction mechanisms	G protein-coupled receptor 15	D17N, R147K,	--
ENSGALG00000015139	ENSGALT00000024428	ABHD17B	General function prediction only	Hydrolase	R45H,	--
ENSGALG00000015140	ENSGALT00000024430		Intracellular trafficking, secretion, and vesicular transport	Component of intercellular desmosome junctions. Involved in the interaction of plaque proteins and intermediate filaments mediating cell-cell adhesion (By similarity)	V249M, T396R, V448A, L606V, T756A,	V249M, V448A,
ENSGALG00000015142	ENSGALT00000024433	DSG2	Intracellular trafficking, secretion, and vesicular transport	Component of intercellular desmosome junctions. Involved in the interaction of plaque proteins and intermediate filaments mediating cell-cell adhesion (By similarity)	V550A, V602A, L621R,	--
ENSGALG00000015151	ENSGALT00000024447	B4GALT6	Carbohydrate transport and metabolism	UDP-Gal betaGlcNAc beta 1,4- galactosyltransferase, polypeptide	Q118R,	--
ENSGALG00000015166	ENSGALT00000024478	GCNT1	Carbohydrate transport and metabolism	Glucosaminyl (N-acetyl) transferase	T47A, K48E, I52T, N207K, S301R, M389V,	--
ENSGALG00000015209	ENSGALT00000024541	NFIL3	Transcription	nuclear factor, interleukin 3 regulated	T146S,	--
ENSGALG00000015218	ENSGALT00000024560	SLC19A2	Inorganic ion transport and metabolism	Solute carrier family 19	I395T,	--
ENSGALG00000015225	ENSGALT00000024570	BLZF1	General function prediction only	basic leucine zipper nuclear factor 1	I14V,	--
ENSGALG00000015230	ENSGALT00000024577	NME7	Nucleotide transport and metabolism	NME NM23 family member 7	E58D,	--
ENSGALG00000015231	ENSGALT00000024580	ZBTB24	General function prediction only	zinc finger and BTB domain containing 24	A26S, V47M, A102T, S106C, P229R, S240T, S332G, M350I, T594A, A617G,	--
ENSGALG00000015246	ENSGALT00000024599	TIPRL	Function unknown	TIP41, TOR signaling pathway regulator-like (S. cerevisiae)	T123S,	--
ENSGALG00000015247	ENSGALT00000024600	GPR161	Signal transduction mechanisms	G protein-coupled receptor 161	T508P,	--
ENSGALG00000015259	ENSGALT00000024628	RB1CC1	Transcription ,Signal transduction mechanisms ,	RB1-inducible coiled-coil 1	N24K, T234A, A616V, V808L, S987N, T1182A, M1305L, A1409T,	--
ENSGALG00000015267	ENSGALT00000024644	CMSS1	Function unknown	cms1 ribosomal small subunit homolog (yeast)	I186L, K193R, I272V, I279L,	--
ENSGALG00000015271	ENSGALT00000024648	FILIP1L	Function unknown	filamin A interacting protein 1-like	N701S, P1076S,	--
ENSGALG00000015273	ENSGALT00000024650	TBC1D23	General function prediction only	TBC1 domain family member	K94Q,	--
ENSGALG00000015285	ENSGALT00000024670	TOMM70	Intracellular trafficking, secretion, and vesicular transport	Translocase of outer mitochondrial membrane 70 homolog A	L372Q,	--
ENSGALG00000015308	ENSGALT00000024710	SEC63	Intracellular trafficking, secretion, and vesicular transport	translocation protein SEC63	Y131F,	--
ENSGALG00000015309	ENSGALT00000024711	SCML4	Transcription	sex comb on midleg-like 4 (Drosophila)	Q118K, S260N,	S260N,
ENSGALG00000015315	ENSGALT00000024720	TRIM14	General function prediction only	tripartite motif containing 14	M245V,	--
ENSGALG00000015316	ENSGALT00000024723	C3H6ORF203	Function unknown	chromosome 6 open reading frame 203	F38V,	--
ENSGALG00000015326	ENSGALT00000024737	CLTA	Intracellular trafficking, secretion, and vesicular transport	clathrin, light chain	E83V,	--
ENSGALG00000015331	ENSGALT00000024745	GNE	Carbohydrate transport and metabolism	ROK family	L403V,	--
ENSGALG00000015336	ENSGALT00000024751	CHRNA8	Intracellular trafficking, secretion, and vesicular transport	Cholinergic receptor, nicotinic, alpha	V27G,	--
ENSGALG00000015338	ENSGALT00000024753	QRSL1	Translation, ribosomal structure and biogenesis	Allows the formation of correctly charged Gln-tRNA(Gln) through the transamidation of misacylated Glu-tRNA(Gln) in the mitochondria. The reaction takes place in the presence of glutamine and ATP through an activated gamma-phospho-Glu-tRNA(Gln) (By similarity)	D351E, S378A,	--
ENSGALG00000015340	ENSGALT00000024757	TGS1	General function prediction only	trimethylguanosine synthase 1	T274M, E624K,	--
ENSGALG00000015342	ENSGALT00000024760	CEP97	Cytoskeleton	centrosomal protein 97kDa	S120C, E466G, H503Q, H565L,	--
ENSGALG00000015343	ENSGALT00000024761	RTN4IP1	General function prediction only	Alcohol dehydrogenase zinc-binding domain protein	S47N, L182V, S215A,	--
ENSGALG00000015344	ENSGALT00000024762	NXPE3	Function unknown	neurexophilin and PC-esterase domain family, member 3	L14F, E46A, E126Q, Q140H, L200M, E318D, N402S,	--
ENSGALG00000015346	ENSGALT00000024766	NFKBIZ	Transcription	nuclear factor of kappa light polypeptide gene enhancer in B-cells inhibitor	A44V, T178A, P302Q,	--
ENSGALG00000015347	ENSGALT00000024768	ZPLD1	Intracellular trafficking, secretion, and vesicular transport	zona pellucida-like domain containing 1	L203F,	--
ENSGALG00000015356	ENSGALT00000024781	IFT57	Signal transduction mechanisms	Intraflagellar transport 57 homolog (Chlamydomonas)	T70A, I187V,	--
ENSGALG00000015360	ENSGALT00000024790	KIAA1524	Function unknown	kiaa1524	N775K,	--
ENSGALG00000015375	ENSGALT00000024806	PLCXD2	Posttranslational modification, protein turnover, chaperones	Phosphatidylinositol-specific phospholipase C X domain containing	F145Y,	--
ENSGALG00000015376	ENSGALT00000024807	IDUA	Carbohydrate transport and metabolism	iduronidase, alpha-L	V366I, T501A, F506L,	--
ENSGALG00000015388	ENSGALT00000024824		General function prediction only	PR domain containing 1 with ZNF domain	R449K,	--
ENSGALG00000015389	ENSGALT00000024825	TMPRSS7	Posttranslational modification, protein turnover, chaperones	protease	V272A, I351V, N381S, K394R, H646Y, D785N,	--
ENSGALG00000015397	ENSGALT00000024838	FNTA	Posttranslational modification, protein turnover, chaperones	(alpha) subunit	I50V,	--
ENSGALG00000015399	ENSGALT00000024840	FUT10	Posttranslational modification, protein turnover, chaperones	(Alpha (1,3) fucosyltransferase	A17V, I106V, S191T, S307G,	--
ENSGALG00000015403	ENSGALT00000024844	EPHA3	Signal transduction mechanisms	Eph receptor	A281T, L588V,	--
ENSGALG00000015409	ENSGALT00000024855	PROS1	Signal transduction mechanisms	Protein S (Alpha)	N154K, N498D,	--
ENSGALG00000015415	ENSGALT00000024865	HACE1	Posttranslational modification, protein turnover, chaperones	e3 ubiquitin protein ligase	T436A, Q502H,	--
ENSGALG00000015433	ENSGALT00000024891	ABCA1	Secondary metabolites biosynthesis, transport and catabolism	ATP-binding cassette sub-family A ABC1 member	T293N, A465T, V482A, S864T,	--
ENSGALG00000015436	ENSGALT00000024899	SDCBP	Intracellular trafficking, secretion, and vesicular transport	syndecan binding protein (syntenin)	N259T,	--
ENSGALG00000015443	ENSGALT00000024907	FKTN	Function unknown	regulation of protein glycosylation	E406G,	--
ENSGALG00000015464	ENSGALT00000024931	PTGFRN	Intracellular trafficking, secretion, and vesicular transport	prostaglandin F2 receptor negative regulator	R298G, M340L, T600A,	--
ENSGALG00000015465	ENSGALT00000024935	ASCC3	Replication, recombination and repair	helicase	N673S, Q761R, I1191V, L1262V, V1443I, I2023M, N2147S,	--
ENSGALG00000015466	ENSGALT00000024939	SIM1	Transcription	Single-minded homolog	D431E, I595V, G689S,	--
ENSGALG00000031814	ENSGALT00000024961		Posttranslational modification, protein turnover, chaperones	ubiquitin carboxyl-terminal hydrolase	G14E, V125A, N258S, M308V,	--
ENSGALG00000015480	ENSGALT00000024967	POGLUT1	Function unknown	CAP10	I334V,	--
ENSGALG00000015485	ENSGALT00000024972	ACP6	Signal transduction mechanisms	Acid phosphatase	T375I, N450D,	--
ENSGALG00000015486	ENSGALT00000024973	COQ3	Coenzyme transport and metabolism	Non-specific O-methyltransferase that catalyzes the 2 O- methylation steps in the ubiquinone biosynthetic pathway (By similarity)	K159R, S240G,	--
ENSGALG00000015489	ENSGALT00000024978	FAXC	Function unknown	Failed axon connections	T262A,	--
ENSGALG00000015491	ENSGALT00000024984	GPR89B	Intracellular trafficking, secretion, and vesicular transport	G- protein-coupled receptor	T225S,	--
ENSGALG00000015494	ENSGALT00000024988	HTR1F	Signal transduction mechanisms	5-hydroxytryptamine (Serotonin) receptor	L25F,	--
ENSGALG00000015537	ENSGALT00000025045	MAN2B2	Carbohydrate transport and metabolism	mannosidase, alpha, class 2B, member 2	A212S, D511N,	--
ENSGALG00000015556	ENSGALT00000025080	AFAP1	Cytoskeleton	actin filament associated protein	A287G, V295A,	--
ENSGALG00000015568	ENSGALT00000025100	SH3TC1	General function prediction only	SH3 domain and tetratricopeptide repeats 1	T108M, P119A, P235R, F258V, A478V, F507Y, E518D, A780V, V865I, P873L,	--
ENSGALG00000015573	ENSGALT00000025106	FHL5	Signal transduction mechanisms ,Cytoskeleton ,	four and A half lim domains	Y164H, G173D,	--
ENSGALG00000015580	ENSGALT00000025123	UFL1	Posttranslational modification, protein turnover, chaperones	ligase 1	Q122H, E336D, D374E, T465P, S528A, D618G, I673F,	--
ENSGALG00000015595	ENSGALT00000025146	GPR78	Intracellular trafficking, secretion, and vesicular transport	G protein-coupled receptor 78	V18I,	--
ENSGALG00000015608	ENSGALT00000025167	ADRA2C	Intracellular trafficking, secretion, and vesicular transport	adrenoceptor alpha	M97I,	--
ENSGALG00000015624	ENSGALT00000025190	VCAN	Signal transduction mechanisms	EGF-like domain	L1246S, I1296T, P1304L, V1321L, R1368Q, M1546V, V1554A, A1715T, L1768V, F1807T, T1848A, V1849A, T1990S, E2078G, P2183L, I2334T, Q2354R, S2427P, P2545S, S2552T, G2622R, A2739V, F2798I, Q2878E, S3109A, V3155I, A3174S, G3196E,	--
ENSGALG00000015635	ENSGALT00000025209	HTT	General function prediction only	huntingtin	A645V, E748D, T842A, M888T, L1357V, D2070E,	--
ENSGALG00000015660	ENSGALT00000025246	SNX30	Intracellular trafficking, secretion, and vesicular transport	sorting nexin	S57N,	--
ENSGALG00000015662	ENSGALT00000025250	LIPI	General function prediction only	lipase, member	M11T, K31N, L184I,	--
ENSGALG00000019201	ENSGALT00000025252	HSPA13	Posttranslational modification, protein turnover, chaperones	heat shock protein 70	Q273R,	--
ENSGALG00000015668	ENSGALT00000025265	RNF4	Posttranslational modification, protein turnover, chaperones	ring finger protein, 4	E99D,	--
ENSGALG00000015685	ENSGALT00000025298	CFAP99	Function unknown		D173N, N204D, I456V,	--
ENSGALG00000015699	ENSGALT00000025319	NELFA	Transcription	Wolf-Hirschhorn syndrome candidate 2	T384A,	--
ENSGALG00000015702	ENSGALT00000025324	PTGR1	General function prediction only	alcohol dehydrogenase	I72V, V123L, K195R, D210H,	--
ENSGALG00000015705	ENSGALT00000025327	WHSC1	General function prediction only	Histone-lysine N-methyltransferase	T13A, T207A, I211V,	--
ENSGALG00000015706	ENSGALT00000025330	LETM1	Function unknown	Leucine zipper-ef-hand containing transmembrane protein	C69W, W89R, E585Q,	--
ENSGALG00000015709	ENSGALT00000025333	TACC3	Function unknown	transforming, acidic coiled-coil containing protein 3	N7A, F85L, N152D, D153G, E186G, T273I, V283E, T534A, P545S, T595I, M886I,	--
ENSGALG00000015712	ENSGALT00000025338	SLBP	General function prediction only	Stem-loop binding protein	Y251C,	--
ENSGALG00000015713	ENSGALT00000025340	FAM53A	Posttranslational modification, protein turnover, chaperones	Family with sequence similarity 53, member	V385A,	--
ENSGALG00000015776	ENSGALT00000025443	GABRR2	Intracellular trafficking, secretion, and vesicular transport	gamma-aminobutyric acid (GABA) A receptor, rho	V453M,	--
ENSGALG00000015778	ENSGALT00000025445	GABRR1	Intracellular trafficking, secretion, and vesicular transport	gamma-aminobutyric acid (GABA) A receptor, rho 1	E53D,	--
ENSGALG00000015800	ENSGALT00000025477	ORC3	Replication, recombination and repair	origin recognition complex subunit	E244Q, T424V,	--
ENSGALG00000015804	ENSGALT00000025483	LTN1	Posttranslational modification, protein turnover, chaperones	listerin E3 ubiquitin protein ligase 1	S308G, A400N, I409T, I432M, T554G, L580R, H649R, H859N, H945Y, V946I, Y1049C, D1166E,	--
ENSGALG00000015805	ENSGALT00000025484		Cell motility	Charged multivesicular body protein	A137V,	--
ENSGALG00000015806	ENSGALT00000025485	RARS2	Translation, ribosomal structure and biogenesis	arginyL-tRNA synthetase	I211M,	--
ENSGALG00000015809	ENSGALT00000025489	RNF103	Posttranslational modification, protein turnover, chaperones	Ring finger protein 103	S193N, T561A,	--
ENSGALG00000015810	ENSGALT00000025491		Function unknown	chromosome 6 open reading frame 165	T55S, R69G, S281A, I284T, P321A, Y491C, S587T,	--
ENSGALG00000015813	ENSGALT00000025494	USP16	Posttranslational modification, protein turnover, chaperones	ubiquitin carboxyl-terminal hydrolase	H35Q, T57A, Q421R, I512M, G514E, E534D, H580R, E780D, T781A,	--
ENSGALG00000015831	ENSGALT00000025523	SNX14	Intracellular trafficking, secretion, and vesicular transport	sorting nexin 14	H631Q,	--
ENSGALG00000015833	ENSGALT00000025528		Nucleotide transport and metabolism	5-Nucleotidase	S427G, K525R,	--
ENSGALG00000015849	ENSGALT00000025553	ME1	Energy production and conversion	malic enzyme	I548V,	--
ENSGALG00000015854	ENSGALT00000025559	PGM3	Carbohydrate transport and metabolism	Catalyzes the conversion of glucosamine-6-phosphate to glucosamine-1-phosphate (By similarity)	E138D, H182Q, K297E,	--
ENSGALG00000015864	ENSGALT00000025575	IBTK	Cell cycle control, cell division, chromosome partitioning ,Cytoskeleton ,	regulator of chromosome condensation	L15Q, S948N, M1078V, G1083R, T1179I, I1231V,	--
ENSGALG00000015897	ENSGALT00000025619	IMPG1	Posttranslational modification, protein turnover, chaperones	Interphotoreceptor matrix proteoglycan	L441V, E449D, P662S, Q677R, D752N, V914I,	--
ENSGALG00000015910	ENSGALT00000025644	CD109	General function prediction only	alpha-2-macroglobulin domain protein	L362V, T732A, Q842R, V883I, L1052V, V1314I, L1329F,	--
ENSGALG00000015916	ENSGALT00000025651	SLC17A5	Carbohydrate transport and metabolism	Transporter	S246R,	--
ENSGALG00000015928	ENSGALT00000025673		Replication, recombination and repair	DEAD (Asp-Glu-Ala-Asp) box polypeptide	C231R, I564V, D611N, Q624R,	--
ENSGALG00000015935	ENSGALT00000025684	SMYD1	General function prediction only	Histone-lysine N-methyltransferase	D268N,	--
ENSGALG00000015939	ENSGALT00000025688	THNSL2	Amino acid transport and metabolism	threonine synthase	V326A, V363A,	--
ENSGALG00000015949	ENSGALT00000025705	ASRGL1	Amino acid transport and metabolism	asparaginase	K112E, I139V,	--
ENSGALG00000015951	ENSGALT00000025707	OGFRL1	RNA processing and modification	Opioid growth factor receptor-like 1	S525G, T541S, N555T, K594R,	--
ENSGALG00000015959	ENSGALT00000025716	SMAP1	Signal transduction mechanisms	small ArfGAP 1	M328L, V419M,	--
ENSGALG00000016024	ENSGALT00000025813	SETD4	General function prediction only	SET domain containing 4	T63A, A184V, I208V,	--
ENSGALG00000016042	ENSGALT00000025844	CHAF1B	General function prediction only	chromatin assembly factor 1 subunit	T251A, G453S, I501T,	--
ENSGALG00000016059	ENSGALT00000025873	ETS2	Transcription	v-ets erythroblastosis virus E26 oncogene homolog 2 (avian)	V182A,	--
ENSGALG00000016094	ENSGALT00000025934	SFXN5	Intracellular trafficking, secretion, and vesicular transport	Sideroflexin 5	L69V, W70R,	--
ENSGALG00000016138	ENSGALT00000025993	DSCAM	Signal transduction mechanisms	down syndrome cell adhesion molecule	E778G, V981G,	--
ENSGALG00000016147	ENSGALT00000026015	ZBTB21	General function prediction only	zinc finger protein 295	E427D,	--
ENSGALG00000016169	ENSGALT00000026056	TMPRSS3	Posttranslational modification, protein turnover, chaperones	protease	A273T, V334L,	--
ENSGALG00000016185	ENSGALT00000026078	SLC37A1	Carbohydrate transport and metabolism	transporter	A69V, M270T, V413I,	--
ENSGALG00000016186	ENSGALT00000026084	PDE9A	General function prediction only	phosphodiesterase	C245W,	--
ENSGALG00000016196	ENSGALT00000026110		Amino acid transport and metabolism	cysteine synthase	M306T,	--
ENSGALG00000016221	ENSGALT00000026150	EFHC2	Function unknown	EF-hand domain (C-terminal) containing	D282E, P382L, F539V, Q703E,	--
ENSGALG00000016224	ENSGALT00000026158	MAOA	Amino acid transport and metabolism	AMine oXidase	N164D, A171T, R235C, K320R,	--
ENSGALG00000016227	ENSGALT00000026167	GPR34	Intracellular trafficking, secretion, and vesicular transport	G protein-coupled receptor 34	M157L, T195N,	--
ENSGALG00000016238	ENSGALT00000026181	MED14	Transcription	mediator complex subunit 14	K495R, A565S,	--
ENSGALG00000016254	ENSGALT00000026210	OTC	Amino acid transport and metabolism	ornithine carbamoyltransferase	T156E, Y167H, L227F,	--
ENSGALG00000016262	ENSGALT00000026223	XK	Function unknown	X-linked Kx blood group (McLeod syndrome)	R107K, I384V,	--
ENSGALG00000016278	ENSGALT00000026244	PRIM2	Replication, recombination and repair	DNA primase is the polymerase that synthesizes small RNA primers for the Okazaki fragments on both template strands at replication forks during chromosomal DNA synthesis (By similarity)	L52V, S480N,	--
ENSGALG00000016279	ENSGALT00000026245	RAB23	Intracellular trafficking, secretion, and vesicular transport	RAB23, member RAS oncogene family	N133K,	--
ENSGALG00000016284	ENSGALT00000026255	TAB3	Cytoskeleton	TGF-beta activated kinase 1 MAP3K7 binding protein	L476I, A508S,	--
ENSGALG00000016293	ENSGALT00000026276	BMP5	Signal transduction mechanisms	bone morphogenetic protein	D229E,	--
ENSGALG00000016294	ENSGALT00000026278	HMGCLL1	Amino acid transport and metabolism	Catalyzes the condensation of the acetyl group of acetyl-CoA with 3-methyl-2-oxobutanoate (2-oxoisovalerate) to form 3-carboxy-3-hydroxy-4-methylpentanoate (2-isopropylmalate) (By similarity)	A199V,	--
ENSGALG00000016299	ENSGALT00000026294	FAM83B	Posttranslational modification, protein turnover, chaperones	Family with sequence similarity 83, member B	A42S, M739V, N762S,	--
ENSGALG00000016300	ENSGALT00000026295	TINAG	General function prediction only	tubulointerstitial nephritis	K21E, R361K, K365N,	K21E,
ENSGALG00000016309	ENSGALT00000026310	KLHL31	Signal transduction mechanisms	Kelch-like 31 (Drosophila)	A451T,	--
ENSGALG00000016313	ENSGALT00000026320	GCLC	Lipid transport and metabolism	glutamate--cysteine ligase	G503S, V531I,	--
ENSGALG00000016321	ENSGALT00000026331	ICK	Signal transduction mechanisms	Male germ cell-associated kinase	S361P, L400P, V404A,	--
ENSGALG00000016324	ENSGALT00000026335	GSTA4	Posttranslational modification, protein turnover, chaperones	Glutathione S-Transferase	Q104H, N120S, W155F,	--
ENSGALG00000016342	ENSGALT00000026360	MYOM2	General function prediction only	Myomesin 2	A43V, A368P, L1178M, D1361A, S1398A, G1436S,	--
ENSGALG00000016358	ENSGALT00000026389	PTCHD1	Intracellular trafficking, secretion, and vesicular transport	Patched domain containing 1	K702R,	--
ENSGALG00000016359	ENSGALT00000026390	FBXO25	Posttranslational modification, protein turnover, chaperones	F-box protein 25	R188G,	--
ENSGALG00000016363	ENSGALT00000026395	ACP1	Signal transduction mechanisms	PHOsphatase	G134V,	--
ENSGALG00000016367	ENSGALT00000026400	SNTG2	Posttranslational modification, protein turnover, chaperones	syntrophin, gamma	L210I, T229A, L232M, N364S, Q371R,	--
ENSGALG00000016377	ENSGALT00000026413	PXDN	General function prediction only	Peroxidasin homolog	V316I, Y510H, S1201T,	--
ENSGALG00000016382	ENSGALT00000026423	MBTPS2	Posttranslational modification, protein turnover, chaperones	membrane-bound transcription factor peptidase, site 2	L326F, N406S,	--
ENSGALG00000016384	ENSGALT00000026428	MYT1L	Transcription	Myelin transcription factor	N184S,	--
ENSGALG00000016385	ENSGALT00000026430	TSSC1	General function prediction only	tumor suppressing subtransferable candidate 1	V261A,	--
ENSGALG00000016387	ENSGALT00000026434	TRAPPC12	Function unknown	trafficking protein particle complex 12	A8V, D19E, S174G, R316G, L326I,	--
ENSGALG00000016400	ENSGALT00000026450	RSAD2	Signal transduction mechanisms	Radical S-adenosyl methionine domain containing 2	Q134R, N227K, E258V, M290V,	--
ENSGALG00000016418	ENSGALT00000026483	CXorf23	Function unknown	chromosome X open reading frame 23	K286R, T433A, H440R,	--
ENSGALG00000016437	ENSGALT00000026516	TAF1B	Transcription	TATA box binding protein (Tbp)-associated factor, RNA polymerase I, B	L191F, M207V,	--
ENSGALG00000016442	ENSGALT00000026525	RRM2	Nucleotide transport and metabolism	Provides the precursors necessary for DNA synthesis. Catalyzes the biosynthesis of deoxyribonucleotides from the corresponding ribonucleotides (By similarity)	K183R,	--
ENSGALG00000016448	ENSGALT00000026539	KCNF1	Inorganic ion transport and metabolism	Potassium voltage-gated channel	L56M,	--
ENSGALG00000016465	ENSGALT00000026566	ZPAX	Intracellular trafficking, secretion, and vesicular transport	zona pellucida glycoprotein 2 (sperm receptor)	A134V, I144V, V258M, Y273C, N348S, T606A, H765Y, K774Q,	--
ENSGALG00000016469	ENSGALT00000026573	MSGN1	Transcription	Mesogenin 1	E65D,	--
ENSGALG00000016470	ENSGALT00000026574	KCNS3	Inorganic ion transport and metabolism	potassium voltage-gated channel, delayed-rectifier, subfamily S, member	Y483C,	--
ENSGALG00000016479	ENSGALT00000026588	LAPTM4A	Intracellular trafficking, secretion, and vesicular transport	lysosomal protein transmembrane 4	Q59H, E61D,	--
ENSGALG00000016480	ENSGALT00000026589	SDC1	Intracellular trafficking, secretion, and vesicular transport	Cell surface proteoglycan (By similarity)	S133N, A186T,	--
ENSGALG00000016483	ENSGALT00000026593		Amino acid transport and metabolism	amino acid	T79A, G290S, I331L, L513V,	G290S,
ENSGALG00000016491	ENSGALT00000026601	APOB	Intracellular trafficking, secretion, and vesicular transport	apolipoprotein B (including Ag(x) antigen)	G1018E, A1031G, S1172L, A1177P, S1248R, V1901I, L2062I, N2114G, S2326N, F2381C, D2399E, K2577Q, A2752S, K2791R, I2800V, N2885S, E2904D, T3131I, K3372Q, V3428I, K3461R, S3549T, E3838K,	--
ENSGALG00000016497	ENSGALT00000026614	UBXN2A	Nuclear structure	UBX domain protein 2A	D19G, Y31C, V108L, D169A, T218A, L257V, K267N, N273H,	--
ENSGALG00000016505	ENSGALT00000026627	GPN1	General function prediction only	xpa-binding protein	A307V,	--
ENSGALG00000016523	ENSGALT00000026665	RS1	Signal transduction mechanisms	retinoschisin 1	A196S,	--
ENSGALG00000016547	ENSGALT00000026699	TXLNG	Function unknown	taxilin gamma	N328S,	--
ENSGALG00000016549	ENSGALT00000026701	CTPS2	Nucleotide transport and metabolism	Catalyzes the ATP-dependent amination of UTP to CTP with either L-glutamine or ammonia as the source of nitrogen (By similarity)	N516D,	--
ENSGALG00000016554	ENSGALT00000026713	ACE2	Posttranslational modification, protein turnover, chaperones	angiotensin I converting enzyme (peptidyl-dipeptidase A) 2	K309R, V447I,	--
ENSGALG00000016559	ENSGALT00000026721	PIGA	Cell wall/membrane/envelope biogenesis	phosphatidylinositol glycan anchor biosynthesis, class A	R122H, Q442R, Y443C,	--
ENSGALG00000016560	ENSGALT00000026723	EPT1	Lipid transport and metabolism	phosphotransferase 1	H251R, I281V,	--
ENSGALG00000016568	ENSGALT00000026743	MOSPD2	Intracellular trafficking, secretion, and vesicular transport	motile sperm domain containing 2	G269A,	--
ENSGALG00000016569	ENSGALT00000026744	FANCB	General function prediction only	Fanconi anemia, complementation group B	T255S, V340I, P371L, D474N, G511S, H569R, H799N, V848I, N893S, Q922R,	--
ENSGALG00000016576	ENSGALT00000026755	OFD1	Function unknown	Oral-facial-digital syndrome 1	E189Q, C621Y, T680A, V764I, D765N,	--
ENSGALG00000016579	ENSGALT00000026762	RAB9A	General function prediction only	RAB9A, member RAS oncogene family	K4R,	--
ENSGALG00000016584	ENSGALT00000026770	EGFL6	Signal transduction mechanisms	EGF-like-domain, multiple 6	K77R, G211S, T273A, E343D, T514I,	--
ENSGALG00000016590	ENSGALT00000026777	TLR7	Signal transduction mechanisms	TOLL-like receptor	E44G, R61S, Q138R, L667I, R733Q, I989V,	--
ENSGALG00000016615	ENSGALT00000026816	GPR143	Intracellular trafficking, secretion, and vesicular transport	G protein-coupled receptor 143	T359S,	--
ENSGALG00000016642	ENSGALT00000026867	PRSS55	Posttranslational modification, protein turnover, chaperones	protease, serine, 55	T66S, P77S, Q165R, S173G,	--
ENSGALG00000016649	ENSGALT00000026875	MTMR9	General function prediction only	Myotubularin related protein 9	V332I, S340A, A478P,	--
ENSGALG00000016651	ENSGALT00000026878		Cell wall/membrane/envelope biogenesis	Nad-dependent epimerase dehydratase	K81R,	--
ENSGALG00000016661	ENSGALT00000026890	BLK	Signal transduction mechanisms	B lymphoid tyrosine kinase	N326S,	--
ENSGALG00000016664	ENSGALT00000026893	NEIL2	Replication, recombination and repair	nei endonuclease VIII-like 2 (E. coli)	V170A, H196N, Q284R,	--
ENSGALG00000016674	ENSGALT00000026906	EFHC1	Function unknown	EF-hand domain (C-terminal) containing	Y125H, A425T, P537T, F640L,	--
ENSGALG00000016676	ENSGALT00000026909	MCM3	Replication, recombination and repair	dna replication licensing factor	D295V, A524S, L659G, H725P,	D295V, L659G,
ENSGALG00000016684	ENSGALT00000026922	RHAG	Inorganic ion transport and metabolism	ammonium Transporter	G21A, I96V, T134A,	--
ENSGALG00000016685	ENSGALT00000026923	ASMT	Secondary metabolites biosynthesis, transport and catabolism	methyltransferase	P276A,	--
ENSGALG00000016686	ENSGALT00000026925	AKAP17A	Function unknown	A kinase (PRKA) anchor protein 17A	G57A,	--
ENSGALG00000016687	ENSGALT00000026926	P2RY8	Intracellular trafficking, secretion, and vesicular transport	purinergic receptor P2Y, G-protein coupled, 8	K92T, Y226N, T277S,	--
ENSGALG00000016697	ENSGALT00000026946	MUT	Lipid transport and metabolism	methylmalonyl-coA mutase	K122R, I370V, F388Y, I444V,	--
ENSGALG00000016709	ENSGALT00000026965	RCAN2	Transcription	regulator of calcineurin 2	E30V, T90A, G190A,	--
ENSGALG00000016710	ENSGALT00000026967	CYP39A1	Secondary metabolites biosynthesis, transport and catabolism	Cytochrome p450	F73L, S121T, M134V, N262S,	--
ENSGALG00000016713	ENSGALT00000026970	PLA2G7	Lipid transport and metabolism	Phospholipase A2, group VII (Platelet-activating factor acetylhydrolase, plasma)	N227D, E237D, D245G, N249D, I322V,	--
ENSGALG00000016720	ENSGALT00000026983	CD2AP	Signal transduction mechanisms	SH3-domain kinase binding protein 1	P63S, A67S, K109R, K114R, S231P, Q240P, D484A,	--
ENSGALG00000016723	ENSGALT00000026987		Signal transduction mechanisms	g protein-coupled receptor	I241L, V267L, I411V, A628S,	--
ENSGALG00000016724	ENSGALT00000026988	RGN	Carbohydrate transport and metabolism	SMP-30 gluconolaconase LRE domain protein	S192G, L196M, W271Q,	--
ENSGALG00000016727	ENSGALT00000026992	JADE3	General function prediction only	PHD finger protein	K557R,	--
ENSGALG00000016728	ENSGALT00000026993	RP2	Function unknown	Retinitis pigmentosa 2 (X-linked recessive)	I81V, Q97R, T126S,	--
ENSGALG00000016739	ENSGALT00000027018	HERC2	Posttranslational modification, protein turnover, chaperones	e3 ubiquitin protein ligase	A2407V, V3395I, A3428T,	--
ENSGALG00000016740	ENSGALT00000027021	OCA2	Inorganic ion transport and metabolism	oculocutaneous albinism II	S34C, I137V, G199R, H207Q, L405I,	--
ENSGALG00000016758	ENSGALT00000027059	LIPT1	Coenzyme transport and metabolism	lipoyltransferase 1	V62I,	--
ENSGALG00000016767	ENSGALT00000027071		Transcription	AF4 FMR2 family, member	H433Q,	--
ENSGALG00000016768	ENSGALT00000027073	LONRF2	Posttranslational modification, protein turnover, chaperones	Peptidase S16, lon domain protein	A424V, S428G,	--
ENSGALG00000016776	ENSGALT00000027083	TBC1D8	General function prediction only	TBC1 domain family member	T370S, H629R,	--
ENSGALG00000016792	ENSGALT00000027111	MFSD9	Carbohydrate transport and metabolism	major facilitator Superfamily	I96V, N218S,	--
ENSGALG00000016795	ENSGALT00000027116	TGFBRAP1	Intracellular trafficking, secretion, and vesicular transport	transforming growth factor, beta receptor associated protein 1	D691N,	--
ENSGALG00000016799	ENSGALT00000027121	NCK2	Signal transduction mechanisms	NCK adaptor protein	V123M,	--
ENSGALG00000016805	ENSGALT00000027128	SULT1C3	Function unknown	sulfotransferase family, cytosolic, 1C, member	K173Q,	--
ENSGALG00000016811	ENSGALT00000027142		Cell cycle control, cell division, chromosome partitioning ,Cytoskeleton ,	Cell division control protein	Q115R,	--
ENSGALG00000016832	ENSGALT00000027174	PROZ	Posttranslational modification, protein turnover, chaperones	protein Z, vitamin K-dependent plasma glycoprotein	Q131E, D168G, E321K, T395A,	--
ENSGALG00000016844	ENSGALT00000027211	RAB20	General function prediction only	RAB20, member RAS oncogene family	K168R,	--
ENSGALG00000016852	ENSGALT00000027228	TNFSF13B	Intracellular trafficking, secretion, and vesicular transport	tumor necrosis factor ligand superfamily member 13B	K91T,	--
ENSGALG00000016853	ENSGALT00000027229	ABHD13	General function prediction only	Hydrolase	I253V,	--
ENSGALG00000016854	ENSGALT00000027230	LIG4	Replication, recombination and repair	DNA ligase	Q380R, Y596H, S681C,	--
ENSGALG00000016862	ENSGALT00000027240	KDELC1	General function prediction only	KDEL (Lys-Asp-Glu-Leu) containing	N165H, K242R, I472V,	--
ENSGALG00000016863	ENSGALT00000027242	TEX30	General function prediction only	Hydrolase of the alpha beta-hydrolase	T76A,	--
ENSGALG00000016872	ENSGALT00000027260	PCCA	Energy production and conversion	Catalyzes a 2-step reaction, involving the ATP-dependent carboxylation of the covalently attached biotin in the first step and the transfer of the carboxyl group to pyruvate in the second (By similarity)	S327N, R508G, Q526E,	--
ENSGALG00000016875	ENSGALT00000027264		Carbohydrate transport and metabolism	citrate lyase	A41S, S118L,	--
ENSGALG00000016878	ENSGALT00000027267	TM9SF2	Function unknown	transmembrane 9 superfamily	N185K, N235S,	--
ENSGALG00000016893	ENSGALT00000027298	UGGT2	Carbohydrate transport and metabolism	UDP-glucose glycoprotein glucosyltransferase	V736I, V738L, K1283E,	--
ENSGALG00000016894	ENSGALT00000027300	DNAJC3	Posttranslational modification, protein turnover, chaperones	DnaJ (Hsp40) homolog, subfamily C, member 3	Q256R,	--
ENSGALG00000016896	ENSGALT00000027309	ABCC4	Defense mechanisms	(ABC) transporter	K293N, Q603E,	--
ENSGALG00000016897	ENSGALT00000027314	GPR180	Intracellular trafficking, secretion, and vesicular transport	G protein-coupled receptor 180	M294R, I326V,	--
ENSGALG00000016898	ENSGALT00000027315	TGDS	Cell wall/membrane/envelope biogenesis	dTDP-glucose 4-6-dehydratase	C217W, K340Q,	--
ENSGALG00000016906	ENSGALT00000027327	SPRY2	General function prediction only	Sprouty homolog	L169M,	--
ENSGALG00000016911	ENSGALT00000027336	RNF219	General function prediction only	Ring finger protein 219	Q138P, L382I, T424S,	--
ENSGALG00000016913	ENSGALT00000027341		General function prediction only	SLAIN motif family, member	Y337C, N459T,	--
ENSGALG00000016917	ENSGALT00000027349	CLN5	Posttranslational modification, protein turnover, chaperones	Ceroid-lipofuscinosis, neuronal 5	E70D,	--
ENSGALG00000016934	ENSGALT00000027374		Intracellular trafficking, secretion, and vesicular transport	protocadherin 20	I347V, M412T, T579S, R927G,	--
ENSGALG00000016936	ENSGALT00000027376	TDRD3	General function prediction only	Tudor domain containing 3	P92R, P337A, Q561H, P572T, H589N,	--
ENSGALG00000016943	ENSGALT00000027385	OLFM4	Intracellular trafficking, secretion, and vesicular transport	olfactomedin 4	I180V,	--
ENSGALG00000016945	ENSGALT00000027389	LECT1	Signal transduction mechanisms	Leukocyte cell derived chemotaxin 1	R69K, N239T,	--
ENSGALG00000016965	ENSGALT00000027417	DNAJC15	Posttranslational modification, protein turnover, chaperones	DNAj domain protein	L141F,	--
ENSGALG00000016968	ENSGALT00000027420	CCDC122	Function unknown	Coiled-coil domain containing 122	K81N, D92E,	--
ENSGALG00000016980	ENSGALT00000027434	COG3	Intracellular trafficking, secretion, and vesicular transport	Component of oligomeric Golgi complex 3	D393E,	--
ENSGALG00000016981	ENSGALT00000027435	SPERT	Function unknown	spermatid associated	S12N, T16A, F51C, Q273K, G316D,	--
ENSGALG00000016986	ENSGALT00000027443	LCP1	Cytoskeleton	Microtubule associated monoxygenase, calponin and LIM domain containing	S537G,	--
ENSGALG00000016988	ENSGALT00000027446	RUBCNL	Signal transduction mechanisms	run domain Beclin-1 interacting and cystein-rich containing	Q337R, T347R, K734R,	--
ENSGALG00000016990	ENSGALT00000027449	LRCH1	Cytoskeleton	Leucine-rich repeats and calponin homology (CH) domain containing	A285V, E404D,	--
ENSGALG00000016993	ENSGALT00000027453	SUCLA2	Energy production and conversion	Succinyl-CoA synthetase subunit beta	V45L,	--
ENSGALG00000017008	ENSGALT00000027473		Cell cycle control, cell division, chromosome partitioning ,Cytoskeleton ,	regulator of chromosome condensation	T136S,	--
ENSGALG00000017011	ENSGALT00000027478	TRIM13	Posttranslational modification, protein turnover, chaperones	tripartite motif containing	S167A, E346D, I362F,	--
ENSGALG00000017017	ENSGALT00000027487	SERPINE3	Posttranslational modification, protein turnover, chaperones	Serpin peptidase inhibitor, clade	I4V, G106S, V108A, R130C, D164G, D166N, S180N, H223Q,	--
ENSGALG00000017023	ENSGALT00000027506	NEK5	Signal transduction mechanisms	calcium calmodulin-dependent protein kinase	K291E, S383N, Y390C, E449G,	--
ENSGALG00000017031	ENSGALT00000027516		Signal transduction mechanisms	Dual specificity protein phosphatase	I167V, S472A,	--
ENSGALG00000017037	ENSGALT00000027526	NHLRC3	Function unknown	NHL repeat containing 3	T65I,	--
ENSGALG00000017038	ENSGALT00000027527	PROSER1	Posttranslational modification, protein turnover, chaperones	proline and serine rich 1	N207T, T299A, T439A, N509S, Q551P,	--
ENSGALG00000017046	ENSGALT00000027540	POSTN	Cell wall/membrane/envelope biogenesis	Beta-Ig-H3 fasciclin	R528Q,	--
ENSGALG00000017050	ENSGALT00000027547	SMAD9	Transcription	SMAD family member	I204V,	--
ENSGALG00000017064	ENSGALT00000027564	RFC3	Replication, recombination and repair	DNA polymerase III subunit delta'	I189V,	--
ENSGALG00000017068	ENSGALT00000027569	KL	Carbohydrate transport and metabolism	beta-glucosidase	G238S, A249V, H267L, F348Y, N860S, M868I, P951L,	--
ENSGALG00000017073	ENSGALT00000027576	BRCA2	Replication, recombination and repair	breast cancer 2, early onset	Q121R, H134N, S140R, Q221R, S430C, T675S, L822S, L946V, S1021P, D1121G, T1238S, S1275G, L1498Q, E1660G, D1671G, K1741M, T1787A, K1927E, M1997R, D2301G, S2321A, L2362V, Q2391P, I2408V, L2421S, S2479G, Q2497H, I2510V, L3046F, I3224L, T3262A, S3351Y, R3352K, S3353P,	S140R, L1498Q, S2321A, S2479G, L3046F,
ENSGALG00000017077	ENSGALT00000027586	HSPH1	Posttranslational modification, protein turnover, chaperones	heat shock protein 70	S298A, E559D, K697R,	--
ENSGALG00000017079	ENSGALT00000027590	USPL1	Posttranslational modification, protein turnover, chaperones	ubiquitin specific peptidase like 1	T7A, S101T, Q270R, I491M, L577F, S732A, K809R,	--
ENSGALG00000017085	ENSGALT00000027598	SLC7A1	Amino acid transport and metabolism	amino acid	N380S,	--
ENSGALG00000017089	ENSGALT00000027606	SLC46A3	Carbohydrate transport and metabolism	Solute carrier family 46, member 3	R2K, L288M,	--
ENSGALG00000017091	ENSGALT00000027608	FLT1	Signal transduction mechanisms	Growth factor receptor	I557V, T595M, N602S, T1170A,	--
ENSGALG00000017118	ENSGALT00000027655	MIPEP	Posttranslational modification, protein turnover, chaperones	mitochondrial intermediate peptidase	H53Q, S516L,	--
ENSGALG00000017120	ENSGALT00000027658	SACS	Function unknown	Spastic ataxia of Charlevoix-Saguenay (Sacsin)	H372Y, N591S, S804N, T1079I, K1206R, N1230S, S2357C, S2441C, V2994M, Q3202E, N3344S,	--
ENSGALG00000017133	ENSGALT00000027677	EEF1AKMT1	Replication, recombination and repair	N-6 adenine-specific DNA methyltransferase 2	I46V, F99L,	--
ENSGALG00000017135	ENSGALT00000027680	CRYL1	Lipid transport and metabolism	Dehydrogenase	K60R,	--
ENSGALG00000017156	ENSGALT00000027709	DDX10	Replication, recombination and repair	atp-dependent rna helicase	I224V, Y332F, R614G,	--
ENSGALG00000017167	ENSGALT00000027727	SLC35F2	Amino acid transport and metabolism ,Carbohydrate transport and metabolism ,	membrane	I263L,	--
ENSGALG00000017183	ENSGALT00000027763	MMP13	Posttranslational modification, protein turnover, chaperones	matrix metallopeptidase	Y371N,	--
ENSGALG00000019061	ENSGALT00000027769		Posttranslational modification, protein turnover, chaperones	matrix metallopeptidase	L8P, V14I, H440R,	--
ENSGALG00000017184	ENSGALT00000027770	MMP7	Posttranslational modification, protein turnover, chaperones	Matrix metallopeptidase 7 (Matrilysin, uterine)	E244D,	--
ENSGALG00000006297	ENSGALT00000027784	TRPC7	Intracellular trafficking, secretion, and vesicular transport	Transient receptor potential cation channel subfamily C member	V756A,	--
ENSGALG00000017201	ENSGALT00000027803	CEP57	Cytoskeleton	centrosomal protein	K90R,	--
ENSGALG00000017202	ENSGALT00000027807	FAM76B	Function unknown	Family with sequence similarity 76, member	I337V,	--
ENSGALG00000017211	ENSGALT00000027819	MRE11A	Replication, recombination and repair	Exonuclease	N239H, E302D, M337T,	--
ENSGALG00000017216	ENSGALT00000027828		Amino acid transport and metabolism	symporter	N48S, T220I, V441I, P463S, L496V, N504S,	--
ENSGALG00000017228	ENSGALT00000027844	MTNR1B	Intracellular trafficking, secretion, and vesicular transport	Melatonin receptor 1b	N315S,	--
ENSGALG00000017229	ENSGALT00000027850	FAT3	Function unknown	Cadherins are calcium dependent cell adhesion proteins (By similarity)	K1235R, P1393L, K1728R, V1906L, I2358V, A4396T,	--
ENSGALG00000017234	ENSGALT00000027854	FOLH1	General function prediction only	glutamate carboxypeptidase	F134S, K394T,	--
ENSGALG00000017235	ENSGALT00000027863	NOX4	Intracellular trafficking, secretion, and vesicular transport	NADPH oxidase 4	K93N, N135S, K241R, F247L,	--
ENSGALG00000017237	ENSGALT00000027865	TYR	Carbohydrate transport and metabolism	tyrosinase	L13F, Q326R, K334R, L408I, L468F, K502R, T506A,	--
ENSGALG00000017239	ENSGALT00000027869	CTSC	Posttranslational modification, protein turnover, chaperones	cysteine	D505G,	--
ENSGALG00000017266	ENSGALT00000027916	KCTD14	General function prediction only	potassium channel tetramerisation domain containing 14	V162I, Q206E,	--
ENSGALG00000017289	ENSGALT00000027944	C12orf4	Function unknown	chromosome 12 open reading frame 4	I95V,	--
ENSGALG00000017296	ENSGALT00000027951	KLHL42	General function prediction only	kelch domain containing 5	L377H, P406S,	--
ENSGALG00000017307	ENSGALT00000027966	POLD3	Replication, recombination and repair	polymerase (DNA-directed), delta 3, accessory subunit	N66D, H75Q, N247S, V249A, K317R, S368A,	--
ENSGALG00000017312	ENSGALT00000027978	PPME1	General function prediction only	Alpha beta hydrolase	T375A,	--
ENSGALG00000017316	ENSGALT00000027985	UCP3	Posttranslational modification, protein turnover, chaperones	uncoupling protein	V215L,	--
ENSGALG00000017318	ENSGALT00000027987	PAAF1	General function prediction only	proteasomal ATPase-associated factor 1	D186E,	--
ENSGALG00000017333	ENSGALT00000028012	LCMT2	Posttranslational modification, protein turnover, chaperones	Leucine carboxyl methyltransferase 2	F148I, S149C, D268N, I363M, N366D, F387V, R410G, S466R, Q573R, P580A,	--
ENSGALG00000017389	ENSGALT00000028076	SIX4	Transcription	SIX homeobox 4	S695G, Q796P,	--
ENSGALG00000017392	ENSGALT00000028080	SPDYA	Function unknown	speedy homolog A (Xenopus laevis)	L28P,	--
ENSGALG00000006334	ENSGALT00000028108	LAP3	General function prediction only	Leucine aminopeptidase 3	S301P, V338I,	--
ENSGALG00000013920	ENSGALT00000029187	SUV39H2	General function prediction only	Histone-lysine N-methyltransferase	S328R,	--
ENSGALG00000013510	ENSGALT00000029725	UTP15	RNA processing and modification	UTP15, U3 small nucleolar ribonucleoprotein, homolog (S. cerevisiae)	I181V, S327P,	--
ENSGALG00000004683	ENSGALT00000029895	TPD52L2	General function prediction only	tumor protein	D196E,	--
ENSGALG00000014069	ENSGALT00000030003	TP53I11	Function unknown	tumor protein p53 inducible protein 11	V71I,	--
ENSGALG00000019042	ENSGALT00000030044	ALG8	Carbohydrate transport and metabolism	Asparagine-linked glycosylation 8, alpha-1,3-glucosyltransferase homolog (S. cerevisiae)	F167S, F232C, L456P, E468G,	--
ENSGALG00000017090	ENSGALT00000030102	POMP	Posttranslational modification, protein turnover, chaperones	Proteasome maturation protein	T17A, G113S,	--
ENSGALG00000017044	ENSGALT00000030118	TRPC4	Intracellular trafficking, secretion, and vesicular transport	Transient receptor potential cation channel subfamily C member	S782G, A908S,	--
ENSGALG00000016785	ENSGALT00000030235	IL1RL1	Signal transduction mechanisms	Interleukin 1 receptor-like 1	W72R, K238R, R308M, R525K,	--
ENSGALG00000016228	ENSGALT00000030326	NYX	Signal transduction mechanisms ,Extracellular structures ,	Nyctalopin	T166I,	--
ENSGALG00000014981	ENSGALT00000030474	COX17	Posttranslational modification, protein turnover, chaperones	cytochrome C oxidase	G50Q,	--
ENSGALG00000011803	ENSGALT00000030620	EMP1	General function prediction only	Epithelial membrane protein	Y118F,	Y118F,
ENSGALG00000019336	ENSGALT00000030640	CEP83	Function unknown	Coiled-coil domain containing 41	H357Q, E363A, I383M, L405V, S480A, T519A,	--
ENSGALG00000008776	ENSGALT00000030714	HYAL6	Carbohydrate transport and metabolism	hyaluronoglucosaminidase	V10A, H218R, L236H, I417V,	--
ENSGALG00000008740	ENSGALT00000030716	POT1	General function prediction only	protection of telomeres 1 homolog (S. pombe)	I230V, V362A, H403R,	--
ENSGALG00000019397	ENSGALT00000030740	CERK	Lipid transport and metabolism	diacylglycerol kinase	F180L,	--
ENSGALG00000013441	ENSGALT00000030979	INVS	General function prediction only	Ankyrin Repeat	S641N, E744K, C924R, M942L, S1091A,	--
ENSGALG00000012917	ENSGALT00000031019	CDH6	Function unknown	Cadherins are calcium dependent cell adhesion proteins (By similarity)	N573S,	--
ENSGALG00000000755	ENSGALT00000031372	ACER3	Function unknown	alkaline	I48V,	--
ENSGALG00000019761	ENSGALT00000031388	CHAD	General function prediction only	Chondroadherin	M76L, V168A, A192T, A267T, E325D,	--
ENSGALG00000016699	ENSGALT00000031534	OPN5L2	Function unknown	opsin-5-like	L188V, N259H, S260C,	--
ENSGALG00000014976	ENSGALT00000031549	GATA6	Transcription	GATA binding protein	G342S,	--
ENSGALG00000019867	ENSGALT00000031579	WDCP	Function unknown	Chromosome 2 open reading frame 44	G229S, K330R, N394S, S507G, N531D, L609P, E617D, I623V, T673A, S752G,	--
ENSGALG00000016427	ENSGALT00000031606	ADAM17	Extracellular structures	ADAM metallopeptidase domain 17	Y108H, K214R, K375R,	--
ENSGALG00000019894	ENSGALT00000031633	TMEM14A	Function unknown	Transmembrane protein 14A	V40M, F60V,	--
ENSGALG00000016174	ENSGALT00000031649	LMBRD1	Intracellular trafficking, secretion, and vesicular transport	lysosomal cobalamin transporter. Required to export cobalamin from lysosomes allowing its conversion to cofactors (By similarity)	R299Q,	--
ENSGALG00000015590	ENSGALT00000031683		Function unknown	mannosidase	N63S, N82S, M88V, R309K, N435D,	--
ENSGALG00000019921	ENSGALT00000031690	NDUFAF4	Function unknown	NADH dehydrogenase (ubiquinone) complex I, assembly factor 4	D56N,	--
ENSGALG00000014953	ENSGALT00000031721	RWDD1	Function unknown	RWD domain containing 1	I114V,	--
ENSGALG00000014834	ENSGALT00000031745	NCOA7	Replication, recombination and repair	Nuclear receptor coactivator 7	K435N, V587I,	--
ENSGALG00000013829	ENSGALT00000031778	REPS1	General function prediction only	RALBP1 associated Eps domain containing 1	T113A, S117P, S154A,	--
ENSGALG00000012275	ENSGALT00000031806	EPM2A	Signal transduction mechanisms	epilepsy, progressive myoclonus type 2A, Lafora disease (laforin)	P288A, I292L,	--
ENSGALG00000011418	ENSGALT00000031830	CCR6	Signal transduction mechanisms	Chemokine (C-C motif) receptor 6	K276R,	--
ENSGALG00000011155	ENSGALT00000031842	ARV1	Function unknown	ARV1 homolog (S. cerevisiae)	T168M,	--
ENSGALG00000009811	ENSGALT00000031933	TATDN3	Replication, recombination and repair	tatd family	I73V, S86G,	--
ENSGALG00000009796	ENSGALT00000031937	RPS6KC1	Signal transduction mechanisms	Ribosomal protein s6	V51I, T158M, P280S, S410M, G428D, A434G, N474S, P498L, G517K,	--
ENSGALG00000015961	ENSGALT00000032015	SUCLG1	Energy production and conversion	Succinyl-CoA ligase ADP-forming subunit alpha	I44V, E324V,	--
ENSGALG00000014971	ENSGALT00000032056	SLC2A9	Carbohydrate transport and metabolism	major facilitator Superfamily	S254T,	--
ENSGALG00000013617	ENSGALT00000032107	PDGFRL	Signal transduction mechanisms	platelet-derived growth factor receptor-like	N303S, Q307L, N321S,	--
ENSGALG00000010769	ENSGALT00000032201	HPGD	Lipid transport and metabolism ,Secondary metabolites biosynthesis, transport and catabolism ,	short-chain dehydrogenase reductase	N170S,	--
ENSGALG00000020262	ENSGALT00000032304	NKAP	Function unknown	NFkB activating	K158N, K200R,	--
ENSGALG00000020316	ENSGALT00000032399	IL13RA2	Signal transduction mechanisms	interleukin 13 receptor, alpha 2	V115L, T295A,	--
ENSGALG00000020331	ENSGALT00000032424		Signal transduction mechanisms	Purinergic receptor P2Y, G-protein coupled, 10	P156L,	--
ENSGALG00000011225	ENSGALT00000032511	SLC25A47	Function unknown	mitochondrial carrier protein	T62A, F276L,	--
ENSGALG00000009978	ENSGALT00000032587		Translation, ribosomal structure and biogenesis	Hydrolyzes D-tyrosyl-tRNA(Tyr) into D-tyrosine and free tRNA(Tyr). Could be a defense mechanism against a harmful effect of D-tyrosine (By similarity)	E75Q,	--
ENSGALG00000009320	ENSGALT00000032629	PSEN1	Intracellular trafficking, secretion, and vesicular transport	catalytic subunit of the gamma-secretase complex, an endoprotease complex that catalyzes the intramembrane cleavage of integral membrane proteins such as Notch receptors and APP (beta-amyloid precursor protein). Requires the other members of the gamma-secretase complex to have a protease activity. May play a role in intracellular signaling and gene expression or in linking chromatin to the nuclea…	A330V,	--
ENSGALG00000009269	ENSGALT00000032631	PTGR2	General function prediction only	alcohol dehydrogenase	I36M, S305T,	--
ENSGALG00000008148	ENSGALT00000032650	MYBPC3	Cytoskeleton	myosin binding protein C, cardiac	I57L, S114P, P120L, T232S, L714V, I749T,	--
ENSGALG00000006868	ENSGALT00000032690	CRACR2B	General function prediction only	EF-hand calcium binding domain	R122K, E307D,	--
ENSGALG00000020569	ENSGALT00000032871	DIMT1	Translation, ribosomal structure and biogenesis	Specifically dimethylates two adjacent adenosines (A1518 and A1519) in the loop of a conserved hairpin near the 3'-end of 16S rRNA in the 30S particle. May play a critical role in biogenesis of 30S subunits (By similarity)	D276E,	--
ENSGALG00000012348	ENSGALT00000032911	MCM6	Replication, recombination and repair	dna replication licensing factor	K131R, V698E, I777L,	--
ENSGALG00000009553	ENSGALT00000032997	SMC4	Cell cycle control, cell division, chromosome partitioning	Required for chromosome condensation and partitioning (By similarity)	E158Q, N427K, K564E, E697K, A874S, A916T, E978V,	--
ENSGALG00000008905	ENSGALT00000033102	HABP2	Posttranslational modification, protein turnover, chaperones	protease	R191Q,	--
ENSGALG00000011149	ENSGALT00000033111	PLA2R1	Intracellular trafficking, secretion, and vesicular transport	Phospholipase A2 receptor 1, 180kDa	Q401R, L423I, E509G, R570G, Q917K, E1029D, I1252T, D1291E, K1375E,	--
ENSGALG00000011131	ENSGALT00000033125	TANK	Function unknown	TRAF family member-associated NFKB activator	M212V, H375R,	--
ENSGALG00000011104	ENSGALT00000033134	GCG	Posttranslational modification, protein turnover, chaperones	Glucagon	G19S, P100L, S105R,	--
ENSGALG00000008785	ENSGALT00000033152	MCCC1	Energy production and conversion	Catalyzes a 2-step reaction, involving the ATP-dependent carboxylation of the covalently attached biotin in the first step and the transfer of the carboxyl group to pyruvate in the second (By similarity)	H447R, N450K, K491R, I604L, M706V,	--
ENSGALG00000020736	ENSGALT00000033212	PHOSPHO2	General function prediction only	PHOsphatase	A76V, R154K, S170N,	--
ENSGALG00000007609	ENSGALT00000033235	ARHGAP19	General function prediction only	Rho GTPase activating protein 19	N276K, L469P,	--
ENSGALG00000008691	ENSGALT00000033264	SNX5	Intracellular trafficking, secretion, and vesicular transport	sorting nexin	M373L,	--
ENSGALG00000006983	ENSGALT00000033285	DNTT	Replication, recombination and repair	DNA polymerase	I371V, S408G, K415E,	--
ENSGALG00000007810	ENSGALT00000033329	PPP4R2	Signal transduction mechanisms	protein phosphatase 4, regulatory subunit 2	T197A,	--
ENSGALG00000007324	ENSGALT00000033346	TP63	Chromatin structure and dynamics	induces growth arrest or apoptosis depending on the physiological circumstances and cell type. Involved in cell cycle regulation as a trans-activator that acts to negatively regulate cell division by controlling a set of genes required for this process. One of the activated genes is an inhibitor of cyclin-dependent kinases. Apoptosis induction seems to be mediated either by stimulation of BAX and…	S533T,	--
ENSGALG00000006038	ENSGALT00000033354	TGFBR3	Signal transduction mechanisms	Transforming growth factor, beta receptor III	H78N,	H78N,
ENSGALG00000008493	ENSGALT00000033408	METTL21A	General function prediction only	Putative methyltransferase	R87H,	--
ENSGALG00000007768	ENSGALT00000033524	AURKA	Cell cycle control, cell division, chromosome partitioning	aurora kinase	T398I,	--
ENSGALG00000005462	ENSGALT00000033525	ZP4	Extracellular structures	zona pellucida glycoprotein	T275I, S324F,	--
ENSGALG00000020922	ENSGALT00000033576	C1orf21	Function unknown	chromosome 1 open reading frame 21	S75P,	--
ENSGALG00000006161	ENSGALT00000033674	CHMP1A	Cell motility	Charged multivesicular body protein	L191F,	--
ENSGALG00000004569	ENSGALT00000033690	UNC5B	Signal transduction mechanisms	unc-5 homolog	T501A, H542P,	--
ENSGALG00000005411	ENSGALT00000033814	MEIOB	Function unknown	meiosis specific with OB domains	L139V,	--
ENSGALG00000006648	ENSGALT00000033880	SPECC1L	Cytoskeleton	Microtubule associated monoxygenase, calponin and LIM domain containing	V92A, N1055D,	--
ENSGALG00000021193	ENSGALT00000034132	STARD5	Intracellular trafficking, secretion, and vesicular transport	StAR-related lipid transfer (START) domain containing 5	A56G, K203E,	--
ENSGALG00000021235	ENSGALT00000034218	NPY6R	Signal transduction mechanisms	Neuropeptide Y receptor	V94A, M110V, E207Q,	--
ENSGALG00000021303	ENSGALT00000034344	NPY7R	Function unknown	neuropeptide Y receptor	L340I, S351R,	--
ENSGALG00000021345	ENSGALT00000034432	B3GNT9	Carbohydrate transport and metabolism	UDP-GlcNAc beta-Gal beta-1,3-N-acetylglucosaminyltransferase	A223T,	--
ENSGALG00000002968	ENSGALT00000034635	ZNF341	General function prediction only	Zinc finger protein 341	S288P, P402A,	--
ENSGALG00000003181	ENSGALT00000034772	SURF2	Function unknown	Surfeit 2	A235V,	--
ENSGALG00000021552	ENSGALT00000034869	RASL10A	General function prediction only	GTP-Binding protein	G129S,	--
ENSGALG00000001434	ENSGALT00000034894	STOM	Posttranslational modification, protein turnover, chaperones	Band 7 protein	G28E, I270V,	--
ENSGALG00000021572	ENSGALT00000034909	SSH2	Signal transduction mechanisms	Dual specificity protein phosphatase	I577V, V582A, E959D, T1012M, E1038D, H1132R, D1180G, G1278R, E1327Q,	--
ENSGALG00000004574	ENSGALT00000034931	NPPB	Nucleotide transport and metabolism		R103G,	--
ENSGALG00000001573	ENSGALT00000035122	P2RX1	Inorganic ion transport and metabolism	purinergic receptor P2X, ligand-gated ion channel	L37V, S62N, V211I, K217R, S286T,	--
ENSGALG00000001189	ENSGALT00000035150	NCF1	RNA processing and modification	Neutrophil cytosolic factor 1	R307S,	--
ENSGALG00000021685	ENSGALT00000035194	SERINC2	Function unknown	serine incorporator	A261V,	--
ENSGALG00000000551	ENSGALT00000035250	C26H6ORF89	Function unknown	Chromosome 6 open reading frame 89	Q130H, I150V, T152A, R163S, Q186R, T242A, H253R,	--
ENSGALG00000021855	ENSGALT00000035401	CCDC39	Function unknown		Q142R, K288R, R524K, I603M,	--
ENSGALG00000013511	ENSGALT00000035832	ANKRA2	General function prediction only	Ankyrin Repeat	S150A,	--
ENSGALG00000008407	ENSGALT00000036214	IRAK2	Signal transduction mechanisms	Serine Threonine protein kinase	E116D, T134K, N227D, D325G, I444V, Y480H, C655R,	--
ENSGALG00000007483	ENSGALT00000036226	LRIG1	Signal transduction mechanisms	Leucine-rich repeats and immunoglobulin-like domains	N1093K,	--
ENSGALG00000006097	ENSGALT00000036246	PLXNA1	Signal transduction mechanisms	Plexin A2	P1114S,	--
ENSGALG00000005688	ENSGALT00000036253	DNASE1L3	General function prediction only	Deoxyribonuclease	S8L, P122A,	--
ENSGALG00000001709	ENSGALT00000036295	MUSTN1	Function unknown	musculoskeletal, embryonic nuclear protein 1	D70G,	--
ENSGALG00000017191	ENSGALT00000036419	ANGPTL5	General function prediction only	Angiopoietin-like 5	I24R,	--
ENSGALG00000017186	ENSGALT00000036426	BIRC2	Posttranslational modification, protein turnover, chaperones	Baculoviral IAP repeat containing	V467I,	--
ENSGALG00000016997	ENSGALT00000036484	RB1	Cell cycle control, cell division, chromosome partitioning	retinoblastoma 1	S110R, V236A, P613S, K755R,	--
ENSGALG00000016946	ENSGALT00000036497	SUGT1	Signal transduction mechanisms	Suppressor of G2 allele of skp1	T109P,	--
ENSGALG00000016912	ENSGALT00000036512	EDNRB	Intracellular trafficking, secretion, and vesicular transport	endothelin receptor type B	T258A,	--
ENSGALG00000016899	ENSGALT00000036519	DCT	Lipid transport and metabolism	Dopachrome tautomerase	A3V, Q319H, D405N,	--
ENSGALG00000022758	ENSGALT00000036535	GGACT	Function unknown	Gamma-glutamylamine cyclotransferase	H70Y, H71Q,	--
ENSGALG00000016803	ENSGALT00000036571	ST6GAL2	Carbohydrate transport and metabolism	ST6 beta-galactosamide alpha-2,6-sialyltranferase	R119Q,	--
ENSGALG00000016774	ENSGALT00000036585	NPAS2	Transcription	Neuronal PAS domain protein 2	L455I, M783L,	--
ENSGALG00000016602	ENSGALT00000036617		Function unknown	Rho GTPase activating protein 6	K92R,	--
ENSGALG00000016241	ENSGALT00000036654	ATP6AP2	Energy production and conversion	ATPase, H transporting, lysosomal accessory protein 2	I328V,	--
ENSGALG00000022804	ENSGALT00000036686		Function unknown	trafficking protein particle complex	F1063C, E1072D,	--
ENSGALG00000016708	ENSGALT00000036689	ENPP4	General function prediction only	type i phosphodiesterase nucleotide pyrophosphatase	N142T, N170T, I369V,	--
ENSGALG00000016173	ENSGALT00000036706	UBASH3A	Carbohydrate transport and metabolism	Ubiquitin associated and SH3 domain containing	E277K, I535V,	--
ENSGALG00000016027	ENSGALT00000036747	CBR1	Lipid transport and metabolism ,Secondary metabolites biosynthesis, transport and catabolism ,	short-chain dehydrogenase reductase	V104I,	--
ENSGALG00000015358	ENSGALT00000036887	MYH15	Cytoskeleton	myosin heavy chain	S134P, T175S, P294Q, G626S, S678T,	--
ENSGALG00000015249	ENSGALT00000036922	TTF2	Replication, recombination and repair	Transcription termination factor, RNA polymerase II	G148R, E209A, G220E, T286A, S309P, P484A, Q896P, S992G,	--
ENSGALG00000015233	ENSGALT00000036926	ATP1B1	Inorganic ion transport and metabolism	This is the non-catalytic component of the active enzyme, which catalyzes the hydrolysis of ATP coupled with the exchange of Na( ) and K( ) ions across the plasma membrane	K188R, H213Q,	--
[truncated: 1,240 more rows]
